# Supplementary material
Source: PubMed Central journal article supplement (PMC1133872)
Supplement: bj3810635add.pdf [file bj3810635add.pdf]

**Table S1. DNA probe and primers utilized for real time PCR analysis.** Genbank numbers corresponding to elements on U95A Affymetrix arrays and utilized in design of real time PCR probe and primers are shown in the first column. Subsequent columns show sequences of fluorescently labeled DNA probes and DNA primers designed utilizing the Primer Express™ program and synthesized by Applied Biosystems.

Supplemental Table 1  
Probe and Primer Sequences Utilized for qRT-PCR Analysis

| Gene Name            | Accession #         | Forward Primer                 | Reverse Primer                | Probe                                 |
|----------------------|---------------------|--------------------------------|-------------------------------|---------------------------------------|
| Amphiregulin         | NM_001657           | ACTCGGCTCAGGCCATTATG           | CCAGAAAATGGTTCACGCTTC         | TGCTGGATTGGACCTCAATGACACCTACT         |
| BRCA1                | U14680              | TGTGAGGCACCTGTGGTGA            | CAGTCTCTGGCACTGGTAGAG         | CCGAGAGTGGGTGTTGGACAGTGTAGC           |
| BRCA2                | U43746              | CGAAGATTGTTTATGCATCATGTTT      | GCGGTAAAATTTGGATTCTGTATCTC    | CTGTGTACCCTTTCGCACAACCTAAGGAACGTC AAG |
| BUB1                 | AF046078            | GAGACATCCCATGAGGATCTGC         | CCTACACTTGGCCCCATACG          | CCCAGGAAAAGGTCCGAGGTTAATCCA           |
| cdc2                 | NM_001786           | AATCTATGATCCAGCCAAACGAA        | TTCTTAATCTGATT GTCCAATCATTAAA | TTCTGGCAAATGGCACTGAATCATCCATA         |
| c-fos <sup>1</sup>   | PDAR Cat# 4318292M  |                                |                               |                                       |
| c-jun <sup>1</sup>   | PDAR Cat# 4318299M  |                                |                               |                                       |
| c-myc                | V00568              | TCCCTCCACTCGGAAGGACT           | GCATTTTCGGTTGTTGCTGA          | TCCTGCTGCCAAGAGGGTCAAGTTG             |
| COX-2                | NM_000963           | GAATCATTACCAGGCCAAATTG         | TCTGTACTGCGGGTGGAACA          | TGGCAGGGTTGCTGGTGGTAGGA               |
| CyclinD <sup>1</sup> | PDAR Cat# 4318323M  |                                |                               |                                       |
| DUSP5                | NM_004419           | TGACCCACCTACACTACAAATGGA       | CTTCTTGAAAGTGGGAGCTAATGTC     | CCCTGTGGAAGACAGCCACACGG               |
| EGF                  | NM_001963           | GAA GCC CCA TTC TCT CCT ATC AG | GTC AGC TCC ATT TGG TGT GGT   | TAA CCC ATT ATG GCA ACA AAG GGC CC    |
| EGFR                 | X00663              | GCGTCTCTTGCCGGAATGT            | GGCTCACCTCCAGAAGCTT           | CCGAGGCAGGGAATGCGTGG                  |
| Epiregulin           | NM_001432           | TGCATGGACAGTGCATCTATCTG        | AGTGTTCACATCGGACACCAGTA       | TGGACATGAGTCAAACCTACTGCAGGTGTGA       |
| ErbB2 <sup>2</sup>   | Hs00170433_m1       |                                |                               |                                       |
| ErbB3                | NM_001982           | ACGGTTATGTCATGCCAGATACA        | GAAGTACAGCCACTGAAGAAAGG       | CCTCAAAGGTACTCCCTCCTCCCGG             |
| ErbB4                | L07868              | AAC AAT GTG ACG GCA GAT GCT A  | TAG GTC CTG AGC AGC CTC CA    | TTA CGT CAG TGA CTG CTG CCA TCG AGA   |
| GADD45               | L24498              | CGACCTGCAGTTTGCAATATGA         | GCATCCCCACCTTATCCAT           | TCTCGGCTGGAGAGCAGAAGACCG              |
| HB-EGF               | M60278/NM_001945    | GGACCTTTTGAGAGTCACTTTATCCT     | TCCCCTGCTCCTCCTTGT            | AAGCCACAAGCACTGGCCACACC               |
| JUNB                 | NM_002229           | TGGTGGCCTCTCTACACGA            | GGGTGGCCAGGTTGAC              | ACAACTCCTGAAACCGAGCCTGGC              |
| MKP-1 <sup>1</sup>   | PDAR Cat # 4319443F |                                |                               |                                       |
| p21                  | NM_078467/NM_000389 | TGGAGACTCTCAGGGTCGAAA          | GGCGTTTGGAGTGGTAGAAATC        | CGGCGGCAGACCAGCATGAC                  |
| p53                  | X02469              | TTCCTGAAAACAACGTTCTGTCC        | TCTGGACCTGGGTCTTCAAGTAA       | TGCCGTCCCAAGCAATGGATGATT              |
| PHRP                 | J03580/M17183       | TGTCTGACACCTCCACAACGTC         | GGAAAGTCTCTGCTGAAAATTTCA      | CTGGAGCTCGATTACCGGAGGCA               |
| Rabbit MEK1 EE       | Z30163              | ACGAGATGGCCAACGAATTC           | AGTAGTGTGTCCCCTGGAGTCTCT      | TGGGCACCAGGTCTTATATGTCGCC             |
| S9 Control           | NM_001013           | GGCTCCGGAACAAACGTG             | GCGGCCTTGGGATCT               | TCTGGAGGGTCAAATTTACCCTGGCC            |
| TGFa                 | NM_003236           | CCTGGCTGTCTTATCATCACA          | GGGCGCTGGGCTTCTC              | ATACACTGCTGCCAGGTCCGAAAACACT          |
| VEGF <sup>2</sup>    | Hs00173626_m1       |                                |                               |                                       |

<sup>1</sup>Predeveloped Assay Reagents (PE AppliedBiosystems)

<sup>2</sup>Assays-on-Demand (PE AppliedBiosystems)

**Table S2. Real time PCR analysis of a subset of genes differentially regulated by MEK1 EE.** mRNA abundance in rAd MEK1EE infected cells relative to LacZ infected MCF-12A cells is shown for the time points indicated. Genbank accession numbers corresponding to elements on the U95A array and those utilized in qRT-PCR probe/primer design are indicated for each gene analyzed. Positive numbers and negative numbers indicate fold up and down regulation, respectively.

Supplemental Table 2

qRT PCR Analysis of a Subset of Genes Differentially Regulated by MEK1<sup>1</sup>

| Gene            | Accession # <sup>2</sup> |        | 0h   | 4h   | 6h   | 8h   | 12h  | 16h  | 24h  |
|-----------------|--------------------------|--------|------|------|------|------|------|------|------|
| Amphiregulin    | NM_001657                | Taqman | 1.1  | -1.4 | 2.1  | 1.9  | 4.0  | 8.0  | 17.1 |
|                 | M30704                   | Array  | 1.0  | 1.0  | 2.0  | 1.0  | 2.0  | 4.0  | 11.0 |
| BRCA1           | U14680                   | Taqman | 1.1  | -2.0 | 1.0  | 2.1  | 5.3  | 12.1 | 13.0 |
|                 | L78833                   | Array  | 1.0  | 0.3  | 0.8  | 2.0  | 23.0 | 4.7  | 6.6  |
| BRCA2           | U43746                   | Taqman | 1.0  | -2.1 | 1.4  | 2.8  | 4.6  | 15.2 | 16.9 |
|                 | U43746                   | Array  | 0.4  | 1.0  | 1.6  | 0.8  | 1.6  | 3.2  | 6.7  |
| BUB1            | AF046078                 | Taqman | 1.1  | 1.3  | -1.1 | 2.0  | 6.1  | 7.4  | 14.9 |
|                 | AF053305                 | Array  | 1.2  | 0.3  | 0.2  | 2.1  | 2.2  | 7.2  | 7.6  |
| cdc2            | NM_001786                | Taqman | 1.1  | 1.1  | 1.2  | 1.6  | 5.2  | 10.3 | 9.7  |
|                 | X05360                   | Array  | 0.7  | 1.1  | 1.6  | 1.8  | 2.8  | 2.8  | 4.6  |
| c-fos           | PDAR                     | Taqman | 1.1  | -1.1 | 2.8  | 2.8  | 6.3  | 4.1  | 5.8  |
|                 | V01512                   | Array  | 1.1  | 1.6  | 2.9  | 4.7  | 7.1  | 6.4  | 5.1  |
| c-jun           | PDAR                     | Taqman | 1.5  | -1.3 | -1.3 | -1.2 | 1.4  | 2.0  | 2.0  |
|                 | J04111                   | Array  | 1.0  | 0.7  | 0.9  | 1.2  | 1.3  | 1.2  | 1.2  |
| c-myc           | V00568                   | Taqman | 1.4  | 1.4  | 3.3  | 2.6  | 2.3  | 2.6  | 5.3  |
|                 | V00568                   | Array  | 0.9  | 1.2  | 2.5  | 2.1  | 1.6  | 1.9  | 3.6  |
| COX-2           | NM_000963                | Taqman | -1.1 | -1.1 | -1.2 | 1.3  | 7    | 19.7 | 97   |
|                 | U04636                   | Array  | 1.7  | -1.6 | 1.8  | 14.3 | 3.1  | 4.5  | 4.3  |
| CyclinD         | PDAR                     | Taqman | 4.0  | 2.1  | 4.3  | 3.6  | 2.4  | 8.3  | 3.0  |
|                 | M64349                   | Array  | 1.0  | 1.5  | 0.7  | 2.1  | 1.8  | 1.2  | 1.4  |
| DUSP5           | NM_004419                | Taqman | 1.3  | -1.1 | 6.1  | 5.6  | 7.4  | 9.8  | 36.7 |
|                 | U15932                   | Array  | 1.0  | 0.9  | 4.1  | 4.3  | 3.2  | 4.9  | 24.0 |
| EGF             | NM_001963                | Taqman | 0.0  | 0.0  | 0.0  | 0.0  | 0.0  | 0.0  | 0.0  |
|                 | X04571                   | Array  | ND   |
| EGFR            | X00663                   | Taqman | 1.1  | 1.2  | 1.3  | 1.0  | 1.6  | 2.1  | 2.2  |
|                 | X00588                   | Array  | 1.6  | 0.8  | 1.7  | 0.4  | 1.1  | 0.9  | 1.3  |
| Epiregulin      | NM_001432                | Taqman | -1.5 | -1.3 | 4.2  | 4.6  | 4.6  | 8.1  | 46.5 |
|                 | D30783                   | Array  | 0.6  | 2.1  | 5.3  | 13.1 | 11.1 | 3.2  | 13.6 |
| ErbB2           | NM_004448                | Taqman | -1.5 | 1.2  | -1.5 | -1.6 | -1.3 | -1.1 | -2.3 |
|                 | M11730                   | Array  | ND   |
| ErbB3           | NM_001982                | Taqman | -1.8 | 1.1  | 1.4  | -1.6 | -1.3 | -1.4 | -1.7 |
|                 | M34309                   | Array  | -0.9 | -1.3 | -3.2 | -2.0 | -1.7 | -2.3 | -2.3 |
|                 | M34309                   | Array  | -1.0 | -1.6 | -1.4 | -2.3 | -1.7 | -5.1 | -1.5 |
| ErbB4           | L07868                   | Taqman | 0.0  | 0.0  | 0.0  | 0.0  | 0.0  | 0.0  | 0.0  |
|                 | L07868                   | Array  | ND   |
| GADD45 $\alpha$ | L24498                   | Taqman | 1.5  | -1.2 | 2.0  | 2.5  | 1.4  | 2.4  | 8.3  |
|                 | M602974                  | Array  | 1.2  | 1.1  | -1.2 | 2.1  | 1.5  | 1.6  | 4.5  |
| HB-EGF          | M60278                   | Taqman | -1.1 | -1.0 | 3.2  | 4.2  | 3.4  | 6.9  | 45.2 |
|                 | M60278                   | Array  | 1.3  | 1.5  | 2.7  | 1.8  | 2.3  | 2.8  | 33.8 |
| JUNB            | NM_002229                | Taqman | 1.2  | 1.7  | 2.5  | 1.1  | 1.9  | 2.7  | 4.3  |
|                 | M29039                   | Array  | 1.3  | 0.9  | 2.4  | 1.5  | 1.4  | 0.7  | 3.0  |
| MKP1            | PDAR                     | Taqman | 2.2  | 1.0  | 1.7  | -1.2 | 1.5  | 2.0  | 3.4  |
|                 | X68277                   | Array  | 1.3  | 1.1  | 2.4  | 0.9  | 1.0  | 0.9  | 2.0  |
| p-21            | NM_078467/NM_00389       | Taqman | 1.1  | -1.0 | -1.6 | -3.2 | 1.5  | 1.3  | 1.2  |
|                 | U03106                   | Array  | 1.0  | -1.2 | -1.4 | -2.8 | -2.1 | -1.5 | -1.2 |
| p-53            | X02469                   | Taqman | 1.1  | 1.7  | 1.3  | -1.3 | 1.1  | 1.0  | 1.0  |
|                 | X02469                   | Array  | 1.4  | 0.9  | 0.8  | 1.0  | 0.9  | 0.8  | 1.0  |
| PHRP            | M24351                   | Taqman | 1.1  | -1.3 | 2.6  | 6.1  | 17.1 | 21.1 | 90.5 |
|                 | M24351                   | Array  | 0.7  | 0.5  | 0.9  | 2.6  | 3.9  | 2.8  | 6.1  |
| TGFa            | NM_003236                | Taqman | 1.1  | 1.1  | 2.8  | 6.1  | 4.9  | 9.8  | 9.8  |
|                 | X70340                   | Array  | 1.0  | 1.0  | 2.0  | 4.0  | 4.0  | 5.0  | 8.0  |
| VEGF            | NM_003376                | Taqman | 1.2  | 1.2  | 2.3  | 2.3  | 2.8  | 5.7  | 14.9 |
|                 | AF022375                 | Array  | 1.0  | 0.9  | 1.4  | 1.8  | 1.4  | 1.9  | 4.9  |

<sup>1</sup>Fold change in mRNA abundance in MCF-12A cells infected with rAd MEK1EE relative to infection with rAd Lac-Z.

<sup>2</sup>Genbank accession numbers corresponding to elements on the Affymetrix U95A microarray and used for probe/primer design for validation by qRT PCR.

Positive numbers indicate fold upregulation and negative numbers indicate fold down regulation.  
ND= not detected. 0 indicates mRNA was undetectable (CT values  $\geq$  35)

**Table S3. Table of 1347 elements on Affymetrix U95A array detecting changes in mRNA abundance of greater than or equal to 2.5 fold. Column A.** Genbank accession numbers corresponding to the Affymetrix U95A probe set ids shown in column D. **Column B.** Genes coordinately up-regulated (Group A) and coordinately down-regulated (Group B, see also figure 1.) **Column C.** Gene annotation provided by Affymetrix. **Columns E and F.** The Gene Ontology Consortium (GO) biological process id and description, respectively, assigned by Affymetrix for each probe set id. **Columns G-M.** Fold expression change detected at each time point after infection. Gene expression changes are a comparison of LacZ infected and MEK1 EE infected cells at the same time point. These elements are also represented in the heat map shown in figure 1. Positive numbers and negative numbers indicate fold up and down regulation, respectively. Genes cited in the text are bolded in blue.



| GenBank         | Group    | Affymetric Gene Annotation                                          | Affymetrix Probe set id | GO id      | GO Biological Process                                            | 0           | 4           | 6           | 8           | 12          | 16          | 24           |
|-----------------|----------|---------------------------------------------------------------------|-------------------------|------------|------------------------------------------------------------------|-------------|-------------|-------------|-------------|-------------|-------------|--------------|
| AA926959        | A        | om88h08.s1 cDNA                                                     | 37347_at                | 79         | regulation of CDK activity                                       | 1.6         | 1.0         | 1.1         | 1.3         | 1.4         | 2.2         | 4.3          |
| <b>U22398</b>   | <b>B</b> | <b>Cdk-inhibitor p57KIP2 (KIP2)</b>                                 | <b>1787_at</b>          | <b>80</b>  | <b>G1 phase of mitotic cell cycle</b>                            | <b>1.1</b>  | <b>-1.2</b> | <b>-1.3</b> | <b>-3.0</b> | <b>-4.4</b> | <b>-9.7</b> | <b>-4.9</b>  |
| <b>U22398</b>   | <b>B</b> | <b>Cdk-inhibitor p57KIP2 (KIP2)</b>                                 | <b>39545_at</b>         | <b>80</b>  | <b>G1 phase of mitotic cell cycle</b>                            | <b>-1.4</b> | <b>1.1</b>  | <b>1.1</b>  | <b>-1.7</b> | <b>-2.3</b> | <b>-3.0</b> | <b>-5.9</b>  |
| D64137          | B        | KIP2 gene Cdk-inhibitor p57KIP2                                     | 38673_s_at              | 80         | G1 phase of mitotic cell cycle                                   | 1.2         | 1.0         | -1.2        | -2.8        | -4.0        | -10.0       | -5.0         |
| L25876          | A        | protein tyrosine phosphatase (CIP2)                                 | 1599_at                 | 82         | G1/S transition of mitotic cell cycle                            | 2.0         | 1.0         | -2.4        | -1.8        | 2.1         | 2.6         | 8.1          |
| AL022325        | A        | DNA sequence from Fosmid 27C3 on chromosome 22q11.2-qte             | 39374_at                | 85         | G2 phase of mitotic cell cycle                                   | -2.3        | 1.0         | -4.3        | 1.4         | 6.6         | 1.9         | 13.1         |
| U28386          | A        | nuclear localization sequence receptor hSRP1alpha                   | 40407_at                | 85         | G2 phase of mitotic cell cycle                                   | 1.3         | 1.2         | -2.3        | 1.2         | 1.7         | 2.3         | 3.5          |
| M25753          | A        | cyclin B_3_end                                                      | 34736_at                | 86         | G2/M transition of mitotic cell cycle                            | 1.8         | -1.2        | -1.3        | 1.6         | 3.2         | 2.7         | 6.1          |
| U75285          | A        | apoptosis inhibitor survivin gene                                   | 40532_at                | 86         | G2/M transition of mitotic cell cycle                            | 2.4         | 1.9         | 2.4         | 1.2         | 2.1         | 1.5         | 4.7          |
| M68520          | A        | cdc2-related protein kinase                                         | 1792_q_at               | 86         | G2/M transition of mitotic cell cycle                            | -1.1        | 1.3         | 1.5         | 1.5         | 2.1         | 2.6         | 1.4          |
| <b>M25753</b>   | <b>A</b> | <b>cyclin B</b>                                                     | <b>1945_at</b>          | <b>86</b>  | <b>G2/M transition of mitotic cell cycle</b>                     | <b>2.0</b>  | <b>1.0</b>  | <b>-1.6</b> | <b>1.2</b>  | <b>2.4</b>  | <b>2.9</b>  | <b>7.2</b>   |
| Ai417038        | A        | Ig78b04.x1 cDNA                                                     | 40533_at                | 86         | G2/M transition of mitotic cell cycle                            | 1.6         | 1.6         | -1.6        | 1.4         | 8.2         | 11.2        | 8.1          |
| X98263          | A        | M-phase phosphoprotein, mpp6                                        | 31864_at                | 87         | M phase of mitotic cell cycle                                    | 1.5         | 1.2         | 1.0         | 2.4         | 1.8         | 2.6         | 1.8          |
| X07024          | A        | X chromosome mRNA for CCG1 protein                                  | 112_g_at                | 114        | G1-specific transcription in mitotic cell cycle                  | 3.1         | 1.2         | 2.7         | -1.9        | -1.2        | -1.7        | 1.2          |
| AJ132917        | A        | methyl-CpG-binding protein 2                                        | 34355_at                | 122        | negative regulation of transcription from Pol II promoter        | 1.3         | 1.5         | -3.4        | -1.2        | 1.2         | 1.2         | 1.1          |
| X89750          | A        | TGIF protein                                                        | 38805_at                | 122        | negative regulation of transcription from Pol II promoter        | -1.2        | 1.2         | 1.9         | 1.9         | 1.7         | 2.1         | 3.7          |
| U69196          | A        | cDNA (clone=198754)                                                 | 38288_at                | 122        | negative regulation of transcription from Pol II promoter        | -1.4        | 1.7         | 1.0         | 2.1         | 1.3         | 1.7         | 3.5          |
| L41870          | A        | retinoblastoma susceptibility protein                               | 1900_at                 | 122        | negative regulation of transcription from Pol II promoter        | 1.4         | 1.2         | -3.1        | 2.7         | 1.9         | -3.0        | -1.2         |
| M99701          | B        | (pp21)                                                              | 38317_at                | 122        | negative regulation of transcription from Pol II promoter        | -1.2        | -1.3        | -1.1        | 1.3         | -1.5        | -1.3        | -3.2         |
| <b>AF040963</b> | <b>B</b> | <b>Mad4 homolog (Mad4)</b>                                          | <b>38639_at</b>         | <b>122</b> | <b>negative regulation of transcription from Pol II promoter</b> | <b>-1.2</b> | <b>-1.2</b> | <b>1.3</b>  | <b>-2.2</b> | <b>-2.1</b> | <b>-2.3</b> | <b>-4.6</b>  |
| U63909          | A        | prostate apoptosis response protein par-4                           | 40621_at                | 122        | negative regulation of transcription from Pol II promoter        | -1.1        | -1.2        | 1.0         | 2.7         | 1.5         | 1.5         | 1.9          |
| AF027219        | A        | ZNF202 beta (ZNF202)                                                | 38302_at                | 122        | negative regulation of transcription from Pol II promoter        | -1.4        | -1.2        | -1.2        | 3.3         | -1.3        | -1.5        | 2.6          |
| <b>U48807</b>   | <b>A</b> | <b>MAP kinase phosphatase (MKP-2)</b>                               | <b>1788_s_at</b>        | <b>165</b> | <b>MAPKKK cascade</b>                                            | <b>1.1</b>  | <b>-1.5</b> | <b>10.3</b> | <b>5.5</b>  | <b>4.3</b>  | <b>4.9</b>  | <b>4.3</b>   |
| U67156          | A        | mitogen-activated Kinase Kinase Kinase 5 (MAPKKK5)                  | 1327_s_at               | 165        | MAPKKK cascade                                                   | -1.8        | 1.8         | -1.2        | 2.9         | 2.3         | 2.1         | 1.6          |
| M64347          | B        | novel growth factor receptor                                        | 31805_at                | 165        | MAPKKK cascade                                                   | 1.1         | 1.0         | -1.2        | -1.5        | -2.0        | -1.5        | -3.2         |
| X88487          | A        | A2b adenosine receptor                                              | 36324_at                | 187        | activation of MAPK                                               | 1.7         | -1.2        | 1.4         | 2.8         | 1.9         | 1.9         | 2.0          |
| L08797          | B        | (clone L5) orphan G protein-coupled receptor                        | 649_s_at                | 187        | activation of MAPK                                               | 1.5         | 1.2         | -1.4        | -1.8        | -1.2        | -1.4        | -2.6         |
| M57729          | A        | complement component C5                                             | 37816_at                | 187        | activation of MAPK                                               | 1.3         | 2.4         | -6.0        | -1.5        | -2.5        | -6.8        | 10.7         |
| <b>AB013382</b> | <b>A</b> | <b>DUSP6</b>                                                        | <b>41193_at</b>         | <b>188</b> | <b>inactivation of MAPK</b>                                      | <b>1.2</b>  | <b>1.2</b>  | <b>16.2</b> | <b>24.1</b> | <b>26.3</b> | <b>31.3</b> | <b>143.4</b> |
| U28963          | B        | Gps2 (GPS2)                                                         | 35653_at                | 188        | inactivation of MAPK                                             | 1.2         | -2.0        | -1.1        | -1.9        | -2.7        | -3.8        | -1.1         |
| Ai655015        | A        | wb6a10.x1 cDNA                                                      | 39932_at                | 188        | inactivation of MAPK                                             | -1.2        | 1.8         | 2.3         | 1.3         | 2.9         | 2.9         | 4.4          |
| J03798          | A        | autoantigen small nuclear ribonucleoprotein Sm-D                    | 37949_at                | 245        | spliceosome assembly                                             | 4.6         | 1.0         | 2.0         | 2.2         | 4.6         | 1.1         | 1.7          |
| AF027150        | A        | survival of motor neuron protein interacting protein 1              | 41363_at                | 245        | spliceosome assembly                                             | -2.0        | 1.0         | 2.3         | 3.0         | 1.2         | 1.1         | 3.1          |
| X66975          | A        | heterogeneous nuclear ribonucleoprotein                             | 40593_at                | 398        | nuclear mRNA splicing, via spliceosome                           | -1.1        | 1.2         | 1.1         | 1.0         | 1.7         | 2.7         | 1.2          |
| AB011108        | A        | KIAA0536                                                            | 32784_at                | 398        | nuclear mRNA splicing, via spliceosome                           | 2.8         | -1.2        | -1.4        | 1.5         | 1.0         | 1.0         | 1.0          |
| L21990          | A        | spliceosomal protein (SAP 62) gene                                  | 37462_i_at              | 398        | nuclear mRNA splicing, via spliceosome                           | 1.2         | -1.3        | -3.1        | -2.2        | -1.4        | -1.4        | 1.5          |
| L10910          | A        | splicing factor (CC1.3)                                             | 39725_at                | 398        | nuclear mRNA splicing, via spliceosome                           | 1.2         | 1.1         | 1.1         | 2.3         | -1.1        | 1.7         | 2.7          |
| AF016369        | A        | U4/U6 small nuclear ribonucleoprotein hPrp4                         | 37935_at                | 398        | nuclear mRNA splicing, via spliceosome                           | 2.6         | 1.2         | 2.5         | 2.4         | 2.2         | 1.1         | 1.2          |
| AL030996        | A        | dj1189B24.4 (novel PUTATIVE protein)                                | 32124_at                | 398        | nuclear mRNA splicing, via spliceosome                           | -1.3        | 1.5         | 4.5         | 3.8         | 2.7         | 2.1         | 2.3          |
| AL031681        | A        | dJ862K6.2.2 (splicing factor, arginine/serine-rich 6 (SRP55-2))     | 35808_at                | 398        | nuclear mRNA splicing, via spliceosome                           | -1.5        | 1.5         | -1.3        | 1.4         | 1.3         | 2.7         | 1.2          |
| AJ762438        | A        | wg57a07.x1 cDNA                                                     | 32557_at                | 398        | nuclear mRNA splicing, via spliceosome                           | 1.1         | 1.0         | 2.6         | 1.3         | -1.3        | -1.1        | -1.6         |
| <b>U43746</b>   | <b>A</b> | <b>breast cancer susceptibility (BRCA2)</b>                         | <b>32557_at</b>         | <b>724</b> | <b>double-strand break repair via homologous recombination</b>   | <b>-2.3</b> | <b>1.9</b>  | <b>1.6</b>  | <b>-4.3</b> | <b>1.6</b>  | <b>3.2</b>  | <b>6.7</b>   |
| D26018          | A        | KIAA0039                                                            | 37846_at                | 731        | DNA repair synthesis                                             | -1.5        | 3.0         | -1.1        | 1.2         | 2.4         | 3.2         | 2.7          |
| <b>X51688</b>   | <b>A</b> | <b>cyclin A</b>                                                     | <b>40697_at</b>         | <b>910</b> | <b>cytokinesis</b>                                               | <b>2.0</b>  | <b>-1.3</b> | <b>1.7</b>  | <b>2.2</b>  | <b>2.1</b>  | <b>2.5</b>  | <b>5.8</b>   |
| D89357          | A        | CDC2 delta T                                                        | 33324_s_at              | 910        | cytokinesis                                                      | 1.7         | 1.6         | 1.3         | 1.7         | 1.9         | 8.4         | 8.1          |
| <b>X51688</b>   | <b>A</b> | <b>cyclin A</b>                                                     | <b>1943_at</b>          | <b>910</b> | <b>cytokinesis</b>                                               | <b>1.0</b>  | <b>-1.7</b> | <b>3.2</b>  | <b>-1.3</b> | <b>2.4</b>  | <b>4.4</b>  | <b>6.1</b>   |
| <b>Z36714</b>   | <b>A</b> | <b>cyclin F</b>                                                     | <b>1925_at</b>          | <b>910</b> | <b>cytokinesis</b>                                               | <b>1.1</b>  | <b>-1.5</b> | <b>-2.7</b> | <b>1.3</b>  | <b>1.7</b>  | <b>1.7</b>  | <b>3.4</b>   |
| X83441          | A        | DNA ligase IV                                                       | 963_at                  | 910        | cytokinesis                                                      | -1.2        | 1.1         | -1.1        | 2.4         | 2.6         | -1.1        | -1.3         |
| D79987          | A        | KIAA0165                                                            | 38158_at                | 910        | cytokinesis                                                      | 1.4         | -1.2        | -1.6        | 1.2         | 2.1         | 1.9         | 4.8          |
| <b>X05360</b>   | <b>A</b> | <b>CDC2 gene involved in cell cycle control</b>                     | <b>1803_at</b>          | <b>910</b> | <b>cytokinesis</b>                                               | <b>-1.5</b> | <b>1.1</b>  | <b>1.6</b>  | <b>1.8</b>  | <b>2.8</b>  | <b>2.8</b>  | <b>4.6</b>   |
| U66838          | A        | cyclin A1                                                           | 1914_at                 | 910        | cytokinesis                                                      | 1.6         | -1.1        | 2.0         | 2.7         | 3.4         | 3.4         | 11.1         |
| M25753          | A        | cyclin B_3_end                                                      | 34736_at                | 910        | cytokinesis                                                      | 1.8         | -1.2        | -1.3        | 1.6         | 3.2         | 2.7         | 6.1          |
| <b>M81933</b>   | <b>A</b> | <b>cdc25A</b>                                                       | <b>1738_at</b>          | <b>910</b> | <b>cytokinesis</b>                                               | <b>1.4</b>  | <b>1.5</b>  | <b>-1.5</b> | <b>1.4</b>  | <b>5.8</b>  | <b>4.2</b>  | <b>3.8</b>   |
| <b>M81933</b>   | <b>A</b> | <b>cdc25A</b>                                                       | <b>35407_at</b>         | <b>910</b> | <b>cytokinesis</b>                                               | <b>-2.3</b> | <b>-1.1</b> | <b>1.8</b>  | <b>1.1</b>  | <b>5.6</b>  | <b>4.4</b>  | <b>6.2</b>   |
| <b>Y00272</b>   | <b>A</b> | <b>cell cycle control gene CDC2</b>                                 | <b>40915_r_at</b>       | <b>910</b> | <b>cytokinesis</b>                                               | <b>-1.8</b> | <b>-1.1</b> | <b>-1.5</b> | <b>1.2</b>  | <b>1.5</b>  | <b>7.8</b>  | <b>3.9</b>   |
| <b>Z15005</b>   | <b>A</b> | <b>CENP-E</b>                                                       | <b>37173_at</b>         | <b>910</b> | <b>cytokinesis</b>                                               | <b>1.1</b>  | <b>-1.6</b> | <b>4.9</b>  | <b>8.6</b>  | <b>7.3</b>  | <b>9.9</b>  | <b>23.7</b>  |
| X54942          | A        | ckshs2 Cks1 protein homologue                                       | 40690_at                | 910        | cytokinesis                                                      | 1.0         | -1.1        | 1.3         | 1.0         | 1.4         | 2.5         | 2.3          |
| <b>M25753</b>   | <b>A</b> | <b>cyclin B</b>                                                     | <b>1945_at</b>          | <b>910</b> | <b>cytokinesis</b>                                               | <b>2.0</b>  | <b>1.0</b>  | <b>-1.6</b> | <b>1.2</b>  | <b>2.4</b>  | <b>2.9</b>  | <b>7.2</b>   |
| <b>AF991433</b> | <b>A</b> | <b>cyclin E2</b>                                                    | <b>35249_at</b>         | <b>910</b> | <b>cytokinesis</b>                                               | <b>2.2</b>  | <b>1.2</b>  | <b>-1.2</b> | <b>5.7</b>  | <b>13.6</b> | <b>12.6</b> | <b>5.1</b>   |
| U05340          | A        | p55CDC                                                              | 38414_at                | 910        | cytokinesis                                                      | 1.5         | 1.0         | 1.3         | 1.0         | 1.7         | 4.0         | 4.5          |
| AL080146        | A        | DKFZp434B174                                                        | 32263_at                | 910        | cytokinesis                                                      | 1.6         | 1.1         | -1.4        | -2.8        | -1.3        | 2.0         | 5.6          |
| AA926959        | A        | om88h08.s1 cDNA                                                     | 37347_at                | 910        | cytokinesis                                                      | 1.6         | 1.0         | 1.1         | 1.3         | 1.4         | 2.2         | 4.3          |
| Ai382123        | A        | te30a09.x1 cDNA                                                     | 40900_at                | 910        | cytokinesis                                                      | 2.9         | -1.2        | 1.2         | -1.2        | 1.5         | -1.2        | 1.7          |
| X12830          | A        | interleukin-6 (IL-6) receptor                                       | 160032_at               | 1501       | skeletal development                                             | -1.2        | -1.5        | -2.6        | -1.2        | 1.0         | -1.2        | 1.2          |
| X64559          | A        | tetranectin                                                         | 36569_at                | 1501       | skeletal development                                             | -2.6        | -1.2        | -2.6        | 1.2         | 1.7         | -1.2        | 1.0          |
| D13666          | A        | osf-2 osteoblast specific factor                                    | 1451_s_at               | 1501       | skeletal development                                             | -9.9        | -3.4        | -40.9       | -1.8        | 4.0         | 3.6         | -6.6         |
| M22489          | A        | bone morphogenetic protein 2A (BMP-2A)                              | 1113_at                 | 1501       | skeletal development                                             | -1.4        | -2.1        | -1.1        | -1.2        | 1.3         | -1.5        | 3.1          |
| M22489          | A        | bone morphogenetic protein 2A (BMP-2A)                              | 40367_at                | 1501       | skeletal development                                             | -1.2        | -1.9        | 1.0         | 1.1         | 1.1         | -1.5        | 2.5          |
| AF017257        | B        | chromosome 21 derived BAC                                           | 38739_at                | 1501       | skeletal development                                             | -1.1        | -1.1        | -2.6        | -2.1        | -2.4        | -2.5        | -2.8         |
| M64347          | B        | novel growth factor receptor                                        | 31805_at                | 1501       | skeletal development                                             | 1.1         | 1.0         | -1.2        | -1.6        | -2.0        | -1.5        | -3.2         |
| AL031228        | A        | dJ1033B10.10 (membrane protein with histidine rich charge clusters) | 41652_at                | 1501       | skeletal development                                             | 2.4         | 2.9         | 2.2         | 2.3         | 1.4         | 1.1         | -1.3         |
| M22488          | B        | bone morphogenetic protein 1 (BMP-1)                                | 39407_at                | 1502       | cartilage condensation                                           | 3.6         | -1.3        | -1.7        | -3.2        | -2.1        | -4.8        | -1.6         |
| M16961          | A        | alpha-2-HS-glycoprotein alpha and beta chain                        | 36621_at                | 1503       | ossification                                                     | 1.0         | -1.5        | 1.2         | 2.5         | -2.6        | -1.3        | -1.1         |
| D26443          | B        | glutamate transporter                                               | 36609_at                | 1504       | neurotransmitter uptake                                          | 1.1         | -1.2        | 1.2         | 1.6         | -1.4        | -1.4        | -2.5         |
| D30793          | A        | epiregulin                                                          | 34476_r_at              | 1525       | angiogenesis                                                     | -1.8        | 2.1         | 5.3         | 13.1        | 11.1        | 3.2         | 13.5         |
| U83509          | B        | angiopoietin-1, complete cds                                        | 1929_at                 | 1525       | angiogenesis                                                     | 1.0         | 1.6         | -1.3        | 1.0         | 1.0         | -2.8        | -5.4         |
| AF035121        | A        | KDR/Flk-1 protein                                                   | 1954_at                 | 1525       | angiogenesis                                                     | 1.4         | -1.7        | 1.0         | -1.1        | -4.3        | -3.6        | -2.9         |
| AF024710        | A        | vascular endothelial growth factor (VE)                             | 1953_at                 | 1525       | angiogenesis                                                     | 1.4         | -1.3        | 1.0         | 1.8         | 1.4         | 1.1         | 5.8          |
| U43142          | A        | vascular endothelial growth factor related protein                  | 159_at                  | 1525       | angiogenesis                                                     | 2.7         | -2.3        | -2.0        | 1.3         | 1.5         | 1.2         | 3.3          |





| GenBank       |          |                                                       | Affymetrix       |             |                               | Fold Change |             |             |             |             |             |            |
|---------------|----------|-------------------------------------------------------|------------------|-------------|-------------------------------|-------------|-------------|-------------|-------------|-------------|-------------|------------|
| Accession #   | Group    | Affymetric Gene Annotation                            | Probe set id     | GO id       | GO Biological Process         | 0           | 4           | 6           | 8           | 12          | 16          | 24         |
| X78947        | A        | connective tissue growth factor                       | 36638_at         | 6259        | DNA metabolism                | -1.4        | 1.1         | -1.1        | 3.0         | 4.2         | 2.7         | 4.4        |
| D87448        | A        | KIAA0259                                              | 38834_at         | 6259        | DNA metabolism                | 1.2         | -1.2        | 1.0         | -1.1        | 1.6         | 1.3         | 2.8        |
| L47276        | A        | (cell line HL-60) alpha topoisomerase II (top2)       | 904_s_at         | 6259        | DNA metabolism                | -1.1        | 1.7         | -1.8        | 1.2         | 2.4         | 5.2         | 7.9        |
| J04088        | A        | DNA topoisomerase II (top2)                           | 1592_at          | 6259        | DNA metabolism                | 1.6         | 1.0         | -1.5        | 1.4         | 2.8         | 3.8         | 4.8        |
| M15205        | A        | thymidine kinase gene                                 | 910_at           | 6259        | DNA metabolism                | 3.3         | 1.6         | 1.8         | -1.4        | 2.1         | 2.6         | 3.9        |
| U28386        | A        | nuclear localization sequence receptor hSRP1alpha     | 40407_at         | 6259        | DNA metabolism                | 1.3         | 1.2         | -2.3        | 1.2         | 1.7         | 2.3         | 3.5        |
| X55740        | A        | placental cDNA coding 5nucleotidase (EC 3.1.3.5)      | 31886_at         | 6259        | DNA metabolism                | 1.6         | 1.1         | 1.3         | 2.9         | 5.1         | 5.1         | 8.2        |
| K02581        | A        | thymidine kinase                                      | 41400_at         | 6259        | DNA metabolism                | 1.3         | 1.3         | 1.3         | -1.2        | 2.6         | 2.1         | 2.4        |
| L76937        | A        | Werner syndrome gene                                  | 38136_at         | 6259        | DNA metabolism                | 1.4         | 1.2         | 1.6         | 2.2         | 3.1         | -1.9        | 1.2        |
| AI375913      | A        | tct14c08.x1 cDNA                                      | 40145_at         | 6259        | DNA metabolism                | -1.3        | 1.0         | -5.0        | 1.4         | 1.9         | 4.9         | 5.9        |
| X83441        | A        | DNA ligase IV                                         | 963_at           | 6260        | DNA replication               | -1.2        | 1.1         | -1.1        | 2.4         | 2.6         | -1.1        | -1.3       |
| X74330        | A        | DNA primase (subunit p48)                             | 798_at           | 6260        | DNA replication               | -1.5        | -1.2        | 2.9         | 1.2         | 1.5         | 1.7         | 8.1        |
| X74331        | A        | DNA primase (subunit p58)                             | 122_at           | 6260        | DNA replication               | 1.1         | 1.0         | 1.0         | 1.5         | 3.0         | 3.1         | 1.9        |
| D38073        | A        | hRif beta subunit (p102 protein)                      | 33252_at         | 6260        | DNA replication               | 1.8         | 1.0         | 1.8         | 1.1         | 3.3         | 3.7         | 4.3        |
| D84557        | A        | HsMcm6                                                | 40117_at         | 6260        | DNA replication               | 1.1         | -1.1        | 1.1         | 1.5         | 2.4         | 3.2         | 3.2        |
| D21063        | A        | KIAA0030                                              | 35312_at         | 6260        | DNA replication               | 1.1         | -1.5        | -1.1        | -1.3        | 2.2         | 1.8         | 3.1        |
| D26018        | A        | KIAA0039                                              | 37646_at         | 6260        | DNA replication               | -1.5        | 3.0         | 1.1         | 1.2         | 2.4         | 3.2         | 2.7        |
| X59543        | A        | M1 subunit of ribonucleotide reductase                | 34314_at         | 6260        | DNA replication               | 1.7         | 1.4         | -2.5        | 1.7         | 3.3         | 5.4         | 3.2        |
| D55716        | A        | P1cdc47                                               | 947_at           | 6260        | DNA replication               | 1.6         | -1.2        | 1.0         | -1.2        | 2.4         | 2.8         | 5.1        |
| Z97029        | A        | ribonuclease H I large subunit                        | 35141_at         | 6260        | DNA replication               | 1.5         | -2.4        | 1.7         | -2.2        | 1.2         | 2.9         | 2.7        |
| <b>U39817</b> | <b>A</b> | <b>Bloom s syndrome protein (BLM)</b>                 | <b>1544_at</b>   | <b>6260</b> | <b>DNA replication</b>        | <b>-3.3</b> | <b>-1.4</b> | <b>1.8</b>  | <b>-2.6</b> | <b>13.2</b> | <b>11.8</b> | <b>4.7</b> |
| M15796        | A        | cyclin protein gene                                   | 1884_s_at        | 6260        | DNA replication               | 1.3         | 1.0         | -1.4        | 1.0         | 1.7         | 3.2         | 1.7        |
| J05614        | A        | proliferating cell nuclear antigen (PCNA)             | 1824_s_at        | 6260        | DNA replication               | 1.4         | 1.1         | 1.1         | 1.2         | 2.0         | 3.0         | 1.2        |
| L07540        | A        | replication factor C, 36-kDa subunit                  | 38863_at         | 6260        | DNA replication               | -1.2        | 1.1         | -2.8        | 1.6         | 1.4         | 11.7        | 1.4        |
| X82554        | B        | SFAR gene cyclin-related protein                      | 1695_at          | 6260        | DNA replication               | 1.0         | 1.2         | -1.2        | 1.1         | -1.2        | 1.1         | -3.9       |
| <b>U43746</b> | <b>A</b> | <b>breast cancer susceptibility (BRCA2)</b>           | <b>1989_at</b>   | <b>6260</b> | <b>DNA replication</b>        | <b>-2.3</b> | <b>1.3</b>  | <b>1.6</b>  | <b>-1.3</b> | <b>1.6</b>  | <b>3.2</b>  | <b>6.7</b> |
| U20979        | A        | chromatin assembly factor-I p150 subunit              | 32589_at         | 6260        | DNA replication               | 1.1         | -1.4        | -1.2        | -2.0        | 2.7         | 3.9         | 3.1        |
| U20980        | A        | chromatin assembly factor-I p60 subunit               | 36912_at         | 6260        | DNA replication               | 3.2         | -1.1        | 1.2         | -2.2        | 9.3         | 5.6         | 3.6        |
| AC004770      | A        | chromosome 11, BAC CIT-HSP-311e8 (BC269730)           | 41583_at         | 6260        | DNA replication               | 1.3         | 1.3         | 1.1         | 1.2         | 5.9         | 5.6         | 2.9        |
| AF025840      | A        | DNA polymerase epsilon subunit B (DPE2)               | 41085_at         | 6260        | DNA replication               | -1.2        | 1.0         | -2.0        | -1.2        | 3.9         | 3.0         | 3.5        |
| AJ223728      | A        | Porc-PI gene similar to yeast CDC45                   | 37458_at         | 6260        | DNA replication               | -4.3        | -1.3        | 1.0         | 1.7         | 6.7         | 14.0        | 8.7        |
| M87339        | A        | replication factor C, 37-kDa subunit                  | 1055_g_at        | 6260        | DNA replication               | -1.5        | 1.4         | 1.5         | 1.6         | 4.8         | 5.1         | 5.5        |
| L07541        | A        | replication factor C, 38-kDa subunit                  | 39269_at         | 6260        | DNA replication               | 1.2         | -1.2        | -1.6        | 1.2         | 3.4         | 2.8         | 5.6        |
| M87338        | A        | replication factor C, 40-kDa subunit (A1)             | 1053_at          | 6260        | DNA replication               | 1.0         | -1.1        | -1.6        | 1.5         | 2.2         | 2.7         | 2.5        |
| X59618        | A        | RR2 small subunit ribonucleotide reductase            | 36922_at         | 6260        | DNA replication               | -1.1        | 1.7         | -2.6        | 1.1         | 2.1         | 3.5         | 4.9        |
| M62810        | A        | mitochondrial transcription factor 1                  | 36191_at         | 6261        | DNA dependent DNA replication | 1.6         | 1.3         | 1.1         | 3.0         | 2.1         | 2.2         | 3.5        |
| W74442        | A        | zd75e09.s1 cDNA                                       | 32617_at         | 6261        | DNA dependent DNA replication | -1.7        | 1.3         | -1.3        | -2.4        | 2.6         | 15.7        | 7.7        |
| L47276        | A        | (cell line HL-60) alpha topoisomerase II (top2)       | 904_s_at         | 6265        | DNA topological change        | -1.1        | 1.7         | -1.8        | 1.2         | 2.4         | 5.2         | 7.9        |
| J04088        | A        | DNA topoisomerase II (top2)                           | 1592_at          | 6265        | DNA topological change        | 1.6         | 1.0         | -1.5        | 1.4         | 2.8         | 3.8         | 4.8        |
| U07806        | A        | camptothecin resistant clone CEM/C2 DNA topoisomerase | 1030_s_at        | 6265        | DNA topological change        | 1.0         | -1.1        | 1.6         | 2.7         | 1.7         | 1.8         | 2.3        |
| U07804        | A        | DNA topoisomerase I                                   | 1710_s_at        | 6265        | DNA topological change        | 1.3         | -1.2        | 1.7         | 2.6         | 1.7         | 1.2         | 2.6        |
| AI375913      | A        | tct14c08.x1 cDNA                                      | 40145_at         | 6265        | DNA topological change        | 1.3         | 1.0         | -5.0        | 1.4         | 1.9         | 4.9         | 5.9        |
| AF052148      | A        | clone 24507 sequence                                  | 32274_r_at       | 6266        | DNA ligation                  | -1.3        | -1.1        | 3.4         | -1.1        | 1.7         | 1.2         | -1.5       |
| U07806        | A        | camptothecin resistant clone CEM/C2 DNA topoisomerase | 1030_s_at        | 6268        | DNA unwinding                 | 1.0         | -1.1        | 1.6         | 2.7         | 1.7         | 1.8         | 2.3        |
| U07804        | A        | DNA topoisomerase I                                   | 1710_s_at        | 6268        | DNA unwinding                 | 1.3         | -1.2        | 1.7         | 2.6         | 1.7         | 1.2         | 2.6        |
| X74330        | A        | DNA primase (subunit p48)                             | 798_at           | 6269        | DNA replication, priming      | -1.5        | -1.2        | 2.9         | 1.2         | 1.5         | 1.7         | 8.1        |
| X74331        | A        | DNA primase (subunit p58)                             | 122_at           | 6269        | DNA replication, priming      | 1.1         | 1.0         | 1.0         | 1.5         | 3.0         | 3.1         | 1.9        |
| D38073        | A        | hRif beta subunit (p102 protein)                      | 33252_at         | 6270        | DNA replication initiation    | 1.8         | 1.0         | 1.8         | 1.1         | 3.3         | 3.7         | 4.3        |
| D84557        | A        | HsMcm6                                                | 40117_at         | 6270        | DNA replication initiation    | 1.1         | -1.1        | 1.1         | 1.5         | 2.4         | 3.2         | 3.2        |
| D21063        | A        | KIAA0030                                              | 35312_at         | 6270        | DNA replication initiation    | 1.1         | -1.5        | -1.1        | -1.3        | 2.2         | 1.8         | 3.1        |
| AJ223728      | A        | Porc-PI gene similar to yeast CDC45                   | 37458_at         | 6270        | DNA replication initiation    | -4.3        | -1.3        | 1.0         | 1.7         | 6.7         | 14.0        | 8.7        |
| M87339        | A        | replication factor C, 37-kDa subunit                  | 1055_g_at        | 6271        | DNA strand elongation         | 1.2         | 1.1         | -1.4        | 1.0         | 1.6         | 2.2         | 3.5        |
| L07541        | A        | replication factor C, 38-kDa subunit                  | 39269_at         | 6271        | DNA strand elongation         | 1.2         | -1.2        | -1.6        | 1.2         | 3.4         | 2.8         | 5.6        |
| M15796        | A        | cyclin protein gene                                   | 1884_s_at        | 6275        | regulation of DNA replication | 1.3         | 1.0         | -1.4        | 1.0         | 1.7         | 3.2         | 1.7        |
| J05614        | A        | proliferating cell nuclear antigen (PCNA)             | 1824_s_at        | 6275        | regulation of DNA replication | 1.4         | 1.1         | 1.1         | 1.2         | 2.0         | 3.0         | 1.2        |
| M68520        | A        | cdc2-related protein kinase                           | 1792_g_at        | 6275        | regulation of DNA replication | -1.1        | 1.3         | 1.5         | 1.5         | 2.1         | 2.6         | 1.4        |
| D37984        | A        | DNA helicase Q1                                       | 354_s_at         | 6281        | DNA repair                    | -1.9        | 1.1         | 1.0         | 1.1         | -1.2        | 1.6         | 2.6        |
| Y08837        | A        | RAD51-like protein (XRCC2)                            | 1300_at          | 6281        | DNA repair                    | 1.0         | -1.8        | -4.5        | 2.1         | 1.6         | 1.9         | 2.4        |
| AJ007669      | A        | Fanconi anemia group G                                | 37584_at         | 6281        | DNA repair                    | 1.7         | 1.5         | 1.0         | 1.0         | 1.3         | 2.2         | 2.7        |
| X97795        | A        | homologous to S. cerevisiae RAD54                     | 965_at           | 6281        | DNA repair                    | -1.2        | -1.2        | 1.3         | -1.3        | 1.8         | 1.9         | 2.9        |
| Y09008        | A        | uracil-DNA glycosylase                                | 37896_s_at       | 6281        | DNA repair                    | -1.3        | 1.1         | -1.1        | 1.0         | 1.9         | 2.8         | 1.4        |
| <b>U39817</b> | <b>A</b> | <b>Bloom s syndrome protein (BLM)</b>                 | <b>1544_at</b>   | <b>6281</b> | <b>DNA repair</b>             | <b>-3.3</b> | <b>-1.4</b> | <b>1.8</b>  | <b>-2.6</b> | <b>13.2</b> | <b>11.8</b> | <b>4.7</b> |
| <b>L78833</b> | <b>A</b> | <b>BRCA1, Rho7 and vatl genes</b>                     | <b>604_at</b>    | <b>6281</b> | <b>DNA repair</b>             | <b>-1.3</b> | <b>-3.1</b> | <b>-1.2</b> | <b>2.0</b>  | <b>23.1</b> | <b>4.7</b>  | <b>6.6</b> |
| M15796        | A        | cyclin protein gene                                   | 1884_s_at        | 6281        | DNA repair                    | 1.3         | 1.0         | -1.4        | 1.0         | 1.7         | 3.2         | 1.7        |
| <b>M60974</b> | <b>A</b> | <b>growth arrest and DNA-damage-inducible protein</b> | <b>1911_s_at</b> | <b>6281</b> | <b>DNA repair</b>             | <b>1.2</b>  | <b>1.1</b>  | <b>-1.2</b> | <b>2.1</b>  | <b>1.5</b>  | <b>1.6</b>  | <b>4.5</b> |
| J05614        | A        | proliferating cell nuclear antigen (PCNA)             | 1824_s_at        | 6281        | DNA repair                    | 1.4         | 1.1         | 1.1         | 1.2         | 2.0         | 3.0         | 1.2        |
| L07540        | A        | replication factor C, 36-kDa subunit                  | 38863_at         | 6281        | DNA repair                    | -1.2        | 1.1         | -2.8        | 1.6         | 1.4         | 11.7        | 1.4        |
| <b>U64805</b> | <b>A</b> | <b>BrcA1-delta11b (Brca1)</b>                         | <b>33724_at</b>  | <b>6281</b> | <b>DNA repair</b>             | <b>1.4</b>  | <b>-1.3</b> | <b>1.5</b>  | <b>1.4</b>  | <b>2.0</b>  | <b>2.0</b>  | <b>2.5</b> |
| U20979        | A        | chromatin assembly factor-I p150 subunit              | 32589_at         | 6281        | DNA repair                    | 1.1         | -1.4        | -1.2        | -2.0        | 2.7         | 3.9         | 3.1        |
| U20980        | A        | chromatin assembly factor-I p60 subunit               | 36912_at         | 6281        | DNA repair                    | 3.2         | -1.1        | 1.2         | -2.2        | 9.3         | 5.6         | 3.6        |
| U21915        | A        | chromosome 5q13.1 clone 5G8                           | 39494_at         | 6281        | DNA repair                    | 5.8         | -1.5        | -1.3        | 17.2        | 1.2         | 1.1         | 1.0        |
| AF020043      | A        | chromosome-associated polypeptide (HCAP)              | 34763_at         | 6281        | DNA repair                    | 1.1         | 1.5         | -1.1        | 2.2         | 1.8         | 1.7         | 3.0        |
| AF025840      | A        | DNA polymerase epsilon subunit B (DPE2)               | 41085_at         | 6281        | DNA repair                    | -1.2        | 1.0         | -2.0        | -1.2        | 3.9         | 3.0         | 3.5        |
| X66894        | A        | FACC from complementation group C (FA(C))             | 35713_at         | 6281        | DNA repair                    | -3.6        | 2.0         | 1.5         | 1.1         | 4.3         | 1.2         | 2.5        |
| U28455        | A        | phosphatidylinositol 3-kinase homolog (ATM)           | 2000_at          | 6281        | DNA repair                    | 1.5         | 1.3         | 1.0         | 1.6         | -1.5        | -2.5        | 1.4        |
| U72936        | A        | putative DNA dependent ATPase and helicase (ATRX)     | 39146_at         | 6281        | DNA repair                    | 1.2         | 7.7         | 1.2         | 1.9         | 4.2         | 1.9         | -1.7       |
| AF029670      | A        | Rad51C truncated protein (RAD51C)                     | 41479_s_at       | 6281        | DNA repair                    | 1.4         | -1.2        | 1.5         | 1.7         | 1.0         | 2.7         | 1.3        |
| AF006259      | A        | Rad51-interacting protein                             | 35397_at         | 6281        | DNA repair                    | -1.4        | 2.8         | -1.5        | -1.3        | 1.0         | 4.3         | 3.9        |
| AB006532      | A        | RecQ4 DNA helicase                                    | 39651_at         | 6281        | DNA repair                    | -1.1        | 1.0         | -1.8        | -1.2        | -1.2        | 1.8         | 2.9        |

| GenBank     |       | Affymetrix                                             | Fold Change  |       |                                                            |      |      |       |      |      |      |      |
|-------------|-------|--------------------------------------------------------|--------------|-------|------------------------------------------------------------|------|------|-------|------|------|------|------|
| Accession # | Group | Affymetrix Gene Annotation                             | Probe set id | GO id | GO Biological Process                                      | 0    | 4    | 6     | 8    | 12   | 16   | 24   |
| AL043470    | A     | DKFZp434A0327_s1                                       | 33125_at     | 6281  | DNA repair                                                 | -1.5 | 1.2  | 1.0   | 1.7  | 1.7  | 2.5  | 2.9  |
| AI685944    | A     | tu38g02.x1_cDNA                                        | 34865_at     | 6281  | DNA repair                                                 | -1.8 | -1.4 | 1.1   | 1.6  | 1.2  | 1.2  | 3.2  |
| AF091754    |       | untitled                                               | 36041_at     | 6281  | DNA repair                                                 | 2.5  | -7.0 | 1.3   | 2.5  | 2.9  | 29.7 | 3.1  |
| L78833      | A     | BRCA1, Rho7 and vatt genes                             | 604_at       | 6282  | regulation of DNA repair                                   | -1.3 | -3.1 | -1.2  | 2.0  | 23.1 | 4.7  | 6.6  |
| U64805      | A     | Brca1-delta11b (Brca1)                                 | 33724_at     | 6282  | regulation of DNA repair                                   | 1.4  | -1.3 | 1.5   | 1.4  | 2.0  | 2.0  | 2.5  |
| L20046      |       | ERCC5 excision repair protein                          | 2063_at      | 6283  | transcription-coupled nucleotide-excision repair           | -1.6 | 1.4  | -3.9  | 1.3  | -1.2 | 1.5  | -1.4 |
| Y09008      |       | uracil-DNA glycosylase                                 | 37686_s_at   | 6284  | base-excision repair                                       | -1.3 | 1.1  | -1.1  | 1.0  | 1.9  | 2.8  | 1.5  |
| AF034956    |       | RAD51D                                                 | 37793_r_at   | 6284  | base-excision repair                                       | 2.1  | 1.3  | -1.1  | 2.9  | 2.0  | -1.3 | -1.1 |
| D27018      |       | KIAA0039                                               | 37946_at     | 6298  | mismatch repair                                            | -1.5 | 3.0  | 1.1   | 1.2  | 2.4  | 3.2  | 2.7  |
| U03911      | A     | mutator gene (hMSH2)                                   | 860_at       | 6298  | mismatch repair                                            | -1.3 | -1.2 | -1.3  | 2.0  | 3.4  | 4.3  | 2.2  |
| U03911      | A     | mutator gene (hMSH2)                                   | 861_g_at     | 6298  | mismatch repair                                            | 1.1  | -1.3 | -1.3  | 2.1  | 1.7  | 3.6  | 2.2  |
| AF091754    |       | untitled                                               | 36041_at     | 6298  | mismatch repair                                            | 2.5  | -7.0 | 1.3   | 2.5  | 2.9  | 29.7 | 3.1  |
| U03911      | A     | mutator gene (hMSH2)                                   | 860_at       | 6301  | postreplication repair                                     | -1.3 | 1.2  | 1.0   | 2.0  | 3.0  | 4.3  | 2.2  |
| U03911      | A     | mutator gene (hMSH2)                                   | 861_g_at     | 6301  | postreplication repair                                     | 1.1  | -1.3 | -1.3  | 2.1  | 1.7  | 3.6  | 2.2  |
| U47077      |       | DNA-dependent protein kinase catalytic subunit         | 1250_at      | 6302  | double-strand break repair                                 | 1.3  | 1.1  | -3.1  | -1.2 | 1.1  | 1.4  | 1.3  |
| AC004770    |       | chromosome 11, BAC CIT-HSP-311e8 (BC269730)            | 41583_at     | 6302  | double-strand break repair                                 | 1.3  | 1.3  | 1.1   | 1.2  | 5.9  | 5.6  | 2.9  |
| AF052148    |       | clone 24507 sequence                                   | 32274_r_at   | 6303  | double-strand break repair via nonhomologous end-joining   | -1.3 | -1.1 | 3.4   | -1.1 | -1.4 | 1.2  | -1.5 |
| V01512      | A     | cellular oncogene c-fos                                | 1916_s_at    | 6306  | DNA methylation                                            | -1.3 | 1.8  | 2.9   | 4.7  | 7.1  | 6.4  | 5.1  |
| V01512      | A     | cellular oncogene c-fos                                | 1915_s_at    | 6306  | DNA methylation                                            | 1.1  | 1.6  | 1.9   | 2.5  | 3.0  | 2.2  | 3.5  |
| U72936      |       | putative DNA dependent ATPase and helicase (ATRX)      | 39146_at     | 6306  | DNA methylation                                            | 1.2  | 7.7  | 1.2   | 1.9  | 4.2  | 1.9  | -1.7 |
| U75744      |       | DNase gamma 4                                          | 37972_at     | 6308  | DNA catabolism                                             | -1.5 | 1.2  | 1.3   | -1.7 | 1.0  | -3.1 | 1.5  |
| Y08837      |       | RAD51-like protein (XRCC2)                             | 1300_at      | 6310  | DNA recombination                                          | 1.0  | -1.8 | -4.5  | 2.1  | 1.6  | 1.9  | 2.4  |
| X83441      |       | DNA ligase IV                                          | 963_at       | 6310  | DNA recombination                                          | -1.2 | -1.1 | -1.1  | 2.4  | 2.6  | -1.1 | -1.3 |
| X97795      | A     | homologous to S. cerevisiae RAD54                      | 966_at       | 6310  | DNA recombination                                          | -1.2 | -1.2 | 1.3   | -1.3 | 1.8  | 1.9  | 2.9  |
| U39817      | A     | Bloom s syndrome protein (BLM)                         | 1544_at      | 6310  | DNA recombination                                          | -3.3 | -1.4 | 1.8   | -2.6 | 13.2 | 11.8 | 4.7  |
| U47077      |       | DNA-dependent protein kinase catalytic subunit         | 1250_at      | 6310  | DNA recombination                                          | -1.3 | 1.1  | -3.1  | -1.2 | 1.1  | 1.4  | 1.3  |
| U72936      |       | putative DNA dependent ATPase and helicase (ATRX)      | 39146_at     | 6310  | DNA recombination                                          | 1.2  | 7.7  | 1.2   | 1.9  | 4.2  | 1.9  | -1.7 |
| AF029670    |       | Rad51C truncated protein (RAD51C)                      | 41479_s_at   | 6310  | DNA recombination                                          | 1.4  | -1.2 | 1.5   | 1.7  | 1.0  | 2.7  | 1.3  |
| AF091754    |       | untitled                                               | 36041_at     | 6310  | DNA recombination                                          | 2.5  | -7.0 | 1.3   | 2.5  | 2.9  | 29.7 | 3.1  |
| M97856      | A     | P1-Cdc46                                               | 33255_at     | 6323  | DNA packaging                                              | 1.1  | 1.2  | 2.3   | -1.1 | 1.5  | 2.0  | 2.8  |
| AF030424    | A     | histone acetyltransferase 1                            | 41855_at     | 6323  | DNA packaging                                              | 1.4  | 1.0  | 1.3   | 1.4  | 1.5  | 2.6  | 3.9  |
| X92518      | A     | HMGIC                                                  | 35200_at     | 6325  | establishment and/or maintenance of chromatin architecture | -1.1 | 1.2  | 2.4   | 2.6  | 2.8  | 3.3  | 3.0  |
| U43746      | A     | breast cancer susceptibility (BRCA2)                   | 1989_at      | 6325  | establishment and/or maintenance of chromatin architecture | -2.3 | 1.3  | 1.6   | -1.3 | 1.6  | 3.2  | 6.7  |
| U61145      | A     | enhancer of zeste homolog 2 (EZH2)                     | 37305_at     | 6325  | establishment and/or maintenance of chromatin architecture | 1.0  | 1.0  | -1.4  | 1.4  | 1.9  | 3.4  | 3.5  |
| AF006513    | A     | CHD1                                                   | 39231_at     | 6333  | chromatin assembly/disassembly                             | -1.2 | 1.2  | 1.1   | 3.2  | 2.0  | 2.7  | 2.2  |
| D64142      |       | histone H1x                                            | 318_at       | 6334  | nucleosome assembly                                        | 2.1  | -1.3 | -1.3  | -5.6 | -1.6 | -2.0 | 6.4  |
| D64142      |       | histone H1x                                            | 319_g_at     | 6334  | nucleosome assembly                                        | 1.1  | -1.1 | -1.8  | -2.4 | -1.6 | -1.2 | 3.6  |
| AJ223352    | B     | histone H2B, clone pJG4-5-14                           | 32819_at     | 6334  | nucleosome assembly                                        | -1.3 | 1.2  | -1.3  | -1.2 | -1.3 | -2.8 | -1.6 |
| AJ223353    | B     | histone H2B, clone pJG4-5-15                           | 38576_at     | 6334  | nucleosome assembly                                        | -1.9 | 1.3  | -1.4  | 1.0  | -1.2 | -1.7 | -2.8 |
| AB018264    |       | KIAA0721                                               | 33835_at     | 6334  | nucleosome assembly                                        | 1.1  | 1.2  | -3.0  | -1.1 | 1.1  | -1.2 | -2.6 |
| X03473      | A     | gene histone H1(0)                                     | 434_at       | 6334  | nucleosome assembly                                        | 1.4  | -1.5 | 2.2   | -1.7 | 1.7  | 3.8  | 2.9  |
| X97985      | B     | histones H2B.1 and H2A                                 | 33352_at     | 6334  | nucleosome assembly                                        | -1.9 | -1.1 | -2.2  | -2.1 | -2.6 | -4.0 | -3.5 |
| X14885      |       | H2A.X encoding histone H2A.X                           | 40196_at     | 6334  | nucleosome assembly                                        | 4.1  | -1.5 | -1.3  | 2.0  | 1.0  | 0.0  | 2.0  |
| Z80780      | B     | H2B/h gene                                             | 31523_f_at   | 6334  | nucleosome assembly                                        | 1.1  | 1.5  | 1.6   | -1.2 | -1.4 | -1.5 | -2.6 |
| M37583      | A     | histone (H2A.Z)                                        | 39337_at     | 6334  | nucleosome assembly                                        | 1.4  | 1.3  | -2.6  | 1.3  | 1.8  | 2.6  | 2.6  |
| AB015345    |       | HRIHFB2216                                             | 40165_at     | 6334  | nucleosome assembly                                        | 1.0  | 1.0  | 1.2   | -1.3 | -1.4 | -2.6 | -1.6 |
| AL009179    | B     | dJ97D16.4 (Histone H2B)                                | 35576_f_at   | 6334  | nucleosome assembly                                        | -1.2 | 1.0  | 1.5   | -1.4 | -1.1 | -1.3 | -2.6 |
| AL009179    |       | dJ97D16.6 (Histone H3.1)                               | 36757_at     | 6334  | nucleosome assembly                                        | -1.4 | 2.2  | -1.4  | 1.1  | -2.5 | -2.6 | -2.7 |
| N35832      |       | yx89B10.r1_cDNA                                        | 34964_at     | 6334  | nucleosome assembly                                        | 5.3  | -1.1 | -2.2  | -3.9 | -5.4 | -5.7 | 1.8  |
| U20979      | A     | chromatin assembly factor-I p150 subunit               | 32589_at     | 6335  | DNA replication dependent nucleosome assembly              | 1.1  | -1.4 | -1.2  | -2.0 | 2.7  | 3.9  | 3.1  |
| U20980      | A     | chromatin assembly factor-I p60 subunit                | 36912_at     | 6335  | DNA replication dependent nucleosome assembly              | 3.2  | -1.1 | 1.2   | -2.2 | 9.3  | 5.6  | 3.6  |
| AF041474    |       | BAF53a                                                 | 41278_at     | 6338  | chromatin modeling                                         | 1.1  | 1.6  | -1.7  | 2.7  | 2.0  | 2.2  | 1.8  |
| U43746      | A     | breast cancer susceptibility (BRCA2)                   | 1989_at      | 6338  | chromatin modeling                                         | -2.3 | 1.3  | 1.6   | -1.3 | 1.6  | 3.2  | 6.7  |
| AF001294    | A     | IPL (IPL)                                              | 31888_s_at   | 6349  | imprinting                                                 | -1.3 | 1.5  | 1.2   | 1.7  | 2.3  | 2.7  | 1.8  |
| X84373      | A     | nuclear factor RIP140                                  | 40088_at     | 6350  | transcription                                              | -1.1 | 1.2  | 1.1   | 4.0  | 2.1  | 1.6  | 3.7  |
| X76770      |       | PAP                                                    | 34855_at     | 6350  | transcription                                              | -1.3 | 1.7  | -1.4  | 1.2  | 1.9  | 3.0  | 2.1  |
| W37606      |       | zct12a03.r1_cDNA                                       | 41495_at     | 6350  | transcription                                              | 3.0  | 1.5  | -3.0  | 2.6  | 1.5  | 1.8  | 1.1  |
| Y09615      |       | mitochondrial transcription termination factor         | 41070_r_at   | 6353  | transcription termination                                  | -1.8 | 1.8  | -29.0 | 2.6  | 1.1  | 1.6  | -1.5 |
| X13293      |       | B-myb gene                                             | 1854_at      | 6355  | regulation of transcription, DNA-dependent                 | 2.2  | -1.3 | 1.0   | 1.1  | 3.1  | 1.3  | 2.6  |
| D45132      |       | zinc-finger DNA-binding protein AND-1 protein          | 315_at       | 6355  | regulation of transcription, DNA-dependent                 | 1.1  | 1.2  | 1.2   | 1.5  | 1.4  | 2.5  | 1.2  |
| AJ006266    |       | EAR-1r                                                 | 40355_at     | 6355  | regulation of transcription, DNA-dependent                 | 1.0  | -1.5 | 2.2   | 1.1  | 4.4  | 21.0 | 2.5  |
| D16815      |       | GC-Box binding protein BTEB2                           | 35705_at     | 6355  | regulation of transcription, DNA-dependent                 | 1.1  | -1.1 | 10.2  | 2.8  | 1.2  | 1.3  | 1.2  |
| D14520      |       | GC-Box binding protein BTEB2                           | 37926_at     | 6355  | regulation of transcription, DNA-dependent                 | -1.3 | 1.3  | 2.6   | 1.6  | 1.2  | 1.2  | 1.3  |
| X92518      | A     | HMGIC                                                  | 35200_at     | 6355  | regulation of transcription, DNA-dependent                 | -1.1 | 1.2  | 2.4   | 2.6  | 2.8  | 3.3  | 3.0  |
| D38073      | A     | hRif beta subunit (p102 protein)                       | 33252_at     | 6355  | regulation of transcription, DNA-dependent                 | 1.8  | 1.0  | 1.8   | 1.1  | 3.3  | 3.7  | 4.3  |
| D84557      | A     | HsMcm6                                                 | 40117_at     | 6355  | regulation of transcription, DNA-dependent                 | 1.1  | -1.1 | 1.1   | 1.5  | 2.4  | 3.2  | 3.2  |
| Y07707      |       | ITBA4 gene                                             | 37501_at     | 6355  | regulation of transcription, DNA-dependent                 | 1.2  | -1.3 | 1.2   | 3.0  | 1.1  | 1.0  | 1.6  |
| D21063      | A     | KIAA0030                                               | 35312_at     | 6355  | regulation of transcription, DNA-dependent                 | 1.1  | -1.5 | -1.1  | -1.3 | 2.2  | 1.8  | 3.1  |
| D63881      | A     | KIAA0160                                               | 40957_at     | 6355  | regulation of transcription, DNA-dependent                 | 1.3  | 1.1  | -1.2  | 2.3  | 1.7  | 2.6  | 2.7  |
| AB011141    |       | KIAA0569                                               | 35681_r_at   | 6355  | regulation of transcription, DNA-dependent                 | 1.2  | -2.8 | 1.0   | 1.5  | -1.5 | -1.3 | -1.3 |
| AB020634    |       | KIAA0827                                               | 40713_at     | 6355  | regulation of transcription, DNA-dependent                 | 1.5  | 6.0  | 11.7  | 1.9  | 1.6  | 6.1  | -2.4 |
| AB020936    |       | KIAA1113                                               | 32635_at     | 6355  | regulation of transcription, DNA-dependent                 | -1.1 | 1.8  | -6.6  | 3.3  | 1.0  | 2.9  | 2.1  |
| AJ132917    |       | methyl-CpG-binding protein 2                           | 34355_at     | 6355  | regulation of transcription, DNA-dependent                 | 1.3  | 1.5  | -3.4  | -1.2 | 1.2  | 1.2  | 1.1  |
| D82344      |       | NBPhox                                                 | 35020_at     | 6355  | regulation of transcription, DNA-dependent                 | -2.2 | 1.1  | 2.3   | 12.0 | -1.5 | -2.7 | 1.7  |
| X84373      | A     | nuclear factor RIP140                                  | 40088_at     | 6355  | regulation of transcription, DNA-dependent                 | -1.1 | 1.2  | 1.1   | 4.0  | 2.1  | 1.6  | 3.7  |
| Z50194      | A     | PQ-rich protein                                        | 36239_at     | 6355  | regulation of transcription, DNA-dependent                 | 1.2  | 1.0  | 11.2  | 12.9 | 3.8  | 9.4  | 42.4 |
| X16901      | A     | RAP30 subunit of transcription initiation factor RAP30 | 36510_at     | 6355  | regulation of transcription, DNA-dependent                 | -1.2 | -1.1 | -1.4  | 2.1  | 1.5  | 2.0  | 2.5  |
| X97674      | B     | transcriptional intermediary factor 2                  | 34313_at     | 6355  | regulation of transcription, DNA-dependent                 | 2.3  | 1.6  | -1.1  | -1.5 | -1.5 | -1.3 | -2.5 |
| X16281      |       | zinc finger protein                                    | 35408_i_at   | 6355  | regulation of transcription, DNA-dependent                 | -1.9 | -6.7 | -2.4  | -1.3 | -2.7 | -1.4 | -1.7 |

| GenBank     | Group | Affymetric Gene Annotation                                              | Affymatrix       | GO id       | GO Biological Process                                   |             | Fold Change |             |            |             |             |             |  |
|-------------|-------|-------------------------------------------------------------------------|------------------|-------------|---------------------------------------------------------|-------------|-------------|-------------|------------|-------------|-------------|-------------|--|
| Accession # | Group |                                                                         | Probe set id     |             |                                                         | 0           | 4           | 6           | 8          | 12          | 16          | 24          |  |
| X16281      | B     | zinc finger protein (clone 431)                                         | 35409_r_at       | 6355        | regulation of transcription, DNA-dependent              | 4.5         | -1.4        | -2.3        | -1.2       | -1.9        | -3.0        | -10.9       |  |
| L19871      | A     | activating transcription factor 3 (ATF3)                                | 287_at           | 6355        | regulation of transcription, DNA-dependent              | -2.1        | -1.4        | 2.0         | -2.7       | -2.1        | -1.5        | 3.2         |  |
| X66087      | A     | a-myb                                                                   | 160043_at        | 6355        | regulation of transcription, DNA-dependent              | 1.1         | 1.5         | 2.7         | -1.3       | 27.3        | 3.9         | 2.4         |  |
| M37197      | A     | CCAAT-box-binding factor (CBF)                                          | 229_at           | 6355        | regulation of transcription, DNA-dependent              | -1.4        | -1.4        | 1.0         | 3.5        | 1.4         | 2.0         | 2.3         |  |
| U69196      | A     | cDNA  clone=198754                                                      | 38288_at         | 6355        | regulation of transcription, DNA-dependent              | -1.4        | 1.7         | 1.0         | 2.1        | 1.3         | 1.7         | 3.5         |  |
| U59913      | A     | chromosome 5 Mad homolog Smad5                                          | 1013_at          | 6355        | regulation of transcription, DNA-dependent              | -1.4        | 1.5         | 1.2         | 2.4        | -1.1        | 3.3         | 1.4         |  |
| L12701      | A     | enraged protein (EN2) gene                                              | 1133_at          | 6355        | regulation of transcription, DNA-dependent              | 4.1         | -2.0        | 1.5         | 2.6        | -2.5        | 1.0         | -1.2        |  |
| AF010193    | A     | MAD-related gene SMAD7 (SMAD7)                                          | 1857_at          | 6355        | regulation of transcription, DNA-dependent              | 1.2         | -2.0        | 1.2         | 1.1        | -1.1        | -1.1        | 3.7         |  |
| Z33274      | A     | PEBP2aC1 acute myeloid leukaemia                                        | 106_at           | 6355        | regulation of transcription, DNA-dependent              | -1.6        | -1.2        | -2.9        | 1.4        | 1.5         | 7.9         | 1.4         |  |
| M07915      | A     | retinoic acid-binding protein II                                        | 1057_at          | 6355        | regulation of transcription, DNA-dependent              | -1.2        | -1.1        | 1.0         | -1.2       | -1.4        | -4.3        | -2.9        |  |
| M27891      | A     | transactivator protein (CREB)                                           | 37535_at         | 6355        | regulation of transcription, DNA-dependent              | 3.0         | 1.3         | -1.3        | 1.8        | -1.1        | -1.1        | 1.8         |  |
| M99701      | B     | (pp21)                                                                  | 38317_at         | 6355        | regulation of transcription, DNA-dependent              | -1.2        | -1.3        | -1.1        | 1.3        | -1.5        | -1.3        | -3.2        |  |
| L19872      | A     | AH-receptor                                                             | 40516_at         | 6355        | regulation of transcription, DNA-dependent              | 1.4         | -1.8        | -1.2        | 1.9        | 1.3         | 1.4         | 3.2         |  |
| AB002803    | A     | BACH1                                                                   | 31895_at         | 6355        | regulation of transcription, DNA-dependent              | 1.1         | -1.1        | 1.9         | 2.8        | 2.6         | 2.3         | 2.1         |  |
| U20240      | A     | C/EBP gamma                                                             | 39219_at         | 6355        | regulation of transcription, DNA-dependent              | 1.1         | -1.3        | -1.2        | 1.3        | -1.2        | 1.1         | 2.9         |  |
| M37197      | A     | CCAAT-box-binding factor (CBF)                                          | 32194_at         | 6355        | regulation of transcription, DNA-dependent              | -1.3        | 1.0         | -1.1        | 2.8        | 1.4         | 1.1         | 2.1         |  |
| AF017257    | B     | chromosome 21 derived BAC                                               | 38739_at         | 6355        | regulation of transcription, DNA-dependent              | -1.1        | -1.1        | -2.6        | -2.1       | -2.4        | -2.5        | -2.8        |  |
| U59913      | A     | chromosome 5 Mad homolog Smad5                                          | 39926_at         | 6355        | regulation of transcription, DNA-dependent              | 1.7         | 1.1         | -1.5        | 1.5        | -1.1        | 3.3         | 1.2         |  |
| U21915      | A     | chromosome 5q13.1 clone 5G8                                             | 39494_at         | 6355        | regulation of transcription, DNA-dependent              | 5.8         | -1.5        | -1.3        | 17.2       | 1.2         | 1.1         | 1.0         |  |
| AF052094    | A     | clone 23698 sequence                                                    | 38092_at         | 6355        | regulation of transcription, DNA-dependent              | 1.1         | 8.7         | -4.9        | 1.1        | -1.2        | 1.1         | -1.4        |  |
| AF070641    | A     | clone 24421 sequence                                                    | 37156_at         | 6355        | regulation of transcription, DNA-dependent              | 4.7         | -1.5        | 3.3         | 2.5        | 7.1         | 3.4         | 93.3        |  |
| AF070578    | A     | clone 24674 sequence                                                    | 36758_at         | 6355        | regulation of transcription, DNA-dependent              | 1.7         | -2.7        | 1.6         | 1.4        | 3.4         | 1.1         | -1.8        |  |
| AL049381    | B     | DKFZp586J2118                                                           | 33355_at         | 6355        | regulation of transcription, DNA-dependent              | 1.3         | -1.1        | 1.4         | -2.3       | 1.0         | -1.7        | -3.2        |  |
| AL031985    | A     | DNA sequence from clone Z28H13 on chromosome 1p34.1-35.3                | 35557_at         | 6355        | regulation of transcription, DNA-dependent              | 1.1         | -1.1        | 4.1         | 2.8        | -1.4        | 1.1         | 40.9        |  |
| Z39330      | A     | DNA sequence from clone Z92E10 on chromosome 22q11-12                   | 39765_at         | 6355        | regulation of transcription, DNA-dependent              | -1.1        | -1.2        | 1.1         | 1.6        | 1.1         | 2.9         | 4.3         |  |
| Z39330      | A     | DNA sequence from clone Z92E10 on chromosome 22q11-12                   | 39756_g_at       | 6355        | regulation of transcription, DNA-dependent              | -1.1        | -1.1        | 1.4         | 1.3        | 1.4         | 1.6         | 2.7         |  |
| AL031666    | A     | DNA sequence from clone 569M23 on chromosome 20q12-13.1                 | 37115_at         | 6355        | regulation of transcription, DNA-dependent              | 4.6         | 1.5         | 1.4         | 1.3        | -1.4        | -2.8        | 2.4         |  |
| U81984      | A     | endothelial PAS domain protein 1 (EPAS1)                                | 38230_at         | 6355        | regulation of transcription, DNA-dependent              | -1.1        | -1.1        | 3.1         | -1.5       | -1.4        | -1.2        | -1.8        |  |
| U61145      | A     | enhancer of zeste homolog 2 (EZH2)                                      | 37305_at         | 6355        | regulation of transcription, DNA-dependent              | 1.0         | 1.0         | -1.4        | 1.4        | 1.9         | 3.4         | 3.5         |  |
| X96381      | A     | erm gene                                                                | 34818_at         | 6355        | regulation of transcription, DNA-dependent              | 1.2         | 1.2         | 1.3         | 3.3        | 4.8         | 8.0         | 14.2        |  |
| U13220      | A     | Forkhead protein FREAC-2                                                | 36319_at         | 6355        | regulation of transcription, DNA-dependent              | 1.1         | -1.1        | 1.4         | 1.0        | 2.6         | 1.6         | 2.8         |  |
| M95585      | A     | hepatic leukemia factor (HLF)                                           | 38627_at         | 6355        | regulation of transcription, DNA-dependent              | -2.0        | 1.9         | -6.5        | 3.2        | -1.1        | -3.6        | 1.3         |  |
| U39840      | A     | hepatocyte nuclear factor-3 alpha (HNF-3 alpha)                         | 37141_at         | 6355        | regulation of transcription, DNA-dependent              | -1.7        | 1.2         | 4.3         | 2.7        | 2.8         | 1.5         | 1.3         |  |
| U74612      | A     | hepatocyte nuclear factor-3/k head homolog 11A (HFH-11A)                | 34715_at         | 6355        | regulation of transcription, DNA-dependent              | 1.8         | -1.1        | 1.4         | 1.1        | 2.3         | 2.4         | 4.2         |  |
| X62534      | A     | HMG-2                                                                   | 38065_at         | 6355        | regulation of transcription, DNA-dependent              | 1.6         | 1.5         | -2.2        | 1.3        | 2.6         | 5.8         | 11.1        |  |
| AB028021    | A     | <b>HNF-3beta hepatocyte nuclear factor-3 beta</b>                       | <b>40284_at</b>  | <b>6355</b> | <b>regulation of transcription, DNA-dependent</b>       | <b>1.7</b>  | <b>1.6</b>  | <b>9.3</b>  | <b>1.9</b> | <b>13.5</b> | <b>14.5</b> | <b>18.2</b> |  |
| AB012853    | A     | ING1L ING1p                                                             | 39555_at         | 6355        | regulation of transcription, DNA-dependent              | 1.0         | 1.3         | 1.8         | 1.0        | 6.0         | 1.4         | 3.6         |  |
| U90304      | B     | iroquois-class homeodomain protein IRX-2a                               | 41348_at         | 6355        | regulation of transcription, DNA-dependent              | 1.1         | -1.4        | -1.1        | -1.6       | -1.8        | -2.8        | -2.5        |  |
| AB007872    | A     | KIAA0412                                                                | 41612_at         | 6355        | regulation of transcription, DNA-dependent              | 1.0         | 1.8         | 1.0         | -1.4       | 1.5         | -2.8        | -1.6        |  |
| AB007901    | A     | KIAA0441                                                                | 39658_at         | 6355        | regulation of transcription, DNA-dependent              | -1.3        | 1.0         | 1.6         | 2.8        | 2.3         | 1.2         | 1.0         |  |
| AF064094    | A     | KL4Fp                                                                   | 37789_at         | 6355        | regulation of transcription, DNA-dependent              | -6.4        | -1.5        | -2.0        | -1.4       | 1.6         | -1.2        | 3.2         |  |
| U13044      | A     | nuclear respiratory factor-2 subunit alpha                              | 37245_at         | 6355        | regulation of transcription, DNA-dependent              | -1.2        | -1.5        | 1.6         | -1.3       | -1.5        | 7.0         | 1.4         |  |
| U13045      | A     | nuclear respiratory factor-2 subunit beta 1                             | 37275_at         | 6355        | regulation of transcription, DNA-dependent              | -3.0        | -1.2        | -1.2        | 1.2        | 1.7         | -1.3        | 2.5         |  |
| AC004079    | A     | PAC clone DJ0167F23 from 7p15                                           | 33577_at         | 6355        | regulation of transcription, DNA-dependent              | 1.3         | 1.4         | 1.3         | 1.1        | 1.2         | -2.7        | -1.3        |  |
| X63741      | A     | pilot                                                                   | 40375_at         | 6355        | regulation of transcription, DNA-dependent              | 1.2         | -1.2        | -1.2        | 4.1        | 32.3        | 1.0         | 1.5         |  |
| U44754      | A     | PSE-binding factor PTF gamma subunit                                    | 35488_at         | 6355        | regulation of transcription, DNA-dependent              | -1.1        | 1.1         | -1.2        | 2.7        | 1.7         | 1.9         | 1.9         |  |
| U72936      | A     | putative DNA dependent ATPase and helicase (ATR)                        | 39146_at         | 6355        | regulation of transcription, DNA-dependent              | 1.2         | 7.7         | 1.2         | 1.9        | 4.2         | 1.9         | -1.7        |  |
| M97815      | B     | retinoic acid-binding protein II (CRABP-II)                             | 41783_at         | 6355        | regulation of transcription, DNA-dependent              | -1.7        | -1.3        | 1.0         | -1.7       | -2.7        | -3.5        | -3.0        |  |
| Y18264      | A     | SALL1                                                                   | 32985_at         | 6355        | regulation of transcription, DNA-dependent              | -2.4        | 1.4         | -2.0        | 2.1        | -1.6        | 2.0         | 3.2         |  |
| AF055376    | B     | short m transcription factor C-MAF (c-maf)                              | 41505_r_at       | 6355        | regulation of transcription, DNA-dependent              | -1.4        | 1.8         | -4.0        | -2.1       | -2.3        | -6.2        | -17.5       |  |
| AF055376    | B     | short m transcription factor C-MAF (c-maf)                              | 41504_s_at       | 6355        | regulation of transcription, DNA-dependent              | -1.6        | 2.7         | -7.1        | -3.3       | -2.4        | -5.8        | -6.7        |  |
| L10910      | A     | splicing factor (CC1.3)                                                 | 39725_at         | 6355        | regulation of transcription, DNA-dependent              | 1.2         | 1.1         | 1.1         | 2.3        | -1.1        | 1.7         | 2.7         |  |
| L40411      | A     | thyroid receptor interactor (TRIP8)                                     | 38216_at         | 6355        | regulation of transcription, DNA-dependent              | 1.9         | -1.1        | -1.3        | 1.4        | -1.1        | -1.5        | 2.7         |  |
| U31556      | A     | <b>transcription factor E2F-5</b>                                       | <b>1044_s_at</b> | <b>6355</b> | <b>regulation of transcription, DNA-dependent</b>       | <b>-1.2</b> | <b>-1.1</b> | <b>2.2</b>  | <b>2.8</b> | <b>2.0</b>  | <b>2.2</b>  | <b>3.4</b>  |  |
| U31556      | A     | <b>transcription factor E2F-5</b>                                       | <b>41275_at</b>  | <b>6355</b> | <b>regulation of transcription, DNA-dependent</b>       | <b>-1.3</b> | <b>-1.3</b> | <b>2.5</b>  | <b>2.4</b> | <b>1.4</b>  | <b>1.7</b>  | <b>3.3</b>  |  |
| U59831      | A     | transcription factor, khead related activator 4 (FREAC-4)               | 33203_s_at       | 6355        | regulation of transcription, DNA-dependent              | -1.1        | 2.0         | -1.2        | 1.8        | 1.2         | -2.3        | 3.1         |  |
| U78722      | A     | zinc finger protein 165 (Zfp165)                                        | 33572_at         | 6355        | regulation of transcription, DNA-dependent              | -1.7        | -1.1        | -1.4        | 1.0        | 1.4         | 1.0         | 3.1         |  |
| AF027219    | A     | ZNF202 beta (ZNF202)                                                    | 38302_at         | 6355        | regulation of transcription, DNA-dependent              | -1.4        | -1.2        | -1.2        | 3.3        | -1.3        | -1.5        | 2.6         |  |
| AL021977    | A     | 7C4.1 novel MAFF (v-maf musculoaponeurotic fibrosarcoma) (v-maf)        | 36711_at         | 6355        | regulation of transcription, DNA-dependent              | -1.1        | 1.4         | 5.2         | 4.8        | 6.0         | 9.9         | 13.8        |  |
| AL022328    | B     | dJ1042K10.3 (novel protein)                                             | 35563_at         | 6355        | regulation of transcription, DNA-dependent              | 1.0         | 1.2         | 1.0         | -6.2       | -2.0        | -3.2        | -2.1        |  |
| AL022398    | A     | dJ434O14.5 (novel PUTATIVE protein similar to Y1L091C)                  | 41619_at         | 6355        | regulation of transcription, DNA-dependent              | 1.3         | 1.1         | 2.1         | 3.5        | 1.5         | 2.1         | 1.3         |  |
| AL080123    | A     | DKFZp569D2231                                                           | 39218_at         | 6355        | regulation of transcription, DNA-dependent              | -1.1        | -1.3        | 2.3         | 2.5        | 9.0         | 1.8         | 2.8         |  |
| AL050107    | A     | DKFZp586I1419                                                           | 33876_at         | 6355        | regulation of transcription, DNA-dependent              | -1.1        | 1.2         | 1.3         | 2.5        | 2.4         | 3.9         | 2.8         |  |
| AL050135    | B     | DKFZp586K091                                                            | 32144_at         | 6355        | regulation of transcription, DNA-dependent              | -1.5        | -1.2        | -1.8        | -1.3       | -1.9        | -1.2        | -3.4        |  |
| S54641      | A     | HZF-16=Kruppel-related zinc finger gene homolog (alternatively spliced) | 33658_at         | 6355        | regulation of transcription, DNA-dependent              | -1.2        | -1.2        | 2.6         | 1.5        | -1.3        | -1.6        | -2.5        |  |
| AI84738     | B     | wI84b02.x1 cDNA                                                         | 34178_at         | 6355        | regulation of transcription, DNA-dependent              | 1.2         | 1.2         | 1.0         | -1.3       | -1.7        | -3.0        | -1.6        |  |
| W37606      | A     | zct12a03.r1 cDNA                                                        | 41495_at         | 6355        | regulation of transcription, DNA-dependent              | 3.0         | 1.5         | -3.0        | 2.6        | 1.5         | 1.8         | 1.1         |  |
| AA043502    | A     | zk66d10.s1 cDNA                                                         | 40907_at         | 6355        | regulation of transcription, DNA-dependent              | -1.1        | 1.6         | 3.3         | 1.6        | 1.0         | -1.3        | -1.5        |  |
| AA258092    | A     | zs30g01.r1 cDNA                                                         | 35413_s_at       | 6355        | regulation of transcription, DNA-dependent              | 1.4         | 1.3         | 3.6         | 1.8        | 1.1         | -1.2        | 1.3         |  |
| M62810      | A     | mitochondrial transcription factor 1                                    | 36191_at         | 6356        | regulation of transcription from Pol I promoter         | 1.6         | 1.3         | 1.1         | 3.0        | 2.1         | 2.2         | 3.5         |  |
| V00568      | A     | <b>encoding the c-myc oncogene</b>                                      | <b>1973_s_at</b> | <b>6357</b> | <b>regulation of transcription from Pol II promoter</b> | <b>1.0</b>  | <b>1.0</b>  | <b>4.4</b>  | <b>1.8</b> | <b>1.5</b>  | <b>1.3</b>  | <b>4.5</b>  |  |
| Z36715      | A     | <b>Not transcription factor</b>                                         | <b>37527_at</b>  | <b>6357</b> | <b>regulation of transcription from Pol II promoter</b> | <b>-1.3</b> | <b>1.6</b>  | <b>1.9</b>  | <b>1.9</b> | <b>2.3</b>  | <b>3.4</b>  | <b>2.6</b>  |  |
| L78833      | A     | <b>BRCA1, Rho7 and vatt genes</b>                                       | <b>604_at</b>    | <b>6357</b> | <b>regulation of transcription from Pol II promoter</b> | <b>-1.3</b> | <b>-3.1</b> | <b>-1.2</b> | <b>2.0</b> | <b>23.1</b> | <b>4.7</b>  | <b>6.6</b>  |  |
| V01512      | A     | <b>cellular oncogene c-fos</b>                                          | <b>1916_s_at</b> | <b>6357</b> | <b>regulation of transcription from Pol II promoter</b> | <b>-1.3</b> | <b>1.8</b>  | <b>2.9</b>  | <b>4.7</b> | <b>7.1</b>  | <b>6.4</b>  | <b>5.1</b>  |  |
| M29939      | A     | <b>transactivator (Jun-B) gene</b>                                      | <b>2049_s_at</b> | <b>6357</b> | <b>regulation of transcription from Pol II promoter</b> | <b>-1.3</b> | <b>-1.2</b> | <b>2.4</b>  | <b>1.5</b> | <b>1.4</b>  | <b>-1.5</b> | <b>3.1</b>  |  |
| U48730      | A     | transcription factor Stat5b (stat5b)                                    | 472_at           | 6357        | regulation of transcription from Pol II promoter        | -1.1        | 1.7         | -1.9        | -3.3       | 1.7         | -1.2        | -1.5        |  |
| U64805      | A     | Brcal-delta11b (Brcal1)                                                 | 33724_at         | 6357        | regulation of transcription from Pol II promoter        | 1.4         | -1.3        | 1.5         | 1.4        | 2.0         | 2.0         | 2.5         |  |
| V01512      | A     | <b>cellular oncogene c-fos</b>                                          | <b>1915_s_at</b> | <b>6357</b> | <b>regulation of transcription from Pol II promoter</b> | <b>1.1</b>  | <b>1.6</b>  | <b>1.9</b>  | <b>2.5</b> | <b>3.0</b>  | <b>2.2</b>  | <b>3.5</b>  |  |
| AF006513    | A     | CHD1                                                                    | 39231_at         | 6357        | regulation of transcription from Pol II promoter        | -1.2        | 1.2         | 1.1         | 3.2        | 2.0         | 2.7         | 2.2         |  |

| GenBank            | Group        | Affymetric                                                      | GO id               | GO Biological Process | 0                                                         | 4           | 6           | 8           | 12          | 16          | 24          |
|--------------------|--------------|-----------------------------------------------------------------|---------------------|-----------------------|-----------------------------------------------------------|-------------|-------------|-------------|-------------|-------------|-------------|
| <b>Accession #</b> | <b>Group</b> | <b>Affymetric Gene Annotation</b>                               | <b>Probe set id</b> | <b>GO id</b>          |                                                           |             |             |             |             |             |             |
| V00568             | A            | c-myc oncogene                                                  | 37724_at            | 6357                  | regulation of transcription from Pol II promoter          | -1.2        | 1.2         | 2.5         | 2.1         | 1.6         | 1.9         |
| X64229             | A            | dek                                                             | 38992_at            | 6357                  | regulation of transcription from Pol II promoter          | 1.0         | 1.1         | 1.3         | 1.8         | 2.0         | 2.6         |
| X48213             | B            | D-site binding protein gene                                     | 40274_at            | 6357                  | regulation of transcription from Pol II promoter          | 1.1         | 1.6         | -1.5        | -1.2        | -2.3        | -1.5        |
| D89928             |              | HKL1                                                            | 37106_at            | 6357                  | regulation of transcription from Pol II promoter          | 1.1         | -1.1        | -1.9        | 2.6         | -1.2        | -1.6        |
| X77956             |              | Id1                                                             | 36617_at            | 6357                  | regulation of transcription from Pol II promoter          | 1.4         | 1.1         | 4.4         | 2.4         | 1.0         | 1.0         |
| X77956             |              | Id1                                                             | 36618_q_at          | 6357                  | regulation of transcription from Pol II promoter          | -1.4        | 1.0         | 2.6         | 1.5         | -1.1        | -1.3        |
| <b>X51345</b>      |              | <b>jun-B JUN-B protein</b>                                      | <b>32786_at</b>     | <b>6357</b>           | <b>regulation of transcription from Pol II promoter</b>   | <b>-1.1</b> | <b>-1.1</b> | <b>2.8</b>  | <b>-1.1</b> | <b>1.1</b>  | <b>-1.4</b> |
| U69609             |              | transcriptional repressor (GCF2)                                | 41320_s_at          | 6357                  | regulation of transcription from Pol II promoter          | 1.4         | -1.2        | -1.4        | 1.9         | 1.2         | -1.1        |
| AB091532           | A            | UKLF ubiquitous Kruppel like factor                             | 34217_at            | 6357                  | regulation of transcription from Pol II promoter          | 1.1         | 1.2         | 1.4         | 2.0         | 2.5         | 1.7         |
| AA478904           | A            | zv2005 r1 cDNA                                                  | 34216_at            | 6357                  | regulation of transcription from Pol II promoter          | -1.1        | -1.1        | 1.5         | 2.3         | 3.3         | 2.8         |
| U93868             | A            | RNA polymerase III subunit (RPC32)                              | 31571_at            | 6359                  | regulation of transcription from Pol III promoter         | 1.1         | -1.3        | 1.5         | 6.5         | 2.2         | 4.0         |
| L39060             | A            | transcription factor SL1                                        | 35006_at            | 6360                  | transcription from Pol I promoter                         | -1.8        | -1.2        | 1.0         | 3.0         | 2.6         | 4.1         |
| X98494             |              | M phase phosphoprotein 10                                       | 33797_at            | 6364                  | rRNA processing                                           | 1.0         | -1.3        | 3.0         | 2.0         | 1.1         | 1.0         |
| U72514             | A            | Czf                                                             | 39367_at            | 6364                  | rRNA processing                                           | 1.1         | -1.2        | 1.1         | 1.0         | 1.4         | 1.4         |
| U59151             | A            | Cbf5p homolog (CBF5)                                            | 34829_at            | 6364                  | rRNA processing                                           | 1.1         | 1.0         | 1.3         | 2.5         | 2.7         | 1.7         |
| AL050353           | A            | DKFZp547C0410                                                   | 36968_s_at          | 6364                  | rRNA processing                                           | 1.1         | 1.2         | -1.2        | 1.7         | 2.0         | 2.6         |
| X13293             |              | B-myb gene                                                      | 1854_at             | 6366                  | transcription from Pol II promoter                        | 2.2         | -1.3        | 1.0         | 1.1         | 3.1         | 1.3         |
| D14520             |              | GC-Box binding protein BTEB2                                    | 37926_at            | 6366                  | transcription from Pol II promoter                        | -1.3        | 1.3         | 2.6         | 1.6         | 1.2         | 1.2         |
| D14041             | A            | H-2K binding factor-2                                           | 40818_at            | 6366                  | transcription from Pol II promoter                        | -1.3        | 1.3         | -1.6        | 2.6         | 2.5         | 1.8         |
| AB020634           |              | KIAA0827                                                        | 40713_at            | 6366                  | transcription from Pol II promoter                        | 1.5         | 6.0         | 11.7        | 1.9         | 1.6         | 6.1         |
| Y07867             | B            | Plrin, isolate 1                                                | 35724_at            | 6366                  | transcription from Pol II promoter                        | 1.2         | -1.1        | -1.4        | -1.8        | -2.9        | -2.7        |
| Z50194             | A            | PQ-rich protein                                                 | 36239_at            | 6366                  | transcription from Pol II promoter                        | 1.2         | 1.0         | 11.2        | 12.9        | 3.8         | 9.4         |
| Y10746             | A            | protein containing MBD 1                                        | 41828_at            | 6366                  | transcription from Pol II promoter                        | -1.2        | 1.0         | -1.4        | 1.5         | 1.6         | 1.4         |
| AJ005770           |              | putative transcription factor                                   | 35186_at            | 6366                  | transcription from Pol II promoter                        | -1.1        | 1.3         | 1.3         | 2.7         | 1.6         | 1.2         |
| L24203             | B            | ataxia-telangiectasia group D-associated protein                | 1898_at             | 6366                  | transcription from Pol II promoter                        | 1.2         | -1.4        | -1.2        | -2.3        | -2.3        | -3.4        |
| M37197             | A            | CCAAT-box-binding factor (CBF)                                  | 229_at              | 6366                  | transcription from Pol II promoter                        | -1.4        | -1.4        | 1.0         | 3.5         | 1.4         | 2.0         |
| <b>X66867</b>      |              | <b>max gene</b>                                                 | <b>422_s_at</b>     | <b>6366</b>           | <b>transcription from Pol II promoter</b>                 | <b>1.1</b>  | <b>1.0</b>  | <b>2.9</b>  | <b>1.5</b>  | <b>-1.2</b> | <b>1.0</b>  |
| L19872             |              | AH-receptor                                                     | 40516_at            | 6366                  | transcription from Pol II promoter                        | 1.4         | -1.8        | -1.2        | 1.9         | 1.3         | 1.4         |
| M37197             | A            | CCAAT-box-binding factor (CBF)                                  | 32194_at            | 6366                  | transcription from Pol II promoter                        | -1.3        | 1.0         | -1.1        | 2.8         | 1.4         | 1.1         |
| AF070641           | A            | clone 24421 sequence                                            | 37156_at            | 6366                  | transcription from Pol II promoter                        | 4.7         | -1.5        | 3.3         | 2.5         | 7.1         | 3.4         |
| AL049381           | B            | DKFZp586J2118                                                   | 33355_at            | 6366                  | transcription from Pol II promoter                        | 1.3         | -1.1        | 1.4         | -2.3        | 1.0         | -1.7        |
| U13220             | A            | Forkhead protein FREAC-2                                        | 36319_at            | 6366                  | transcription from Pol II promoter                        | 1.1         | -1.1        | 1.4         | 1.0         | 2.6         | 1.6         |
| M95585             |              | hepatic leukemia factor (HLF)                                   | 38627_at            | 6366                  | transcription from Pol II promoter                        | -2.0        | 1.9         | -6.5        | 3.2         | -1.1        | -3.6        |
| U74612             | A            | hepatocyte nuclear factor-3/k head homolog 11A (HFH-11A)        | 34715_at            | 6366                  | transcription from Pol II promoter                        | 1.8         | -1.1        | 1.4         | 1.1         | 2.3         | 2.4         |
| X58072             | B            | hGATA3 trans-acting T-cell specific transcription factor        | 40511_at            | 6366                  | transcription from Pol II promoter                        | 1.0         | -1.4        | -2.2        | -1.5        | -2.4        | -4.5        |
| U96131             | A            | HPV16 E1 protein binding protein                                | 36813_at            | 6366                  | transcription from Pol II promoter                        | 1.2         | 1.1         | 1.1         | 1.7         | 3.6         | 5.1         |
| AF064094           |              | KLO4P                                                           | 37789_at            | 6366                  | transcription from Pol II promoter                        | -6.4        | -1.5        | -2.0        | -1.4        | 1.6         | -1.2        |
| <b>X60287</b>      |              | <b>max</b>                                                      | <b>1981_s_at</b>    | <b>6366</b>           | <b>transcription from Pol II promoter</b>                 | <b>1.8</b>  | <b>1.0</b>  | <b>3.1</b>  | <b>1.4</b>  | <b>-1.5</b> | <b>-1.5</b> |
| U13044             |              | nuclear respiratory factor-2 subunit alpha                      | 37245_at            | 6366                  | transcription from Pol II promoter                        | -1.2        | -1.5        | 1.6         | -1.8        | -1.5        | 7.0         |
| U44754             | A            | PSE-binding factor PTF gamma subunit                            | 35488_at            | 6366                  | transcription from Pol II promoter                        | -1.1        | 1.1         | -1.2        | 2.7         | 1.7         | 1.9         |
| X80878             |              | R kappa B                                                       | 39137_at            | 6366                  | transcription from Pol II promoter                        | 2.2         | 1.1         | 1.1         | -3.7        | 1.0         | 2.5         |
| U26914             |              | ras-responsive element binding protein (RREB-1)                 | 1714_at             | 6366                  | transcription from Pol II promoter                        | 1.1         | -1.1        | 3.6         | 1.2         | -1.3        | -1.7        |
| AF055376           | B            | short m transcription factor C-MAF (c-maf)                      | 41505_r_at          | 6366                  | transcription from Pol II promoter                        | -1.4        | 1.8         | -4.0        | -2.1        | -2.2        | -17.5       |
| AF055376           | B            | short m transcription factor C-MAF (c-maf)                      | 41504_s_at          | 6366                  | transcription from Pol II promoter                        | -1.6        | 2.7         | -7.1        | -3.3        | -2.4        | -5.8        |
| L39060             | A            | transcription factor SL1                                        | 35006_at            | 6366                  | transcription from Pol II promoter                        | -1.8        | -1.2        | 1.0         | 3.0         | 2.6         | 4.1         |
| AA845349           | B            | ak01g01.s1 cDNA                                                 | 37348_s_at          | 6366                  | transcription from Pol II promoter                        | -1.1        | 1.5         | -1.5        | 1.1         | -1.3        | -1.3        |
| AL050135           | B            | DKFZp586K091                                                    | 32144_at            | 6366                  | transcription from Pol II promoter                        | -1.5        | -1.2        | -1.8        | -1.3        | -1.9        | -1.2        |
| AI817618           |              | wk39f01.x1 cDNA                                                 | 37349_r_at          | 6366                  | transcription from Pol II promoter                        | -1.6        | 1.2         | -1.4        | -3.2        | -3.4        | -2.6        |
| X16901             | A            | RAP30 subunit of transcription initiation factor RAP30          | 36510_at            | 6367                  | transcription initiation from Pol II promoter             | -1.2        | -1.1        | -1.4        | 2.1         | 1.5         | 2.0         |
| X16901             | A            | RAP30 subunit of transcription initiation factor RAP30          | 36510_at            | 6368                  | RNA elongation from Pol II promoter                       | -1.2        | -1.1        | -1.4        | 2.1         | 1.5         | 2.0         |
| X66975             |              | heterogeneous nuclear ribonucleoprotein                         | 40593_at            | 6371                  | mRNA splicing                                             | -1.1        | 1.2         | 1.1         | 1.0         | 1.7         | 2.7         |
| J03798             |              | autoantigen small nuclear ribonucleoprotein Sm-D                | 37949_at            | 6371                  | mRNA splicing                                             | 4.6         | 1.0         | 2.0         | 2.2         | 4.6         | 1.1         |
| L21990             |              | spliceosomal protein (SAP 62) gene                              | 37462_i_at          | 6371                  | mRNA splicing                                             | 1.2         | -1.3        | -3.1        | -2.2        | -1.4        | -1.4        |
| L41887             | A            | splicing factor, arginine/serine-rich 7 (SFRS7)                 | 32165_at            | 6371                  | mRNA splicing                                             | 1.0         | 1.2         | 1.2         | 3.7         | 2.0         | 1.9         |
| AF016369           |              | U4/U6 small nuclear ribonucleoprotein hPrp4                     | 37935_at            | 6371                  | mRNA splicing                                             | 2.6         | 1.2         | 2.5         | 2.4         | 2.2         | 1.1         |
| AL031681           |              | dJ862K6.2.2 (splicing factor, arginine/serine-rich 6 (SRP55-2)) | 35808_at            | 6376                  | mRNA splice site selection                                | -1.5        | 1.5         | -1.3        | 1.4         | 1.3         | 2.7         |
| X76770             |              | PAP                                                             | 34855_at            | 6378                  | mRNA polyadenylation                                      | -1.3        | 1.7         | -1.4        | 1.2         | 1.9         | 3.0         |
| U44754             | A            | PSE-binding factor PTF gamma subunit                            | 35488_at            | 6383                  | transcription from Pol III promoter                       | -1.1        | 1.1         | -1.2        | 2.7         | 1.7         | 1.9         |
| M62810             | A            | mitochondrial transcription factor 1                            | 36191_at            | 6390                  | transcription from mitochondrial promoter                 | 1.6         | 1.3         | 1.1         | 3.0         | 2.1         | 2.3         |
| Y09615             |              | mitochondrial transcription termination factor                  | 41070_r_at          | 6393                  | RNA transcription termination from mitochondrial promoter | -1.8        | 1.8         | -29.0       | 2.6         | 1.1         | 1.6         |
| D89678             |              | A+U-rich element RNA binding factor                             | 40576_f_at          | 6396                  | RNA processing                                            | 1.2         | 1.3         | -1.4        | 1.5         | 2.7         | 3.3         |
| L36529             | A            | (clone N5-4) protein p84                                        | 40242_at            | 6396                  | RNA processing                                            | -1.2        | 1.0         | 1.1         | 2.2         | 2.0         | 2.1         |
| W27466             | A            | 31c9 cDNA                                                       | 32393_s_at          | 6396                  | RNA processing                                            | -1.4        | 2.1         | 1.3         | 2.4         | 2.2         | 2.9         |
| L41887             | A            | splicing factor, arginine/serine-rich 7 (SFRS7)                 | 32165_at            | 6397                  | mRNA processing                                           | 1.0         | 1.2         | 1.2         | 3.7         | 2.0         | 1.9         |
| AF027150           |              | survival of motor neuron protein interacting protein 1          | 41363_at            | 6397                  | mRNA processing                                           | -2.0        | 1.0         | 2.3         | 3.0         | 1.2         | 1.1         |
| AL031387           |              | dJ596C15.1.1 (novel protein) (isom 1)                           | 35136_at            | 6397                  | mRNA processing                                           | 1.6         | 1.0         | -3.2        | 1.2         | 1.2         | 1.5         |
| Z97029             | A            | ribonuclease H I large subunit                                  | 35141_at            | 6401                  | RNA catabolism                                            | 1.5         | -2.4        | 1.7         | -2.2        | 1.2         | 2.9         |
| M92843             | A            | zinc finger transcriptional regulator                           | 40448_at            | 6402                  | mRNA catabolism                                           | 1.1         | 1.0         | 1.6         | 1.3         | 1.8         | 1.7         |
| D83781             | A            | KIAA0197                                                        | 34253_at            | 6406                  | mRNA-nucleus export                                       | 1.5         | 1.0         | -2.1        | 1.2         | 1.4         | 2.1         |
| AL030996           |              | dJ1189B24.4 (novel PUTATIVE protein)                            | 32124_at            | 6406                  | mRNA-nucleus export                                       | -1.3        | 1.5         | 4.5         | 3.8         | 2.7         | 2.1         |
| AL031387           |              | dJ596C15.1.1 (novel protein) (isom 1)                           | 35136_at            | 6406                  | mRNA-nucleus export                                       | 1.6         | 1.0         | -3.2        | 1.2         | 1.2         | 1.5         |
| D32050             |              | alanyl-tRNA synthetase                                          | 36185_at            | 6412                  | protein biosynthesis                                      | 1.1         | -1.2        | -1.2        | 1.0         | -1.1        | 1.0         |
| X55954             |              | HL23 ribosomal protein homologue                                | 32394_s_at          | 6412                  | protein biosynthesis                                      | -3.2        | -1.5        | 1.1         | -3.0        | -2.0        | 2.5         |
| X55954             |              | HL23 ribosomal protein homologue                                | 32395_r_at          | 6412                  | protein biosynthesis                                      | -2.8        | -1.1        | 1.3         | -1.8        | -1.5        | 2.7         |
| X06617             |              | ribosomal protein S11                                           | 32330_at            | 6412                  | protein biosynthesis                                      | -3.1        | -1.2        | -1.1        | -2.9        | -2.0        | 1.2         |
| X04754             |              | yeast methionyl-tRNA synthetase homologue                       | 39342_at            | 6412                  | protein biosynthesis                                      | 1.2         | 1.1         | 1.3         | 1.0         | 1.0         | 1.2         |
| <b>M60974</b>      | <b>A</b>     | <b>growth arrest and DNA-damage-inducible protein</b>           | <b>1911_s_at</b>    | <b>6412</b>           | <b>protein biosynthesis</b>                               | <b>1.2</b>  | <b>1.1</b>  | <b>-1.2</b> | <b>2.1</b>  | <b>1.5</b>  | <b>1.6</b>  |
| L06845             |              | cysteinyl-tRNA synthetase                                       | 40408_at            | 6412                  | protein biosynthesis                                      | -1.2        | 1.1         | -1.3        | -1.1        | -1.3        | -2.2        |
| AF054186           |              | p18 protein                                                     | 40587_s_at          | 6412                  | protein biosynthesis                                      | 1.1         | -2.2        | 1.7         | 1.4         | 2.4         | 3.2         |

| GenBank     |       | Affymetrix                                         |              |       |                                    | Fold Change |      |      |      |      |       |      |  |  |  |
|-------------|-------|----------------------------------------------------|--------------|-------|------------------------------------|-------------|------|------|------|------|-------|------|--|--|--|
| Accession # | Group | Affymetric Gene Annotation                         | Probe set id | GO id | GO Biological Process              | 0           | 4    | 6    | 8    | 12   | 16    | 24   |  |  |  |
| AL050151    | A     | DKF Zp586J0720                                     | 38505_at     | 6412  | protein biosynthesis               | -1.2        | 1.2  | 1.1  | 1.5  | 3.1  | 3.6   | 3.6  |  |  |  |
| AL049705    |       | PAC 262D12, chromosome 1                           | 32732_at     | 6412  | protein biosynthesis               | -1.4        | 1.3  | 1.7  | -1.1 | -1.4 | -9.3  | -1.6 |  |  |  |
| AI768188    |       | wg82b12.x1 cDNA                                    | 40813_at     | 6412  | protein biosynthesis               | 1.4         | 1.1  | -1.7 | 2.0  | 3.4  | 3.6   | -1.2 |  |  |  |
| X59303      |       | G7a valyl-tRNA synthetase                          | 40414_at     | 6414  | translational elongation           | 1.7         | -1.5 | -1.5 | -3.5 | -1.8 | -3.2  | 1.1  |  |  |  |
| L36055      | A     | 4E-binding protein 1                               | 31597_r_at   | 6417  | regulation of protein biosynthesis | 2.1         | 1.3  | 1.4  | 1.3  | 3.5  | 3.8   | 5.8  |  |  |  |
| D32050      |       | alanyl-tRNA synthetase                             | 36185_at     | 6419  | alanyl-tRNA aminoacylation         | 1.1         | -1.2 | -1.2 | 1.0  | -1.1 | 1.0   | 2.7  |  |  |  |
| L06845      | A     | cysteinyl-tRNA synthetase                          | 40408_at     | 6423  | cysteinyl-tRNA aminoacylation      | -1.2        | 1.1  | -1.3 | -1.1 | -1.3 | -2.2  | 3.0  |  |  |  |
| U09510      | A     | glycyl-tRNA synthetase                             | 36581_at     | 6426  | glycyl-tRNA aminoacylation         | -1.5        | 1.1  | -1.3 | 1.5  | 1.6  | 1.9   | 2.9  |  |  |  |
| U09410      | A     | glycyl-tRNA synthetase                             | 36582_g_at   | 6426  | glycyl-tRNA aminoacylation         | 1.0         | -1.1 | -1.1 | 1.4  | 1.1  | 1.3   | 4.0  |  |  |  |
| M63180      | A     | threonyl-tRNA synthetase                           | 38473_at     | 6435  | threonyl-tRNA aminoacylation       | -1.1        | -1.1 | -1.5 | 1.2  | 1.3  | 1.3   | 2.6  |  |  |  |
| X59303      |       | G7a valyl-tRNA synthetase                          | 40414_at     | 6438  | valyl-tRNA aminoacylation          | 1.7         | -1.5 | -1.5 | -3.5 | -1.8 | -3.2  | 1.1  |  |  |  |
| U79273      |       | clone 23933 sequence                               | 36234_at     | 6441  | binding to mRNA cap                | 2.5         | -1.1 | 1.3  | 2.0  | 1.4  | -1.4  | 1.3  |  |  |  |
| AB011123    | B     | KIAA0551                                           | 32880_at     | 6445  | regulation of translation          | -1.4        | 1.4  | -1.4 | -1.2 | -1.4 | -1.6  | -3.5 |  |  |  |
| L36055      | A     | 4E-binding protein 1                               | 31597_r_at   | 6445  | regulation of translation          | 2.1         | 1.3  | 1.4  | 1.3  | 3.5  | 3.8   | 5.8  |  |  |  |
| AB018273    | A     | KIAA0730                                           | 32102_at     | 6457  | protein folding                    | 1.3         | 1.0  | 2.2  | 3.1  | 1.7  | 2.7   | 2.1  |  |  |  |
| AF036927    | B     | adenyl cyclase type IX                             | 33800_at     | 6457  | protein folding                    | 1.1         | 1.0  | 1.2  | -1.8 | -1.2 | -1.8  | -3.7 |  |  |  |
| Y00371      |       | hsc70 gene 71 kd heat shock cognate protein        | 40637_at     | 6457  | protein folding                    | 1.0         | 1.0  | 2.6  | -1.2 | -1.3 | 1.1   | -1.5 |  |  |  |
| X63368      | B     | HSJ1                                               | 37365_at     | 6457  | protein folding                    | -1.2        | -1.3 | 1.0  | -1.9 | -2.2 | -2.4  | -3.4 |  |  |  |
| X75621      | B     | TSC2 tuberin                                       | 38813_at     | 6457  | protein folding                    | 1.4         | -1.7 | -1.5 | -2.4 | -1.9 | -3.0  | -2.5 |  |  |  |
| AL038340    | B     | DKF Zp566K192                                      | 32243_g_at   | 6457  | protein folding                    | -1.2        | -1.1 | -1.7 | -1.9 | -2.3 | -3.8  | -4.9 |  |  |  |
| AL038340    | B     | DKF Zp566K192_s1                                   | 32242_at     | 6457  | protein folding                    | -1.1        | -1.1 | -1.5 | -1.9 | -3.0 | -4.3  | -4.4 |  |  |  |
| X89101      |       | Fas (Apo-1, CD95)                                  | 1808_s_at    | 6461  | protein complex assembly           | 1.7         | -1.3 | 2.0  | 1.8  | 1.2  | 5.7   | -1.1 |  |  |  |
| X83490      |       | Fas/Apo-1                                          | 1440_s_at    | 6461  | protein complex assembly           | -1.1        | -1.1 | 3.9  | 1.7  | 1.4  | 1.6   | 1.4  |  |  |  |
| X83492      |       | Fas/Apo-1                                          | 1441_s_at    | 6461  | protein complex assembly           | -1.9        | -1.5 | -2.2 | 2.5  | 1.0  | 3.1   | 1.8  |  |  |  |
| D79988      |       | KIAA0166                                           | 37489_at     | 6461  | protein complex assembly           | 3.9         | 1.5  | -1.2 | 1.0  | 2.4  | 1.3   | 3.5  |  |  |  |
| U73704      |       | 48 kDa FKBP-associated protein FAP48               | 39893_at     | 6461  | protein complex assembly           | 1.8         | -1.2 | 1.4  | 1.0  | 1.2  | 2.5   | -1.2 |  |  |  |
| U20979      | A     | chromatin assembly factor-1 p150 subunit           | 32589_at     | 6461  | protein complex assembly           | 1.1         | -1.4 | -1.2 | -2.0 | 2.7  | 3.9   | 3.1  |  |  |  |
| U20980      | A     | chromatin assembly factor-1 p60 subunit            | 36812_at     | 6461  | protein complex assembly           | 3.2         | -1.1 | 1.2  | -2.2 | 9.3  | 5.6   | 3.6  |  |  |  |
| L19711      | B     | dystroglycan (DAG1)                                | 36989_at     | 6461  | protein complex assembly           | -1.1        | -1.2 | -1.1 | -2.4 | -2.3 | -2.1  | -3.1 |  |  |  |
| AF015926    | B     | ezzrin-radixin-moesin binding phosphoprotein-50    | 32174_at     | 6461  | protein complex assembly           | 1.0         | -1.1 | 1.1  | -1.7 | -1.9 | -3.0  | -3.6 |  |  |  |
| X66894      |       | FACC from complementation group C (FA(C))          | 35713_at     | 6461  | protein complex assembly           | -3.6        | 2.0  | 1.5  | 1.1  | 4.3  | 1.2   | 2.5  |  |  |  |
| U60319      |       | haemochromatosis protein (HLA-H)                   | 38913_at     | 6461  | protein complex assembly           | 3.5         | 1.2  | 1.3  | 1.1  | -2.5 | -1.2  | -1.1 |  |  |  |
| AF064606    |       | KB07 protein                                       | 36437_s_at   | 6461  | protein complex assembly           | 1.7         | 1.4  | 1.2  | 2.5  | 1.2  | -1.2  | 2.7  |  |  |  |
| X07024      |       | X chromosome mRNA for CCG1 protein                 | 112_g_at     | 6461  | protein complex assembly           | 3.1         | 1.2  | 2.7  | -1.9 | -1.2 | -1.7  | 1.2  |  |  |  |
| W28255      |       | 44b8 cDNA                                          | 40984_at     | 6461  | protein complex assembly           | 23.3        | 1.1  | 1.9  | 1.4  | -1.2 | 4.0   | -2.6 |  |  |  |
| AI190165    | A     | qd57d10.x1 cDNA                                    | 34451_at     | 6461  | protein complex assembly           | 1.4         | -1.1 | -1.4 | 2.3  | 2.0  | 2.2   | 2.9  |  |  |  |
| AI337192    |       | qx88h10.x1 cDNA                                    | 36040_at     | 6461  | protein complex assembly           | -1.5        | -1.3 | -3.7 | 1.7  | 1.0  | -1.2  | -1.8 |  |  |  |
| X51405      |       | carboxypeptidase E (EC 3.4.17.10)                  | 36606_at     | 6464  | protein modification               | 1.2         | 1.2  | -2.6 | 1.8  | -1.2 | -2.6  | -1.9 |  |  |  |
| AB017566    |       | lipoyltransferase                                  | 37441_at     | 6464  | protein modification               | -1.7        | 3.3  | 2.7  | 2.8  | -1.5 | 2.8   | 5.1  |  |  |  |
| U47077      |       | DNA-dependent protein kinase catalytic subunit     | 1250_at      | 6464  | protein modification               | 1.3         | 1.1  | -3.1 | -1.2 | 1.1  | 1.4   | 1.3  |  |  |  |
| U60337      | B     | beta-mannosidase                                   | 37472_at     | 6464  | protein modification               | -1.5        | 1.1  | -1.1 | -1.2 | 1.1  | -1.5  | -3.1 |  |  |  |
| L06419      |       | lysyl hydroxylase (PLOD)                           | 36194_at     | 6464  | protein modification               | -1.4        | -1.4 | -1.7 | -2.6 | -1.1 | 1.2   | 1.1  |  |  |  |
| L16895      | B     | lysyl oxidase (LX) gene, exon 7                    | 38637_at     | 6464  | protein modification               | 1.3         | -1.1 | -1.7 | 1.0  | -2.1 | -4.0  | -6.8 |  |  |  |
| U24389      |       | lysyl oxidase-like protein gene                    | 36811_at     | 6464  | protein modification               | 1.0         | -1.2 | 1.9  | -3.0 | 1.8  | -1.4  | -2.2 |  |  |  |
| AA151922    |       | zo30d07.r1 cDNA                                    | 32721_at     | 6464  | protein modification               | 1.6         | -1.2 | -3.3 | 1.7  | -1.2 | -1.2  | 1.8  |  |  |  |
| D87119      | A     | GS3955                                             | 717_at       | 6468  | protein amino acid phosphorylation | 1.3         | 1.0  | 1.0  | 3.8  | 4.8  | 4.2   | 6.5  |  |  |  |
| X06318      |       | protein kinase C (PKC) type beta I                 | 1336_s_at    | 6468  | protein amino acid phosphorylation | -1.9        | -2.6 | -1.1 | 1.6  | -2.5 | -1.1  | 1.7  |  |  |  |
| Y10032      | B     | putative serine/threonine protein kinase           | 973_at       | 6468  | protein amino acid phosphorylation | 1.5         | -1.2 | 1.7  | -1.4 | -1.2 | -2.3  | -3.0 |  |  |  |
| X99325      |       | Ste20-like kinase                                  | 399_at       | 6468  | protein amino acid phosphorylation | 1.3         | -6.0 | 2.5  | -1.6 | 1.0  | -1.4  | 1.3  |  |  |  |
| D88357      | A     | CDC2 delta T                                       | 33324_s_at   | 6468  | protein amino acid phosphorylation | 1.7         | 1.6  | 1.3  | 1.7  | 1.9  | 8.4   | 8.1  |  |  |  |
| X03663      |       | c-fms proto-oncogene                               | 160022_at    | 6468  | protein amino acid phosphorylation | -1.5        | -2.1 | -1.3 | -1.5 | -2.0 | -10.7 | -1.2 |  |  |  |
| AB011420    | A     | DRAK1                                              | 38822_at     | 6468  | protein amino acid phosphorylation | 1.4         | -1.1 | 1.3  | 2.2  | 2.7  | 1.7   | 2.5  |  |  |  |
| D83492      | B     | Eph-family protein                                 | 39930_at     | 6468  | protein amino acid phosphorylation | -1.1        | -1.6 | -1.1 | -1.9 | -2.2 | -5.3  | -2.4 |  |  |  |
| D87119      | A     | GS3955                                             | 40113_at     | 6468  | protein amino acid phosphorylation | 1.7         | 1.0  | 1.6  | 3.6  | 3.3  | 4.6   | 5.8  |  |  |  |
| D79997      | A     | KIAA0175                                           | 38847_at     | 6468  | protein amino acid phosphorylation | -1.1        | 1.2  | 1.3  | 1.2  | 2.0  | 2.9   | 5.5  |  |  |  |
| AB002367    |       | KIAA0369                                           | 38957_at     | 6468  | protein amino acid phosphorylation | -1.5        | 1.1  | -1.7 | 2.0  | -1.2 | -4.1  | -3.0 |  |  |  |
| AB011108    |       | KIAA0536                                           | 32784_at     | 6468  | protein amino acid phosphorylation | 2.8         | -1.2 | -1.4 | 1.5  | 1.0  | 1.0   | 1.0  |  |  |  |
| AB011123    | B     | KIAA0551                                           | 32680_at     | 6468  | protein amino acid phosphorylation | -1.4        | 1.4  | -1.4 | -1.2 | -1.4 | -1.6  | -3.5 |  |  |  |
| AB014587    | A     | KIAA0687                                           | 35694_at     | 6468  | protein amino acid phosphorylation | 1.1         | 1.0  | -1.6 | 1.3  | 1.7  | 1.2   | 2.8  |  |  |  |
| AB020641    | A     | KIAA0834                                           | 36502_at     | 6468  | protein amino acid phosphorylation | 1.1         | -1.2 | -1.5 | 2.8  | 2.4  | 2.9   | 1.6  |  |  |  |
| AB023153    | B     | KIAA0936                                           | 41431_at     | 6468  | protein amino acid phosphorylation | 1.3         | -1.1 | -1.5 | -1.7 | -2.9 | -1.9  | -2.0 |  |  |  |
| AB023182    | A     | KIAA0965                                           | 32182_at     | 6468  | protein amino acid phosphorylation | 1.1         | 1.0  | 2.6  | 2.1  | 2.5  | 1.4   | 2.2  |  |  |  |
| X66360      |       | PCTAIRE-2 serine/threonine protein kinase          | 39873_at     | 6468  | protein amino acid phosphorylation | -1.1        | -1.6 | 2.6  | 1.1  | 1.1  | 1.1   | 1.9  |  |  |  |
| AB000449    | A     | VRK1                                               | 39980_at     | 6468  | protein amino acid phosphorylation | 1.2         | -1.4 | 1.6  | 1.3  | 1.4  | 3.4   | 3.1  |  |  |  |
| X05360      | A     | CDC2 gene involved in cell cycle control           | 1803_at      | 6468  | protein amino acid phosphorylation | -1.5        | 1.1  | 1.6  | 1.8  | 2.8  | 2.8   | 4.6  |  |  |  |
| M15990      | A     | c-yes-1                                            | 1674_at      | 6468  | protein amino acid phosphorylation | -1.8        | 1.1  | -1.3 | 2.2  | 1.7  | 2.5   | 1.5  |  |  |  |
| X60188      | B     | ERK1 protein serine/threonine kinase               | 1000_at      | 6468  | protein amino acid phosphorylation | 1.0         | -1.1 | -1.3 | -1.4 | -1.3 | -2.8  | -1.5 |  |  |  |
| AF035121    |       | KDR/Itk-1 protein                                  | 1954_at      | 6468  | protein amino acid phosphorylation | 1.4         | -1.7 | 1.0  | -1.1 | 4.3  | -3.6  | -2.9 |  |  |  |
| M86699      | A     | kinase (TTK), complete cds                         | 572_at       | 6468  | protein amino acid phosphorylation | 1.7         | 1.2  | -1.5 | 2.5  | 6.0  | 7.2   | 11.3 |  |  |  |
| U33052      |       | lipid-activated, protein kinase PRK2               | 199_s_at     | 6468  | protein amino acid phosphorylation | -1.1        | 1.0  | 3.3  | 1.5  | 1.1  | 1.1   | 1.2  |  |  |  |
| L05624      | A     | MAP kinase kinase, complete cds                    | 1844_s_at    | 6468  | protein amino acid phosphorylation | 1.7         | 1.6  | 1.1  | 2.7  | 2.5  | 2.2   | 3.7  |  |  |  |
| U43784      |       | mitogen activated protein kinase activated protein | 1991_s_at    | 6468  | protein amino acid phosphorylation | -1.1        | 1.3  | -1.3 | -2.5 | -1.3 | -1.4  | -1.2 |  |  |  |
| X66363      | B     | PCTAIRE-1 serine/threonine protein kinase          | 1224_at      | 6468  | protein amino acid phosphorylation | 1.2         | 1.3  | -2.0 | -1.6 | -1.5 | -2.6  | -1.2 |  |  |  |
| X66360      |       | PCTAIRE-2 serine/threonine protein kinase          | 1222_at      | 6468  | protein amino acid phosphorylation | 1.7         | -1.1 | 1.2  | -1.1 | 1.3  | -1.4  | 2.8  |  |  |  |
| M16750      | A     | pin-1 oncogene                                     | 1779_s_at    | 6468  | protein amino acid phosphorylation | -1.2        | -1.3 | 2.3  | 1.8  | 2.4  | 1.9   | 3.6  |  |  |  |
| L26318      |       | protein kinase (JNK1)                              | 2070_l_at    | 6468  | protein amino acid phosphorylation | 1.0         | -2.2 | 12.3 | -1.5 | -1.8 | 1.1   | 57.2 |  |  |  |
| M64174      | B     | protein-tyrosine kinase (JAK1)                     | 1457_at      | 6468  | protein amino acid phosphorylation | 1.4         | 1.5  | 1.1  | -1.7 | -1.7 | -3.4  | -1.9 |  |  |  |
| L36645      |       | receptor protein-tyrosine kinase                   | 1606_at      | 6468  | protein amino acid phosphorylation | -2.3        | 1.0  | 1.2  | -1.2 | -2.5 | -8.6  | -6.3 |  |  |  |
| D17517      |       | Sky                                                | 2086_s_at    | 6468  | protein amino acid phosphorylation | 1.4         | 1.2  | -1.7 | -1.1 | 2.3  | 2.5   | 1.7  |  |  |  |

| GenBank         |          | Affymetrix                                                         |                   |             |                                             | Fold Change |             |             |             |             |             |              |
|-----------------|----------|--------------------------------------------------------------------|-------------------|-------------|---------------------------------------------|-------------|-------------|-------------|-------------|-------------|-------------|--------------|
| Accession #     | Group    | Affymetric Gene Annotation                                         | Probe set id      | GO id       | GO Biological Process                       | 0           | 4           | 6           | 8           | 12          | 16          | 24           |
| M97675          |          | transmembrane receptor (ror1)                                      | 213_at            | 6468        | protein amino acid phosphorylation          | 1.0         | -1.2        | 2.3         | -1.1        | -1.5        | -1.9        | -2.8         |
| L11695          |          | activin receptor-like kinase (ALK-5)                               | 32903_at          | 6468        | protein amino acid phosphorylation          | 2.8         | -5.4        | 1.2         | 1.0         | -1.2        | 2.8         | -1.4         |
| U29725          | B        | BMK1 alpha kinase                                                  | 35617_at          | 6468        | protein amino acid phosphorylation          | -1.1        | -1.3        | -1.2        | -1.9        | -1.7        | -2.9        | -1.4         |
| M95712          |          | B-raf                                                              | 1654_at           | 6468        | protein amino acid phosphorylation          | -1.2        | 1.2         | -2.9        | -2.0        | -1.5        | 1.3         | -1.2         |
| U66063          | B        | calcium/calmodulin-dependent protein kinase II                     | 32104_i_at        | 6468        | protein amino acid phosphorylation          | 1.2         | -1.4        | -1.8        | -1.9        | -2.7        | -3.2        | -2.7         |
| <b>Y00272</b>   | <b>A</b> | <b>cell cycle control gene CDC2</b>                                | <b>40915_r_at</b> | <b>6468</b> | <b>protein amino acid phosphorylation</b>   | <b>-1.8</b> | <b>-1.1</b> | <b>-1.5</b> | <b>1.2</b>  | <b>1.5</b>  | <b>7.8</b>  | <b>3.9</b>   |
| AF016582        |          | checkpoint kinase Chk1 (CHK1)                                      | 38920_at          | 6468        | protein amino acid phosphorylation          | -1.3        | -1.4        | 6.2         | 22.1        | 1.2         | 2.0         | 11.9         |
| X76104          | B        | DAP-kinase                                                         | 40049_at          | 6468        | protein amino acid phosphorylation          | 1.2         | 1.5         | -1.2        | -2.0        | -1.2        | -1.4        | -2.6         |
| M34309          | B        | epidermal growth factor receptor (HER3)                            | 15851_at          | 6468        | protein amino acid phosphorylation          | 1.0         | -1.6        | -1.4        | -2.3        | -1.7        | -5.1        | -1.5         |
| AF001862        | B        | epidermal growth factor receptor (HER3)                            | 32787_at          | 6468        | protein amino acid phosphorylation          | -1.1        | -1.3        | -3.2        | -2.0        | -1.7        | -2.3        | -2.3         |
| AF015331        |          | FYM binding protein                                                | 41819_at          | 6468        | protein amino acid phosphorylation          | -1.9        | 1.2         | -3.3        | -1.2        | -1.8        | -3.1        | -20.9        |
| L36870          |          | MAP kinase kinase 4 (MKK4)                                         | 37170_at          | 6468        | protein amino acid phosphorylation          | -1.1        | -1.2        | 2.7         | 1.6         | 1.7         | 1.3         | -2.1         |
| U67156          | A        | mitogen-activated kinase kinase 5 (MAPKKK5)                        | 1845_at           | 6468        | protein amino acid phosphorylation          | 1.0         | 1.5         | -1.4        | 1.4         | 2.0         | 2.6         | -2.0         |
| <b>AF053305</b> | <b>A</b> | <b>mitotic checkpoint kinase Bub1 (BUB1)</b>                       | <b>41081_at</b>   | <b>6468</b> | <b>protein amino acid phosphorylation</b>   | <b>1.2</b>  | <b>1.3</b>  | <b>-5.3</b> | <b>2.1</b>  | <b>2.2</b>  | <b>7.2</b>  | <b>7.6</b>   |
| AF097738        | B        | non-receptor tyrosine kinase (TNK1) gene                           | 38922_at          | 6468        | protein amino acid phosphorylation          | 1.2         | -1.3        | -4.0        | -4.4        | -1.4        | -1.9        | -2.3         |
| U01038          | A        | pLK                                                                | 37228_at          | 6468        | protein amino acid phosphorylation          | 1.1         | 1.1         | 1.5         | -1.5        | 5.7         | 1.9         | 6.6          |
| U18934          |          | receptor tyrosine kinase (DTK)                                     | 35246_at          | 6468        | protein amino acid phosphorylation          | 1.2         | 1.3         | -1.5        | -1.2        | 2.3         | 2.9         | 1.6          |
| <b>AF011468</b> | <b>A</b> | <b>serine/threonine kinase (BTAk)</b>                              | <b>34851_at</b>   | <b>6468</b> | <b>protein amino acid phosphorylation</b>   | <b>1.0</b>  | <b>1.4</b>  | <b>1.1</b>  | <b>1.0</b>  | <b>1.6</b>  | <b>2.7</b>  | <b>4.9</b>   |
| <b>AF011468</b> | <b>A</b> | <b>serine/threonine kinase (BTAk)</b>                              | <b>34852_g_at</b> | <b>6468</b> | <b>protein amino acid phosphorylation</b>   | <b>1.1</b>  | <b>1.0</b>  | <b>1.4</b>  | <b>1.2</b>  | <b>1.3</b>  | <b>2.4</b>  | <b>3.9</b>   |
| AF015254        | A        | serine/threonine kinase (STK-1), complete cds /cds                 | 33266_at          | 6468        | protein amino acid phosphorylation          | 2.1         | 1.1         | 1.1         | 1.0         | 2.5         | 1.9         | 4.4          |
| AF045458        | B        | serine/threonine kinase ULK1 (ULK1)                                | 34827_at          | 6468        | protein amino acid phosphorylation          | 1.1         | -1.3        | -1.6        | -3.2        | -3.4        | -2.4        | -1.9         |
| U59305          |          | ser-thr protein kinase PK428                                       | 39962_at          | 6468        | protein amino acid phosphorylation          | -2.0        | 1.1         | 3.2         | 1.8         | -1.3        | -22.7       | 1.5          |
| AF099989        | A        | Ste-20 related kinase SPAK                                         | 40966_at          | 6468        | protein amino acid phosphorylation          | -1.1        | -1.1        | -1.6        | 1.1         | 1.4         | 1.5         | 2.6          |
| X62048          |          | Wee1                                                               | 38909_at          | 6468        | protein amino acid phosphorylation          | 1.1         | 2.4         | -1.5        | 2.0         | 4.1         | 3.4         | 3.9          |
| X07024          |          | X chromosome mRNA for CCG1 protein                                 | 112_g_at          | 6468        | protein amino acid phosphorylation          | 3.1         | 1.2         | 2.7         | -1.9        | -1.2        | -1.7        | 1.2          |
| AA902713        | B        | okT111 s1 cDNA                                                     | 39389_at          | 6468        | protein amino acid phosphorylation          | 1.0         | -1.4        | -1.9        | -1.6        | -2.8        | -2.1        | 4.6          |
| S59184          | A        | related to receptor tyrosine kinase                                | 37756_at          | 6468        | protein amino acid phosphorylation          | -1.9        | 1.2         | 1.3         | 3.1         | 1.9         | 1.7         | 1.3          |
| S59184          |          | RYK-related to receptor tyrosine kinase                            | 539_at            | 6468        | protein amino acid phosphorylation          | -1.1        | 1.4         | 2.3         | 1.2         | -1.9        | -3.4        | 1.1          |
| <b>AB013382</b> | <b>A</b> | <b>DUSP6</b>                                                       | <b>41193_at</b>   | <b>6470</b> | <b>protein amino acid dephosphorylation</b> | <b>1.2</b>  | <b>1.2</b>  | <b>16.2</b> | <b>24.1</b> | <b>26.3</b> | <b>31.3</b> | <b>143.4</b> |
| <b>U15932</b>   | <b>A</b> | <b>dual-specificity protein phosphatase</b>                        | <b>529_at</b>     | <b>6470</b> | <b>protein amino acid dephosphorylation</b> | <b>1.1</b>  | <b>-1.1</b> | <b>4.1</b>  | <b>4.3</b>  | <b>3.2</b>  | <b>4.9</b>  | <b>24.0</b>  |
| <b>U48807</b>   | <b>A</b> | <b>MAP kinase phosphatase (MKP-2)</b>                              | <b>1788_s_at</b>  | <b>6470</b> | <b>protein amino acid dephosphorylation</b> | <b>1.1</b>  | <b>-1.5</b> | <b>10.3</b> | <b>5.5</b>  | <b>4.3</b>  | <b>4.9</b>  | <b>4.3</b>   |
| M93425          | A        | protein tyrosine phosphatase (PTP-PEST)                            | 1463_at           | 6470        | protein amino acid dephosphorylation        | -1.2        | 1.1         | 2.2         | 2.1         | 2.4         | 1.8         | 3.7          |
| <b>M81933</b>   |          | <b>cdc25A</b>                                                      | <b>1738_at</b>    | <b>6470</b> | <b>protein amino acid dephosphorylation</b> | <b>1.4</b>  | <b>1.5</b>  | <b>-1.5</b> | <b>1.4</b>  | <b>5.8</b>  | <b>4.2</b>  | <b>3.8</b>   |
| <b>M81933</b>   | <b>A</b> | <b>cdc25A</b>                                                      | <b>35407_at</b>   | <b>6470</b> | <b>protein amino acid dephosphorylation</b> | <b>-2.3</b> | <b>-1.1</b> | <b>1.8</b>  | <b>1.1</b>  | <b>5.6</b>  | <b>4.4</b>  | <b>6.2</b>   |
| X54134          | A        | HPTP epsilon protein tyrosine phosphatase epsilon                  | 32916_at          | 6470        | protein amino acid dephosphorylation        | 1.3         | -1.1        | 4.2         | 2.1         | 2.5         | 3.1         | 5.3          |
| X58288          |          | hR-PTP gene protein tyrosine phosphatase                           | 31892_at          | 6470        | protein amino acid dephosphorylation        | 1.1         | -1.1        | -2.6        | 1.3         | 1.2         | 1.0         | -1.5         |
| X58288          |          | hR-PTP gene protein tyrosine phosphatase                           | 994_at            | 6470        | protein amino acid dephosphorylation        | 1.1         | -1.1        | -2.6        | 1.3         | 1.2         | 1.0         | -1.5         |
| X58288          |          | hR-PTP gene protein tyrosine phosphatase                           | 995_g_at          | 6470        | protein amino acid dephosphorylation        | 1.1         | -1.1        | -2.6        | 1.3         | 1.2         | 1.0         | -1.5         |
| U93181          | B        | nuclear dual-specificity phosphatase (SBF1)                        | 39835_at          | 6470        | protein amino acid dephosphorylation        | 1.1         | -1.4        | 1.1         | -1.2        | 1.2         | -2.1        | -2.5         |
| M60483          |          | protein phosphatase 2A catalytic subunit-alpha gene                | 237_s_at          | 6470        | protein amino acid dephosphorylation        | -2.4        | 1.1         | 1.7         | 6.1         | 1.1         | 2.0         | 2.7          |
| AF010670        |          | protein phosphatase 2C alpha 2                                     | 36435_at          | 6470        | protein amino acid dephosphorylation        | -1.6        | -1.1        | -1.1        | 1.9         | 1.0         | 5.7         | 1.6          |
| M25393          | A        | protein tyrosine phosphatase (PTPase)                              | 1264_at           | 6470        | protein amino acid dephosphorylation        | 1.0         | 1.1         | -1.5        | 3.3         | 2.1         | 3.2         | 2.7          |
| M93426          | A        | protein tyrosine phosphatase zeta-polypeptide                      | 1364_at           | 6470        | protein amino acid dephosphorylation        | -1.3        | 1.5         | -1.2        | 2.1         | 3.1         | 3.6         | 3.3          |
| AL049338        |          | DKFzP564P116                                                       | 33910_at          | 6470        | protein amino acid dephosphorylation        | 6.1         | 14.4        | -1.1        | 5.7         | 1.3         | 17.2        | 3.6          |
| Ai655015        | A        | wb66a10.x1 cDNA                                                    | 39932_at          | 6470        | protein amino acid dephosphorylation        | -1.2        | 1.8         | 2.3         | 1.3         | 2.9         | 2.9         | 4.1          |
| AJ236876        | A        | poly(ADP-ribose) polymerase-2                                      | 34755_at          | 6471        | protein amino acid ADP-ribosylation         | 1.0         | -1.2        | 1.2         | 1.0         | 1.5         | 1.9         | 2.7          |
| M63904          | A        | G-alpha 16 protein                                                 | 40365_at          | 6471        | protein amino acid ADP-ribosylation         | 1.2         | -1.2        | 1.0         | 1.0         | 1.5         | 1.5         | 2.8          |
| AF030424        | A        | histone acetyltransferase 1                                        | 41855_at          | 6475        | internal protein amino acid acetylation     | 1.4         | 1.0         | 1.3         | 1.4         | 1.5         | 2.6         | 3.9          |
| AF059531        | A        | protein arginine N-methyltransferase 3 (PRMT3)                     | 34998_at          | 6480        | N-terminal protein amino acid methylation   | -1.2        | 1.1         | -1.9        | 2.8         | 1.9         | 2.3         | 2.4          |
| Y15062          |          | GaT3 protein                                                       | 39293_at          | 6486        | protein amino acid glycosylation            | 4.1         | 1.2         | -2.1        | -1.2        | 6.9         | -1.2        | 1.2          |
| U14550          | B        | sialyltransferase STHM (sthn)                                      | 34693_at          | 6486        | protein amino acid glycosylation            | 1.0         | -1.1        | -2.0        | -1.8        | -2.3        | -2.7        | -2.8         |
| X87237          |          | mRNA for processing a-glucosidase I                                | 38464_at          | 6487        | N-linked glycosylation                      | 1.4         | 1.2         | 2.6         | 1.1         | 1.3         | -1.2        | -1.2         |
| X74837          |          | HUMM9                                                              | 39613_at          | 6487        | N-linked glycosylation                      | -3.6        | 2.6         | 1.3         | 1.5         | 1.5         | 1.9         | 2.4          |
| AF027156        |          | alpha 1,2-mannosidase IB                                           | 41298_at          | 6491        | N-glycan processing                         | -1.2        | 2.5         | -4.9        | 2.2         | 1.2         | 1.2         | -1.2         |
| U41514          | A        | UDP-GalNAc-polypeptide N-acetylgalactosaminyltransferase           | 38041_at          | 6493        | O-linked glycosylation                      | -1.1        | -1.1        | 1.0         | 2.6         | 2.0         | 1.8         | 1.2          |
| X51405          |          | carboxypeptidase E (EC 3.4.17.10)                                  | 36606_at          | 6508        | proteolysis and peptidolysis                | 1.2         | 1.2         | -2.6        | 1.8         | -1.2        | -2.6        | -1.9         |
| D79987          | A        | KIAA0165                                                           | 38159_at          | 6508        | proteolysis and peptidolysis                | 1.4         | -1.2        | -1.6        | 1.2         | 2.1         | 1.9         | 4.8          |
| AB019340        |          | KIAA0797                                                           | 33934_at          | 6508        | proteolysis and peptidolysis                | 1.0         | 1.1         | 1.4         | 3.0         | 1.4         | 1.0         | 1.7          |
| <b>X98172</b>   | <b>A</b> | <b>MACH-alpha-1 protein</b>                                        | <b>33774_at</b>   | <b>6508</b> | <b>proteolysis and peptidolysis</b>         | <b>-1.3</b> | <b>1.2</b>  | <b>1.4</b>  | <b>3.3</b>  | <b>1.7</b>  | <b>2.2</b>  | <b>1.6</b>   |
| AB012917        |          | serine protease (TLSP)                                             | 40035_at          | 6508        | proteolysis and peptidolysis                | -2.5        | -1.2        | -1.8        | -1.3        | -1.5        | -1.5        | -1.1         |
| X01060          |          | transferrin receptor                                               | 37324_at          | 6508        | proteolysis and peptidolysis                | 1.3         | 1.1         | 1.1         | 2.2         | 1.5         | -1.1        | -3.7         |
| D26579          | A        | transmembrane protein                                              | 40712_at          | 6508        | proteolysis and peptidolysis                | 1.3         | -1.2        | 1.7         | 2.4         | 3.4         | 3.0         | 7.4          |
| X71345          | A        | trypsinogen IV b-m                                                 | 40043_at          | 6508        | proteolysis and peptidolysis                | -1.6        | 1.8         | -1.1        | 1.2         | 2.0         | 1.9         | 4.6          |
| M63138          | B        | cathepsin D (catD)                                                 | 239_at            | 6508        | proteolysis and peptidolysis                | 1.3         | -1.4        | -2.3        | -2.9        | -1.9        | -3.9        | -1.7         |
| J03779          | B        | common acute lymphoblastic leukemia antigen                        | 1389_at           | 6508        | proteolysis and peptidolysis                | -1.1        | 1.2         | 1.2         | 1.1         | -2.0        | -2.5        | -3.2         |
| X17094          | A        | furin                                                              | 35338_at          | 6508        | proteolysis and peptidolysis                | 1.7         | 1.1         | 1.6         | 1.2         | 4.6         | 2.0         | 1.8          |
| L23808          |          | metalloproteinase (HME)                                            | 1481_at           | 6508        | proteolysis and peptidolysis                | -2.6        | 1.0         | 1.0         | 1.7         | -1.2        | -3.0        | 5.9          |
| M57888          |          | (clone lambda B34) cytotoxic T-lymphocyte-associated serine estera | 32370_at          | 6508        | proteolysis and peptidolysis                | -4.6        | -1.1        | 2.6         | 1.8         | 1.2         | -2.2        | -1.8         |
| M22488          | B        | bone morphogenetic protein 1 (BMP-1)                               | 39407_at          | 6508        | proteolysis and peptidolysis                | 3.6         | -1.3        | -1.7        | -3.2        | -2.1        | -4.8        | -1.6         |
| AB028639        |          | CAPN7 PalBH                                                        | 32517_at          | 6508        | proteolysis and peptidolysis                | 1.0         | 2.9         | 1.2         | 1.9         | -1.2        | -1.1        | -1.5         |
| AF005775        |          | caspase-like apoptosis regulatory protein                          | 1867_at           | 6508        | proteolysis and peptidolysis                | 1.2         | 1.4         | 1.7         | 2.6         | 1.6         | 1.0         | 1.7          |
| AL031985        | A        | DNA sequence from clone 228H13 on chromosome 1p34.1-35.3           | 35557_at          | 6508        | proteolysis and peptidolysis                | 1.1         | -1.1        | 4.1         | 2.8         | -1.4        | 1.1         | 40.9         |
| X63187          | B        | HE4 extracellular proteinase inhibitor homologue                   | 33933_at          | 6508        | proteolysis and peptidolysis                | 1.6         | -1.1        | -1.2        | -1.7        | -2.3        | -3.2        | -2.3         |
| M69136          |          | heart chymase                                                      | 33924_at          | 6508        | proteolysis and peptidolysis                | 1.4         | -1.9        | -2.8        | -2.2        | 1.3         | -2.3        | -1.0         |
| AF039704        | B        | lysosomal pepstatin insensitive protease (CLN2)                    | 32824_at          | 6508        | proteolysis and peptidolysis                | 1.2         | -1.4        | -2.7        | -3.4        | -2.3        | -3.0        | -1.4         |
| L13977          | B        | prolylcarboxypeptidase                                             | 36672_at          | 6508        | proteolysis and peptidolysis                | -1.3        | 1.3         | -1.1        | -1.8        | -2.7        | -3.1        | -3.0         |
| AF037204        |          | RING zinc finger protein (RZF)                                     | 35811_at          | 6508        | proteolysis and peptidolysis                | 1.0         | 1.2         | -2.5        | 1.4         | 1.4         | 1.3         | 1.6          |
| L33404          | B        | stratum corneum chymotryptic enzyme                                | 38143_at          | 6508        | proteolysis and peptidolysis                | -2.4        | 1.2         | -1.2        | -1.6        | -1.6        | -2.3        | -3.9         |

| GenBank     |       |                                                               | Affymetrix   |       |                                         | Fold Change |      |       |      |      |      |       |
|-------------|-------|---------------------------------------------------------------|--------------|-------|-----------------------------------------|-------------|------|-------|------|------|------|-------|
| Accession # | Group | Affymetric Gene Annotation                                    | Probe set id | GO id | GO Biological Process                   | 0           | 4    | 6     | 8    | 12   | 16   | 24    |
| U14394      |       | tissue inhibitor of metalloproteinases-3                      | 1034_at      | 6508  | proteolysis and peptidolysis            | 1.5         | 1.5  | 1.6   | 1.0  | 1.1  | -3.2 | -1.4  |
| AL049415    | A     | DKFZp586N2119                                                 | 33812_at     | 6508  | proteolysis and peptidolysis            | -1.1        | 1.8  | 1.0   | 1.4  | 4.9  | 2.8  | 1.6   |
| X64810      | B     | Homo Sapiens encoding PC1/PC3                                 | 40649_at     | 6508  | proteolysis and peptidolysis            | 1.4         | 1.0  | -1.6  | -1.9 | -2.0 | -2.5 | -3.2  |
| U66061      |       | trypsinogen C                                                 | 32796_f.at   | 6508  | proteolysis and peptidolysis            | -3.7        | -1.2 | 1.3   | -2.6 | 1.7  | 1.8  | 4.0   |
| N48190      |       | yz03f09.s1 cDNA                                               | 41254_at     | 6508  | proteolysis and peptidolysis            | -4.3        | 1.0  | 1.3   | 1.0  | 1.7  | -9.7 | 1.4   |
| D80012      |       | KIAA0190                                                      | 37683_at     | 6511  | ubiquitin-dependent protein catabolism  | 1.7         | 1.0  | 1.2   | 1.3  | 1.1  | 1.0  | 2.6   |
| AB014458    | A     | hUBP ubiquitin specific protease                              | 34383_at     | 6511  | ubiquitin-dependent protein catabolism  | 1.2         | 1.0  | 1.2   | 1.9  | 2.2  | 3.7  | 6.3   |
| U05340      | A     | p55CDC                                                        | 38414_at     | 6511  | ubiquitin-dependent protein catabolism  | 1.5         | 1.0  | 1.3   | 1.0  | 1.7  | 4.0  | 4.5   |
| D42055      | A     | KIAA0093                                                      | 32078_at     | 6512  | ubiquitin cycle                         | 1.1         | -1.1 | 1.2   | 1.5  | 1.2  | -1.2 | 3.8   |
| X85393      |       | aspartylglucosaminidase                                       | 34181_at     | 6517  | protein deglycosylation                 | -1.3        | 4.5  | 1.5   | 1.5  | 1.1  | -1.8 | -1.4  |
| U60337      | B     | beta-mannosidase                                              | 37472_at     | 6517  | protein deglycosylation                 | -1.5        | 1.1  | -1.1  | -1.2 | -1.1 | -1.5 | -3.1  |
| AJ011304    |       | sphingosine-1-phosphate lyase                                 | 35875_at     | 6520  | amino acid metabolism                   | -1.7        | 1.5  | -2.4  | -1.6 | 1.6  | -3.2 | -1.3  |
| Z18956      |       | taurine transporter                                           | 35121_at     | 6520  | amino acid metabolism                   | 4.1         | -1.9 | 1.4   | -1.2 | -1.1 | -1.4 | -1.1  |
| L00972      | A     | cystathionine-beta-synthase (CBS)                             | 38474_at     | 6520  | amino acid metabolism                   | -1.5        | 1.0  | 1.6   | 1.4  | -1.1 | 1.1  | 3.7   |
| S52028      |       | cystathionine gamma-lyase (clone HCL-1)                       | 32962_at     | 6520  | amino acid metabolism                   | 2.5         | -1.5 | 1.9   | -1.6 | 1.4  | 1.2  | 27.6  |
| M27396      |       | asparagine synthetase                                         | 36671_at     | 6529  | asparagine biosynthesis                 | 1.9         | -1.1 | -1.5  | -1.1 | -1.2 | -1.2 | 8.4   |
| L35546      |       | gamma-glutamylcysteine synthetase light subunit               | 33163_r.at   | 6534  | cysteine metabolism                     | -2.5        | 1.7  | -1.6  | 1.1  | 1.2  | 1.4  | 1.9   |
| L00972      | A     | cystathionine-beta-synthase (CBS)                             | 38474_at     | 6535  | cysteine biosynthesis from serine       | -1.5        | 1.0  | 1.6   | 1.4  | -1.1 | 1.1  | 3.7   |
| M81883      |       | glutamate decarboxylase (GAD67)                               | 37183_at     | 6540  | glutamate decarboxylation to succinate  | 2.5         | 1.1  | 2.0   | 3.1  | -1.3 | -2.1 | 8.5   |
| M27396      |       | asparagine synthetase                                         | 36671_at     | 6541  | glutamine metabolism                    | 1.9         | -1.1 | -1.5  | -1.1 | -1.2 | -1.2 | 8.4   |
| U00238      |       | glutamine PRPP amidotransferase (GPAT)                        | 34341_at     | 6541  | glutamine metabolism                    | 1.7         | -1.3 | 2.7   | 2.6  | -1.1 | 1.8  | 1.8   |
| AB020645    |       | KIAA0838                                                      | 34719_at     | 6543  | glutamine catabolism                    | 1.1         | -1.1 | -2.5  | 1.4  | 1.4  | 1.0  | 1.2   |
| J00140      |       | dihydrofolate reductase gene                                  | 37913_at     | 6545  | glycine biosynthesis                    | 1.5         | -1.1 | 1.0   | -1.3 | 1.0  | 5.9  | 1.8   |
| U19523      | A     | GTP cyclohydrolase I                                          | 37944_at     | 6559  | phenylalanine catabolism                | -1.2        | 1.2  | 1.1   | 1.8  | 2.9  | 2.1  | 3.5   |
| M34455      |       | interferon-gamma-inducible indoleamine 2,3-dioxygenase (IDO)  | 36904_at     | 6569  | tryptophan catabolism                   | -1.5        | 1.0  | 1.1   | 1.5  | 1.5  | -1.5 | 2.5   |
| M68940      | B     | monoamine oxidase A (MAOA)                                    | 41772_at     | 6584  | catecholamine metabolism                | -1.3        | 1.4  | -1.3  | -1.1 | -1.4 | -2.0 | -5.1  |
| AA420624    | B     | nc51c12.r1 cDNA                                               | 41771_g.at   | 6584  | catecholamine metabolism                | -1.1        | 1.2  | -1.4  | -1.2 | -1.8 | -2.5 | -4.5  |
| X16277      | A     | gene ornithine decarboxylase ODC (EC 4.1.1.17)                | 36203_at     | 6596  | polyamine biosynthesis                  | 1.3         | -1.4 | 1.1   | 1.8  | 1.5  | 1.7  | 2.8   |
| M33764      | A     | ornithine decarboxylase gene                                  | 1081_at      | 6596  | polyamine biosynthesis                  | 1.3         | -1.1 | -1.1  | 2.4  | 1.9  | 2.3  | 4.0   |
| S68805      |       | L-arginine-glycine amidotransferase                           | 36595_s.at   | 6601  | creatine biosynthesis                   | 1.0         | -1.6 | 1.2   | 2.1  | 1.1  | 3.0  | 2.2   |
| X97544      |       | TIM17 preprotein translocase                                  | 32829_at     | 6605  | protein targeting                       | 1.0         | 1.2  | 1.2   | 2.6  | 1.7  | 1.2  | 1.0   |
| AL031387    |       | dJ596C15.1 (novel protein) (isom 1)                           | 35136_at     | 6606  | protein-nucleus import                  | 1.6         | 1.0  | -3.2  | 1.2  | 1.2  | 1.5  | -1.6  |
| AF001862    | B     | FYN binding protein                                           | 41819_at     | 6607  | NLS-bearing substrate-nucleus import    | -1.9        | 1.2  | -3.3  | -1.2 | -1.8 | -3.1 | -20.9 |
| U28386      | A     | nuclear localization sequence receptor hSRP1alpha             | 40407_at     | 6607  | NLS-bearing substrate-nucleus import    | 1.3         | 1.2  | -2.3  | 1.2  | 1.7  | 2.3  | 3.5   |
| S75295      | A     | nucleoporin interactor 1=SRP1 homolog                         | 40474_r.at   | 6607  | NLS-bearing substrate-nucleus import    | 1.0         | 1.4  | 1.6   | 1.2  | 1.4  | 2.5  | 1.8   |
| X55954      |       | HL23 ribosomal protein homologue                              | 32394_s.at   | 6610  | ribosomal protein-nucleus import        | -3.2        | -1.5 | 1.1   | -3.0 | -2.0 | 2.5  | 1.2   |
| X55954      |       | HL23 ribosomal protein homologue                              | 32395_r.at   | 6610  | ribosomal protein-nucleus import        | -2.8        | -1.1 | 1.3   | -1.8 | -1.5 | 2.7  | -1.1  |
| X97544      |       | TIM17 preprotein translocase                                  | 32829_at     | 6628  | mitochondrial translocation             | 1.0         | 1.2  | 1.2   | 2.6  | 1.7  | 1.2  | 1.0   |
| AI130910    |       | qb81g08.x1 cDNA                                               | 37050_r.at   | 6628  | mitochondrial translocation             | -1.3        | 1.3  | -3.2  | 1.4  | 1.5  | 2.2  | 1.1   |
| D42108      |       | phospholipase C                                               | 1182_at      | 6629  | lipid metabolism                        | 6.8         | -1.2 | -1.2  | -2.2 | 1.2  | -2.5 | 1.0   |
| AB005038    | A     | 25-hydroxyvitamin D3 1-alpha-hydroxylase                      | 38909_at     | 6629  | lipid metabolism                        | 1.3         | -1.3 | 1.2   | 2.1  | 3.3  | 1.8  | 3.6   |
| Z75190      | A     | apolipoprotein E receptor 2                                   | 32398_s.at   | 6629  | lipid metabolism                        | 1.6         | 1.7  | 1.5   | 4.0  | 7.8  | 2.4  | 3.6   |
| O17770      | B     | KIAA0119                                                      | 37399_at     | 6629  | lipid metabolism                        | 1.1         | 1.4  | 1.2   | -1.3 | -1.2 | -1.2 | -3.1  |
| X05908      | A     | lipocortin                                                    | 37403_at     | 6629  | lipid metabolism                        | -1.2        | -1.2 | 1.3   | 1.3  | 1.0  | 1.4  | 2.8   |
| AB017566    |       | lipoyltransferase                                             | 37441_at     | 6629  | lipid metabolism                        | -1.7        | 3.3  | 2.7   | 2.8  | -1.5 | 2.8  | 5.1   |
| U37519      | B     | aldehyde dehydrogenase (ALDH8)                                | 37956_at     | 6629  | lipid metabolism                        | 1.7         | -1.6 | 1.0   | -2.2 | -2.4 | -4.6 | -1.1  |
| U65887      |       | CDP-diacylglycerol synthase                                   | 40217_s.at   | 6629  | lipid metabolism                        | 1.1         | 1.3  | -2.7  | 1.4  | 1.1  | -1.3 | 1.0   |
| M25915      | B     | complement cytolytic inhibitor (CLI)                          | 36780_at     | 6629  | lipid metabolism                        | 1.0         | -1.1 | 1.0   | -1.8 | -1.7 | -2.1 | -2.7  |
| D86407      |       | DNA apoER2                                                    | 40012_at     | 6629  | lipid metabolism                        | 14.0        | 1.0  | 1.5   | 3.9  | 2.9  | 2.6  | 4.6   |
| AF038007    |       | FIC1                                                          | 33634_at     | 6629  | lipid metabolism                        | 1.7         | 1.1  | 1.7   | 1.3  | 1.1  | -2.8 | -2.0  |
| AF039704    | B     | lysosomal pepstatin insensitive protease (CLN2)               | 32824_at     | 6629  | lipid metabolism                        | 1.2         | -1.4 | -2.7  | -3.4 | -2.3 | -3.0 | -1.4  |
| AF026977    |       | microsomal glutathione S-transferase 3 (MGST3)                | 39018_at     | 6629  | lipid metabolism                        | 1.3         | 1.4  | 2.6   | 1.1  | 1.0  | -1.2 | -1.7  |
| AF023462    |       | peroxisomal phytanoyl-CoA alpha-hydroxylase (PAHX)            | 32724_at     | 6629  | lipid metabolism                        | -2.2        | 1.3  | 1.1   | 1.3  | 1.0  | 1.2  | -2.5  |
| AF014402    | B     | type-2 phosphatidic acid phosphatase alpha-1 (PAP2-a1)        | 34797_at     | 6629  | lipid metabolism                        | 1.0         | 1.0  | -3.2  | -2.6 | -3.5 | -3.7 | -4.5  |
| AF027219    |       | ZNF202 beta (ZNF202)                                          | 38302_at     | 6629  | lipid metabolism                        | -1.4        | -1.2 | -1.2  | 3.3  | -1.3 | -1.5 | 2.6   |
| U70063      |       | acid ceramidase                                               | 36938_at     | 6631  | fatty acid metabolism                   | 1.0         | 1.4  | 1.1   | 1.1  | 1.5  | 1.1  | -2.5  |
| AF030555    | A     | acyl-CoA synthetase 4 (ACS4)                                  | 38099_r.at   | 6631  | fatty acid metabolism                   | 1.0         | 1.1  | -1.2  | 1.5  | 1.2  | 2.7  | 2.7   |
| M15856      | B     | lipoprotein lipase                                            | 41209_at     | 6631  | fatty acid metabolism                   | -1.4        | 1.0  | -3.5  | -2.0 | 1.5  | -1.5 | 1.0   |
| S79219      | B     | metastasis-associated gene                                    | 1348_s.at    | 6631  | fatty acid metabolism                   | 1.0         | 1.1  | -1.1  | 1.1  | -1.3 | -1.3 | -2.5  |
| AJ224538    |       | AMP-activated protein kinase beta 2 subunit                   | 36705_at     | 6633  | fatty acid biosynthesis                 | 1.3         | -1.1 | 1.3   | -1.2 | -1.2 | -1.6 | -2.5  |
| AF022116    |       | 5-AMP-activated protein kinase beta-1                         | 35348_at     | 6633  | fatty acid biosynthesis                 | 1.4         | 1.0  | -2.8  | -1.7 | -1.4 | -2.1 | 1.6   |
| X78706      | B     | carnitine acetyltransferase                                   | 41648_at     | 6637  | acyl-CoA metabolism                     | -1.5        | -1.1 | -1.7  | -2.1 | -1.8 | -2.5 | -4.1  |
| AF059202    |       | ACAT related gene product 1                                   | 34255_at     | 6641  | triacylglycerol metabolism              | 1.8         | -2.8 | -10.3 | -2.1 | -1.7 | -2.7 | 1.0   |
| U38545      |       | ARF-activated phosphatidylcholine-specific phos               | 177_at       | 6644  | phospholipid metabolism                 | -1.1        | -1.4 | 1.3   | -1.6 | -3.5 | -2.4 | -2.0  |
| U78575      | B     | 68 kDa type I phosphatidylinositol-4-phosphate 5-kinase alpha | 31833_at     | 6650  | glycerophospholipid metabolism          | 1.4         | -1.5 | -1.4  | 1.2  | -1.9 | -3.1 | 1.2   |
| U81802      | B     | PtdIns 4-kinase (PI4Kb)                                       | 146_at       | 6661  | phosphatidylinositol biosynthesis       | 1.5         | 1.0  | 1.1   | -1.1 | -1.6 | -2.8 | -1.5  |
| M72393      |       | calcium-dependent phospholipid-binding protein (PLA2)         | 35938_at     | 6663  | platelet activating factor biosynthesis | 1.3         | -1.2 | 1.6   | 3.9  | -1.4 | -1.6 | -1.8  |
| U70063      |       | acid ceramidase                                               | 36938_at     | 6672  | ceramide metabolism                     | 1.0         | 1.4  | 1.1   | 1.1  | 1.5  | 1.1  | -2.5  |
| D50840      |       | ceramide glucosyltransferase                                  | 40215_at     | 6679  | glycosylceramide biosynthesis           | -1.5        | 1.0  | 1.7   | 2.8  | 2.0  | 1.1  | 2.0   |
| X62078      | B     | GM2 activator protein                                         | 35820_at     | 6687  | glycosphingolipid metabolism            | 1.1         | -1.3 | -1.4  | -1.6 | -2.0 | -2.4 | -2.6  |
| X61094      |       | RNA GM2-activator protein (clone pGM2A)                       | 33645_at     | 6687  | glycosphingolipid metabolism            | 2.3         | 1.0  | 1.4   | -1.2 | -1.7 | -1.9 | -2.7  |
| AA224768    |       | nc12d09.r1 cDNA                                               | 33647_s.at   | 6687  | glycosphingolipid metabolism            | 1.6         | -1.2 | 1.0   | -1.4 | -2.2 | -3.1 | -3.5  |
| D50840      |       | ceramide glucosyltransferase                                  | 40215_at     | 6688  | glycosphingolipid biosynthesis          | -1.5        | 1.0  | 1.7   | 2.8  | 2.0  | 1.1  | 2.0   |
| AB018356    |       | GM3 synthase                                                  | 34256_at     | 6688  | glycosphingolipid biosynthesis          | 1.1         | 1.6  | 2.4   | 2.6  | 1.7  | 4.7  | 1.3   |
| M72393      |       | calcium-dependent phospholipid-binding protein (PLA2)         | 35938_at     | 6690  | icosanoid metabolism                    | 1.3         | -1.2 | 1.6   | 3.9  | -1.4 | -1.6 | -1.8  |
| D12820      |       | cytochrome P-450L TBV                                         | 1305_s.at    | 6691  | leukotriene metabolism                  | 1.1         | 1.4  | 1.0   | 2.3  | -1.5 | -2.6 | -1.5  |
| D17793      | B     | KIAA0119                                                      | 37399_at     | 6693  | prostaglandin metabolism                | 1.1         | 1.4  | 1.2   | -1.3 | -1.2 | -1.2 | -3.1  |
| U23942      |       | lanosterol 14-demethylase cytochrome P450 (CYP51)             | 33389_at     | 6695  | cholesterol biosynthesis                | -2.2        | 1.2  | -1.5  | 1.1  | 1.1  | 2.8  | -1.2  |
| AL049381    | B     | DKFZp586J2118                                                 | 33355_at     | 6700  | C21-steroid hormone biosynthesis        | 1.3         | -1.1 | 1.4   | -2.3 | 1.0  | -1.7 | -3.2  |

| GenBank     |       | Affymetrix                                                     |              |       | Fold Change                                   |      |      |       |      |      |       |      |
|-------------|-------|----------------------------------------------------------------|--------------|-------|-----------------------------------------------|------|------|-------|------|------|-------|------|
| Accession # | Group | Affymetric Gene Annotation                                     | Probe set id | GO id | GO Biological Process                         | 0    | 4    | 6     | 8    | 12   | 16    | 24   |
| D14874      |       | adrenomedullin precursor                                       | 34777_at     | 6701  | progesterone biosynthesis                     | -1.5 | 1.1  | -2.7  | -1.4 | -1.2 | -1.3  | -2.2 |
| U26726      | B     | 11-beta-hydroxysteroid dehydrogenase type 2                    | 39697_at     | 6704  | glucocorticoid biosynthesis                   | -1.2 | 1.0  | -1.7  | -2.3 | -3.4 | -11.3 | -7.1 |
| M54994      | B     | bile salt-activated lipase (BAL)                               | 39176_f_at   | 6707  | cholesterol catabolism                        | 1.4  | -1.7 | -3.8  | -5.2 | -4.5 | -9.1  | -4.9 |
| AB018293    | A     | KIAA0750                                                       | 40847_at     | 6725  | aromatic compound metabolism                  | 1.2  | -2.4 | 2.6   | 1.4  | 1.3  | 2.5   | 15.4 |
| U19523      | A     | GTP cyclohydrolase I                                           | 37944_at     | 6729  | tetrahydrobiopterin biosynthesis              | -1.2 | 1.2  | 1.1   | 1.8  | 2.9  | 2.1   | 3.5  |
| X16396      | A     | NAD-dependent methylene tetrahydrofolate dehydrogenase         | 40074_at     | 6730  | one-carbon compound metabolism                | 1.0  | 1.1  | 1.1   | 2.1  | 1.6  | 1.9   | 3.0  |
| J00140      |       | dihydrofolate reductase gene                                   | 37913_at     | 6730  | one-carbon compound metabolism                | 1.5  | -1.1 | 1.0   | -1.3 | 1.0  | 5.9   | 1.8  |
| D87002      |       | immunoglobulin lambda gene locus DNA                           | 715_s_at     | 6750  | glutathione biosynthesis                      | 1.5  | 1.0  | 2.7   | 1.1  | 1.0  | -1.5  | -1.2 |
| L35546      |       | gamma-glutamylcysteine synthetase light subunit                | 33163_r_at   | 6750  | glutathione biosynthesis                      | -2.5 | 1.7  | -1.6  | 1.1  | 1.2  | 1.4   | 1.9  |
| M25909      |       | endomembrane proton pump subunit                               | 32959_at     | 6754  | ATP biosynthesis                              | -1.4 | 1.1  | 1.9   | -1.3 | -1.3 | -2.6  | -2.3 |
| M11433      | B     | cellular retinol-binding protein                               | 38634_at     | 6776  | vitamin A metabolism                          | -4.7 | -1.3 | -2.7  | -1.4 | -1.1 | -1.3  | -2.4 |
| L36818      | B     | (clone 51C-3) 51C protein                                      | 36598_s_at   | 6796  | phosphate metabolism                          | 1.2  | -1.1 | -1.4  | -2.2 | -2.3 | -3.1  | -1.6 |
| AL049338    |       | DKFZp564P116                                                   | 33910_at     | 6796  | phosphate metabolism                          | 6.1  | 14.4 | -1.1  | 5.7  | 1.3  | 17.2  | 3.6  |
| AF017060    | A     | aldehyde oxidase (OAX-1)                                       | 37599_at     | 6800  | oxygen and reactive oxygen species metabolism | -1.6 | -1.1 | -1.2  | 1.1  | 1.0  | 2.9   | 2.3  |
| M32011      |       | neutrophil oxidase factor (p67-phox)                           | 41038_at     | 6801  | superoxide metabolism                         | -2.4 | 1.8  | -8.1  | 1.6  | 2.1  | 2.2   | 1.9  |
| L25879      | B     | p53/HEH epoxide hydrolase (EPHX)                               | 38790_at     | 6805  | xenobiotic metabolism                         | 1.2  | -1.3 | -1.6  | -2.3 | -1.7 | -4.2  | -2.9 |
| AF069987    |       | nitrlase 1 (NIT1)                                              | 39735_at     | 6807  | nitrogen metabolism                           | 1.3  | 1.2  | 1.0   | -1.1 | -1.2 | -1.3  | 2.6  |
| U31511      |       | inducible nitric oxide synthase (NOS), com                     | 1948_f_at    | 6809  | nitric oxide biosynthesis                     | 1.1  | -1.4 | -3.4  | 1.9  | 1.1  | -1.1  | 1.5  |
| U19523      | A     | GTP cyclohydrolase I                                           | 37944_at     | 6809  | nitric oxide biosynthesis                     | -1.2 | 1.2  | 1.1   | 1.8  | 2.9  | 2.1   | 3.5  |
| D88152      |       | acetyl-coenzyme A transporter                                  | 34668_at     | 6810  | transport                                     | 1.3  | 1.0  | -1.2  | 3.0  | 1.4  | 1.9   | -1.2 |
| AB019987    | A     | chromosome-associated polypeptide-C                            | 34878_at     | 6810  | transport                                     | 1.2  | 1.0  | -1.1  | 1.7  | 2.3  | 4.2   | 5.7  |
| D26443      | B     | glutamate transporter                                          | 36609_at     | 6810  | transport                                     | 1.1  | -1.2 | 1.2   | 1.6  | -1.4 | -1.4  | -2.5 |
| D83781      | A     | KIAA0197                                                       | 34253_at     | 6810  | transport                                     | 1.5  | 1.0  | -2.1  | 1.2  | 1.4  | 2.1   | 2.7  |
| X91220      |       | Na-Cl electroneutral thiazide-sensitive cotransporter          | 36362_at     | 6810  | transport                                     | -3.4 | -2.9 | 2.6   | -1.7 | -1.7 | 2.3   | -3.7 |
| M27543      |       | guanine nucleotide-binding protein (Gi)                        | 876_s_at     | 6810  | transport                                     | -1.2 | 1.9  | -2.7  | 3.6  | 2.6  | 1.0   | 1.0  |
| U63659      | A     | multidrug resistance-associated protein homolog                | 1930_at      | 6810  | transport                                     | -1.8 | -1.4 | 1.9   | 1.1  | 1.7  | 1.5   | 4.0  |
| AJ001014    | B     | RAMP1                                                          | 35668_at     | 6810  | transport                                     | 1.4  | 2.0  | -1.2  | -2.2 | -2.0 | -2.9  | 2.2  |
| M97815      |       | retinoic acid-binding protein II                               | 1057_at      | 6810  | transport                                     | -1.2 | -1.1 | 1.0   | -1.2 | -1.4 | -4.3  | -2.9 |
| AB001325    | B     | AQP3 gene aquaporin 3 (water channel)                          | 39249_at     | 6810  | transport                                     | 1.2  | 1.0  | 1.1   | -1.9 | -1.8 | -2.8  | -1.8 |
| AC002540    | A     | BAC clone GS025M02 from 7q21-q22                               | 38329_at     | 6810  | transport                                     | 1.0  | -1.5 | 1.4   | 2.0  | 3.2  | 3.6   | 1.9  |
| AC003083    |       | BAC clone RG060N22 from 7q21                                   | 35465_at     | 6810  | transport                                     | 9.1  | -1.3 | 1.0   | -1.3 | 1.0  | 1.3   | 1.4  |
| U49248      | B     | canalicular multispecific organic anion transporter (cMOAT)    | 33721_at     | 6810  | transport                                     | 1.0  | 1.1  | -2.7  | -1.2 | -1.6 | -1.4  | -6.4 |
| M11433      | B     | cellular retinol-binding protein                               | 38634_at     | 6810  | transport                                     | 4.7  | -1.3 | -2.7  | -1.4 | -1.1 | -1.3  | -2.4 |
| AF020043    | A     | chromosome-associated polypeptide (HCAP)                       | 34763_at     | 6810  | transport                                     | 1.1  | 1.5  | -1.1  | 2.2  | 1.8  | 1.7   | 3.0  |
| AF092563    | A     | chromosome-associated protein-E (hCAP-E)                       | 37502_at     | 6810  | transport                                     | -2.0 | 1.0  | 1.4   | 5.5  | 1.5  | 5.1   | 3.4  |
| AF038174    |       | clone 23579 sequence                                           | 32684_at     | 6810  | transport                                     | -1.6 | 2.5  | -5.3  | 2.3  | -1.1 | 2.2   | 3.0  |
| AF070606    | A     | clone 24411 sequence                                           | 34188_at     | 6810  | transport                                     | 1.9  | -1.1 | -1.7  | 2.5  | 2.0  | 1.6   | 3.2  |
| AF039022    | A     | exportin t                                                     | 38753_at     | 6810  | transport                                     | 1.2  | -1.3 | 1.2   | 2.5  | 1.2  | 2.0   | 2.6  |
| X96924      | B     | gene encoding mitochondrial citrate transport protein          | 38997_at     | 6810  | transport                                     | 1.4  | -1.3 | -2.7  | -1.7 | -1.4 | -1.7  | -1.8 |
| L77567      | B     | mitochondrial citrate transport protein (CTP)                  | 39825_at     | 6810  | transport                                     | 1.5  | -1.4 | 1.3   | -2.2 | -1.6 | -3.4  | -1.2 |
| L31801      |       | monocarboxylate transporter 1 (SLC16A1)                        | 36206_at     | 6810  | transport                                     | -1.1 | 1.4  | -2.5  | 2.3  | 3.4  | 2.6   | 1.3  |
| AF086992    | A     | multidrug resistance-associated protein 3B (MRP3)              | 33021_at     | 6810  | transport                                     | 2.0  | -1.7 | -2.1  | 1.0  | 1.8  | 2.9   | 6.9  |
| U16799      | B     | Na,K-ATPase beta-1 subunit                                     | 37669_s_at   | 6810  | transport                                     | 1.1  | 1.5  | -2.6  | -1.5 | -2.6 | -3.6  | -6.6 |
| U61849      |       | neuronal pentraxin 1 (NPTX1)                                   | 37921_at     | 6810  | transport                                     | -1.8 | 1.4  | 1.5   | 8.8  | 1.1  | -1.6  | -8.9 |
| J04027      | A     | plasma membrane Ca2+ pumping ATPase                            | 37661_at     | 6810  | transport                                     | -1.1 | 1.4  | 1.0   | 4.3  | 4.1  | 2.9   | 2.7  |
| M97815      | B     | retinoic acid-binding protein II (CRABP-II)                    | 41783_at     | 6810  | transport                                     | -1.7 | -1.3 | 1.0   | -1.7 | -2.7 | -3.5  | -3.0 |
| L78207      |       | sulfonylurea receptor (SUR1)                                   | 41792_at     | 6810  | transport                                     | 1.0  | -1.5 | 2.7   | -1.2 | -1.6 | -1.7  | 1.0  |
| J05068      |       | transcobalamin I                                               | 35919_at     | 6810  | transport                                     | -2.3 | -1.1 | -10.0 | 1.4  | -1.3 | -1.9  | 1.3  |
| AL030996    |       | dJ1189B24.4 (novel PUTATIVE protein)                           | 32124_at     | 6810  | transport                                     | -1.3 | 1.5  | 4.5   | 3.8  | 2.7  | 2.1   | 2.3  |
| U66672      |       | HSU66672 cDNA                                                  | 38574_at     | 6810  | transport                                     | 2.5  | 1.2  | 3.2   | -1.4 | 1.3  | 1.6   | -2.7 |
| AA978353    |       | oq40b07.s1 cDNA                                                | 41126_at     | 6810  | transport                                     | -1.2 | 1.1  | -1.5  | -4.9 | -1.2 | 1.1   | 6.8  |
| AI288757    |       | qm11h01.x1 cDNA                                                | 41793_at     | 6810  | transport                                     | 1.2  | 1.2  | 3.4   | 1.4  | -1.1 | -1.3  | -1.1 |
| AI762213    | B     | wi54d04.x1 cDNA                                                | 32821_at     | 6810  | transport                                     | -2.2 | -1.6 | -1.7  | -2.2 | -2.1 | -3.1  | -1.6 |
| H10201      |       | ym02c07.s1 cDNA                                                | 38328_at     | 6810  | transport                                     | -1.4 | 1.1  | -2.7  | 1.9  | 2.0  | 3.2   | 2.0  |
| AA059408    | A     | zl96e07.r1 cDNA                                                | 38430_at     | 6810  | transport                                     | -1.1 | 1.5  | -1.2  | 2.6  | 1.7  | 2.3   | 6.2  |
| X87159      | B     | beta subunit of epithelial amiloride-sensitive sodium channel  | 39682_at     | 6811  | ion transport                                 | 1.0  | 1.1  | -1.2  | -1.1 | -1.1 | -2.6  | -1.4 |
| X91220      |       | Na-Cl electroneutral thiazide-sensitive cotransporter          | 36362_at     | 6811  | ion transport                                 | -3.4 | -2.9 | 2.6   | -1.7 | -1.7 | 2.3   | -3.7 |
| U26249      | B     | 11kd protein                                                   | 39087_at     | 6811  | ion transport                                 | 1.1  | -1.1 | -1.6  | -1.2 | -1.8 | -3.6  | -2.3 |
| AF022797    |       | intermediate conductance calcium-activated potassium channel   | 41106_at     | 6811  | ion transport                                 | 1.0  | -1.1 | 3.2   | 1.1  | 1.1  | 1.4   | 2.6  |
| U33632      |       | Two P-domain K+ channel TWIK-1                                 | 37552_at     | 6811  | ion transport                                 | 1.1  | 1.2  | -1.6  | 1.4  | 1.2  | 2.5   | 1.2  |
| AB018258    |       | KIAA0715                                                       | 37415_at     | 6812  | cation transport                              | -1.2 | 1.0  | 1.3   | -1.2 | 1.0  | -2.7  | -1.8 |
| X89066      | A     | TRPC1 protein                                                  | 39123_s_at   | 6812  | cation transport                              | 1.2  | -1.1 | 1.2   | 1.5  | -1.3 | 4.2   | 8.0  |
| AF070606    | A     | clone 24411 sequence                                           | 34188_at     | 6812  | cation transport                              | 1.9  | -1.1 | -1.7  | 2.5  | 2.0  | 1.6   | 3.2  |
| AF038007    |       | FIC1                                                           | 33634_at     | 6812  | cation transport                              | 1.7  | 1.1  | 1.7   | 1.3  | 1.1  | -2.8  | 2.0  |
| J04027      | A     | plasma membrane Ca2+ pumping ATPase                            | 37661_at     | 6812  | cation transport                              | -1.1 | 1.4  | 1.0   | 4.3  | 4.1  | 2.9   | 2.7  |
| Z24724      | A     | polyA site DNA                                                 | 34857_at     | 6812  | cation transport                              | -1.5 | -1.2 | -1.3  | 3.3  | 2.3  | 3.7   | 4.2  |
| U48508      |       | skeletal muscle ryanodine receptor gene (RYR1), promoter regio | 37990_at     | 6812  | cation transport                              | 1.3  | -1.1 | -1.4  | -3.2 | 2.4  | -2.0  | 1.0  |
| AF022797    |       | intermediate conductance calcium-activated potassium channel   | 41106_at     | 6813  | potassium ion transport                       | 1.0  | -1.1 | 3.2   | 1.1  | 1.1  | 1.4   | 2.6  |
| U16799      | B     | Na,K-ATPase beta-1 subunit                                     | 37669_s_at   | 6813  | potassium ion transport                       | 1.1  | 1.5  | -2.4  | -1.5 | -2.6 | -3.6  | -6.6 |
| L78207      |       | sulfonylurea receptor (SUR1)                                   | 41792_at     | 6813  | potassium ion transport                       | 1.0  | -1.5 | 2.7   | -1.2 | -1.6 | -1.7  | 1.0  |
| AI288757    |       | qm11h01.x1 cDNA                                                | 41793_at     | 6813  | potassium ion transport                       | 1.2  | 1.2  | 3.4   | 1.4  | -1.1 | -1.3  | -1.1 |
| U33632      |       | Two P-domain K+ channel TWIK-1                                 | 37552_at     | 6813  | potassium ion transport                       | 1.1  | 1.2  | -1.6  | 1.4  | 1.2  | 2.5   | 1.2  |
| Y10032      | B     | putative serine/threonine protein kinase                       | 973_at       | 6814  | sodium ion transport                          | 1.5  | -1.2 | 1.7   | -1.4 | -1.2 | -2.3  | -3.0 |
| X87159      | B     | beta subunit of epithelial amiloride-sensitive sodium channel  | 39682_at     | 6814  | sodium ion transport                          | 1.0  | 1.1  | -1.2  | -1.1 | -1.1 | -2.6  | -1.4 |
| X91220      |       | Na-Cl electroneutral thiazide-sensitive cotransporter          | 36362_at     | 6814  | sodium ion transport                          | -3.4 | -2.9 | 2.6   | -1.7 | -1.7 | 2.3   | -3.7 |
| U16799      | B     | Na,K-ATPase beta-1 subunit                                     | 37669_s_at   | 6814  | sodium ion transport                          | 1.1  | 1.5  | -2.4  | -1.5 | -2.6 | -3.6  | -6.6 |
| X89066      | A     | TRPC1 protein                                                  | 39123_s_at   | 6816  | calcium ion transport                         | 1.2  | -1.1 | 1.2   | 1.5  | -1.3 | 4.2   | 8.0  |
| AF070606    | A     | clone 24411 sequence                                           | 34188_at     | 6816  | calcium ion transport                         | 1.9  | -1.1 | -1.7  | 2.5  | 2.0  | 1.6   | 3.2  |
| J04027      | A     | plasma membrane Ca2+ pumping ATPase                            | 37661_at     | 6816  | calcium ion transport                         | -1.1 | 1.4  | 1.0   | 4.3  | 4.1  | 2.9   | 2.7  |



| GenBank         | Group    | Affymetric Gene Annotation                                           | Affymetric Probe set id | GO id       | GO Biological Process              |             |            | Fold Change |             |             |             |              |  |  |
|-----------------|----------|----------------------------------------------------------------------|-------------------------|-------------|------------------------------------|-------------|------------|-------------|-------------|-------------|-------------|--------------|--|--|
| Accession #     |          |                                                                      |                         |             |                                    | 0           | 4          | 6           | 8           | 12          | 16          | 24           |  |  |
| U48508          |          | skeletal muscle ryanodine receptor gene (RYR1), promoter region      | 37990_at                | 6816        | calcium ion transport              | 1.3         | -1.1       | -1.4        | -3.2        | 2.4         | -2.0        | 1.0          |  |  |
| X91220          |          | Na-Cl electroneutral thiazide-sensitive cotransporter                | 36362_at                | 6821        | chloride transport                 | -3.4        | -2.9       | 2.6         | -1.7        | -1.7        | 2.3         | -3.7         |  |  |
| U28249          | B        | 11kd protein                                                         | 39087_at                | 6821        | chloride transport                 | 1.1         | -1.1       | -1.6        | -1.2        | -1.8        | -3.6        | -2.3         |  |  |
| J05068          |          | transcobalamin I                                                     | 35919_at                | 6824        | cobalt ion transport               | -2.3        | -1.1       | -10.0       | 1.4         | -1.3        | -1.9        | 1.3          |  |  |
| X01060          |          | transferrin receptor                                                 | 37324_at                | 6826        | iron ion transport                 | 1.3         | 1.1        | 1.1         | 2.2         | 1.5         | -1.1        | -3.7         |  |  |
| U60319          |          | haemochromatosis protein (HLA-H)                                     | 38913_at                | 6826        | iron ion transport                 | 3.5         | 1.2        | 1.3         | 1.1         | -2.5        | -1.2        | -1.1         |  |  |
| X91249          | A        | white gene protein                                                   | 41362_at                | 6832        | small molecule transport           | 1.0         | 2.4        | 1.5         | 2.4         | 3.0         | 1.1         | 2.0          |  |  |
| D26443          | B        | glutamate transporter                                                | 36609_at                | 6835        | dicarboxylic acid transport        | 1.1         | -1.2       | 1.2         | 1.6         | -1.4        | -1.4        | -2.5         |  |  |
| AA538353        |          | oq40b07.s1 cDNA                                                      | 41126_at                | 6835        | dicarboxylic acid transport        | -1.2        | 1.1        | -1.5        | -4.9        | -1.2        | 1.1         | 6.8          |  |  |
| Z18656          |          | taurine transporter                                                  | 35121_at                | 6836        | neurotransmitter transport         | -4.1        | -1.9       | 1.4         | -1.2        | -1.1        | -1.4        | -1.1         |  |  |
| L37792          | A        | syntaxin 1A                                                          | 37184_at                | 6836        | neurotransmitter transport         | 1.2         | -1.5       | 1.9         | 1.7         | 2.0         | -1.2        | 3.0          |  |  |
| S75989          |          | gamma-aminobutyric acid transporter type 3                           | 32990_at                | 6836        | neurotransmitter transport         | -1.1        | 1.3        | 2.9         | 1.3         | 1.2         | -1.1        | 1.3          |  |  |
| X96924          | B        | gene encoding mitochondrial citrate transport protein                | 38997_at                | 6843        | mitochondrial citrate transport    | 1.4         | -1.3       | -2.7        | -1.7        | -1.4        | -1.7        | -1.8         |  |  |
| L77567          | B        | mitochondrial citrate transport protein (CTP)                        | 39825_at                | 6843        | mitochondrial citrate transport    | 1.5         | -1.4       | 1.3         | -2.2        | -1.6        | -3.4        | -1.2         |  |  |
| X91220          |          | Na-Cl electroneutral thiazide-sensitive cotransporter                | 36362_at                | 6865        | amino acid transport               | -3.4        | -2.9       | 2.6         | -1.7        | -1.7        | 2.3         | -3.7         |  |  |
| AF070578        |          | clone 24674 sequence                                                 | 36758_at                | 6865        | amino acid transport               | 1.7         | -2.7       | 1.6         | 1.4         | 3.4         | 1.1         | -1.8         |  |  |
| AA290994        |          | zs45d07.r1 cDNA                                                      | 40923_at                | 6865        | amino acid transport               | -1.1        | 1.3        | -1.1        | -2.9        | 2.1         | 1.9         | 2.7          |  |  |
| AB005038        | A        | 25-hydroxyvitamin D3 1-alpha-hydroxylase                             | 38909_at                | 6874        | calcium ion homeostasis            | 1.3         | -1.3       | 1.2         | 2.1         | 3.3         | 1.8         | 3.6          |  |  |
| X72308          |          | monocyte chemoattractant protein-3 (MCP-3)                           | 39802_at                | 6874        | calcium ion homeostasis            | -1.8        | -1.2       | -1.8        | -3.6        | -1.2        | -1.9        | 1.0          |  |  |
| U25997          |          | stanniocalcin precursor (STC)                                        | 41354_at                | 6874        | calcium ion homeostasis            | -4.2        | -2.5       | -2.1        | -1.2        | 2.7         | 2.5         | 2.1          |  |  |
| M13699          | B        | ceruloplasmin (ferroxidase)                                          | 39008_at                | 6878        | copper ion homeostasis             | -1.1        | -1.1       | -1.2        | 2.0         | -1.8        | 1.4         | -6.1         |  |  |
| <b>V00568</b>   |          | <b>encoding the c-myc oncogene</b>                                   | <b>1973_s_at</b>        | <b>6879</b> | <b>iron ion homeostasis</b>        | <b>1.0</b>  | <b>1.0</b> | <b>4.4</b>  | <b>1.8</b>  | <b>1.5</b>  | <b>1.3</b>  | <b>4.5</b>   |  |  |
| X01060          |          | transferrin receptor                                                 | 37324_at                | 6879        | iron ion homeostasis               | 1.3         | 1.1        | 1.1         | 2.2         | 1.5         | -1.1        | -3.7         |  |  |
| M13699          | B        | ceruloplasmin (ferroxidase)                                          | 39008_at                | 6879        | iron ion homeostasis               | -1.1        | -1.1       | -1.2        | 2.0         | -1.8        | 1.4         | -6.1         |  |  |
| <b>V00568</b>   | <b>A</b> | <b>c-myc oncogene</b>                                                | <b>37724_at</b>         | <b>6879</b> | <b>iron ion homeostasis</b>        | <b>-1.2</b> | <b>1.3</b> | <b>2.5</b>  | <b>2.1</b>  | <b>1.6</b>  | <b>1.9</b>  | <b>3.6</b>   |  |  |
| U60319          |          | haemochromatosis protein (HLA-H)                                     | 38913_at                | 6879        | iron ion homeostasis               | 3.5         | 1.2        | 1.3         | 1.1         | -2.6        | -1.2        | -1.1         |  |  |
| AL031670        |          | similar to Zinc finger, C3HC4 type (RING finger)                     | 35083_at                | 6879        | iron ion homeostasis               | -6.6        | 1.3        | 2.7         | -2.1        | 1.3         | -1.1        | 11.3         |  |  |
| AJ006973        |          | TOM1 protein                                                         | 39134_at                | 6886        | intracellular protein transport    | 1.0         | 1.0        | 1.5         | -1.8        | -1.4        | -2.6        | -2.0         |  |  |
| AJ010071        |          | TOM1-like protein                                                    | 40229_at                | 6886        | intracellular protein transport    | 1.0         | 1.2        | -1.3        | 1.2         | -2.1        | -1.1        | 2.8          |  |  |
| U39412          | B        | alpha SNAP                                                           | 36977_at                | 6886        | intracellular protein transport    | 1.2         | 1.0        | 1.0         | -1.7        | -1.7        | -2.7        | -1.6         |  |  |
| AF023268        |          | clk2 kinase (CLK2)                                                   | 32799_at                | 6886        | intracellular protein transport    | 1.1         | -1.5       | -2.6        | -1.5        | -1.4        | -1.6        | 1.2          |  |  |
| U74324          |          | guanine nucleotide exchange factor mss4                              | 38264_at                | 6886        | intracellular protein transport    | -1.5        | 1.7        | -1.3        | 1.1         | 1.0         | 3.1         | 1.3          |  |  |
| AF048755        |          | HsPex13p (PEX13)                                                     | 37464_at                | 6886        | intracellular protein transport    | -1.2        | 3.7        | 1.6         | 1.0         | 1.7         | -1.4        | -2.0         |  |  |
| U28386          | A        | nuclear localization sequence receptor hSRP1alpha                    | 40407_at                | 6886        | intracellular protein transport    | 1.3         | 1.2        | -2.3        | 1.2         | 1.7         | 2.3         | 3.5          |  |  |
| U57629          | A        | retinitis pigmentosa GTPase regulator (RPGR)                         | 38164_at                | 6886        | intracellular protein transport    | 1.2         | -2.1       | 1.6         | 2.5         | 1.5         | 1.9         | 3.0          |  |  |
| AF042273        |          | signal transducing adaptor molecule 2A (STAM2)                       | 38525_at                | 6886        | intracellular protein transport    | -1.1        | -1.7       | -5.5        | 1.3         | 1.1         | -1.7        | 1.2          |  |  |
| L37792          | A        | syntaxin 1A                                                          | 37184_at                | 6886        | intracellular protein transport    | 1.2         | -1.5       | 1.9         | 1.7         | 2.0         | -1.2        | 3.0          |  |  |
| AL049758        |          | dJ437M21.3 novel Src homology domain 3                               | 35886_at                | 6886        | intracellular protein transport    | 1.4         | 1.8        | 4.0         | 1.0         | -2.6        | -2.2        | 1.1          |  |  |
| AL031387        | B        | dJ596C15.1.1 (novel protein) (isom 1)                                | 35136_at                | 6886        | intracellular protein transport    | 1.6         | 1.0        | -3.2        | 1.2         | 1.2         | 1.5         | -1.6         |  |  |
| AL050148        | B        | DKFZp586G1520                                                        | 35645_at                | 6886        | intracellular protein transport    | -1.7        | -1.5       | -1.4        | -1.2        | -1.4        | -1.2        | -4.4         |  |  |
| S75295          | A        | nucleoprotein interactor 1-SRP1 homolog                              | 40474_r_at              | 6886        | intracellular protein transport    | 1.0         | 1.4        | 1.6         | 1.2         | 1.4         | 2.5         | 1.8          |  |  |
| AI653878        |          | tn30a05.x1 cDNA                                                      | 41450_at                | 6886        | intracellular protein transport    | -1.1        | 1.1        | -1.1        | 1.9         | 1.5         | 2.8         | -1.2         |  |  |
| AA402332        |          | zu48n12.s1 cDNA                                                      | 39805_l_at              | 6886        | intracellular protein transport    | -4.7        | 1.6        | 1.2         | 1.8         | -5.8        | 1.2         | -1.2         |  |  |
| L37792          | A        | syntaxin 1A                                                          | 37184_at                | 6887        | exocytosis                         | 1.2         | -1.5       | 1.9         | 1.7         | 2.0         | -1.2        | 3.0          |  |  |
| AA203187        | A        | zx55f06.r1 cDNA                                                      | 38305_at                | 6887        | exocytosis                         | -1.2        | 1.0        | -1.1        | -1.4        | 1.0         | 1.9         | 3.4          |  |  |
| AI653878        |          | tn30a05.x1 cDNA                                                      | 41450_at                | 6888        | ER to Golgi transport              | -1.1        | 1.1        | -1.1        | 1.9         | 1.5         | 2.8         | -1.2         |  |  |
| D87435          | B        | KIAA0245                                                             | 40123_at                | 6890        | retrograde (Golgi to ER) transport | -1.1        | 1.0        | -1.2        | -2.6        | -1.6        | -2.5        | -1.3         |  |  |
| AJ010071        |          | TOM1-like protein                                                    | 40229_at                | 6891        | intra-Golgi transport              | 1.0         | 1.2        | -1.3        | 1.2         | -2.1        | -1.1        | 2.8          |  |  |
| U39412          | B        | alpha SNAP                                                           | 36977_at                | 6891        | intra-Golgi transport              | 1.2         | 1.0        | 1.0         | -1.7        | -1.7        | -2.7        | -1.6         |  |  |
| AF023268        |          | clk2 kinase (CLK2)                                                   | 32799_at                | 6892        | post-Golgi transport               | 1.1         | -1.5       | -2.6        | -1.5        | -1.4        | -1.6        | 1.2          |  |  |
| AB023203        | A        | KIAA0986                                                             | 40000_f_at              | 6895        | Golgi to endosome transport        | 1.0         | -1.9       | -1.2        | 2.8         | 2.5         | 2.1         | 1.4          |  |  |
| X01060          |          | transferrin receptor                                                 | 37324_at                | 6897        | endocytosis                        | 1.3         | 1.1        | 1.1         | 2.2         | 1.5         | -1.1        | -3.7         |  |  |
| U61167          | A        | SH3 domain-containing protein SH3P18                                 | 174_s_at                | 6897        | endocytosis                        | 1.2         | 1.2        | 1.6         | 2.6         | 1.3         | 2.2         | 1.5          |  |  |
| X75621          | B        | TSC2 tuberin                                                         | 38813_at                | 6897        | endocytosis                        | 1.4         | -1.7       | -1.5        | -2.4        | -1.9        | -3.0        | -2.5         |  |  |
| AL049758        |          | dJ437M21.3 novel Src homology domain 3                               | 35886_at                | 6897        | endocytosis                        | 1.4         | 1.8        | 4.0         | 1.0         | -2.6        | -2.2        | 1.1          |  |  |
| AL050148        | B        | DKFZp586G1520                                                        | 35645_at                | 6897        | endocytosis                        | -1.7        | -1.5       | -1.4        | -1.2        | -1.4        | -1.2        | -4.4         |  |  |
| U81802          | B        | PtdIns 4-kinase (PI4Kb)                                              | 146_at                  | 6898        | receptor mediated endocytosis      | 1.5         | 1.0        | 1.1         | -1.1        | -1.6        | -2.8        | -1.5         |  |  |
| U60319          |          | haemochromatosis protein (HLA-H)                                     | 38913_at                | 6898        | receptor mediated endocytosis      | 3.5         | 1.2        | 1.3         | 1.1         | -2.5        | -1.2        | -1.1         |  |  |
| AJ006973        |          | TOM1 protein                                                         | 39134_at                | 6899        | nonselective vesicle transport     | 1.0         | 1.0        | 1.5         | -1.8        | -1.4        | -2.6        | -2.0         |  |  |
| AJ010071        |          | TOM1-like protein                                                    | 40229_at                | 6899        | nonselective vesicle transport     | 1.0         | 1.2        | -1.3        | 1.2         | -2.1        | -1.1        | 2.8          |  |  |
| U13616          | B        | ankyrin G (ANK-3)                                                    | 36965_at                | 6899        | nonselective vesicle transport     | -1.4        | 1.2        | -1.1        | -1.1        | -1.8        | -1.8        | -2.8         |  |  |
| U74324          |          | guanine nucleotide exchange factor mss4                              | 38264_at                | 6899        | nonselective vesicle transport     | -1.5        | 1.7        | -1.3        | 1.1         | 1.0         | 3.1         | 1.3          |  |  |
| AB007860        | A        | KIAA0400                                                             | 39410_at                | 6899        | nonselective vesicle transport     | 1.1         | 1.3        | -1.5        | 2.1         | 1.4         | 1.6         | 2.6          |  |  |
| AF035621        |          | kinesin-related protein (KIF3C)                                      | 33345_at                | 6899        | nonselective vesicle transport     | -1.3        | -1.6       | 1.0         | -2.7        | -2.2        | -1.2        | -1.4         |  |  |
| L37792          | A        | syntaxin 1A                                                          | 37184_at                | 6899        | nonselective vesicle transport     | 1.2         | -1.5       | 1.9         | 1.7         | 2.0         | -1.2        | 3.0          |  |  |
| U26648          | B        | syntaxin 5                                                           | 40068_at                | 6903        | nonselective vesicle targeting     | 1.1         | 1.2        | -1.2        | -1.1        | -2.5        | -3.5        | -1.3         |  |  |
| AA151922        |          | zo30d07.r1 cDNA                                                      | 32721_at                | 6914        | autophagy                          | 1.6         | -1.2       | -3.3        | 1.7         | -1.2        | -1.2        | 1.8          |  |  |
| Y10032          | B        | putative serine/threonine protein kinase                             | 973_at                  | 6915        | apoptosis                          | 1.5         | -1.2       | 1.7         | -1.4        | -1.2        | -2.3        | -3.0         |  |  |
| <b>AB013382</b> | <b>A</b> | <b>DUSP6</b>                                                         | <b>41193_at</b>         | <b>6915</b> | <b>apoptosis</b>                   | <b>1.2</b>  | <b>1.2</b> | <b>16.2</b> | <b>24.1</b> | <b>26.3</b> | <b>31.3</b> | <b>143.4</b> |  |  |
| D79987          | A        | KIAA0165                                                             | 38158_at                | 6915        | apoptosis                          | 1.4         | -1.2       | -1.6        | 1.2         | 2.1         | 1.9         | 4.8          |  |  |
| L06797          | B        | (clone L5) orphan G protein-coupled receptor                         | 649_s_at                | 6915        | apoptosis                          | 1.5         | 1.2        | -1.4        | -1.8        | -1.2        | -1.4        | -2.6         |  |  |
| <b>U84388</b>   | <b>A</b> | <b>death domain containing protein CRADD</b>                         | <b>1211_s_at</b>        | <b>6915</b> | <b>apoptosis</b>                   | <b>-1.3</b> | <b>1.3</b> | <b>-1.3</b> | <b>2.7</b>  | <b>1.5</b>  | <b>1.4</b>  | <b>1.4</b>   |  |  |
| <b>M60974</b>   | <b>A</b> | <b>growth arrest and DNA-damage-inducible protein</b>                | <b>1911_s_at</b>        | <b>6915</b> | <b>apoptosis</b>                   | <b>1.2</b>  | <b>1.1</b> | <b>-1.2</b> | <b>2.1</b>  | <b>1.5</b>  | <b>1.6</b>  | <b>4.5</b>   |  |  |
| M57888          |          | (clone lambda B34) cytotoxic T-lymphocyte-associated serine esterase | 32370_at                | 6915        | apoptosis                          | -4.6        | -1.1       | 2.6         | 1.8         | 1.2         | -2.2        | -1.8         |  |  |
| L19872          |          | AH-receptor                                                          | 40516_at                | 6915        | apoptosis                          | 1.4         | -1.8       | -1.2        | 1.9         | 1.3         | 1.4         | 3.2          |  |  |
| U97067          | A        | alpha-catenin-like protein                                           | 35331_at                | 6915        | apoptosis                          | 1.0         | -1.1       | 2.1         | 1.7         | 1.4         | 2.9         | 2.1          |  |  |
| <b>U43746</b>   | <b>A</b> | <b>breast cancer susceptibility (BRCA2)</b>                          | <b>1989_at</b>          | <b>6915</b> | <b>apoptosis</b>                   | <b>-2.3</b> | <b>1.3</b> | <b>1.6</b>  | <b>-1.3</b> | <b>1.6</b>  | <b>3.2</b>  | <b>6.7</b>   |  |  |
| M25915          | B        | complement cytotoxicity inhibitor (CLI)                              | 36780_at                | 6915        | apoptosis                          | 1.0         | -1.1       | 1.0         | -1.8        | -1.7        | -2.1        | -2.7         |  |  |
| X76104          | B        | DAP-kinase                                                           | 40049_at                | 6915        | apoptosis                          | 1.2         | 1.5        | -1.2        | -2.0        | -1.2        | -1.4        | -2.6         |  |  |

| GenBank       | Group    | Affymetric Gene Annotation                                      | Affymetric Probe set id | GO id       | GO Biological Process            | 0           | 4           | 6           | 8           | 12          | 16          | 24          |
|---------------|----------|-----------------------------------------------------------------|-------------------------|-------------|----------------------------------|-------------|-------------|-------------|-------------|-------------|-------------|-------------|
| U75744        |          | DNase gamma 4                                                   | 37972_at                | 6915        | apoptosis                        | -1.5        | 1.2         | 1.3         | -1.7        | 1.0         | -3.1        | 1.5         |
| AF001294      | A        | IPL (IPL)                                                       | 31888_s_at              | 6915        | apoptosis                        | -1.3        | 1.5         | 1.2         | 1.7         | 2.3         | 2.7         | 1.8         |
| U67156        | A        | mitogen-activated kinase kinase 5 (MAPKKK5)                     | 1327_s_at               | 6915        | apoptosis                        | -1.8        | 1.8         | -1.2        | 2.9         | 2.3         | 2.1         | 1.6         |
| X80200        | B        | MLN62                                                           | 37912_at                | 6915        | apoptosis                        | 1.3         | -2.0        | -1.2        | -1.7        | -2.1        | -2.6        | 1.0         |
| U63909        | A        | prostate apoptosis response protein par-4                       | 40621_at                | 6915        | apoptosis                        | -1.1        | -1.2        | 1.0         | 2.7         | 1.5         | 1.5         | 1.9         |
| AL049932      |          | DKFZp564H2416                                                   | 39510_r_at              | 6915        | apoptosis                        | -2.0        | 1.7         | -2.6        | 1.2         | -1.3        | -1.4        | -1.6        |
| <b>S81914</b> | <b>A</b> | <b>radiation-inducible immediate-early gene</b>                 | <b>1237_at</b>          | <b>6915</b> | <b>apoptosis</b>                 | <b>1.0</b>  | <b>1.2</b>  | <b>3.5</b>  | <b>3.1</b>  | <b>3.7</b>  | <b>4.7</b>  | <b>8.5</b>  |
| AI692348      | B        | w685g12.x1_cDNA                                                 | 39509_at                | 6915        | apoptosis                        | 1.5         | 1.1         | 1.2         | 1.4         | -1.2        | -1.6        | -2.6        |
| AA151922      |          | zo3007.r1_cDNA                                                  | 32721_at                | 6915        | apoptosis                        | 1.6         | -1.2        | -3.3        | 1.7         | -1.2        | -1.2        | 1.8         |
| X13293        |          | B-myb gene                                                      | 1654_at                 | 6916        | anti-apoptosis                   | 2.2         | -1.3        | 1.0         | 1.1         | 3.1         | 1.3         | 2.6         |
| <b>X89101</b> |          | <b>Fas (Apo-1, CD95)</b>                                        | <b>1808_s_at</b>        | <b>6916</b> | <b>anti-apoptosis</b>            | <b>1.7</b>  | <b>-1.3</b> | <b>2.0</b>  | <b>1.8</b>  | <b>1.2</b>  | <b>5.7</b>  | <b>-1.1</b> |
| <b>X83490</b> |          | <b>Fas/Apo-1</b>                                                | <b>1440_s_at</b>        | <b>6916</b> | <b>anti-apoptosis</b>            | <b>-1.1</b> | <b>-1.1</b> | <b>3.9</b>  | <b>1.7</b>  | <b>1.4</b>  | <b>1.6</b>  | <b>1.4</b>  |
| Y00630        | A        | Arg-Serpin (plasminogen activator-inhibitor 2, PAI-2)           | 37185_at                | 6916        | anti-apoptosis                   | -1.5        | -1.1        | 1.0         | -1.1        | 2.4         | 3.5         | 3.1         |
| X83492        |          | Fas/Apo-1                                                       | 1441_s_at               | 6916        | anti-apoptosis                   | -1.9        | -1.5        | -2.2        | 2.5         | 1.0         | 3.1         | 1.8         |
| Y15906        |          | XAGL protein                                                    | 41269_r_at              | 6916        | anti-apoptosis                   | -1.4        | -1.8        | 1.3         | 2.5         | 1.3         | 1.9         | -1.2        |
| <b>M38449</b> | <b>B</b> | <b>transforming growth factor-beta , complete</b>               | <b>1830_s_at</b>        | <b>6916</b> | <b>anti-apoptosis</b>            | <b>1.2</b>  | <b>-1.6</b> | <b>1.2</b>  | <b>-1.9</b> | <b>-1.5</b> | <b>-2.8</b> | <b>-1.1</b> |
| U75285        | A        | apoptosis inhibitor survivin gene                               | 40532_at                | 6916        | anti-apoptosis                   | 2.4         | 1.9         | 2.4         | 1.2         | 2.1         | 1.5         | 4.7         |
| Z23115        |          | bcl-xL                                                          | 1615_at                 | 6916        | anti-apoptosis                   | 1.2         | 1.5         | 1.2         | 1.9         | 1.5         | -1.9        | 2.6         |
| M95712        |          | B-raf                                                           | 1654_at                 | 6916        | anti-apoptosis                   | -1.2        | 1.2         | -2.9        | -2.0        | -1.5        | 1.3         | -1.2        |
| AF005775      |          | caspase-like apoptosis regulatory protein                       | 1867_at                 | 6916        | anti-apoptosis                   | 1.2         | 1.4         | 1.7         | 2.6         | 1.6         | 1.0         | 1.7         |
| <b>S81914</b> | <b>A</b> | <b>radiation-inducible immediate-early gene</b>                 | <b>1237_at</b>          | <b>6916</b> | <b>anti-apoptosis</b>            | <b>1.0</b>  | <b>1.2</b>  | <b>3.5</b>  | <b>3.1</b>  | <b>3.7</b>  | <b>4.7</b>  | <b>8.5</b>  |
| AI417038      |          | tg78b04.x1_cDNA                                                 | 40533_at                | 6916        | anti-apoptosis                   | 1.6         | 1.6         | -1.6        | 1.4         | 8.2         | 11.2        | 8.1         |
| <b>X89101</b> |          | <b>Fas (Apo-1, CD95)</b>                                        | <b>1808_s_at</b>        | <b>6917</b> | <b>induction of apoptosis</b>    | <b>1.7</b>  | <b>-1.3</b> | <b>2.0</b>  | <b>1.8</b>  | <b>1.2</b>  | <b>5.7</b>  | <b>-1.1</b> |
| <b>X83490</b> |          | <b>Fas/Apo-1</b>                                                | <b>1440_s_at</b>        | <b>6917</b> | <b>induction of apoptosis</b>    | <b>-1.1</b> | <b>-1.1</b> | <b>3.9</b>  | <b>1.7</b>  | <b>1.4</b>  | <b>1.6</b>  | <b>1.4</b>  |
| X83492        |          | Fas/Apo-1                                                       | 1441_s_at               | 6917        | induction of apoptosis           | -1.9        | -1.5        | -2.2        | 2.5         | 1.0         | 3.1         | 1.8         |
| U19599        |          | (BAX delete)                                                    | 1987_s_at               | 6917        | induction of apoptosis           | 2.9         | 1.6         | 2.7         | 1.2         | -1.7        | -2.9        | -1.1        |
| L22475        |          | Bax gamma                                                       | 2067_f_at               | 6917        | induction of apoptosis           | 1.8         | 1.4         | 8.4         | -1.1        | -1.4        | -4.5        | -1.7        |
| <b>U37518</b> | <b>B</b> | <b>TNF-related apoptosis inducing ligand TRAIL</b>              | <b>1715_at</b>          | <b>6917</b> | <b>induction of apoptosis</b>    | <b>-1.1</b> | <b>-1.5</b> | <b>-1.1</b> | <b>-1.7</b> | <b>-2.5</b> | <b>-5.1</b> | <b>-7.2</b> |
| L22473        |          | Bax alpha                                                       | 2065_s_at               | 6917        | induction of apoptosis           | 2.6         | 1.7         | 2.1         | 1.4         | -1.1        | -4.6        | -1.4        |
| AF079221      |          | BCL2/adenovirus E1B 19kDa-interacting protein 3a                | 39436_at                | 6917        | induction of apoptosis           | 2.1         | 1.1         | -1.8        | 3.0         | 1.0         | 1.0         | -2.4        |
| AF032457      |          | BimEL                                                           | 31611_s_at              | 6917        | induction of apoptosis           | 2.7         | -2.9        | -2.3        | -1.4        | -8.0        | 1.0         | -3.4        |
| X14787        |          | thrombospondin                                                  | 115_at                  | 6928        | cell motility                    | 1.0         | -1.7        | -1.3        | 1.1         | 1.1         | 1.0         | 2.5         |
| X78947        | A        | connective tissue growth factor                                 | 36638_at                | 6928        | cell motility                    | -1.4        | 1.1         | -1.1        | 3.0         | 4.2         | 2.7         | 4.4         |
| X05908        | A        | lipocortin                                                      | 37403_at                | 6928        | cell motility                    | -1.2        | -1.2        | 1.3         | 1.3         | 1.0         | 1.4         | 2.8         |
| Z29083        | A        | 5T4 gene 5T4 Oncofetal antigen                                  | 368_at                  | 6928        | cell motility                    | 1.6         | -1.1        | 1.6         | 1.6         | 1.7         | 1.1         | 2.6         |
| L05624        | A        | MAP kinase kinase , complete cds                                | 1844_s_at               | 6928        | cell motility                    | 1.7         | 1.6         | 1.1         | 2.7         | 2.5         | 2.2         | 3.7         |
| L23808        |          | metalloproteinase (HME)                                         | 1481_at                 | 6928        | cell motility                    | -2.6        | 1.0         | 1.0         | 1.7         | -1.2        | -3.0        | 5.9         |
| L26318        |          | protein kinase (JNK1)                                           | 2070_i_at               | 6928        | cell motility                    | 1.0         | -2.2        | 12.3        | -1.5        | -1.8        | 1.1         | 57.2        |
| AF032862      | A        | intracellular hyaluronin acid binding protein (IHABP)           | 36863_at                | 6928        | cell motility                    | 1.0         | 1.4         | 1.0         | 2.1         | 2.9         | 3.8         | 8.6         |
| U43142        |          | vascular endothelial growth factor related protein              | 159_at                  | 6929        | substrate-bound cell migration   | 2.7         | -2.3        | -2.0        | 1.3         | 1.5         | 1.2         | 3.3         |
| X72308        |          | monocyte chemoattractant protein-3 (MCP-3)                      | 39802_at                | 6935        | chemotaxis                       | -1.8        | -1.2        | -1.8        | -3.6        | -1.2        | -1.9        | 1.0         |
| L06797        | B        | (clone L5) orphan G protein-coupled receptor                    | 645_s_at                | 6935        | chemotaxis                       | 1.5         | 1.2         | -1.4        | -1.8        | -1.2        | -1.4        | -2.6        |
| U38545        |          | ARF-activated phosphatidylinositol-specific phosphatase         | 177_at                  | 6935        | chemotaxis                       | -1.1        | -1.4        | 1.3         | -1.6        | -3.5        | -2.4        | -2.0        |
| L05624        | A        | MAP kinase kinase , complete cds                                | 1844_s_at               | 6935        | chemotaxis                       | 1.7         | 1.6         | 1.1         | 2.7         | 2.5         | 2.2         | 3.7         |
| U94888        |          | CC-chemokine receptor 10 (CCR10)                                | 32484_at                | 6935        | chemotaxis                       | -2.3        | -2.6        | -1.5        | -1.4        | 1.2         | -2.4        | -3.2        |
| U64197        | A        | chemokine exodus-1                                              | 40385_at                | 6935        | chemotaxis                       | 1.3         | 1.1         | 1.4         | 2.1         | -1.4        | 1.6         | 46.4        |
| M57729        |          | complement component C5                                         | 37816_at                | 6935        | chemotaxis                       | 1.3         | 2.4         | -6.0        | -1.5        | -2.5        | -6.8        | 10.7        |
| M36820        | A        | cytokine (GRO-beta)                                             | 37187_at                | 6935        | chemotaxis                       | 1.5         | -1.4        | 1.9         | 1.7         | 1.5         | 1.4         | 3.9         |
| Y16241        | B        | nebullett                                                       | 34873_at                | 6936        | muscle contraction               | -1.3        | 1.1         | -1.4        | 1.1         | -1.5        | -2.1        | -4.5        |
| L19711        | B        | dystroglycan (DAG1)                                             | 36989_at                | 6936        | muscle contraction               | -1.1        | -1.2        | -1.1        | -2.4        | -2.3        | -2.1        | -3.1        |
| U48508        |          | skeletal muscle ryanodine receptor gene (RYR1), promoter region | 37990_at                | 6936        | muscle contraction               | 1.3         | -1.1        | -1.4        | -3.2        | 2.4         | -2.0        | 1.0         |
| AL038340      | B        | DKFZp566K192                                                    | 32243_g_at              | 6936        | muscle contraction               | -1.2        | -1.1        | -1.7        | -1.9        | -2.3        | -3.8        | -4.9        |
| AL038340      | B        | DKFZp566K192_s1                                                 | 32242_at                | 6936        | muscle contraction               | -1.1        | -1.1        | -1.5        | -1.9        | -3.0        | -4.3        | -4.4        |
| M19267        | B        | tropomyosin                                                     | 36790_at                | 6937        | regulation of muscle contraction | 1.2         | -1.2        | -1.4        | 1.0         | -1.6        | -2.6        | -3.0        |
| M19267        | B        | tropomyosin                                                     | 36791_g_at              | 6937        | regulation of muscle contraction | 1.2         | -1.2        | -1.2        | 1.3         | -1.3        | -1.2        | -3.2        |
| Z24727        | B        | tropomyosin isoform                                             | 36792_at                | 6937        | regulation of muscle contraction | 1.1         | 1.1         | 1.5         | -1.2        | -1.3        | -1.6        | -4.6        |
| Y13492        |          | smothelin-B                                                     | 31830_s_at              | 6939        | smooth muscle contraction        | 1.3         | -2.0        | -1.2        | -1.2        | 1.0         | 1.1         | 4.7         |
| K02566        |          | alpha-2-thiol proteinase inhibitor                              | 37234_at                | 6939        | smooth muscle contraction        | 1.2         | 1.4         | 6.9         | 1.8         | 1.1         | -2.8        | -1.9        |
| X13988        |          | embryonic myosin heavy chain                                    | 32729_at                | 6941        | striated muscle contraction      | -1.4        | -1.4        | -5.1        | 8.8         | 1.8         | 2.9         | 1.8         |
| U39412        | B        | alpha SNAP                                                      | 36877_at                | 6944        | membrane fusion                  | 1.2         | 1.0         | 1.0         | -1.7        | -1.7        | -2.7        | -1.6        |
| U74324        |          | guanine nucleotide exchange factor mss4                         | 38264_at                | 6944        | membrane fusion                  | -1.5        | 1.7         | -1.3        | 1.1         | 1.0         | 3.1         | 1.3         |
| Y10032        | B        | putative serine/threonine protein kinase                        | 973_at                  | 6950        | response to stress               | 1.5         | -1.2        | 1.7         | -1.4        | -1.2        | -2.3        | -3.0        |
| AB011123      | B        | KIAA0551                                                        | 32680_at                | 6950        | response to stress               | -1.4        | 1.4         | -1.4        | -1.2        | -1.4        | -1.6        | -3.5        |
| AB014587      | A        | KIAA0687                                                        | 35694_at                | 6950        | response to stress               | 1.1         | 1.0         | -1.6        | 1.3         | 1.7         | 1.2         | 2.8         |
| AB007455      | B        | P53TG1-A                                                        | 33749_at                | 6950        | response to stress               | 1.0         | 1.0         | 1.1         | -2.2        | -2.3        | -2.7        | -3.4        |
| AF010193      |          | MAD-related gene SMAD7 (SMAD7)                                  | 1857_at                 | 6950        | response to stress               | 1.2         | -2.0        | 1.2         | 1.1         | -1.1        | -1.1        | 3.7         |
| U43784        |          | mitogen activated protein kinase activated protein              | 1991_s_at               | 6950        | response to stress               | -1.1        | 1.3         | -1.3        | -2.5        | -1.3        | -1.4        | -1.2        |
| L26318        |          | protein kinase (JNK1)                                           | 2070_i_at               | 6950        | response to stress               | 1.0         | -2.2        | 12.3        | -1.5        | -1.8        | 1.1         | 57.2        |
| AF024710      | A        | vascular endothelial growth factor (VEGF)                       | 1953_at                 | 6950        | response to stress               | 1.4         | -1.3        | 1.0         | 1.8         | 1.4         | 1.1         | 5.8         |
| L19872        |          | AH-receptor                                                     | 40516_at                | 6950        | response to stress               | 1.4         | -1.8        | -1.2        | 1.9         | 1.3         | 1.4         | 3.2         |
| M57729        |          | complement component C5                                         | 37816_at                | 6950        | response to stress               | 1.3         | 2.4         | -6.0        | -1.5        | -2.5        | -6.8        | 10.7        |
| AF025887      | B        | glutathione S-transferase A4-4 (GSTA4)                          | 40508_at                | 6950        | response to stress               | -1.1        | -1.2        | -1.5        | -1.3        | -2.2        | -3.4        | -4.2        |
| U65416        |          | MHC class I molecule (MICB) gene                                | 35937_at                | 6950        | response to stress               | 1.2         | 1.6         | -3.4        | 1.1         | 3.2         | 3.5         | 1.1         |
| U67156        | A        | mitogen-activated kinase kinase kinase 5 (MAPKKK5)              | 1327_s_at               | 6950        | response to stress               | -1.8        | 1.8         | -1.2        | 2.9         | 2.3         | 2.1         | 1.6         |
| AF099999      | A        | Sie-20 related kinase SPAK                                      | 40866_at                | 6950        | response to stress               | -1.1        | -1.1        | -1.6        | 1.1         | 1.4         | 1.5         | 2.6         |
| AF022375      | A        | vascular endothelial growth factor                              | 36100_at                | 6950        | response to stress               | 1.0         | -1.1        | 1.4         | 1.8         | 1.4         | 1.9         | 4.9         |
| M63978        | A        | vascular endothelial growth factor gene                         | 36101_s_at              | 6950        | response to stress               | 2.5         | -1.9        | 2.8         | 2.0         | 2.2         | 1.2         | 18.5        |
| X89214        | A        | haptoglobin related protein                                     | 36984_f_at              | 6952        | defense response                 | -1.5        | -1.1        | 1.4         | -1.1        | 1.4         | 2.6         | 2.0         |
| X58072        | B        | hGATA3 trans-acting T-cell specific transcription factor        | 40511_at                | 6952        | defense response                 | 1.0         | -1.4        | -2.2        | -1.5        | -2.4        | -4.5        | -4.4        |

| GenBank       | Group    | Affymetric Gene Annotation                                   | Affymatrix Probe set id | GO id       | GO Biological Process                                             | 0           | 4           | 6           | 8           | 12          | 16          | 24          |
|---------------|----------|--------------------------------------------------------------|-------------------------|-------------|-------------------------------------------------------------------|-------------|-------------|-------------|-------------|-------------|-------------|-------------|
| AF022797      |          | intermediate conductance calcium-activated potassium channel | 41106_at                | 6952        | defense response                                                  | 1.0         | -1.1        | 3.2         | 1.1         | 1.1         | 1.4         | 2.6         |
| M68516        | B        | protein C inhibitor gene                                     | 37008_r_at              | 6953        | acute-phase response                                              | 1.0         | -1.1        | -2.8        | -1.5        | -3.3        | -5.4        | -29.3       |
| Z34897        | A        | H1 histamine receptor                                        | 35384_at                | 6954        | inflammatory response                                             | -1.6        | -1.8        | 3.6         | 1.0         | 4.6         | 1.8         | 2.8         |
| X52015        | A        | interleukin-1 receptor antagonist                            | 37603_at                | 6954        | inflammatory response                                             | -1.4        | 1.2         | -1.8        | 1.0         | 1.6         | 1.5         | 3.0         |
| X05908        | A        | lipocortin                                                   | 37403_at                | 6954        | inflammatory response                                             | -1.2        | -1.2        | 1.3         | 1.3         | 1.0         | 1.4         | 2.8         |
| X72308        |          | monocyte chemoattractant protein-3 (MCP-3)                   | 39802_at                | 6954        | inflammatory response                                             | -1.8        | -1.2        | -1.8        | -3.6        | -1.2        | -1.9        | 1.0         |
| L06797        | B        | (clone L5) orphan G protein-coupled receptor                 | 649_s_at                | 6954        | inflammatory response                                             | 1.5         | 1.2         | -1.4        | -1.8        | -1.2        | -1.4        | -2.6        |
| <b>V01512</b> | <b>A</b> | <b>cellular oncogene c-fos</b>                               | <b>1916_s_at</b>        | <b>6954</b> | <b>inflammatory response</b>                                      | <b>-1.3</b> | <b>1.8</b>  | <b>2.9</b>  | <b>4.7</b>  | <b>7.1</b>  | <b>6.4</b>  | <b>5.1</b>  |
| K02585        |          | alpha-2-thiol proteinase inhibitor                           | 37234_at                | 6954        | inflammatory response                                             | 1.2         | 1.4         | 6.9         | 1.8         | 1.1         | -2.8        | -1.9        |
| AF068180      | B        | B cell linker protein BLNK, alternatively spliced,           | 36242_at                | 6954        | inflammatory response                                             | -1.2        | 2.3         | 1.3         | -1.1        | -2.5        | -2.2        | -5.9        |
| <b>V01512</b> | <b>A</b> | <b>cellular oncogene c-fos</b>                               | <b>1915_s_at</b>        | <b>6954</b> | <b>inflammatory response</b>                                      | <b>1.1</b>  | <b>1.6</b>  | <b>1.9</b>  | <b>2.5</b>  | <b>3.0</b>  | <b>2.2</b>  | <b>3.5</b>  |
| U64197        | A        | chemokine exodus-1                                           | 40385_at                | 6954        | inflammatory response                                             | 1.3         | 1.1         | 1.4         | 2.1         | -1.4        | 1.6         | 46.4        |
| M57729        |          | complement component C5                                      | 37816_at                | 6954        | inflammatory response                                             | 1.3         | 2.4         | -6.0        | -1.5        | -2.5        | -6.8        | 10.7        |
| M36820        | A        | cytokine (GRO-beta)                                          | 37187_at                | 6954        | inflammatory response                                             | 1.5         | -1.4        | 1.9         | 1.7         | 1.5         | 1.4         | 3.9         |
| M27492        | B        | interleukin 1 receptor                                       | 1368_at                 | 6954        | inflammatory response                                             | -1.1        | 1.8         | -1.2        | 1.4         | -1.9        | -3.1        | -8.3        |
| X80878        |          | R kappa B                                                    | 39137_at                | 6954        | inflammatory response                                             | 2.2         | 1.1         | 1.1         | -3.7        | 1.0         | 2.5         | 2.7         |
| AF051152      | A        | Toll/interleukin-1 receptor-like protein 4 (TIL4)            | 40310_at                | 6954        | inflammatory response                                             | -1.3        | 1.0         | 1.0         | 3.2         | 2.1         | 3.0         | 2.5         |
| AF017060      | A        | aldehyde oxidase (OAX-1)                                     | 37599_at                | 6954        | inflammatory response                                             | -1.6        | -1.1        | -1.2        | 1.1         | 1.0         | 2.9         | 2.3         |
| <b>X89101</b> |          | <b>Fas (Apo-1, CD95)</b>                                     | <b>1808_s_at</b>        | <b>6955</b> | <b>immune response</b>                                            | <b>1.7</b>  | <b>-1.3</b> | <b>2.0</b>  | <b>1.8</b>  | <b>1.2</b>  | <b>5.7</b>  | <b>-1.1</b> |
| <b>X83490</b> |          | <b>Fas/Apo-1</b>                                             | <b>1440_s_at</b>        | <b>6955</b> | <b>immune response</b>                                            | <b>-1.1</b> | <b>-1.1</b> | <b>3.9</b>  | <b>1.7</b>  | <b>1.4</b>  | <b>1.6</b>  | <b>1.4</b>  |
| X12830        |          | interleukin-6 (IL-6) receptor                                | 160032_at               | 6955        | immune response                                                   | -1.2        | -1.5        | -2.6        | -1.2        | 1.0         | -1.2        | 1.2         |
| X16354        | A        | transmembrane carcinoembryonic antigen                       | 988_at                  | 6955        | immune response                                                   | -9.5        | 1.1         | 3.3         | 1.1         | 2.6         | 8.6         | 4.6         |
| AJ225089      |          | 2-5 oligoadenylate synthetase 59 kDa                         | 34491_at                | 6955        | immune response                                                   | 2.2         | 1.8         | 1.1         | -2.6        | -2.9        | -2.9        | 1.8         |
| X63492        |          | Fas/Apo-1                                                    | 1441_s_at               | 6955        | immune response                                                   | -1.9        | -1.5        | -2.2        | 2.5         | 1.0         | 3.1         | 1.8         |
| X72308        |          | monocyte chemoattractant protein-3 (MCP-3)                   | 39802_at                | 6955        | immune response                                                   | -1.8        | -1.2        | -1.8        | -3.6        | -1.2        | -1.9        | 1.0         |
| L06797        | B        | (clone L5) orphan G protein-coupled receptor                 | 649_s_at                | 6955        | immune response                                                   | 1.5         | 1.2         | -1.4        | -1.8        | -1.2        | -1.4        | -2.6        |
| X03909        | B        | gamma-interferon-inducible protein (IP-30)                   | 39728_at                | 6955        | immune response                                                   | 1.3         | 1.1         | -1.2        | -1.5        | -1.4        | -1.2        | -3.3        |
| X52425        | A        | IL-4-R, the interleukin 4 receptor                           | 404_at                  | 6955        | immune response                                                   | 1.3         | -1.2        | 2.3         | 1.8         | 2.4         | 1.8         | 2.9         |
| U19247        | B        | interferon-gamma receptor alpha chain                        | 1038_s_at               | 6955        | immune response                                                   | -1.2        | 1.0         | -1.2        | 1.5         | -1.4        | -2.2        | -4.0        |
| M13755        | B        | interferon-induced 17-kDa/15-kDa protein                     | 1107_s_at               | 6955        | immune response                                                   | 1.5         | 1.2         | 1.0         | -1.8        | -1.9        | -2.9        | -1.4        |
| M24594        |          | interferon-inducible 56 Kd protein                           | 915_at                  | 6955        | immune response                                                   | 2.0         | -1.1        | -1.3        | -2.3        | -3.3        | -2.8        | 1.9         |
| L40387        |          | thyroid receptor interactor (TRIP14)                         | 269_at                  | 6955        | immune response                                                   | 2.8         | 1.4         | 1.4         | -2.1        | -2.3        | -4.4        | 1.4         |
| <b>U37518</b> | <b>B</b> | <b>TNF-related apoptosis inducing ligand TRAIL</b>           | <b>1715_at</b>          | <b>6955</b> | <b>immune response</b>                                            | <b>-1.1</b> | <b>-1.5</b> | <b>-1.1</b> | <b>-1.7</b> | <b>-2.5</b> | <b>-5.1</b> | <b>-7.2</b> |
| U94888        |          | CC-chemokine receptor 10 (CCR10)                             | 32484_at                | 6955        | immune response                                                   | -2.3        | -2.6        | -1.5        | -1.4        | 1.2         | -2.4        | -3.2        |
| U64197        | A        | chemokine exodus-1                                           | 40385_at                | 6955        | immune response                                                   | 1.3         | 1.1         | 1.4         | 2.1         | -1.4        | 1.6         | 46.4        |
| AF026939      |          | CIG49 (cig49)                                                | 38584_at                | 6955        | immune response                                                   | 1.3         | 1.4         | -1.9        | -1.3        | -3.1        | -1.6        | 1.6         |
| M36820        | A        | cytokine (GRO-beta)                                          | 37187_at                | 6955        | immune response                                                   | 1.5         | -1.4        | 1.9         | 1.7         | 1.5         | 1.4         | 3.9         |
| Z93930        | A        | DNA sequence from clone 292E10 on chromosome 22q11-12        | 39755_at                | 6955        | immune response                                                   | -1.1        | -1.2        | 1.1         | 1.6         | 1.1         | 2.0         | 4.3         |
| Z93930        | A        | DNA sequence from clone 292E10 on chromosome 22q11-12        | 39756_g_at              | 6955        | immune response                                                   | -1.1        | -1.1        | 1.4         | 1.3         | 1.4         | 1.6         | 2.7         |
| AF001862      | B        | FYB binding protein                                          | 41819_at                | 6955        | immune response                                                   | -1.9        | 1.2         | -3.3        | -1.2        | -1.8        | -3.1        | -20.9       |
| U60319        |          | haemochromatosis protein (HLA-H)                             | 38913_at                | 6955        | immune response                                                   | 3.5         | 1.2         | 1.3         | 1.1         | -2.5        | -1.2        | -1.1        |
| U15085        |          | HLA-DMS                                                      | 41609_at                | 6955        | immune response                                                   | -1.4        | 1.2         | 1.7         | 1.8         | 1.0         | -2.5        | -3.2        |
| M31932        |          | IgG low affinity Fc fragment receptor (FcRIIa)               | 37609_l_at              | 6955        | immune response                                                   | 1.5         | -1.4        | 1.5         | 1.2         | -3.1        | -2.7        | -3.3        |
| M34455        |          | interferon-gamma-inducible indoleamine 2,3-dioxygenase (IDO) | 36804_at                | 6955        | immune response                                                   | -1.5        | 1.0         | 1.1         | 1.5         | 1.5         | -1.5        | 2.5         |
| M24594        |          | interferon-inducible 56 Kd protein                           | 32814_at                | 6955        | immune response                                                   | 2.0         | -1.2        | -1.9        | -3.0        | -8.0        | -2.1        | 2.7         |
| M27492        | B        | interleukin 1 receptor                                       | 1368_at                 | 6955        | immune response                                                   | -1.1        | 1.8         | -1.2        | 1.4         | -1.9        | -3.1        | -8.3        |
| AF031167      |          | interleukin 15 precursor (IL-15)                             | 38488_s_at              | 6955        | immune response                                                   | -2.9        | -1.6        | -1.5        | -3.8        | -5.8        | -7.0        | 1.3         |
| M14660        |          | ISG-54K gene (interferon stimulated gene)                    | 908_at                  | 6955        | immune response                                                   | -1.2        | 1.4         | 1.8         | -1.5        | -4.4        | 1.5         | 2.1         |
| M14660        |          | ISG-54K gene (interferon stimulated gene)                    | 909_g_at                | 6955        | immune response                                                   | -1.2        | 1.4         | 1.8         | -1.5        | -4.4        | 1.5         | 2.1         |
| U65416        |          | MHC class I molecule (MICB) gene                             | 35937_at                | 6955        | immune response                                                   | 1.2         | 1.6         | -3.4        | 1.1         | 3.2         | 3.5         | 1.1         |
| J02931        | A        | placental tissue factor (two ms)                             | 36543_at                | 6955        | immune response                                                   | 1.0         | -1.1        | 2.4         | 5.7         | 8.2         | 11.3        | 8.2         |
| AF051152      | A        | Toll/interleukin-1 receptor-like protein 4 (TIL4)            | 40310_at                | 6955        | immune response                                                   | -1.3        | 1.0         | 1.0         | 3.2         | 2.1         | 3.0         | 2.5         |
| M57729        |          | complement component C5                                      | 37816_at                | 6957        | complement activation, alternative pathway                        | 1.3         | 2.4         | -6.0        | -1.5        | -2.5        | -6.8        | 10.7        |
| M57729        |          | complement component C5                                      | 37816_at                | 6958        | complement activation, classical pathway                          | 1.3         | 2.4         | -6.0        | -1.5        | -2.5        | -6.8        | 10.7        |
| M25915        | B        | complement cytolysis inhibitor (CLI)                         | 36780_at                | 6958        | complement activation, classical pathway                          | 1.0         | -1.1        | 1.0         | -1.8        | -1.7        | -2.1        | -2.7        |
| Z50194        | A        | PQ-rich protein                                              | 36239_at                | 6959        | humoral immune response                                           | 1.2         | 1.0         | 11.2        | 12.9        | 3.8         | 9.4         | 42.4        |
| AF068180      | B        | B cell linker protein BLNK, alternatively spliced,           | 36242_at                | 6959        | humoral immune response                                           | -1.2        | 2.3         | 1.3         | -1.1        | -2.5        | -2.2        | -5.9        |
| X03663        |          | c-fms proto-oncogene                                         | 160022_at               | 6960        | antimicrobial humoral response (sensu Invertebrata)               | -1.5        | -2.1        | -1.3        | -1.5        | -2.0        | -10.7       | -1.2        |
| X72308        |          | monocyte chemoattractant protein-3 (MCP-3)                   | 39802_at                | 6960        | antimicrobial humoral response (sensu Invertebrata)               | -1.8        | -1.2        | -1.8        | -3.6        | -1.2        | -1.9        | 1.0         |
| <b>U39817</b> | <b>A</b> | <b>Bloomer's syndrome protein (BLM)</b>                      | <b>1544_at</b>          | <b>6960</b> | <b>antimicrobial humoral response (sensu Invertebrata)</b>        | <b>-3.3</b> | <b>-1.4</b> | <b>1.8</b>  | <b>-2.6</b> | <b>13.2</b> | <b>11.8</b> | <b>4.7</b>  |
| U64197        | A        | chemokine exodus-1                                           | 40385_at                | 6960        | antimicrobial humoral response (sensu Invertebrata)               | 1.3         | 1.1         | 1.4         | 2.1         | -1.4        | 1.6         | 46.4        |
| U77604        | B        | microsomal glutathione S-transferase 2                       | 820_at                  | 6960        | antimicrobial humoral response (sensu Invertebrata)               | -1.2        | 1.4         | -1.6        | -1.1        | -1.1        | -1.3        | -2.5        |
| AF026977      |          | microsomal glutathione S-transferase 3 (MGST3)               | 39018_at                | 6960        | antimicrobial humoral response (sensu Invertebrata)               | 1.3         | 1.4         | 2.6         | 1.1         | 1.0         | -1.2        | -1.7        |
| X68487        | A        | A2b adenosine receptor                                       | 36324_at                | 6968        | cellular defense response                                         | 1.7         | -1.2        | 1.4         | 2.8         | 1.9         | 1.9         | 2.0         |
| U19142        |          | GAGE-1 protein                                               | 31497_at                | 6968        | cellular defense response                                         | 1.0         | 1.5         | -3.0        | 1.3         | 1.0         | -2.2        | 1.6         |
| L13210        | B        | Mac-2 binding protein                                        | 37754_at                | 6968        | cellular defense response                                         | 1.2         | -1.3        | -1.4        | -2.3        | -1.9        | -1.9        | -2.9        |
| U65416        |          | MHC class I molecule (MICB) gene                             | 35937_at                | 6968        | cellular defense response                                         | 1.2         | 1.6         | -3.4        | 1.1         | 3.2         | 3.5         | 1.1         |
| M32011        |          | neutrophil oxidase factor (p67-phox)                         | 41038_at                | 6968        | cellular defense response                                         | -2.4        | 1.8         | -8.1        | 1.6         | 2.1         | 2.2         | 1.9         |
| <b>L78833</b> | <b>A</b> | <b>BRCA1, Rho7 and vatl genes</b>                            | <b>604_at</b>           | <b>6974</b> | <b>response to DNA damage stimulus</b>                            | <b>-1.3</b> | <b>-3.1</b> | <b>-1.2</b> | <b>2.0</b>  | <b>23.1</b> | <b>4.7</b>  | <b>6.6</b>  |
| <b>U64805</b> | <b>A</b> | <b>Brcal-delta11b (Brcal1)</b>                               | <b>33724_at</b>         | <b>6974</b> | <b>response to DNA damage stimulus</b>                            | <b>1.4</b>  | <b>-1.3</b> | <b>1.5</b>  | <b>1.4</b>  | <b>2.0</b>  | <b>2.0</b>  | <b>2.5</b>  |
| AF016582      |          | checkpoint kinase Chk1 (CHK1)                                | 38920_at                | 6974        | response to DNA damage stimulus                                   | -1.3        | -1.4        | 6.2         | 22.1        | 1.2         | 2.0         | 11.9        |
| AL022325      | A        | DNA sequence from Fosmid 27C3 on chromosome 22q11.2-q12      | 39374_at                | 6977        | DNA damage response, signal transduction by p53 class mediator re | -2.3        | 1.0         | -4.3        | 1.4         | 6.6         | 1.9         | 13.1        |
| X99325        |          | Ste20-like kinase                                            | 399_at                  | 6979        | response to oxidative stress                                      | 1.3         | -6.0        | 2.5         | -1.6        | 1.0         | -1.4        | 1.3         |
| X53463        | B        | glutathione peroxidase-like protein                          | 35194_at                | 6979        | response to oxidative stress                                      | 1.0         | 1.3         | 1.2         | -2.5        | -2.6        | -2.3        | -5.0        |
| AB002348      | B        | KIAA0350                                                     | 34681_at                | 6979        | response to oxidative stress                                      | 1.3         | -1.4        | -1.5        | -2.6        | -1.4        | -2.7        | -1.7        |
| Z11793        | B        | selenoprotein P                                              | 34363_at                | 6979        | response to oxidative stress                                      | -2.1        | -1.1        | -1.7        | 1.6         | -1.5        | -3.5        | -9.1        |
| U74612        | A        | hepatocyte nuclear factor-3/k head homolog 11A (HFH-11A)     | 34715_at                | 6979        | response to oxidative stress                                      | 1.8         | -1.1        | 1.4         | 1.1         | 2.3         | 2.4         | 4.2         |
| D00632        | B        | glutathione peroxidase                                       | 770_at                  | 6982        | response to lipid hydroperoxide                                   | 1.4         | -1.1        | -1.4        | -1.9        | -2.0        | -3.2        | -2.2        |
| AF055001      |          | clone 24560 unknown                                          | 39733_at                | 6986        | response to unfolded protein                                      | 1.2         | 1.1         | -1.4        | -1.2        | -1.4        | 1.4         | 2.9         |

| GenBank         | Accession # | Group | Affymetric Gene Annotation                               | Probe set id      | GO id       | GO Biological Process                                  | 0           | 4           | 6           | 8           | 12          | 16          | 24          |
|-----------------|-------------|-------|----------------------------------------------------------|-------------------|-------------|--------------------------------------------------------|-------------|-------------|-------------|-------------|-------------|-------------|-------------|
| D64142          |             |       | histone H1x                                              | 318_at            | 7001        | chromosome organization and biogenesis (sensu Eukarya) | 2.1         | -1.3        | -1.3        | -5.6        | -1.6        | -2.0        | 6.4         |
| D64142          |             |       | histone H1x                                              | 319_g_at          | 7001        | chromosome organization and biogenesis (sensu Eukarya) | 1.1         | -1.1        | -1.8        | -2.4        | -1.6        | -1.2        | 3.6         |
| AJ223352        | B           |       | histone H2B, clone pG4-5-14                              | 32819_at          | 7001        | chromosome organization and biogenesis (sensu Eukarya) | -1.3        | 1.2         | -1.3        | -1.2        | -1.3        | -2.8        | -1.6        |
| AB019987        | A           |       | chromosome-associated polypeptide-C                      | 34878_at          | 7001        | chromosome organization and biogenesis (sensu Eukarya) | 1.2         | 1.0         | -1.1        | 1.7         | 2.3         | 4.2         | 5.7         |
| AJ223353        | B           |       | histone H2B, clone pG4-5-15                              | 38576_at          | 7001        | chromosome organization and biogenesis (sensu Eukarya) | -1.9        | 1.3         | -1.4        | 1.0         | -1.2        | -1.7        | -2.8        |
| X07948          |             |       | transition protein 1 (TP1)                               | 39639_s_at        | 7001        | chromosome organization and biogenesis (sensu Eukarya) | -4.7        | 1.1         | 10.2        | -1.3        | -1.3        | -3.1        | -1.1        |
| U14518          | A           |       | centromere protein-A (CENP-A)                            | 527_at            | 7001        | chromosome organization and biogenesis (sensu Eukarya) | 1.2         | 1.0         | -1.2        | 1.9         | 3.4         | 4.4         | 10.9        |
| X03473          | A           |       | gene histone H1(O)                                       | 434_at            | 7001        | chromosome organization and biogenesis (sensu Eukarya) | 1.4         | -1.5        | 2.2         | -1.7        | 1.7         | 3.8         | 2.9         |
| X57930          | B           |       | histones H2B, 1 and H2A                                  | 33352_at          | 7001        | chromosome organization and biogenesis (sensu Eukarya) | -1.9        | -1.1        | -2.2        | -2.1        | -2.6        | -4.0        | -2.5        |
| AF006513        | A           |       | Chk1                                                     | 39231_at          | 7001        | chromosome organization and biogenesis (sensu Eukarya) | -1.2        | 1.2         | 1.1         | 3.2         | 2.0         | 2.7         | 2.2         |
| AF092563        | A           |       | chromosome-associated protein-E (hCAP-E)                 | 37502_at          | 7001        | chromosome organization and biogenesis (sensu Eukarya) | -2.0        | 1.0         | 1.4         | 5.5         | 1.5         | 5.1         | 3.4         |
| X14850          |             |       | H2A.X encoding histone H2A.X                             | 40195_at          | 7001        | chromosome organization and biogenesis (sensu Eukarya) | 4.1         | -1.5        | -1.3        | 1.2         | 1.0         | 1.0         | 3.0         |
| Z80780          | B           |       | H2B/h gene                                               | 31523_f_at        | 7001        | chromosome organization and biogenesis (sensu Eukarya) | 1.1         | 1.5         | 1.6         | -1.2        | -1.4        | -1.5        | -2.6        |
| M37583          | A           |       | histone (H2A.Z)                                          | 39337_at          | 7001        | chromosome organization and biogenesis (sensu Eukarya) | 1.4         | 1.3         | -2.6        | 1.3         | 1.8         | 2.6         | 2.6         |
| U72936          |             |       | putative DNA dependent ATPase and helicase (ATR)         | 39146_at          | 7001        | chromosome organization and biogenesis (sensu Eukarya) | 1.2         | 7.7         | 1.2         | 1.9         | 4.2         | 1.9         | -1.7        |
| AL009179        | B           |       | dJ97D16.4 (Histone H2B)                                  | 35576_f_at        | 7001        | chromosome organization and biogenesis (sensu Eukarya) | -1.2        | 1.0         | 1.5         | -1.4        | -1.1        | -1.3        | -2.6        |
| AL009179        |             |       | dJ97D16.6 (Histone H3.1)                                 | 36757_at          | 7001        | chromosome organization and biogenesis (sensu Eukarya) | -1.4        | 2.2         | -1.4        | 1.1         | -2.5        | -2.6        | -2.7        |
| N35832          |             |       | yx89b10.r1 cDNA                                          | 34964_at          | 7001        | chromosome organization and biogenesis (sensu Eukarya) | 5.3         | -1.1        | -2.2        | -3.9        | -5.4        | -5.7        | 1.8         |
| U59151          | A           |       | Cbf5p homolog (CBF5)                                     | 34829_at          | 7004        | telomerase-dependent telomere maintenance              | 1.1         | 1.0         | 1.3         | 2.5         | 2.7         | 1.7         | 1.5         |
| AF003001        |             |       | TTAGGG repeat binding factor 1 (hTRF1-AS)                | 32257_f_at        | 7004        | telomerase-dependent telomere maintenance              | 7.0         | 9.2         | 1.2         | 1.5         | 1.2         | -2.9        | 2.9         |
| <b>X07695</b>   | <b>B</b>    |       | <b>cytokeratin 4 C-terminal region</b>                   | <b>39657_at</b>   | <b>7010</b> | <b>cytoskeleton organization and biogenesis</b>        | <b>-2.0</b> | <b>1.1</b>  | <b>-1.3</b> | <b>-1.2</b> | <b>-1.6</b> | <b>-3.0</b> | <b>-7.1</b> |
| AB026190        |             |       | Kelch motif containing protein                           | 37150_at          | 7010        | cytoskeleton organization and biogenesis               | -1.4        | 1.4         | -3.6        | 1.2         | 1.5         | 1.5         | -1.2        |
| U13616          | B           |       | ankyrin G (ANK-3)                                        | 36965_at          | 7016        | cytoskeletal anchoring                                 | -1.4        | 1.2         | -1.1        | -1.1        | -1.8        | -1.8        | -2.8        |
| AL022325        |             |       | DNA sequence from Fosmid 27C3 on chromosome 22q11.2-qter | 39374_at          | 7017        | microtubule-based process                              | -2.3        | 1.0         | -4.3        | 1.4         | 6.6         | 1.9         | 13.1        |
| AF064606        |             |       | KB07 protein                                             | 36437_s_at        | 7020        | microtubule nucleation                                 | 1.7         | 1.4         | 1.2         | 2.5         | 1.2         | -1.2        | 2.7         |
| W28255          |             |       | 44b8 cDNA                                                | 40894_at          | 7020        | microtubule nucleation                                 | 29.3        | 1.1         | 1.9         | 1.4         | -1.2        | -4.0        | -2.6        |
| AJ007590        |             |       | XRP2 protein                                             | 39964_at          | 7025        | beta tubulin folding                                   | 1.2         | 1.9         | -1.1        | 2.8         | 1.7         | 1.0         | 1.3         |
| AF026086        |             |       | peroxisome biogenesis disorder protein 1 (PEX1)          | 38366_g_at        | 7031        | peroxisome organization and biogenesis                 | -1.3        | 1.3         | -1.1        | 2.5         | 1.2         | 1.1         | -1.6        |
| AF026086        |             |       | peroxisome biogenesis disorder protein 1 (PEX1), c       | 38365_at          | 7031        | peroxisome organization and biogenesis                 | -1.1        | -1.2        | 1.9         | -1.2        | -2.9        | -2.4        | 1.1         |
| <b>S66213</b>   | <b>A</b>    |       | <b>integrin alpha 6B</b>                                 | <b>33410_at</b>   | <b>7044</b> | <b>cell-substrate junction assembly</b>                | <b>1.3</b>  | <b>-1.1</b> | <b>1.7</b>  | <b>1.9</b>  | <b>1.8</b>  | <b>2.5</b>  | <b>3.7</b>  |
| <b>S66213</b>   | <b>A</b>    |       | <b>integrin alpha 6B</b>                                 | <b>33411_g_at</b> | <b>7044</b> | <b>cell-substrate junction assembly</b>                | <b>1.6</b>  | <b>-1.1</b> | <b>-1.5</b> | <b>2.5</b>  | <b>2.2</b>  | <b>2.4</b>  | <b>3.1</b>  |
| U72514          | A           |       | Czf                                                      | 39357_at          | 7046        | ribosome biogenesis                                    | 1.1         | -1.2        | 1.1         | 1.0         | 1.4         | 1.4         | 2.5         |
| D21337          |             |       | collagen                                                 | 39939_at          | 7048        | oncogenesis                                            | -1.2        | -2.0        | -7.7        | -1.1        | 1.1         | -1.9        | -1.3        |
| AJ007042        | A           |       | TRX5 protein                                             | 38988_at          | 7048        | oncogenesis                                            | 1.0         | 1.2         | -1.5        | 1.5         | 2.0         | 3.6         | 4.2         |
| U19599          |             |       | (BAX delta)                                              | 1997_s_at         | 7048        | oncogenesis                                            | 2.9         | 1.6         | 2.7         | 1.2         | -1.7        | -2.9        | -1.1        |
| L22475          |             |       | Bax gamma                                                | 2067_f_at         | 7048        | oncogenesis                                            | 1.8         | 1.4         | 8.4         | -1.1        | -1.4        | -4.5        | -1.7        |
| <b>X66867</b>   |             |       | <b>max gene</b>                                          | <b>422_s_at</b>   | <b>7048</b> | <b>oncogenesis</b>                                     | <b>1.1</b>  | <b>1.0</b>  | <b>2.9</b>  | <b>1.5</b>  | <b>-1.2</b> | <b>1.0</b>  | <b>-1.1</b> |
| <b>U03106</b>   |             |       | <b>wild-type p53 activated fragment-1 (WAF1)</b>         | <b>2031_s_at</b>  | <b>7048</b> | <b>oncogenesis</b>                                     | <b>1.0</b>  | <b>-1.2</b> | <b>-1.4</b> | <b>-2.8</b> | <b>-2.1</b> | <b>-1.5</b> | <b>-1.2</b> |
| U75285          | A           |       | apoptosis inhibitor survivin gene                        | 40532_at          | 7048        | oncogenesis                                            | 2.4         | 1.9         | 2.4         | 1.2         | 2.1         | 1.5         | 4.7         |
| L22473          |             |       | Bax alpha                                                | 2065_s_at         | 7048        | oncogenesis                                            | 2.6         | 1.7         | 2.1         | 1.4         | -1.1        | -4.6        | -1.4        |
| U58516          |             |       | breast epithelial antigen BA46                           | 34403_at          | 7048        | oncogenesis                                            | 1.8         | 1.0         | 2.6         | -1.1        | -1.1        | 1.2         | -1.6        |
| M68520          | A           |       | cdc2-related protein kinase                              | 1792_g_at         | 7048        | oncogenesis                                            | -1.9        | 1.3         | 1.5         | 1.5         | 2.1         | 2.6         | 1.4         |
| <b>X60287</b>   |             |       | <b>max</b>                                               | <b>1981_s_at</b>  | <b>7048</b> | <b>oncogenesis</b>                                     | <b>1.8</b>  | <b>1.0</b>  | <b>3.1</b>  | <b>1.4</b>  | <b>1.5</b>  | <b>-1.8</b> | <b>1.1</b>  |
| M64347          | B           |       | novel growth factor receptor                             | 31805_at          | 7048        | oncogenesis                                            | 1.1         | 1.0         | -1.2        | -1.6        | -2.0        | -1.5        | -3.2        |
| <b>AF011468</b> | <b>A</b>    |       | <b>serine/threonine kinase (BTAk)</b>                    | <b>34851_at</b>   | <b>7048</b> | <b>oncogenesis</b>                                     | <b>1.0</b>  | <b>1.4</b>  | <b>1.1</b>  | <b>1.0</b>  | <b>1.6</b>  | <b>2.7</b>  | <b>4.9</b>  |
| <b>AF011468</b> | <b>A</b>    |       | <b>serine/threonine kinase (BTAk)</b>                    | <b>34852_g_at</b> | <b>7048</b> | <b>oncogenesis</b>                                     | <b>1.1</b>  | <b>1.0</b>  | <b>1.4</b>  | <b>1.2</b>  | <b>1.3</b>  | <b>2.4</b>  | <b>3.9</b>  |
| AI417038        |             |       | Ig78b04.x1 cDNA                                          | 40533_at          | 7048        | oncogenesis                                            | 1.6         | 1.6         | -1.6        | 1.4         | 8.2         | 11.2        | 8.1         |
| AB019987        | A           |       | chromosome-associated polypeptide-C                      | 34878_at          | 7049        | cell cycle                                             | 1.2         | 1.0         | -1.1        | 1.7         | 2.3         | 4.2         | 5.7         |
| D38073          | A           |       | hRif beta subunit (p102 protein)                         | 33252_at          | 7049        | cell cycle                                             | 1.8         | 1.0         | 1.8         | 1.1         | 3.3         | 3.7         | 4.3         |
| D84557          | A           |       | HsMcm6                                                   | 40117_at          | 7049        | cell cycle                                             | 1.1         | -1.1        | 1.1         | 1.5         | 2.4         | 3.2         | 3.2         |
| D21063          | A           |       | KIAA0030                                                 | 35312_at          | 7049        | cell cycle                                             | 1.1         | -1.5        | -1.1        | -1.3        | 2.2         | 1.8         | 3.1         |
| D38553          | A           |       | KIAA0074                                                 | 41639_at          | 7049        | cell cycle                                             | -1.1        | -1.2        | -1.3        | 2.1         | 9.5         | 2.0         | 11.2        |
| D63880          |             |       | KIAA0159                                                 | 35314_at          | 7049        | cell cycle                                             | 1.2         | 1.0         | 1.5         | -1.2        | -1.2        | 1.8         | 3.4         |
| D79988          |             |       | KIAA0166                                                 | 37469_at          | 7049        | cell cycle                                             | 3.9         | 1.5         | -1.2        | 1.0         | 2.4         | 1.3         | 3.5         |
| <b>AJ000186</b> |             |       | <b>MAD2 protein</b>                                      | <b>37282_at</b>   | <b>7049</b> | <b>cell cycle</b>                                      | <b>-1.4</b> | <b>1.3</b>  | <b>-4.1</b> | <b>2.8</b>  | <b>14.4</b> | <b>13.9</b> | <b>3.8</b>  |
| <b>U65410</b>   | <b>A</b>    |       | <b>Mad2 (hsMAD2), complete cds</b>                       | <b>1720_at</b>    | <b>7049</b> | <b>cell cycle</b>                                      | <b>1.4</b>  | <b>-2.1</b> | <b>1.6</b>  | <b>1.6</b>  | <b>4.8</b>  | <b>7.5</b>  | <b>9.5</b>  |
| L19872          |             |       | AH-receptor                                              | 40516_at          | 7049        | cell cycle                                             | 1.4         | -1.8        | -1.2        | 1.9         | 1.3         | 1.4         | 3.2         |
| U29725          | B           |       | BMK1 alpha kinase                                        | 35617_at          | 7049        | cell cycle                                             | -1.1        | -1.3        | -1.2        | -1.9        | -1.7        | -2.9        | -1.4        |
| <b>U22398</b>   | <b>B</b>    |       | <b>Cdk-inhibitor p57KIP2 (KIP2)</b>                      | <b>1787_at</b>    | <b>7049</b> | <b>cell cycle</b>                                      | <b>1.1</b>  | <b>-1.2</b> | <b>-1.3</b> | <b>-3.0</b> | <b>-4.4</b> | <b>-9.7</b> | <b>-4.9</b> |
| <b>U22398</b>   | <b>B</b>    |       | <b>Cdk-inhibitor p57KIP2 (KIP2)</b>                      | <b>39545_at</b>   | <b>7049</b> | <b>cell cycle</b>                                      | <b>-1.4</b> | <b>1.1</b>  | <b>-1.1</b> | <b>-1.7</b> | <b>-2.3</b> | <b>-3.0</b> | <b>-5.9</b> |
| AF016582        |             |       | checkpoint kinase Chk1 (CHK1)                            | 38920_at          | 7049        | cell cycle                                             | -1.3        | -1.4        | 6.2         | 22.1        | 1.2         | 2.0         | 11.9        |
| U20979          | A           |       | chromatin assembly factor-I p150 subunit                 | 32589_at          | 7049        | cell cycle                                             | 1.1         | -1.4        | -1.2        | -2.0        | 2.7         | 3.9         | 3.1         |
| U20980          | A           |       | chromatin assembly factor-I p60 subunit                  | 36912_at          | 7049        | cell cycle                                             | 3.2         | -1.1        | 1.2         | -2.2        | 9.3         | 5.6         | 3.6         |
| AF020043        | A           |       | chromosome-associated polypeptide (HCAP)                 | 34763_at          | 7049        | cell cycle                                             | 1.1         | 1.5         | -1.1        | 2.2         | 1.8         | 1.7         | 3.0         |
| X54942          | A           |       | cks2s2 Cks1 protein homologue                            | 40690_at          | 7049        | cell cycle                                             | 1.0         | -1.1        | 1.3         | 1.0         | 1.4         | 2.5         | 2.3         |
| U28963          | B           |       | Gps2 (GPS2)                                              | 35653_at          | 7049        | cell cycle                                             | 1.2         | -2.0        | -1.1        | -1.9        | -2.7        | -3.8        | -1.4        |
| D64137          | B           |       | KIP2 gene Cdk-inhibitor p57KIP2                          | 38673_s_at        | 7049        | cell cycle                                             | 1.2         | 1.0         | -1.2        | -2.8        | -4.0        | -10.0       | -5.0        |
| <b>AF053305</b> | <b>A</b>    |       | <b>mitotic checkpoint kinase Bub1 (BUB1)</b>             | <b>41081_at</b>   | <b>7049</b> | <b>cell cycle</b>                                      | <b>1.2</b>  | <b>1.3</b>  | <b>-5.3</b> | <b>2.1</b>  | <b>2.2</b>  | <b>7.2</b>  | <b>7.6</b>  |
| <b>AF011468</b> | <b>A</b>    |       | <b>serine/threonine kinase (BTAk)</b>                    | <b>34851_at</b>   | <b>7049</b> | <b>cell cycle</b>                                      | <b>1.0</b>  | <b>1.4</b>  | <b>1.1</b>  | <b>1.0</b>  | <b>1.6</b>  | <b>2.7</b>  | <b>4.9</b>  |
| <b>AF011468</b> | <b>A</b>    |       | <b>serine/threonine kinase (BTAk)</b>                    | <b>34852_g_at</b> | <b>7049</b> | <b>cell cycle</b>                                      | <b>1.1</b>  | <b>1.0</b>  | <b>1.4</b>  | <b>1.2</b>  | <b>1.3</b>  | <b>2.4</b>  | <b>3.9</b>  |
| AF015254        | A           |       | serine/threonine kinase (STK-1), complete cds /c         | 33266_at          | 7049        | cell cycle                                             | 2.1         | 1.1         | 1.1         | 1.0         | 2.5         | 1.9         | 4.4         |
| AF003001        |             |       | TTAGGG repeat binding factor 1 (hTRF1-AS)                | 32257_f_at        | 7049        | cell cycle                                             | 7.0         | 9.2         | 1.2         | 1.5         | 1.2         | -2.9        | 2.9         |
| X07024          |             |       | X chromosome mRNA for CCG1 protein                       | 112_g_at          | 7049        | cell cycle                                             | 3.1         | 1.2         | 2.7         | -1.9        | -1.2        | -1.7        | 1.2         |
| <b>V00568</b>   |             |       | <b>encoding the c-myc oncogene</b>                       | <b>1973_s_at</b>  | <b>7050</b> | <b>cell cycle arrest</b>                               | <b>1.0</b>  | <b>1.0</b>  | <b>4.4</b>  | <b>1.8</b>  | <b>1.5</b>  | <b>1.3</b>  | <b>4.5</b>  |
| L13698          | B           |       | gast1 gene                                               | 661_at            | 7050        | cell cycle arrest                                      | 1.1         | 1.3         | -2.2        | -2.1        | -1.5        | -3.7        | -8.6        |
| <b>M60974</b>   | <b>A</b>    |       | <b>growth arrest and DNA-damage-inducible protein</b>    | <b>1911_s_at</b>  | <b>7050</b> | <b>cell cycle arrest</b>                               | <b>1.2</b>  | <b>1.1</b>  | <b>-1.2</b> | <b>2.1</b>  | <b>1.5</b>  | <b>1.6</b>  | <b>4.5</b>  |
| L25876          | A           |       | protein tyrosine phosphatase (CIP2)                      | 1599_at           | 7050        | cell cycle arrest                                      | 2.0         | 1.0         | -2.4        | -1.8        | 2.1         | 2.6         | 8.1         |
| <b>U03106</b>   |             |       | <b>wild-type p53 activated fragment-1 (WAF1)</b>         | <b>2031_s_at</b>  | <b>7050</b> | <b>cell cycle arrest</b>                               | <b>1.0</b>  | <b>-1.2</b> | <b>-1.4</b> | <b>-2.8</b> | <b>-2.1</b> | <b>-1.5</b> | <b>-1.2</b> |
| <b>U22398</b>   | <b>B</b>    |       | <b>Cdk-inhibitor p57KIP2 (KIP2)</b>                      | <b>1787_at</b>    | <b>7050</b> | <b>cell cycle arrest</b>                               | <b>1.1</b>  | <b>-1.2</b> | <b>-1.3</b> | <b>-3.0</b> | <b>-4.4</b> | <b>-9.7</b> | <b>-4.9</b> |

| GenBank     |       |                                                       | Affymetrix   |       |                                                               | Fold Change |      |      |      |      |       |       |
|-------------|-------|-------------------------------------------------------|--------------|-------|---------------------------------------------------------------|-------------|------|------|------|------|-------|-------|
| Accession # | Group | Affymetric Gene Annotation                            | Probe set id | GO id | GO Biological Process                                         | 0           | 4    | 6    | 8    | 12   | 16    | 24    |
| U22398      | B     | Cdk-inhibitor p57KIP2 (KIP2)                          | 39545_at     | 7050  | cell cycle arrest                                             | -1.4        | 1.1  | 1.1  | -1.7 | -2.3 | -3.0  | -5.9  |
| V00568      | A     | c-myc oncogene                                        | 37724_at     | 7050  | cell cycle arrest                                             | -1.2        | 1.2  | 2.5  | 2.1  | 1.6  | 1.9   | 3.6   |
| L13698      | B     | gas1 gene                                             | 41839_at     | 7050  | cell cycle arrest                                             | 1.2         | 1.2  | -2.0 | -1.8 | -1.5 | -2.8  | -10.6 |
| D64137      | B     | KIP2 gene Cdk-inhibitor p57KIP2                       | 38673_s_at   | 7050  | cell cycle arrest                                             | 1.2         | 1.0  | -1.2 | -2.8 | -4.0 | -10.0 | -5.0  |
| S78467      | A     | glycoinositol phospholipid anchor synthetic element   | 221_s_at     | 7050  | cell cycle arrest                                             | -2.6        | -1.5 | 2.0  | 2.7  | 2.1  | 1.3   | 2.6   |
| M86699      | A     | kinase (TTK), complete cds                            | 572_at       | 7052  | mitotic spindle assembly                                      | 1.7         | 1.2  | -1.5 | 2.5  | 6.0  | 7.2   | 11.3  |
| AF020043    | A     | chromosome-associated polypeptide (HCAP)              | 34763_at     | 7052  | mitotic spindle assembly                                      | 1.1         | 1.5  | -1.1 | 2.2  | 1.8  | 1.7   | 3.0   |
| AL021707    | A     | DNA sequence from clone 508115 on chromosome 22q12-13 | 35336_at     | 7052  | mitotic spindle assembly                                      | 1.2         | 1.2  | 1.2  | 1.2  | 1.2  | 1.1   | 2.8   |
| U37426      | A     | kinasin-like spindle protein HKSP (hKSP)              | 46726_at     | 7052  | mitotic spindle assembly                                      | 1.2         | -1.1 | -2.0 | 1.3  | 1.9  | 3.2   | 4.1   |
| AF020043    | A     | chromosome-associated polypeptide (HCAP)              | 34763_at     | 7059  | chromosome segregation                                        | 1.1         | 1.5  | -1.1 | 2.2  | 1.8  | 1.7   | 3.0   |
| AF020043    | A     | chromosome-associated polypeptide (HCAP)              | 34763_at     | 7062  | sister chromatid cohesion                                     | 1.1         | 1.5  | -1.1 | 2.2  | 1.8  | 1.7   | 3.0   |
| X51688      | A     | cyclin A                                              | 40697_at     | 7067  | mitosis                                                       | 2.0         | -1.3 | 1.7  | 2.2  | 2.1  | 2.5   | 5.8   |
| D88357      | A     | CDC2 delta T                                          | 33324_s_at   | 7067  | mitosis                                                       | 1.7         | 1.6  | 1.3  | 1.7  | 1.9  | 8.4   | 8.1   |
| AB019987    | A     | chromosome-associated polypeptide-C                   | 34878_at     | 7067  | mitosis                                                       | 1.2         | 1.0  | -1.1 | 1.7  | 2.3  | 4.2   | 5.7   |
| X51688      | A     | cyclin A                                              | 1943_at      | 7067  | mitosis                                                       | 1.0         | -1.7 | 3.2  | -1.3 | 2.4  | 4.4   | 6.1   |
| Z36714      | A     | cyclin F                                              | 1925_at      | 7067  | mitosis                                                       | 1.1         | -1.5 | -2.7 | 1.3  | 1.7  | 1.7   | 3.4   |
| AB024704    | A     | fls353                                                | 39109_at     | 7067  | mitosis                                                       | 1.1         | 1.3  | -1.1 | 1.1  | 2.5  | 4.5   | 6.4   |
| D38553      | A     | KIAA0074                                              | 41639_at     | 7067  | mitosis                                                       | -1.1        | -1.2 | -1.3 | 2.1  | 9.5  | 2.0   | 11.2  |
| D63880      | A     | KIAA0159                                              | 35314_at     | 7067  | mitosis                                                       | 1.2         | 1.0  | 1.5  | -1.2 | -1.2 | 1.8   | 3.4   |
| D79988      | A     | KIAA0166                                              | 37469_at     | 7067  | mitosis                                                       | 3.9         | 1.5  | -1.2 | 1.0  | 2.4  | 1.3   | 3.5   |
| AJ000186    | A     | MAD2 protein                                          | 37282_at     | 7067  | mitosis                                                       | -1.4        | 1.3  | -4.1 | 2.8  | 14.4 | 13.9  | 3.8   |
| X05360      | A     | CDC2 gene involved in cell cycle control              | 1803_at      | 7067  | mitosis                                                       | -1.5        | 1.1  | 1.6  | 1.8  | 2.8  | 2.8   | 4.6   |
| U66838      | A     | cyclin A1                                             | 1914_at      | 7067  | mitosis                                                       | 1.6         | -1.1 | 2.0  | 2.7  | 3.4  | 3.4   | 11.1  |
| M25753      | A     | cyclin B, 3 end                                       | 34736_at     | 7067  | mitosis                                                       | 1.8         | -1.2 | -1.3 | 1.6  | 3.2  | 2.7   | 6.1   |
| U65410      | A     | Mad2 (hsmad2), complete cds                           | 1739_at      | 7067  | mitosis                                                       | 1.4         | -2.1 | 1.6  | 4.8  | 4.8  | 7.5   | 9.5   |
| M81933      | A     | cdc25A                                                | 35407_at     | 7067  | mitosis                                                       | 1.4         | -1.5 | -1.5 | 1.4  | 5.8  | 4.2   | 3.8   |
| M81933      | A     | cdc25A                                                | 35407_at     | 7067  | mitosis                                                       | -2.3        | -1.1 | 1.8  | 1.1  | 5.6  | 4.4   | 6.2   |
| S78187      | A     | CDC25Hu2=cdc25+ homolog                               | 1347_at      | 7067  | mitosis                                                       | 1.3         | 1.0  | 1.1  | 1.3  | 1.8  | 2.6   | 3.9   |
| Y00272      | A     | cell cycle control gene CDC2                          | 40915_r_at   | 7067  | mitosis                                                       | -1.8        | -1.1 | -1.5 | 1.2  | 1.5  | 7.8   | 3.9   |
| AF092563    | A     | chromosome-associated protein-E (hCAP-E)              | 37502_at     | 7067  | mitosis                                                       | -2.0        | 1.0  | 1.4  | 5.5  | 1.5  | 5.1   | 3.4   |
| AF052151    | B     | clone 24574 sequence                                  | 32209_at     | 7067  | mitosis                                                       | 1.2         | -1.1 | 1.2  | -1.4 | -1.3 | -2.6  | -1.6  |
| M25753      | A     | cyclin B                                              | 1945_at      | 7067  | mitosis                                                       | 2.0         | 1.0  | -1.6 | 1.2  | 2.4  | 2.9   | 7.2   |
| U30872      | A     | mitosin                                               | 37302_at     | 7067  | mitosis                                                       | 1.1         | -1.2 | -1.2 | -1.7 | 1.1  | 5.1   | 5.7   |
| U63743      | A     | mitotic centromere-associated kinesin                 | 36837_at     | 7067  | mitosis                                                       | 1.6         | 1.4  | -9.6 | -5.2 | 7.6  | 4.9   | 10.9  |
| AF053305    | A     | mitotic checkpoint kinase Bub1 (BUB1)                 | 41081_at     | 7067  | mitosis                                                       | 1.2         | 1.3  | -5.3 | 2.1  | 2.2  | 7.2   | 7.6   |
| U05340      | A     | p53CDC                                                | 38414_at     | 7067  | mitosis                                                       | 1.5         | 1.0  | 1.3  | 1.0  | 1.7  | 4.0   | 4.5   |
| U01038      | A     | pLK                                                   | 37228_at     | 7067  | mitosis                                                       | 1.1         | 1.1  | 1.5  | -1.5 | 5.7  | 1.9   | 6.6   |
| AF017790    | A     | retinoblastoma-associated protein HEC                 | 40041_at     | 7067  | mitosis                                                       | 1.2         | 2.0  | 1.3  | -1.4 | 2.9  | 10.1  | 16.3  |
| AF011468    | A     | serine/threonine kinase (BTK)                         | 34851_at     | 7067  | mitosis                                                       | 1.0         | 1.4  | 1.1  | 1.0  | 1.6  | 2.7   | 4.9   |
| AF011468    | A     | serine/threonine kinase (BTK)                         | 34852_g_at   | 7067  | mitosis                                                       | 1.1         | 1.0  | 1.4  | 1.2  | 1.3  | 2.4   | 3.9   |
| AF003001    | A     | TTAGGG repeat binding factor 1 (hTRF1-AS)             | 32257_f_at   | 7067  | mitosis                                                       | 7.0         | 9.2  | 1.2  | 1.5  | 1.2  | -2.9  | 2.9   |
| X82048      | A     | Wee1                                                  | 36909_at     | 7067  | mitosis                                                       | 1.1         | 2.4  | -1.5 | 2.0  | 4.1  | 3.4   | 3.9   |
| AL080146    | A     | DKFZp348B174                                          | 32263_at     | 7067  | mitosis                                                       | 1.8         | -1.7 | -1.4 | -2.8 | -1.3 | 2.0   | 5.6   |
| AB019987    | A     | chromosome-associated polypeptide-C                   | 34878_at     | 7076  | mitotic chromosome condensation                               | 1.2         | 1.0  | -1.1 | 1.7  | 2.3  | 4.2   | 5.7   |
| D38553      | A     | KIAA0074                                              | 41639_at     | 7076  | mitotic chromosome condensation                               | -1.1        | -1.2 | -1.3 | 2.1  | 9.5  | 2.0   | 11.2  |
| D63880      | A     | KIAA0159                                              | 35314_at     | 7076  | mitotic chromosome condensation                               | 1.2         | 1.0  | 1.5  | -1.2 | -1.2 | 1.8   | 3.4   |
| AF092563    | A     | chromosome-associated protein-E (hCAP-E)              | 37502_at     | 7076  | mitotic chromosome condensation                               | -2.0        | 1.0  | 1.4  | 5.5  | 1.5  | 5.1   | 3.4   |
| Z15005      | A     | CENP-E                                                | 37173_at     | 7079  | mitotic chromosome movement                                   | 1.1         | -1.6 | 4.9  | 8.6  | 7.3  | 9.9   | 23.7  |
| Z15005      | A     | CENP-E                                                | 37173_at     | 7080  | mitotic metaphase plate congression                           | 1.1         | -1.6 | 4.9  | 8.6  | 7.3  | 9.9   | 23.7  |
| U30872      | A     | mitosin                                               | 37302_at     | 7088  | regulation of mitosis                                         | 1.1         | -1.2 | -1.2 | -1.7 | 1.1  | 5.1   | 5.7   |
| D88357      | A     | CDC2 delta T                                          | 33324_s_at   | 7089  | start control point of mitotic cell cycle                     | 1.7         | 1.6  | 1.3  | 1.7  | 1.9  | 8.4   | 8.1   |
| X05360      | A     | CDC2 gene involved in cell cycle control              | 1803_at      | 7089  | start control point of mitotic cell cycle                     | -1.5        | 1.1  | 1.6  | 1.8  | 2.8  | 2.8   | 4.6   |
| M68520      | A     | cdc2-related protein kinase                           | 1792_g_at    | 7089  | start control point of mitotic cell cycle                     | -1.1        | 1.3  | 1.5  | 1.5  | 2.1  | 2.6   | 1.4   |
| Y00272      | A     | cell cycle control gene CDC2                          | 40915_r_at   | 7089  | start control point of mitotic cell cycle                     | -1.8        | -1.1 | -1.5 | 1.2  | 1.5  | 7.8   | 3.9   |
| U43746      | A     | breast cancer susceptibility (BRCA2)                  | 1989_at      | 7090  | regulation of S phase of mitotic cell cycle                   | -2.3        | 1.3  | 1.6  | -1.3 | 1.6  | 3.2   | 6.7   |
| D79988      | A     | KIAA0166                                              | 37469_at     | 7093  | mitotic checkpoint                                            | 3.9         | 1.5  | -1.2 | 1.0  | 2.4  | 1.3   | 3.5   |
| AJ000186    | A     | MAD2 protein                                          | 37282_at     | 7093  | mitotic checkpoint                                            | -1.4        | 1.3  | -4.1 | 2.8  | 14.4 | 13.9  | 3.8   |
| U65410      | A     | Mad2 (hsmad2), complete cds                           | 1720_at      | 7093  | mitotic checkpoint                                            | 1.4         | -2.1 | 1.6  | 1.6  | 4.8  | 7.5   | 9.5   |
| U43746      | A     | breast cancer susceptibility (BRCA2)                  | 1989_at      | 7093  | mitotic checkpoint                                            | -2.3        | 1.3  | 1.6  | -1.3 | 1.6  | 3.2   | 6.7   |
| M86699      | A     | kinase (TTK), complete cds                            | 572_at       | 7094  | mitotic spindle checkpoint                                    | 1.7         | 1.2  | -1.5 | 2.5  | 6.0  | 7.2   | 11.3  |
| AF053305    | A     | mitotic checkpoint kinase Bub1 (BUB1)                 | 41081_at     | 7094  | mitotic spindle checkpoint                                    | 1.2         | 1.3  | -5.3 | 2.1  | 2.2  | 7.2   | 7.6   |
| X51688      | A     | cyclin A                                              | 40697_at     | 7095  | mitotic G2 checkpoint                                         | 2.0         | -1.3 | 1.7  | 2.2  | 2.1  | 2.5   | 5.8   |
| X51688      | A     | cyclin A                                              | 1943_at      | 7095  | mitotic G2 checkpoint                                         | 1.0         | -1.7 | 3.2  | -1.3 | 2.4  | 4.4   | 6.1   |
| D79988      | A     | KIAA0166                                              | 37469_at     | 7096  | regulation of exit from mitosis                               | 3.9         | 1.5  | -1.2 | 1.0  | 2.4  | 1.3   | 3.5   |
| AL021707    | A     | DNA sequence from clone 508115 on chromosome 22q12-13 | 35336_at     | 7097  | nuclear migration                                             | 1.2         | 1.2  | 1.2  | 1.2  | 1.2  | 1.1   | 2.8   |
| X28386      | A     | nuclear localization sequence receptor hSRP1alpha     | 44007_at     | 7102  | spindle pole body and microtubule cycle (sensu Saccharomyces) | 1.3         | 1.2  | -2.3 | 1.2  | 1.7  | 2.3   | 3.5   |
| X53587      | A     | integrin beta 4                                       | 406_at       | 7125  | invasive growth                                               | 1.2         | -1.4 | 1.2  | -1.6 | 1.3  | 1.3   | 4.2   |
| L06797      | B     | (clone L5) orphan G protein-coupled receptor          | 649_s_at     | 7125  | invasive growth                                               | 1.5         | 1.2  | -1.4 | -1.8 | -1.2 | -1.4  | -2.6  |
| L19711      | B     | dystryglican (DAG1)                                   | 36989_at     | 7125  | invasive growth                                               | -1.1        | -1.2 | -1.1 | -2.4 | -2.3 | -2.1  | -3.1  |
| M60278      | A     | heparin-binding EGF-like growth factor                | 38037_at     | 7125  | invasive growth                                               | 1.3         | 1.5  | 2.7  | 1.8  | 2.3  | 2.8   | 33.8  |
| X64116      | A     | PVR gene poliovirus receptor (exon 1)                 | 32698_at     | 7125  | invasive growth                                               | 1.4         | -1.1 | 2.8  | 1.1  | 1.2  | 1.7   | 3.1   |
| X64116      | A     | PVR gene poliovirus receptor (exon 1)                 | 32699_s_at   | 7125  | invasive growth                                               | 1.4         | -1.1 | 2.8  | 1.1  | 1.2  | 1.7   | 3.1   |
| Y08837      | A     | RAD51-like protein (XRCC2)                            | 1300_at      | 7126  | meiosis                                                       | 1.0         | -1.8 | -4.5 | 2.1  | 1.6  | 1.9   | 2.4   |
| X97795      | A     | homologous to S. cerevisiae RAD54                     | 966_at       | 7126  | meiosis                                                       | -1.2        | -1.2 | 1.3  | -1.3 | 1.8  | 1.9   | 2.9   |
| U66838      | A     | cyclin A1                                             | 1914_at      | 7126  | meiosis                                                       | 1.6         | -1.1 | 2.0  | 2.7  | 3.4  | 3.4   | 11.1  |
| AF020043    | A     | chromosome-associated polypeptide (HCAP)              | 34763_at     | 7126  | meiosis                                                       | 1.1         | 1.5  | -1.1 | 2.2  | 1.8  | 1.7   | 3.0   |
| AF016582    | A     | checkpoint kinase Chk1 (CHK1)                         | 38820_at     | 7131  | meiotic recombination                                         | -1.3        | -1.4 | 6.2  | 22.1 | 1.2  | 2.0   | 11.9  |
| U28455      | A     | phosphatidylinositol 3-kinase homolog (ATM)           | 2000_at      | 7131  | meiotic recombination                                         | 1.5         | 1.3  | 1.0  | 1.6  | -1.5 | -2.5  | 1.4   |
| AF034956    | A     | RAD51D                                                | 37793_r_at   | 7131  | meiotic recombination                                         | 2.1         | 1.3  | -1.1 | 2.9  | 2.0  | -1.3  | -1.1  |

| GenBank     |       |                                                                    | Affymetrix   |       |                                                   | Fold Change |      |       |      |       |       |      |
|-------------|-------|--------------------------------------------------------------------|--------------|-------|---------------------------------------------------|-------------|------|-------|------|-------|-------|------|
| Accession # | Group | Affymetric Gene Annotation                                         | Probe set id | GO id | GO Biological Process                             | 0           | 4    | 6     | 8    | 12    | 16    | 24   |
| L26336      | B     | heat shock protein HSPA2                                           | 36925_at     | 7140  | male meiosis                                      | -1.5        | 1.2  | -1.4  | -1.3 | -1.2  | -2.2  | -3.4 |
| U66838      | A     | cyclin A1                                                          | 1914_at      | 7141  | male meiosis I                                    | 1.6         | -1.1 | 2.0   | 2.7  | 3.4   | 3.4   | 11.1 |
| AF006259    | A     | Rad51-interacting protein                                          | 35397_at     | 7145  | recombination                                     | -1.4        | 2.8  | -1.5  | -1.3 | 1.0   | 4.3   | 3.9  |
| Y13492      |       | smoothelin-B                                                       | 31830_s_at   | 7148  | cell shape and cell size control                  | 1.3         | -2.0 | -1.2  | -1.2 | 1.0   | 1.1   | 4.7  |
| X01703      | B     | gene alpha-tubulin (b alpha 1)                                     | 40567_at     | 7148  | cell shape and cell size control                  | -1.5        | -1.3 | -1.8  | -1.7 | -1.3  | -2.6  | -2.6 |
| U22815      |       | LAR-interacting protein 1a                                         | 41781_at     | 7148  | cell shape and cell size control                  | -1.1        | -1.1 | 1.4   | 1.9  | 1.5   | 2.7   | 1.0  |
| AF045941    |       | scellin (SCEL)                                                     | 35105_at     | 7148  | cell shape and cell size control                  | -2.6        | 1.0  | 1.1   | 1.5  | 1.6   | 1.1   | 1.4  |
| AF099730    |       | connexin 31 (GJB3) gene                                            | 41076_at     | 7154  | cell communication                                | -1.1        | -6.8 | 1.9   | 1.1  | 2.1   | 4.7   | 3.6  |
| AF099731    |       | connexin 31.1 (GJB5)                                               | 38903_at     | 7154  | cell communication                                | 1.0         | 1.2  | 2.6   | 1.2  | 1.7   | 1.7   | 1.2  |
| AF025441    |       | Opa-interacting protein OIP5                                       | 37474_at     | 7154  | cell communication                                | 1.3         | 12.5 | -8.2  | 1.6  | 5.6   | 2.9   | 3.1  |
| U77914      | A     | soluble protein Jagged                                             | 35414_s_at   | 7154  | cell communication                                | 1.2         | 1.2  | -1.3  | 1.4  | 1.7   | 1.6   | 2.9  |
| X14787      |       | thrombospondin                                                     | 115_at       | 7155  | cell adhesion                                     | 1.0         | -1.7 | -1.3  | 1.1  | 1.1   | 1.0   | 2.5  |
| D38163      |       | a1(XIX) collagen chain                                             | 34018_at     | 7155  | cell adhesion                                     | 3.7         | -1.7 | -4.4  | 1.5  | -1.1  | -4.0  | 1.0  |
| X78947      | A     | connective tissue growth factor                                    | 36838_at     | 7155  | cell adhesion                                     | -1.4        | 1.1  | -1.1  | 3.0  | 4.2   | 2.7   | 4.4  |
| Z29083      | A     | 5T4 gene 5T4 Oncofetal antigen                                     | 368_at       | 7155  | cell adhesion                                     | 1.6         | -1.1 | 1.6   | 1.6  | 1.7   | 1.1   | 2.6  |
| U59325      |       | cadherin-14                                                        | 173_at       | 7155  | cell adhesion                                     | -10.1       | 2.7  | -4.8  | -1.5 | 1.0   | -2.1  | 1.2  |
| D13666      |       | osf-2 osteoblast specific factor                                   | 1451_s_at    | 7155  | cell adhesion                                     | -9.9        | -3.4 | -40.9 | -1.8 | 4.0   | 3.6   | -6.6 |
| D17517      |       | Sky                                                                | 2086_s_at    | 7155  | cell adhesion                                     | 1.4         | 1.2  | -1.7  | -1.1 | 2.3   | 2.5   | 1.7  |
| M76482      | B     | 130-kD pemphigus vulgaris antigen                                  | 33693_at     | 7155  | cell adhesion                                     | -1.4        | 1.1  | -1.5  | 1.1  | -1.1  | -1.3  | -2.8 |
| U91512      |       | adhesion molecule ninjurin                                         | 41475_at     | 7155  | cell adhesion                                     | -1.1        | -1.1 | -5.8  | -7.0 | -11.6 | -1.3  | -3.1 |
| U37139      | A     | beta 3-endonexin , long m and short m                              | 38501_s_at   | 7155  | cell adhesion                                     | 1.0         | 1.1  | 1.1   | 1.7  | 1.5   | 3.1   | 3.1  |
| U58516      |       | breast epithelial antigen BA46                                     | 34403_at     | 7155  | cell adhesion                                     | -1.8        | 1.0  | 2.6   | -1.1 | -1.1  | 1.2   | -1.6 |
| L34060      |       | cadherin-8 , complete cds                                          | 1484_at      | 7155  | cell adhesion                                     | -1.4        | 1.9  | 2.6   | 1.0  | 1.7   | -1.4  | 1.8  |
| AF100780    | B     | connective tissue growth factor related protein WISP-2             | 35898_at     | 7155  | cell adhesion                                     | -1.3        | -1.2 | -1.3  | -1.6 | -1.7  | -1.9  | -3.8 |
| Y12642      | B     | E48 gene                                                           | 36284_at     | 7155  | cell adhesion                                     | 1.1         | -1.1 | -1.6  | -2.3 | -2.3  | -2.6  | -2.4 |
| AB007865    | A     | KIAA0405                                                           | 34853_at     | 7155  | cell adhesion                                     | 1.0         | 1.4  | -1.5  | 1.3  | 1.5   | 2.4   | 2.5  |
| X79683      | B     | LAMB2 beta2 laminin                                                | 38812_at     | 7155  | cell adhesion                                     | -1.3        | -1.1 | -1.3  | -2.1 | -1.6  | -2.5  | -3.6 |
| U31201      | A     | laminin gamma2 chain gene (LAMC2)                                  | 35281_at     | 7155  | cell adhesion                                     | 1.7         | -1.6 | 4.5   | 1.3  | 11.4  | 4.7   | 8.0  |
| U17760      | A     | laminin S B3 chain (LAMB3)                                         | 36929_at     | 7155  | cell adhesion                                     | 1.0         | -1.2 | 1.1   | 1.0  | 1.8   | 2.2   | 4.7  |
| U18934      |       | receptor tyrosine kinase (DTK)                                     | 35246_at     | 7155  | cell adhesion                                     | 1.2         | 1.3  | -1.5  | -1.2 | 2.3   | 2.9   | 1.6  |
| AF040990    |       | roundabout 1 (robo1)                                               | 32944_at     | 7155  | cell adhesion                                     | -2.8        | -1.1 | -3.6  | 1.4  | -1.2  | -1.2  | 1.3  |
| N36267      |       | Soares melanocyte 2NbHM                                            | 2029_at      | 7155  | cell adhesion                                     | 1.1         | -1.3 | 4.1   | 1.7  | 1.1   | 1.2   | -1.4 |
| W27953      |       | 39h7 cDNA                                                          | 31502_at     | 7155  | cell adhesion                                     | 1.5         | 1.6  | 2.3   | -1.2 | -1.7  | -3.6  | -2.6 |
| AL031228    |       | dJ1033B10.10 (membrane protein with histidine rich charge cluster) | 41652_at     | 7155  | cell adhesion                                     | 2.4         | 2.9  | 2.2   | 2.3  | 1.4   | 1.1   | -1.3 |
| AB011535    | B     | MEGF1                                                              | 38202_at     | 7156  | homophilic cell adhesion                          | 1.7         | 1.3  | -2.1  | -1.7 | -1.1  | -2.7  | -2.2 |
| U59325      |       | cadherin-14                                                        | 173_at       | 7156  | homophilic cell adhesion                          | -10.1       | 2.7  | -4.8  | -1.5 | 1.0   | -2.1  | 1.2  |
| AF024710    | A     | vascular endothelial growth factor (VE)                            | 1953_at      | 7156  | homophilic cell adhesion                          | 1.4         | -1.3 | 1.0   | 1.8  | 1.4   | 1.1   | 5.8  |
| M76482      | B     | 130-kD pemphigus vulgaris antigen                                  | 33693_at     | 7156  | homophilic cell adhesion                          | -1.4        | 1.1  | -1.5  | 1.1  | -1.1  | -1.3  | -2.8 |
| L34060      |       | cadherin-8 , complete cds                                          | 1484_at      | 7156  | homophilic cell adhesion                          | -1.4        | 1.9  | 2.6   | 1.0  | 1.7   | -1.4  | 1.8  |
| AF022375    | A     | vascular endothelial growth factor                                 | 36100_at     | 7156  | homophilic cell adhesion                          | 1.0         | -1.1 | 1.4   | 1.8  | 1.4   | 1.9   | 4.9  |
| M63978      | A     | vascular endothelial growth factor gene                            | 36101_s_at   | 7156  | homophilic cell adhesion                          | 2.5         | -1.9 | 2.8   | 2.0  | 2.2   | 1.2   | 16.5 |
| X84559      |       | tetranectin                                                        | 36569_at     | 7157  | heterophilic cell adhesion                        | -2.6        | -1.2 | -2.6  | 1.2  | 1.7   | -1.2  | 1.0  |
| X15998      | A     | the chondroitin sulphate proteoglycan versican, V1                 | 38114_at     | 7157  | heterophilic cell adhesion                        | 1.4         | -1.4 | -1.2  | 1.5  | 1.0   | 4.2   | 3.5  |
| X15998      | A     | the chondroitin sulphate proteoglycan versican, V1                 | 38112_g_at   | 7157  | heterophilic cell adhesion                        | 1.2         | -1.1 | -1.4  | 1.4  | 2.6   | 5.3   | 2.9  |
| U41514      | A     | UDP-GalNAc-polyphosphate N-acetylgalactosaminyltransferase         | 38041_at     | 7157  | heterophilic cell adhesion                        | -1.1        | -1.1 | 1.0   | 2.6  | 2.0   | 1.8   | 1.2  |
| X53587      | A     | Integrin beta 4                                                    | 406_at       | 7160  | cell-matrix adhesion                              | 1.2         | -1.4 | 1.2   | -1.6 | 1.3   | 1.3   | 4.2  |
| AB011792    |       | extracellular matrix protein                                       | 39673_i_at   | 7160  | cell-matrix adhesion                              | -1.2        | 1.8  | -1.2  | 1.0  | -1.2  | -1.3  | 3.0  |
| AB011792    |       | extracellular matrix protein, complete cds /cd                     | 39674_r_at   | 7160  | cell-matrix adhesion                              | -1.7        | 1.3  | 1.3   | -1.7 | -2.6  | -2.3  | 2.2  |
| X06256      | A     | integrin alpha 5 subunit                                           | 39753_at     | 7160  | cell-matrix adhesion                              | -1.2        | -1.2 | -2.6  | 1.3  | 1.8   | 1.6   | 3.7  |
| X17033      | A     | integrin alpha-2 subunit                                           | 1978_at      | 7160  | cell-matrix adhesion                              | 1.4         | -1.4 | 2.1   | 3.4  | 4.4   | 5.0   | 7.1  |
| X53002      | A     | integrin beta-5 subunit                                            | 39754_at     | 7160  | cell-matrix adhesion                              | 1.0         | 1.2  | 1.1   | 1.9  | 4.0   | 7.1   | 4.6  |
| X68742      | A     | integrin, alpha subunit                                            | 120_at       | 7160  | cell-matrix adhesion                              | 1.0         | 1.6  | 1.8   | -1.2 | 1.3   | 3.3   | 2.8  |
| M35011      | A     | integrin beta-5 subunit                                            | 2058_s_at    | 7160  | cell-matrix adhesion                              | 1.0         | 1.0  | 1.3   | 1.1  | 2.2   | 3.2   | 3.5  |
| M69911      |       | integrin alpha-3 chain                                             | 885_g_at     | 7160  | cell-matrix adhesion                              | 1.2         | -1.7 | -1.7  | -1.5 | 1.1   | 1.3   | 6.5  |
| M69911      | A     | integrin alpha-3 chain                                             | 884_at       | 7160  | cell-matrix adhesion                              | 1.2         | -1.4 | 1.0   | -1.2 | 1.5   | 1.3   | 3.4  |
| M73780      |       | integrin beta-8 subunit                                            | 889_at       | 7160  | cell-matrix adhesion                              | -1.2        | 1.7  | -4.3  | 3.2  | -1.3  | -1.2  | 1.1  |
| U22815      |       | LAR-interacting protein 1a                                         | 41781_at     | 7160  | cell-matrix adhesion                              | -1.1        | -1.1 | 1.4   | 1.9  | 1.5   | 2.7   | 1.0  |
| S66213      | A     | integrin alpha 6B                                                  | 33410_at     | 7160  | cell-matrix adhesion                              | 1.3         | -1.1 | 1.7   | 1.9  | 1.8   | 2.5   | 3.7  |
| S66213      | A     | integrin alpha 6B                                                  | 33411_g_at   | 7160  | cell-matrix adhesion                              | 1.6         | -1.1 | -1.5  | 2.5  | 2.2   | 2.4   | 3.1  |
| X69550      |       | rho GDP-dissociation inhibitor 1                                   | 40164_at     | 7162  | negative regulation of cell adhesion              | 1.3         | -2.0 | -1.6  | -2.5 | -2.0  | -2.2  | 1.4  |
| N48190      |       | yz03f09 s1 cDNA                                                    | 41254_at     | 7162  | negative regulation of cell adhesion              | -4.3        | 1.0  | 1.3   | 1.0  | 1.7   | -9.7  | 1.4  |
| U02390      | B     | adenylyl cyclase-associated protein homolog CAP2 (CAP2)            | 33404_at     | 7163  | establishment and/or maintenance of cell polarity | -2.0        | 1.0  | -1.1  | -1.4 | -2.0  | 1.4   | -8.2 |
| L37882      | B     | frizzled gene product                                              | 36799_at     | 7164  | establishment of tissue polarity                  | 1.6         | -1.6 | 1.0   | -3.2 | -2.7  | -5.3  | -3.6 |
| U43318      |       | putative transmembrane receptor (frizzled 5)                       | 34997_r_at   | 7164  | establishment of tissue polarity                  | -1.9        | -1.8 | 1.5   | -2.6 | -1.2  | 1.4   | 1.2  |
| X89101      |       | Fas (Apo-1, CD95)                                                  | 1808_r_at    | 7165  | signal transduction                               | 1.7         | -1.3 | 2.0   | 1.8  | 1.2   | 5.7   | -1.1 |
| X83490      |       | Fas/Apo-1                                                          | 1440_s_at    | 7165  | signal transduction                               | -1.1        | -1.1 | 3.9   | 1.7  | 1.4   | 1.6   | 1.4  |
| X99325      |       | Ste20-like kinase                                                  | 399_at       | 7165  | signal transduction                               | 1.3         | -6.0 | 2.5   | -1.6 | 1.0   | -1.4  | 1.3  |
| D14874      |       | adrenomedullin precursor                                           | 34777_at     | 7165  | signal transduction                               | -1.5        | 1.1  | -2.7  | -1.4 | -1.2  | -1.3  | -2.2 |
| AJ224538    | B     | AMP-activated protein kinase beta 2 subunit                        | 36705_at     | 7165  | signal transduction                               | 1.3         | -1.1 | 1.3   | -1.2 | -1.2  | -1.6  | -2.5 |
| Z75190      | A     | apolipoprotein E receptor 2                                        | 32398_s_at   | 7165  | signal transduction                               | 1.6         | 1.7  | 1.5   | 4.4  | 7.8   | 2.4   | 3.6  |
| X03663      |       | c-fms proto-oncogene                                               | 160022_at    | 7165  | signal transduction                               | -1.5        | -2.1 | -1.3  | -1.5 | -2.0  | -10.7 | -1.2 |
| X83492      |       | Fas/Apo-1                                                          | 1441_s_at    | 7165  | signal transduction                               | -1.9        | -1.5 | -2.2  | 2.5  | 1.0   | 3.1   | 1.8  |
| D86963      |       | KIAA0208                                                           | 40873_at     | 7165  | signal transduction                               | 1.2         | -1.4 | 1.4   | -3.0 | 1.5   | 1.2   | 1.4  |
| AB020634    |       | KIAA0827                                                           | 40713_at     | 7165  | signal transduction                               | 1.5         | 6.0  | 11.7  | 1.9  | 1.6   | 6.1   | -2.4 |
| AB023153    | B     | KIAA0936                                                           | 41431_at     | 7165  | signal transduction                               | 1.3         | -1.1 | -1.5  | -1.7 | -2.9  | -1.9  | -2.0 |
| X72308      |       | monocyte chemoattractant protein-3 (MCP-3)                         | 39802_at     | 7165  | signal transduction                               | -1.8        | -1.2 | -1.8  | -3.6 | -1.2  | -1.9  | 1.0  |
| Z36715      | A     | Net transcription factor                                           | 37527_at     | 7165  | signal transduction                               | 1.3         | 1.6  | 1.9   | 1.9  | 2.3   | 3.4   | 2.6  |
| Y07586      | B     | RIT protein                                                        | 38331_at     | 7165  | signal transduction                               | 1.0         | -1.1 | 1.3   | 1.2  | -1.5  | -1.7  | -2.6 |
| X97674      | B     | transcriptional intermediary factor 2                              | 34313_at     | 7165  | signal transduction                               | 2.3         | 1.6  | -1.1  | -1.5 | -1.5  | -1.3  | -2.5 |

| GenBank       | Group    | Affymetric Gene Annotation                                    | Affymetric Probe set id | GO id       | GO Biological Process      | 0           | 4           | 6           | 8           | 12          | 16          | 24          |
|---------------|----------|---------------------------------------------------------------|-------------------------|-------------|----------------------------|-------------|-------------|-------------|-------------|-------------|-------------|-------------|
| D16532        | A        | very low density lipoprotein receptor                         | 36873_at                | 7165        | signal transduction        | -2.3        | -1.1        | -1.8        | 1.2         | -1.1        | 5.5         | 24.2        |
| Y09392        |          | WLSL-LR, WLSL-S1 and WLSL-S2 proteins                         | 41189_at                | 7165        | signal transduction        | -2.0        | -1.6        | -2.8        | 1.1         | 1.2         | 2.9         | 1.4         |
| U83508        | B        | angiotensin-1, complete cds                                   | 1929_at                 | 7165        | signal transduction        | 1.0         | 1.6         | -1.3        | 1.0         | 1.0         | -2.8        | -5.4        |
| U59913        |          | chromosome 5 Mad homolog Smad5                                | 1013_at                 | 7165        | signal transduction        | -1.4        | 1.5         | 1.2         | 2.4         | -1.1        | 3.3         | 1.4         |
| M62397        | B        | colorectal mutant cancer protein                              | 1832_at                 | 7165        | signal transduction        | 1.3         | -1.2        | 1.4         | -1.1        | -1.8        | -3.6        | -2.3        |
| <b>U84388</b> | <b>A</b> | <b>death domain containing protein CRADD</b>                  | <b>1211_s_at</b>        | <b>7165</b> | <b>signal transduction</b> | <b>-1.3</b> | <b>1.3</b>  | <b>-1.3</b> | <b>2.7</b>  | <b>1.5</b>  | <b>1.4</b>  | <b>1.4</b>  |
| U12535        | A        | epidermal growth factor receptor kinase substrate             | 1467_at                 | 7165        | signal transduction        | -1.3        | -1.3        | 1.1         | 2.1         | 1.9         | 3.0         | 4.3         |
| M27543        |          | guanine nucleotide-binding protein (G)                        | 876_at                  | 7165        | signal transduction        | -1.2        | 1.9         | -2.7        | 3.6         | 2.6         | 1.0         | 1.0         |
| X52425        | A        | IL-4-R beta interleukin 4 receptor                            | 404_at                  | 7165        | signal transduction        | 1.3         | -1.2        | 2.3         | 1.8         | 2.4         | 1.8         | 2.9         |
| U19247        | B        | interferon-gamma receptor alpha chain                         | 1038_s_at               | 7165        | signal transduction        | -1.2        | 1.0         | -1.2        | 1.5         | -1.4        | -2.2        | -4.0        |
| M60828        |          | keratinocyte growth factor, complete cds                      | 1380_at                 | 7165        | signal transduction        | 1.2         | -14.5       | 6.4         | -1.4        | -1.5        | -7.3        | -1.9        |
| U33052        |          | lipid-activated, protein kinase PRK2                          | 199_s_at                | 7165        | signal transduction        | -1.1        | 1.0         | 3.3         | 1.5         | 1.1         | 1.1         | 1.2         |
| L05624        | A        | MAP kinase kinase, complete cds                               | 1844_s_at               | 7165        | signal transduction        | 1.7         | 1.6         | 1.1         | 2.7         | 2.5         | 2.2         | 3.7         |
| U43784        |          | mitogen activated protein kinase activated protein            | 1991_s_at               | 7165        | signal transduction        | -1.1        | 1.3         | -1.3        | -2.5        | -1.3        | -1.4        | -1.2        |
| L26318        |          | protein kinase (JNK1)                                         | 2070_i_at               | 7165        | signal transduction        | 1.0         | -2.2        | 12.3        | -1.5        | -1.8        | 1.1         | 57.2        |
| U81802        | B        | PtdIns 4-kinase (PI4Kb)                                       | 146_at                  | 7165        | signal transduction        | 1.5         | 1.0         | 1.1         | -1.1        | -1.6        | -2.8        | -1.5        |
| L36645        |          | receptor protein-tyrosine kinase                              | 1606_at                 | 7165        | signal transduction        | -2.3        | 1.0         | 1.2         | -1.2        | -2.5        | -8.6        | -6.3        |
| M97815        |          | retinoic acid-binding protein II                              | 1057_at                 | 7165        | signal transduction        | -1.2        | -1.1        | 1.0         | -1.2        | -1.4        | -4.3        | -2.9        |
| D17517        |          | Sky                                                           | 2086_s_at               | 7165        | signal transduction        | 1.4         | 1.2         | -1.7        | -1.1        | 2.3         | 2.5         | 1.7         |
| <b>U37518</b> | <b>B</b> | <b>TNF-related apoptosis inducing ligand TRAIL</b>            | <b>1715_at</b>          | <b>7165</b> | <b>signal transduction</b> | <b>-1.1</b> | <b>-1.5</b> | <b>-1.1</b> | <b>-1.7</b> | <b>-2.5</b> | <b>-5.1</b> | <b>-7.2</b> |
| M27691        |          | transactivator protein (CREB)                                 | 37535_at                | 7165        | signal transduction        | 3.0         | 1.3         | -1.3        | 1.8         | -1.1        | -1.1        | 1.8         |
| M19154        |          | transmembrane growth factor-beta-2                            | 1262_s_at               | 7165        | signal transduction        | -1.8        | 1.0         | -1.4        | 1.4         | -1.1        | 1.2         | 2.7         |
| AF024710      | A        | vascular endothelial growth factor (VE)                       | 1953_at                 | 7165        | signal transduction        | 1.4         | -1.3        | 1.0         | 1.8         | 1.4         | 1.1         | 5.8         |
| U43142        |          | vascular endothelial growth factor related protein            | 159_at                  | 7165        | signal transduction        | 2.7         | -2.3        | -2.0        | 1.3         | 1.5         | 1.2         | 3.3         |
| U81787        | A        | Wnt10B                                                        | 1018_at                 | 7165        | signal transduction        | 1.1         | -1.3        | 2.4         | 1.6         | 2.7         | 1.3         | 1.2         |
| L36529        | A        | (clone N5-4) protein p84                                      | 40242_at                | 7165        | signal transduction        | -1.2        | 1.0         | 1.1         | 2.2         | 2.0         | 2.1         | 3.7         |
| AF022116      |          | 5-AMP-activated protein kinase beta-1                         | 35348_at                | 7165        | signal transduction        | 1.4         | 1.0         | -2.8        | -1.7        | -1.4        | -2.1        | 1.6         |
| U78575        | B        | 68 kDa type I phosphatidylinositol-4-phosphate 5-kinase alpha | 31833_at                | 7165        | signal transduction        | 1.4         | -1.5        | -1.4        | 1.2         | -1.9        | -3.1        | 1.2         |
| L11695        |          | activin receptor-like kinase (ALK-5)                          | 32903_at                | 7165        | signal transduction        | 2.8         | -5.4        | 1.2         | 1.0         | -1.2        | 2.8         | -1.4        |
| U02390        | B        | adenylyl cyclase-associated protein homolog CAP2 (CAP2)       | 33404_at                | 7165        | signal transduction        | -2.0        | 1.0         | -1.1        | -1.4        | -2.0        | 1.4         | -8.2        |
| L19872        |          | AH-receptor                                                   | 40516_at                | 7165        | signal transduction        | 1.4         | -1.8        | -1.2        | 1.9         | 1.3         | 1.4         | 3.2         |
| AF041474      |          | BAF53a                                                        | 41278_at                | 7165        | signal transduction        | 1.1         | 1.6         | -1.7        | 2.7         | 2.0         | 2.2         | 1.8         |
| U37139        | A        | beta 3-endonexin, long m and short m                          | 38501_s_at              | 7165        | signal transduction        | 1.0         | 1.1         | 1.1         | 1.7         | 1.5         | 3.1         | 3.1         |
| U29725        | B        | BMK1 alpha kinase                                             | 35617_at                | 7165        | signal transduction        | -1.1        | -1.3        | -1.2        | -1.9        | -1.7        | -2.9        | -1.4        |
| U66063        | B        | calcium/calmodulin-dependent protein kinase II                | 32104_i_at              | 7165        | signal transduction        | 1.2         | -1.4        | -1.8        | -1.9        | -2.7        | -3.2        | -2.7        |
| U65887        |          | CDP-diaclyglycerol synthase                                   | 40217_s_at              | 7165        | signal transduction        | 1.1         | 1.3         | -2.7        | 1.4         | 1.1         | -1.3        | 1.0         |
| U64197        | A        | chemokine exodus-1                                            | 40385_at                | 7165        | signal transduction        | 1.3         | 1.1         | 1.4         | 2.1         | -1.4        | 1.6         | 46.4        |
| U59913        |          | chromosome 5 Mad homolog Smad5                                | 39926_at                | 7165        | signal transduction        | 1.7         | 1.1         | -1.5        | 1.5         | -1.1        | 3.3         | 1.2         |
| AF053356      |          | chromosome 7q22                                               | 38831_f_at              | 7165        | signal transduction        | 1.1         | -1.7        | -1.2        | -3.0        | -1.4        | -1.1        | -1.9        |
| AF020043      | A        | chromosome-associated polypeptide (HCAP)                      | 34763_at                | 7165        | signal transduction        | 1.1         | 1.5         | -1.1        | 2.2         | 1.8         | 1.7         | 3.0         |
| U79291        |          | clone 23721 sequence                                          | 38443_at                | 7165        | signal transduction        | -1.3        | 1.5         | -2.1        | 1.7         | 1.7         | 2.5         | 1.0         |
| AF055008      | B        | clone 24720 epithelin 1 and 2                                 | 41189_at                | 7165        | signal transduction        | 1.4         | -1.2        | -1.3        | -2.5        | -2.0        | -3.1        | -2.1        |
| M62397        | B        | colorectal mutant cancer protein                              | 35561_at                | 7165        | signal transduction        | 2.0         | 1.6         | -1.1        | -1.2        | -1.4        | -2.3        | -2.7        |
| AF100780      | B        | connective tissue growth factor related protein WISP-2        | 35898_at                | 7165        | signal transduction        | -1.3        | -1.2        | -1.3        | -1.6        | -1.7        | -1.9        | -3.8        |
| X76104        | B        | DAP-kinase                                                    | 40049_at                | 7165        | signal transduction        | 1.2         | 1.5         | -1.2        | -2.0        | -1.2        | -1.4        | -2.6        |
| X64229        | A        | dek                                                           | 38992_at                | 7165        | signal transduction        | 1.0         | 1.1         | 1.3         | 1.8         | 2.0         | 2.6         | 3.1         |
| D86407        |          | DNA apoER2                                                    | 40012_at                | 7165        | signal transduction        | 14.0        | 1.0         | 1.5         | 3.9         | 2.9         | 2.6         | 4.6         |
| AF001862      | B        | FYN binding protein                                           | 41819_at                | 7165        | signal transduction        | -1.9        | 1.2         | -3.3        | -1.2        | -1.8        | -3.1        | -20.9       |
| M63904        | A        | G-alpha 16 protein                                            | 40365_at                | 7165        | signal transduction        | 1.2         | -1.2        | 1.0         | 1.0         | 1.5         | 1.5         | 2.8         |
| AF044311      | B        | gamma-synuclein gene                                          | 36555_at                | 7165        | signal transduction        | -1.9        | -1.2        | -2.4        | -1.3        | -1.7        | -2.9        | -2.4        |
| M60047        | A        | heparin binding protein (HbP17)                               | 38489_at                | 7165        | signal transduction        | 1.0         | -1.4        | 1.4         | 1.4         | 1.8         | 3.0         | 2.6         |
| M60278        | A        | heparin-binding EGF-like growth factor                        | 38037_at                | 7165        | signal transduction        | 1.3         | 1.5         | 2.7         | 1.8         | 2.3         | 2.8         | 33.8        |
| AB012853      | A        | ING1L ING1Lp                                                  | 39555_at                | 7165        | signal transduction        | 1.0         | 1.3         | 1.8         | 1.0         | 6.0         | 1.4         | 3.6         |
| U96922        |          | inositol polyphosphate 4-phosphatase type II-alpha            | 38168_at                | 7165        | signal transduction        | 1.6         | -1.5        | 1.7         | 2.9         | 1.9         | 1.5         | 1.3         |
| S82539        | A        | insulin receptor substrate-1                                  | 850_r_at                | 7165        | signal transduction        | -1.6        | 1.2         | -1.3        | 2.9         | 2.0         | 1.7         | 1.1         |
| S82539        |          | insulin receptor substrate-1                                  | 41049_at                | 7165        | signal transduction        | 1.9         | 8.3         | -1.7        | 11.2        | -3.2        | 1.0         | 6.6         |
| AF031187      |          | interleukin 15 precursor (IL-15)                              | 38488_s_at              | 7165        | signal transduction        | -2.9        | -1.6        | -1.5        | -3.8        | -5.8        | -7.0        | 1.3         |
| U22815        |          | LAR-interacting protein 1a                                    | 41781_at                | 7165        | signal transduction        | -1.1        | -1.1        | 1.4         | 1.9         | 1.5         | 2.7         | 1.0         |
| AF061258      | A        | LIM protein                                                   | 40060_r_at              | 7165        | signal transduction        | -1.1        | 1.3         | 1.6         | 1.6         | 2.0         | 1.3         | 4.8         |
| L13210        | B        | Mac-2 binding protein                                         | 37754_at                | 7165        | signal transduction        | 1.2         | -1.3        | -1.4        | -2.3        | 1.9         | -1.9        | -2.9        |
| L36870        |          | MAP kinase kinase 4 (MKK4)                                    | 1845_at                 | 7165        | signal transduction        | 1.0         | 1.5         | -1.4        | 1.4         | 2.0         | 2.6         | -2.0        |
| U77604        | B        | microsomal glutathione S-transferase 2                        | 820_at                  | 7165        | signal transduction        | -1.2        | 1.4         | -1.6        | -1.1        | -1.1        | -1.3        | -2.5        |
| AF026977      |          | microsomal glutathione S-transferase 3 (MGST3)                | 39018_at                | 7165        | signal transduction        | 1.3         | 1.4         | 2.6         | 1.1         | 1.0         | -1.2        | -1.7        |
| U97105        |          | N2A3                                                          | 40607_at                | 7165        | signal transduction        | 1.1         | 1.2         | -1.7        | 1.3         | 2.2         | 2.9         | 1.7         |
| M18728        | A        | nonspecific crossreacting antigen                             | 36105_at                | 7165        | signal transduction        | -2.7        | -1.3        | -1.2        | 1.3         | 3.6         | 1.9         | 4.0         |
| M64925        |          | palmitoylated erythrocyte membrane protein (MPP1)             | 32207_at                | 7165        | signal transduction        | 1.0         | 1.7         | 1.8         | -1.1        | -1.5        | -3.1        | -1.6        |
| U26455        |          | phosphatidylinositol 3-kinase homolog (ATM)                   | 2000_at                 | 7165        | signal transduction        | 1.5         | 1.3         | 1.0         | 1.6         | -1.5        | -2.5        | 1.4         |
| U18934        |          | receptor tyrosine kinase (DTK)                                | 35246_at                | 7165        | signal transduction        | 1.2         | 1.3         | -1.5        | -1.2        | 2.3         | 2.9         | 1.6         |
| M97815        | B        | retinoic acid-binding protein II (CRABP-II)                   | 41783_at                | 7165        | signal transduction        | -1.7        | -1.3        | 1.0         | -1.7        | -2.7        | -3.5        | -3.0        |
| AF045458      | B        | serine/threonine kinase ULK1 (ULK1)                           | 34827_at                | 7165        | signal transduction        | 1.1         | -1.3        | -1.6        | -3.2        | -3.4        | -2.4        | -1.9        |
| AF039843      | A        | Sprouty 2 (SPRY2)                                             | 33700_at                | 7165        | signal transduction        | 1.3         | 1.3         | 3.1         | 4.5         | 3.0         | 6.0         | 8.3         |
| AF022375      | A        | vascular endothelial growth factor                            | 36100_at                | 7165        | signal transduction        | 1.0         | -1.1        | 1.4         | 1.8         | 1.4         | 1.9         | 4.9         |
| M63978        | A        | vascular endothelial growth factor gene                       | 36101_s_at              | 7165        | signal transduction        | 2.5         | -1.9        | 2.8         | 2.0         | 2.2         | 1.2         | 18.5        |
| W27953        |          | 39n7 cDNA                                                     | 31502_at                | 7165        | signal transduction        | 1.5         | 1.6         | 2.3         | -1.2        | -1.7        | -3.6        | -2.6        |
| Z18859        | B        | cone transducin alpha subunit                                 | 34571_at                | 7165        | signal transduction        | 1.6         | 1.4         | -1.5        | -1.3        | -1.2        | -2.6        | 1.0         |
| AL031781      | A        | dJ51J12.1 ortholog of zebrafish Quaking protein homolog ZKG-1 | 39760_at                | 7165        | signal transduction        | 1.0         | -1.1        | -3.2        | 1.5         | 1.1         | 1.5         | 2.5         |
| AL031781      | A        | J51J12.1.3 ortholog of mouse KH Domain RNA Binding protein    | 39759_at                | 7165        | signal transduction        | 1.3         | 1.2         | 1.7         | 2.1         | 2.5         | 4.4         | 5.9         |
| AL049969      | A        | DKFZp564A072                                                  | 37366_at                | 7165        | signal transduction        | 1.4         | 1.0         | 1.0         | 1.4         | 1.8         | 1.7         | 2.7         |
| AL049370      | B        | DKFZp566D0918                                                 | 41856_at                | 7165        | signal transduction        | 1.2         | -1.2        | -1.1        | -1.5        | -1.8        | -3.2        | -1.6        |

| GenBank | Accession # | Group | Affymetric Gene Annotation                                     | Affymetric Probe set id | GO id | GO Biological Process                                                             | 0    | 4    | 6    | 8    | 12   | 16    | 20   | 24 |
|---------|-------------|-------|----------------------------------------------------------------|-------------------------|-------|-----------------------------------------------------------------------------------|------|------|------|------|------|-------|------|----|
|         | S62539      |       | insulin receptor substrate-1                                   | 851_s_at                | 7165  | signal transduction                                                               | -1.3 | 1.6  | 2.7  | 2.3  | 2.0  | -1.1  |      |    |
|         | AA902713    | B     | ok7111.s1 cDNA                                                 | 39388_at                | 7165  | signal transduction                                                               | 1.0  | -1.4 | -1.9 | -1.6 | -2.8 | -2.1  | -4.6 |    |
|         | S59184      | A     | related to receptor tyrosine kinase                            | 37756_at                | 7165  | signal transduction                                                               | -1.9 | 1.2  | 1.3  | 3.1  | 1.9  | 1.7   | 1.3  |    |
|         | S59184      |       | RYK-related to receptor tyrosine kinase                        | 539_at                  | 7165  | signal transduction                                                               | -1.1 | 1.4  | 2.3  | 1.2  | -1.9 | -3.4  | 1.1  |    |
|         | X12830      |       | interleukin-6 (IL-6) receptor                                  | 160032_at               | 7166  | cell surface receptor linked signal transduction                                  | -1.2 | -1.5 | -2.6 | -1.2 | 1.0  | -1.2  | 1.2  |    |
|         | X05908      | A     | lipocortin                                                     | 37403_at                | 7166  | cell surface receptor linked signal transduction                                  | -1.2 | -1.2 | 1.3  | 1.3  | 1.0  | 1.4   | 2.8  |    |
|         | Y09392      |       | WLS-LR, WLS-S1 and WLS-S2 proteins                             | 41189_at                | 7166  | cell surface receptor linked signal transduction                                  | -2.0 | -1.6 | -2.8 | 1.1  | 1.2  | 2.9   | 1.4  |    |
|         | L42243      |       | (clone 51H8) alternatively splice                              | 1598_at                 | 7166  | cell surface receptor linked signal transduction                                  | 1.2  | -1.3 | -5.5 | -1.3 | -1.3 | 1.3   | 1.7  |    |
|         | U05875      | A     | clone pSK1 interferon gamma receptor accessory factor-1 (AF-1) | 13140_at                | 7166  | cell surface receptor linked signal transduction                                  | -1.1 | 1.1  | 1.7  | 1.9  | 1.7  | 2.2   | 3.4  |    |
|         | M27492      | B     | interleukin 1 receptor                                         | 1368_at                 | 7166  | cell surface receptor linked signal transduction                                  | -1.1 | 1.8  | -1.2 | 1.4  | -1.9 | -3.1  | -3.3 |    |
|         | U25897      |       | stanniocalcin precursor (STC)                                  | 41354_at                | 7166  | cell surface receptor linked signal transduction                                  | -4.2 | -2.5 | -2.1 | -1.2 | 2.7  | 2.5   | 2.1  |    |
|         | AF098462    | A     | stanniocalcin-related protein                                  | 32043_at                | 7166  | cell surface receptor linked signal transduction                                  | -1.2 | 1.0  | 1.3  | 2.2  | 2.0  | 1.5   | 9.9  |    |
|         | AW026535    |       | wv14f10.x1 cDNA                                                | 33830_at                | 7166  | cell surface receptor linked signal transduction                                  | -2.7 | 1.2  | -1.3 | 2.4  | 1.2  | -1.3  | -1.8 |    |
|         | X03663      |       | c-fms proto-oncogene                                           | 160022_at               | 7169  | transmembrane receptor protein tyrosine kinase signaling pathway                  | -1.5 | -2.1 | -1.3 | -1.5 | -2.0 | -10.7 | -1.2 |    |
|         | D83492      | B     | Eph-family protein                                             | 39930_at                | 7169  | transmembrane receptor protein tyrosine kinase signaling pathway                  | -1.1 | -1.6 | -1.1 | -1.9 | -2.2 | -5.3  | -2.4 |    |
|         | AF035121    |       | KDR/rlk-1 protein                                              | 1954_at                 | 7169  | transmembrane receptor protein tyrosine kinase signaling pathway                  | 1.4  | -1.7 | 1.0  | -1.1 | -4.3 | -3.6  | -2.9 |    |
|         | L36645      |       | receptor protein-tyrosine kinase                               | 1606_at                 | 7169  | transmembrane receptor protein tyrosine kinase signaling pathway                  | -2.3 | 1.0  | 1.2  | -1.2 | -2.5 | -8.6  | -6.3 |    |
|         | M97675      |       | transmembrane receptor (ror1)                                  | 213_at                  | 7169  | transmembrane receptor protein tyrosine kinase signaling pathway                  | 1.0  | -1.2 | 2.3  | -1.1 | -1.5 | -1.9  | -2.8 |    |
|         | M34309      | B     | epidermal growth factor receptor (HER3)                        | 1585_at                 | 7169  | transmembrane receptor protein tyrosine kinase signaling pathway                  | 1.0  | -1.6 | -1.4 | -2.3 | -1.7 | -5.1  | -1.5 |    |
|         | M34309      | B     | epidermal growth factor receptor (HER3)                        | 32787_at                | 7169  | transmembrane receptor protein tyrosine kinase signaling pathway                  | 1.1  | -1.3 | -3.2 | -2.0 | -1.7 | -2.3  | -2.3 |    |
|         | D30783      | A     | epiregulin                                                     | 34476_r_at              | 7173  | EGF receptor signaling pathway                                                    | -1.8 | 2.1  | 5.3  | 13.1 | 11.1 | 3.2   | 13.5 |    |
|         | U12535      | A     | epidermal growth factor receptor kinase substrate              | 1467_at                 | 7173  | EGF receptor signaling pathway                                                    | -1.3 | -1.3 | 1.1  | 2.1  | 1.9  | 3.0   | 4.3  |    |
|         | U59913      |       | chromosome 5 Mad homolog Smd5                                  | 1013_at                 | 7179  | TGFbeta receptor signaling pathway                                                | -1.4 | 1.5  | 1.2  | 2.4  | -1.1 | 3.3   | 1.4  |    |
|         | AF010193    |       | MAD-related gene SMAD7 (SMAD7)                                 | 1857_at                 | 7179  | TGFbeta receptor signaling pathway                                                | 1.2  | -2.0 | 1.2  | 1.1  | -1.1 | -1.1  | 3.7  |    |
|         | M38449      | B     | transforming growth factor-beta, complete                      | 1830_s_at               | 7179  | TGFbeta receptor signaling pathway                                                | 1.2  | -1.6 | 1.2  | -4.9 | -1.5 | -2.9  | -1.1 |    |
|         | U59913      |       | chromosome 5 Mad homolog Smd5                                  | 39826_at                | 7179  | TGFbeta receptor signaling pathway                                                | 1.7  | 1.1  | -1.5 | 1.5  | -1.1 | 3.3   | 1.2  |    |
|         | L11695      |       | activin receptor-like kinase (ALK-5)                           | 32803_at                | 7181  | TGFbeta receptor complex assembly                                                 | 2.8  | -5.4 | 1.2  | 1.0  | -1.2 | 2.8   | -1.4 |    |
|         | AL049338    |       | DKF Zp564P116                                                  | 33910_at                | 7185  | transmembrane receptor protein tyrosine phosphatase signaling path                | 6.1  | 14.4 | -1.1 | 5.7  | 1.3  | 17.2  | 3.6  |    |
|         | X68487      | A     | A2b adenosine receptor                                         | 36324_at                | 7186  | G-protein coupled receptor protein signaling pathway                              | 1.7  | -1.2 | 1.4  | 2.8  | 1.9  | 1.9   | 2.0  |    |
|         | X80818      |       | metabotropic glutamate receptor type 4                         | 35485_at                | 7186  | G-protein coupled receptor protein signaling pathway                              | 1.1  | -1.1 | 1.6  | 1.1  | 1.1  | -2.6  | -1.7 |    |
|         | L06797      | B     | (clone L5) orphan G protein-coupled receptor                   | 649_s_at                | 7186  | G-protein coupled receptor protein signaling pathway                              | 1.5  | 1.2  | -1.4 | -1.8 | -1.2 | -1.4  | -2.6 |    |
|         | M27543      |       | guanine nucleotide-binding protein (Gi)                        | 876_at                  | 7186  | G-protein coupled receptor protein signaling pathway                              | -1.2 | 1.9  | -2.7 | 3.6  | 2.6  | 1.0   | 1.0  |    |
|         | U19487      | B     | prostaglandin E2 receptor                                      | 828_at                  | 7186  | G-protein coupled receptor protein signaling pathway                              | -1.1 | 1.3  | -2.0 | -1.3 | -1.3 | -1.9  | -2.9 |    |
|         | U64871      |       | putative G-protein-coupled receptor (GPR19)                    | 156_s_at                | 7186  | G-protein coupled receptor protein signaling pathway                              | 1.1  | 2.6  | 1.1  | 1.3  | -1.1 | -2.2  | 1.6  |    |
|         | U94888      |       | CC-chemokine receptor 10 (CCR10)                               | 32484_at                | 7186  | G-protein coupled receptor protein signaling pathway                              | -2.3 | -2.6 | -1.5 | -1.4 | 1.2  | -2.4  | -3.2 |    |
|         | U20980      | A     | chromatin assembly factor-1 p60 subunit                        | 36912_at                | 7186  | G-protein coupled receptor protein signaling pathway                              | 3.2  | -1.1 | 1.2  | -2.2 | 9.3  | 5.6   | 3.6  |    |
|         | AF053356    |       | chromosome 7q22                                                | 38831_f_at              | 7186  | G-protein coupled receptor protein signaling pathway                              | 1.1  | -1.7 | -1.2 | -3.0 | -1.4 | -1.1  | -1.9 |    |
|         | M57729      |       | complement component C5                                        | 37816_at                | 7186  | G-protein coupled receptor protein signaling pathway                              | 1.3  | 2.4  | -6.0 | -1.5 | -2.5 | -6.8  | 10.7 |    |
|         | M36820      | A     | cytokine (GRO-beta)                                            | 37187_at                | 7186  | G-protein coupled receptor protein signaling pathway                              | 1.5  | -1.4 | 1.9  | 1.7  | 1.5  | 1.4   | 3.9  |    |
|         | AF015257    |       | flow-induced endothelial G protein-coupled receptor            | 37447_at                | 7186  | G-protein coupled receptor protein signaling pathway                              | 1.5  | 1.5  | -2.7 | -1.1 | 1.3  | -2.0  | -1.3 |    |
|         | L37882      | B     | frizzled gene product                                          | 36799_at                | 7186  | G-protein coupled receptor protein signaling pathway                              | 1.6  | -1.6 | 1.0  | -3.2 | 2.7  | -5.3  | -3.6 |    |
|         | U13696      | B     | G-protein-coupled receptor (GPR1)                              | 33882_at                | 7186  | G-protein coupled receptor protein signaling pathway                              | 1.1  | 1.5  | -1.4 | -2.1 | -2.5 | -1.7  | -4.4 |    |
|         | M63904      | A     | G-alpha 16 protein                                             | 40365_at                | 7186  | G-protein coupled receptor protein signaling pathway                              | 1.2  | 1.0  | 1.0  | 1.0  | 1.5  | 1.5   | 2.8  |    |
|         | U67058      | A     | proteinase activated receptor-2                                | 38247_at                | 7186  | G-protein coupled receptor protein signaling pathway                              | 1.0  | 1.3  | 1.0  | 1.3  | 1.0  | 1.0   | 2.5  |    |
|         | U43318      | A     | putative transmembrane receptor (frizzled 5)                   | 34997_r_at              | 7186  | G-protein coupled receptor protein signaling pathway                              | -1.9 | -1.8 | 1.5  | -2.6 | -1.2 | 1.4   | 1.2  |    |
|         | Z18859      | B     | cone transducin alpha subunit                                  | 34571_at                | 7186  | G-protein coupled receptor protein signaling pathway                              | 1.6  | 1.4  | -1.5 | -1.3 | -1.2 | -2.6  | 1.0  |    |
|         | L41147      |       | 5-HT6 serotonin receptor                                       | 32907_at                | 7187  | G-protein signaling, coupled to cyclic nucleotide second messenger                | -1.9 | 1.1  | 2.8  | -2.1 | 2.0  | 2.5   | -1.7 |    |
|         | X68487      | A     | A2b adenosine receptor                                         | 36324_at                | 7190  | adenylyl cyclase activation                                                       | 1.7  | -1.2 | 1.4  | 2.8  | 1.9  | 1.9   | 2.0  |    |
|         | U02390      | B     | adenylyl cyclase-associated protein homolog CAP2 (CAP2)        | 33404_at                | 7190  | adenylyl cyclase activation                                                       | -2.0 | 1.0  | -1.1 | -1.4 | -2.0 | 1.4   | -8.2 |    |
|         | AF013252    |       | preprocorinistatin (Cort), complete cds (85,40                 | 36016_at                | 7193  | G-protein signaling, adenylyl cyclase inhibiting pathway                          | -1.7 | 2.0  | 1.5  | -1.1 | -2.5 | 1.2   | 2.5  |    |
|         | X80818      |       | metabotropic glutamate receptor type 4                         | 35485_at                | 7194  | negative regulation of adenylyl cyclase activity                                  | 1.1  | -1.1 | 1.6  | 1.1  | 1.1  | -2.6  | -1.7 |    |
|         | M27543      |       | guanine nucleotide-binding protein (Gi)                        | 876_at                  | 7194  | negative regulation of adenylyl cyclase activity                                  | -1.2 | 1.9  | -2.7 | 3.6  | 2.6  | 1.0   | 1.0  |    |
|         | Z34897      | A     | H1 histamine receptor                                          | 35384_at                | 7200  | G-protein signaling, coupled to IP3 second messenger (phospholipase C activation) | -1.6 | -1.8 | 3.6  | 1.0  | 4.6  | 1.8   | 2.8  |    |
|         | M63904      | A     | G-alpha 16 protein                                             | 40365_at                | 7202  | phospholipase C activation                                                        | 1.2  | -1.2 | 1.0  | 1.0  | 1.5  | 1.5   | 2.8  |    |
|         | L06797      | B     | (clone L5) orphan G protein-coupled receptor                   | 649_s_at                | 7204  | cytosolic calcium ion concentration elevation                                     | 1.5  | 1.2  | -1.4 | -1.8 | -1.2 | -1.4  | -2.6 |    |
|         | U67058      | A     | proteinase activated receptor-2                                | 38247_at                | 7204  | cytosolic calcium ion concentration elevation                                     | 1.0  | 1.3  | 1.0  | 1.3  | 1.0  | 1.0   | 2.5  |    |
|         | M63904      | A     | G-alpha 16 protein                                             | 40365_at                | 7207  | muscarinic acetyl choline receptor, phospholipase C activating pathway            | 1.2  | -1.2 | 1.0  | 1.0  | 1.5  | 1.5   | 2.8  |    |
|         | X51405      |       | carboxypeptidase E (EC 3.4.17.10)                              | 36606_at                | 7218  | neuropeptide signaling pathway                                                    | 1.2  | 1.2  | -2.6 | 1.8  | -1.2 | -2.6  | -1.9 |    |
|         | D86962      | A     | KIAA0207                                                       | 37615_at                | 7218  | neuropeptide signaling pathway                                                    | 1.1  | 1.8  | -1.4 | 1.2  | 1.3  | 1.2   | 2.9  |    |
|         | Y00757      |       | polypeptide TB2                                                | 34265_at                | 7218  | neuropeptide signaling pathway                                                    | -1.7 | -1.2 | 1.4  | 1.4  | 1.1  | 1.6   | 9.7  |    |
|         | U81787      | A     | Wnt10B                                                         | 1018_at                 | 7223  | frizzled-2 signaling pathway                                                      | 1.1  | -1.3 | 2.4  | 1.6  | 2.7  | 1.3   | 1.2  |    |
|         | Z71621      |       | Wnt-13                                                         | 33684_at                | 7223  | frizzled-2 signaling pathway                                                      | 1.2  | 1.0  | 2.7  | 1.2  | -1.9 | 4.2   | 1.2  |    |
|         | X53587      | A     | integrin beta 4                                                | 406_at                  | 7229  | integrin-mediated signaling pathway                                               | 1.2  | -1.4 | 1.2  | -1.6 | 1.3  | 1.3   | 4.2  |    |
|         | X06256      | A     | integrin alpha 5 subunit                                       | 39753_at                | 7229  | integrin-mediated signaling pathway                                               | -1.2 | -1.2 | -2.6 | 1.3  | 1.8  | 1.6   | 3.7  |    |
|         | X17033      | A     | integrin alpha-2 subunit                                       | 1978_at                 | 7229  | integrin-mediated signaling pathway                                               | 1.4  | -1.4 | 2.1  | 3.4  | 4.4  | 5.0   | 7.1  |    |
|         | X53002      | A     | integrin beta-5 subunit                                        | 39754_at                | 7229  | integrin-mediated signaling pathway                                               | 1.0  | 1.2  | 1.1  | 1.9  | 4.0  | 7.1   | 4.6  |    |
|         | X68742      | A     | integrin, alpha subunit                                        | 120_at                  | 7229  | integrin-mediated signaling pathway                                               | 1.0  | 1.6  | 1.8  | -1.2 | 1.3  | 3.3   | 2.8  |    |
|         | M35011      | A     | integrin beta-5 subunit                                        | 2058_s_at               | 7229  | integrin-mediated signaling pathway                                               | 1.0  | 1.0  | 1.3  | 1.1  | 2.2  | 3.2   | 3.5  |    |
|         | M59911      |       | integrin alpha-3 chain                                         | 885_g_at                | 7229  | integrin-mediated signaling pathway                                               | 1.2  | -1.7 | -1.7 | -1.5 | 1.1  | 1.3   | 6.5  |    |
|         | M59911      | A     | integrin alpha-3 chain                                         | 884_at                  | 7229  | integrin-mediated signaling pathway                                               | 1.2  | -1.4 | 1.0  | -1.2 | 1.5  | 1.3   | 3.4  |    |
|         | M73780      |       | integrin beta-8 subunit                                        | 889_at                  | 7229  | integrin-mediated signaling pathway                                               | -1.2 | 1.7  | -4.3 | 3.2  | -1.3 | -1.2  | 1.1  |    |
|         | S66213      | A     | integrin alpha 6B                                              | 33410_at                | 7229  | integrin-mediated signaling pathway                                               | 1.3  | -1.1 | 1.7  | 1.9  | 1.8  | 2.5   | 3.7  |    |
|         | S66213      | B     | integrin alpha 6B                                              | 33411_g_at              | 7229  | integrin-mediated signaling pathway                                               | 1.6  | -1.1 | -1.5 | 2.5  | 2.2  | 2.4   | 3.1  |    |
|         | D42108      |       | phospholipase C                                                | 1182_at                 | 7242  | intracellular signaling cascade                                                   | 6.8  | -1.2 | -1.2 | -2.2 | 1.2  | -2.5  | 1.0  |    |
|         | X06318      |       | protein kinase C (PKC) type beta I                             | 13396_s_at              | 7242  | intracellular signaling cascade                                                   | -1.9 | -2.6 | -1.1 | 1.6  | -2.5 | -1.1  | 1.7  |    |
|         | X93510      | B     | 37 KDa LIM domain protein                                      | 32610_at                | 7242  | intracellular signaling cascade                                                   | 1.3  | -1.4 | -1.4 | -2.2 | -2.2 | -3.3  | -2.3 |    |
|         | AB006988    |       | CIS4                                                           | 39959_at                | 7242  | intracellular signaling cascade                                                   | 1.6  | 1.4  | 2.2  | 9.5  | 1.2  | -1.1  | 1.6  |    |
|         | D25538      | A     | KIAA0037                                                       | 40585_at                | 7242  | intracellular signaling cascade                                                   | 1.3  | 1.0  | -1.1 | 1.1  | 2.1  | 1.5   | 2.8  |    |
|         | D86962      | A     | KIAA0207                                                       | 37615_at                | 7242  | intracellular signaling cascade                                                   | 1.1  | 1.8  | -1.4 | 1.2  | 1.3  | 1.2   | 2.9  |    |



| GenBank       | Group    | Affymetric Gene Annotation                                                   | Affymetric Probe set id | GO id       | GO Biological Process                     | 0           | 4           | 6           | 8           | 12          | 16          | 24          |
|---------------|----------|------------------------------------------------------------------------------|-------------------------|-------------|-------------------------------------------|-------------|-------------|-------------|-------------|-------------|-------------|-------------|
| AB002298      | B        | KIAA0300                                                                     | 40834_at                | 7242        | intracellular signaling cascade           | 1.4         | 1.2         | -1.5        | -1.6        | -1.4        | -1.6        | -2.8        |
| AB002367      |          | KIAA0369                                                                     | 38957_at                | 7242        | intracellular signaling cascade           | -1.5        | 1.1         | -1.7        | 2.0         | -1.2        | -4.1        | -3.0        |
| AB014551      | A        | KIAA0651                                                                     | 40099_at                | 7242        | intracellular signaling cascade           | 1.3         | -1.8        | 2.1         | 1.4         | 2.2         | 1.7         | 6.6         |
| AB023166      |          | KIAA0949                                                                     | 32081_at                | 7242        | intracellular signaling cascade           | 1.2         | 9.3         | -1.5        | -4.0        | 6.1         | 12.3        | 2.7         |
| AB028998      |          | KIAA1075                                                                     | 35358_at                | 7242        | intracellular signaling cascade           | 3.8         | -1.3        | 4.7         | -1.5        | -3.7        | 1.4         | 4.6         |
| X51408        |          | n-chimaerin                                                                  | 40512_at                | 7242        | intracellular signaling cascade           | -1.4        | 1.3         | 1.6         | -1.5        | -1.2        | -4.3        | -2.3        |
| D88532        | B        | p55plik                                                                      | 322_at                  | 7242        | intracellular signaling cascade           | 1.6         | -1.1        | 1.3         | 1.2         | -1.9        | -4.7        | -1.9        |
| D88532        |          | p55plik_complete cds                                                         | 34479_at                | 7242        | intracellular signaling cascade           | 3.0         | 2.0         | 3.7         | -2.1        | -2.0        | -2.6        | -3.9        |
| AJ001306      |          | PDZ domain protein                                                           | 38145_at                | 7242        | intracellular signaling cascade           | -1.3        | -2.8        | -2.5        | 1.6         | -1.6        | -7.4        | -2.2        |
| Y11312        | B        | phosphoinositide 3-kinase                                                    | 41715_at                | 7242        | intracellular signaling cascade           | 1.5         | 1.2         | -2.0        | -2.8        | -3.0        | -3.6        | -9.6        |
| D10495        | B        | protein kinase C delta-type                                                  | 1810_s_at               | 7242        | intracellular signaling cascade           | 1.2         | 1.3         | -1.2        | -1.6        | -2.0        | -2.6        | -1.7        |
| U38545        |          | ARF-activated phosphatidylcholine-specific phosphatase                       | 177_at                  | 7242        | intracellular signaling cascade           | -1.1        | -1.4        | 1.3         | -1.6        | -3.5        | -2.4        | -2.0        |
| M15990        | A        | c-yes-1                                                                      | 1674_at                 | 7242        | intracellular signaling cascade           | -1.8        | 1.1         | -1.3        | 2.2         | 1.7         | 2.5         | 1.5         |
| M64174        | B        | protein-tyrosine kinase (JAK1)                                               | 1457_at                 | 7242        | intracellular signaling cascade           | 1.4         | 1.5         | 1.1         | -1.7        | -1.7        | -3.4        | -1.9        |
| U48730        |          | transcription factor Stat5b (stat5b)                                         | 472_at                  | 7242        | intracellular signaling cascade           | -1.1        | 1.7         | -1.8        | -3.3        | -1.7        | -1.2        | -1.5        |
| L36818        | B        | (clone 51C-3) 51C protein                                                    | 36598_s_at              | 7242        | intracellular signaling cascade           | 1.2         | -1.1        | -1.4        | -2.2        | -2.3        | -3.1        | -1.6        |
| AF036927      | B        | adenylyl cyclase type IX                                                     | 33800_at                | 7242        | intracellular signaling cascade           | 1.1         | 1.0         | 1.2         | -1.8        | -1.2        | -1.8        | -3.7        |
| X83543        | B        | APXL                                                                         | 39283_at                | 7242        | intracellular signaling cascade           | 1.4         | -1.1        | -1.5        | 1.1         | 1.0         | -2.0        | -2.7        |
| AF068180      | B        | B cell linker protein BLNK, alternatively spliced, beta2-syntrophin (SNT B2) | 38242_at                | 7242        | intracellular signaling cascade           | -1.2        | 2.3         | 1.3         | -1.1        | -2.5        | -2.2        | -5.9        |
| U40572        | B        |                                                                              | 40589_at                | 7242        | intracellular signaling cascade           | 1.3         | 1.1         | -2.3        | -2.1        | -2.3        | -1.7        | -3.4        |
| M95712        |          | B-raf                                                                        | 1654_at                 | 7242        | intracellular signaling cascade           | -1.2        | 1.2         | -2.9        | -2.0        | -1.5        | 1.3         | -1.2        |
| AC005954      | B        | chromosome 19, cosmid R28784                                                 | 35148_at                | 7242        | intracellular signaling cascade           | -1.2        | -1.5        | -3.0        | -1.4        | -1.6        | -2.1        | -2.3        |
| AF007156      |          | clone 23617 unknown                                                          | 38162_at                | 7242        | intracellular signaling cascade           | -1.5        | 6.0         | 2.0         | -1.7        | 3.8         | -2.6        | -1.3        |
| U79291        |          | clone 23721 sequence                                                         | 38443_at                | 7242        | intracellular signaling cascade           | -1.3        | 1.5         | -2.1        | 1.7         | 1.7         | 2.5         | 1.0         |
| U90907        | B        | clone 23907                                                                  | 37961_at                | 7242        | intracellular signaling cascade           | 1.5         | -1.2        | -1.6        | -1.5        | -2.3        | -3.7        | -4.4        |
| U72066        | A        | CtBP interacting protein CtIP (CtIP)                                         | 40100_at                | 7242        | intracellular signaling cascade           | -1.1        | 1.0         | 2.4         | 2.2         | 1.3         | 2.0         | 2.9         |
| AF015926      | B        | ezrin-radixin-moesin binding phosphoprotein-50                               | 32174_at                | 7242        | intracellular signaling cascade           | 1.0         | -1.1        | 1.1         | -1.7        | -1.9        | -3.0        | -3.6        |
| M23379        | A        | GTPase-activating protein ras p21 (RASA)                                     | 1675_at                 | 7242        | intracellular signaling cascade           | -1.3        | 1.5         | 1.7         | 3.5         | 3.2         | 3.7         | 5.6         |
| M23379        | A        | GTPase-activating protein ras p21 (RASA)                                     | 36935_at                | 7242        | intracellular signaling cascade           | -1.2        | 1.2         | -1.5        | 2.3         | 2.4         | 2.5         | 3.6         |
| U72206        |          | guanine nucleotide regulatory factor (LFP40)                                 | 40101_q_at              | 7242        | intracellular signaling cascade           | -1.3        | 1.5         | 3.0         | -1.4        | 1.6         | 1.2         | 4.0         |
| U13896        |          | homolog of Drosophila discs large protein, isom 2 (hdlg-2) mR                | 40065_s_at              | 7242        | intracellular signaling cascade           | 1.0         | -1.2        | 1.5         | 1.2         | -3.4        | -1.6        | -1.5        |
| AF061268      | A        | LM protein                                                                   | 40060_r_at              | 7242        | intracellular signaling cascade           | 1.1         | 1.3         | 1.6         | 1.6         | 2.0         | 1.3         | 4.8         |
| M64925        |          | palmitoylated erythrocyte membrane protein (MPP1)                            | 32207_at                | 7242        | intracellular signaling cascade           | 1.0         | 1.7         | 1.8         | -1.1        | -1.5        | -3.1        | -1.6        |
| AF150247      | A        | cDNA (clone=CBFBCC09                                                         | 39957_at                | 7242        | intracellular signaling cascade           | -1.7        | 1.0         | 1.6         | 2.7         | 1.8         | 2.6         | 1.6         |
| AL049969      | A        | DKFZp564A072                                                                 | 37366_at                | 7242        | intracellular signaling cascade           | 1.4         | 1.0         | 1.0         | 1.4         | 1.8         | 1.7         | 2.7         |
| AL050148      | B        | DKFZp586G1520                                                                | 35645_at                | 7242        | intracellular signaling cascade           | -1.7        | -1.5        | -1.4        | -1.2        | -1.4        | -1.2        | -4.4        |
| AB011123      | B        | KIAA0551                                                                     | 32680_at                | 7243        | protein kinase cascade                    | -1.4        | 1.4         | -1.4        | -1.2        | -1.4        | -1.6        | -3.5        |
| AB014529      | A        | KIAA0629                                                                     | 34657_at                | 7243        | protein kinase cascade                    | -1.3        | 1.5         | -1.3        | 2.6         | 1.8         | 1.9         | 1.8         |
| AB014587      | A        | KIAA0687                                                                     | 35694_at                | 7243        | protein kinase cascade                    | 1.1         | 1.0         | -1.6        | 1.3         | 1.7         | 1.2         | 2.8         |
| AF001862      | B        | FYN binding protein                                                          | 41819_at                | 7243        | protein kinase cascade                    | -1.9        | 1.2         | -3.3        | -1.2        | -1.8        | -3.1        | -20.9       |
| X68487        | A        | A2b adenosine receptor                                                       | 36324_at                | 7254        | JNK cascade                               | 1.7         | -1.2        | 1.4         | 2.8         | 1.9         | 1.9         | 2.0         |
| L26318        |          | protein kinase (JNK1)                                                        | 2070_l_at               | 7254        | JNK cascade                               | 1.0         | -2.0        | 12.3        | -1.5        | -1.8        | 1.1         | 57.2        |
| U28963        | B        | Cps2 (GPS2)                                                                  | 35653_at                | 7254        | JNK cascade                               | 1.2         | -2.0        | -1.1        | -1.9        | -2.7        | -3.8        | -1.4        |
| L36870        |          | MAP kinase kinase 4 (MKK4)                                                   | 1845_at                 | 7254        | JNK cascade                               | 1.0         | 1.5         | -1.4        | 1.4         | 2.0         | 2.6         | 2.0         |
| U67156        | A        | mitogen-activated kinase kinase kinase 5 (MAPKKK5)                           | 1327_s_at               | 7257        | activation of JUNK                        | -1.8        | 1.8         | -1.2        | 2.9         | 2.3         | 2.1         | 1.6         |
| L42243        |          | (clone 51H8) alternatively splice                                            | 1588_at                 | 7259        | JAK-STAT cascade                          | 1.2         | -1.3        | -5.5        | -1.3        | 1.3         | 1.3         | 1.7         |
| U48730        |          | transcription factor Stat5b (stat5b)                                         | 472_at                  | 7259        | JAK-STAT cascade                          | -1.1        | 1.7         | -1.8        | -3.3        | -1.7        | -1.2        | -1.5        |
| M64347        | B        | novel growth factor receptor                                                 | 31805_at                | 7259        | JAK-STAT cascade                          | 1.1         | 1.0         | -1.2        | -1.6        | -2.0        | -1.5        | -3.2        |
| D87467        |          | KIAA0277                                                                     | 38062_at                | 7264        | small GTPase mediated signal transduction | -1.8        | 1.3         | -1.3        | 1.5         | 1.6         | 3.0         | 1.2         |
| Y07566        | B        | RIT protein                                                                  | 38331_at                | 7264        | small GTPase mediated signal transduction | 1.0         | -1.1        | 1.3         | 1.2         | -1.5        | -1.7        | -2.6        |
| U05227        | B        | Rar protein                                                                  | 555_at                  | 7264        | small GTPase mediated signal transduction | -1.2        | -1.1        | 1.0         | 1.1         | -1.3        | -1.6        | -5.3        |
| U57093        |          | small GTP-binding protein Rab27b                                             | 808_at                  | 7264        | small GTPase mediated signal transduction | -1.5        | 1.2         | 1.8         | 1.0         | 5.9         | 10.0        | 1.3         |
| U59877        | A        | low-Mr GTP-binding protein (RAB31)                                           | 33371_s_at              | 7264        | small GTPase mediated signal transduction | -1.5        | -1.1        | -1.1        | -1.2        | 1.6         | 1.5         | 7.7         |
| AI553878      |          | tn30a05.x1 cDNA                                                              | 41450_at                | 7264        | small GTPase mediated signal transduction | -1.1        | 1.1         | -1.1        | 1.9         | 1.5         | 2.8         | -1.2        |
| U38545        |          | ARF-activated phosphatidylcholine-specific phosphatase                       | 177_at                  | 7265        | RAS protein signal transduction           | -1.1        | -1.4        | 1.3         | -1.6        | -3.5        | -2.4        | -2.0        |
| U26914        |          | ras-responsive element binding protein (RREB-1)                              | 1714_at                 | 7265        | RAS protein signal transduction           | 1.1         | -1.1        | 3.6         | 1.2         | -1.3        | -1.7        | 1.0         |
| X69550        |          | rho GDP-dissociation inhibitor 1                                             | 40164_at                | 7266        | Rho protein signal transduction           | 1.3         | -2.0        | -1.6        | -2.5        | -2.0        | -2.2        | 1.4         |
| N36267        |          | Soares melanocyte ZNBM                                                       | 2029_at                 | 7266        | Rho protein signal transduction           | 1.1         | -1.3        | 4.1         | 1.7         | 1.1         | 1.2         | -1.4        |
| X58377        | A        | adipogenesis inhibitory factor                                               | 35464_at                | 7267        | cell-cell signaling                       | 1.0         | -10.1       | 1.0         | 1.7         | 4.8         | 2.0         | 12.8        |
| D14874        |          | adrenomedullin precursor                                                     | 34777_at                | 7267        | cell-cell signaling                       | -1.5        | 1.1         | -2.7        | -1.4        | -1.2        | -1.3        | -2.2        |
| D30783        | A        | epiregulin                                                                   | 34476_r_at              | 7267        | cell-cell signaling                       | -1.8        | 2.1         | 5.3         | 13.1        | 11.1        | 3.2         | 13.5        |
| D13633        | A        | KIAA0008                                                                     | 37231_at                | 7267        | cell-cell signaling                       | -1.7        | 1.3         | 5.5         | 3.2         | 4.9         | 3.2         | 18.3        |
| D8962         | A        | KIAA0207                                                                     | 37615_at                | 7267        | cell-cell signaling                       | 1.1         | 1.8         | -1.4        | 1.2         | 1.3         | 1.2         | 2.9         |
| X72308        |          | monocyte chemoattractant protein-3 (MCP-3)                                   | 39802_at                | 7267        | cell-cell signaling                       | -1.8        | -1.2        | -1.8        | -3.6        | -1.2        | -1.9        | 1.0         |
| X70340        | A        | transforming growth factor alpha                                             | 160025_at               | 7267        | cell-cell signaling                       | -1.4        | -1.4        | 1.6         | 3.9         | 3.7         | 4.5         | 8.5         |
| L37360        |          | (clone hEHK1-L) EHK1 receptor tyrosine kinase                                | 898_s_at                | 7267        | cell-cell signaling                       | 1.4         | 1.1         | 1.2         | 1.2         | 1.1         | -2.3        | -3.3        |
| J03779        | B        | common acute lymphoblastic leukemia antigen                                  | 1389_at                 | 7267        | cell-cell signaling                       | -1.1        | 1.2         | 1.2         | 1.1         | -2.0        | -2.5        | -3.2        |
| X17094        | A        | furin                                                                        | 35338_at                | 7267        | cell-cell signaling                       | 1.7         | 1.1         | 1.6         | 1.2         | 4.6         | 2.0         | 1.8         |
| M13755        | B        | interferon-induced 17-kDa/15-kDa protein                                     | 1107_s_at               | 7267        | cell-cell signaling                       | 1.5         | 1.2         | 1.0         | -1.8        | -1.9        | -2.9        | -1.4        |
| M60828        |          | keratinocyte growth factor , complete cds                                    | 1380_at                 | 7267        | cell-cell signaling                       | 1.2         | -14.5       | 6.4         | -1.4        | -1.5        | -7.3        | -1.9        |
| <b>U37518</b> | <b>B</b> | <b>TNF-related apoptosis inducing ligand TRAIL</b>                           | <b>1715_at</b>          | <b>7267</b> | <b>cell-cell signaling</b>                | <b>-1.1</b> | <b>-1.5</b> | <b>-1.1</b> | <b>-1.7</b> | <b>-2.5</b> | <b>-5.1</b> | <b>-7.2</b> |
| <b>M38449</b> | <b>B</b> | <b>transforming growth factor-beta , complete cds</b>                        | <b>1830_s_at</b>        | <b>7267</b> | <b>cell-cell signaling</b>                | <b>1.2</b>  | <b>-1.6</b> | <b>1.2</b>  | <b>-1.9</b> | <b>-1.5</b> | <b>-2.8</b> | <b>-1.1</b> |
| M19154        | B        | transmembrane growth factor-beta-2                                           | 1262_s_at               | 7267        | cell-cell signaling                       | -1.8        | 1.0         | -1.4        | 1.4         | -1.1        | 1.2         | 2.7         |
| U26726        | B        | 11-beta-hydroxysteroid dehydrogenase type 2                                  | 39697_at                | 7267        | cell-cell signaling                       | -1.2        | 1.0         | -1.7        | -2.3        | -3.4        | -11.3       | -7.1        |
| M30704        | A        | amphiregulin (AR)                                                            | 34898_at                | 7267        | cell-cell signaling                       | 1.0         | -1.3        | 2.3         | 1.5         | 2.3         | 3.9         | 11.0        |
| M67730        | B        | B61                                                                          | 40425_at                | 7267        | cell-cell signaling                       | 1.4         | 1.1         | -1.7        | -1.5        | -2.0        | -1.8        | -2.7        |
| M22489        |          | bone morphogenetic protein 2A (BMP-2A)                                       | 1113_at                 | 7267        | cell-cell signaling                       | -1.4        | -2.1        | -1.1        | -1.2        | 1.3         | -1.5        | 3.1         |
| M22489        |          | bone morphogenetic protein 2A (BMP-2A)                                       | 40367_at                | 7267        | cell-cell signaling                       | -1.2        | -1.9        | 1.0         | 1.1         | -1.1        | -1.5        | 2.5         |
| U64197        | A        | chemokine exodus-1                                                           | 40385_at                | 7267        | cell-cell signaling                       | 1.3         | 1.1         | 1.4         | 2.1         | -1.4        | 1.6         | 46.4        |

| GenBank       |          | Affymetrix                                             |                  | Fold Change |                              |             |             |             |             |             |             |             |
|---------------|----------|--------------------------------------------------------|------------------|-------------|------------------------------|-------------|-------------|-------------|-------------|-------------|-------------|-------------|
| Accession #   | Group    | Affymetric Gene Annotation                             | Probe set id     | GO id       | GO Biological Process        | 0           | 4           | 6           | 8           | 12          | 16          | 24          |
| AF056008      | B        | clone 24720 epithelin 1 and 2                          | 41198_at         | 7267        | cell-cell signaling          | 1.4         | -1.2        | -1.3        | -2.5        | -2.0        | -3.1        | -2.1        |
| AF100780      | B        | connective tissue growth factor related protein WISP-2 | 35898_at         | 7267        | cell-cell signaling          | -1.3        | -1.2        | -1.3        | -1.6        | -1.7        | -1.9        | -3.8        |
| M60047        | A        | heparin binding protein (HbP17)                        | 38489_at         | 7267        | cell-cell signaling          | 1.0         | -1.4        | 1.4         | 1.4         | 1.8         | 3.0         | 2.6         |
| AF031167      |          | interleukin 15 precursor (IL-15)                       | 38488_s_at       | 7267        | cell-cell signaling          | -2.9        | -1.6        | -1.5        | -3.8        | -5.8        | -7.0        | 1.3         |
| U81262        | A        | LERK5 (LERK5)                                          | 34334_at         | 7267        | cell-cell signaling          | 1.2         | -1.3        | 1.0         | 2.1         | 2.9         | 1.6         | 3.5         |
| U77604        | B        | microsomal glutathione S-transferase 2                 | 820_at           | 7267        | cell-cell signaling          | -1.2        | 1.4         | -1.6        | -1.1        | -1.1        | -1.3        | -2.5        |
| M18728        | A        | nonspecific crossreacting antigen                      | 36105_at         | 7267        | cell-cell signaling          | -2.7        | -1.3        | -1.2        | 1.3         | 3.6         | 1.9         | 4.0         |
| M24351        | A        | parathyroid hormone-like protein                       | 615_s_at         | 7267        | cell-cell signaling          | -1.5        | -2.0        | -1.2        | 2.6         | 3.9         | 2.8         | 6.1         |
| J03803        | A        | renal carcinoma parathyroid hormone-like peptide       | 37909_at         | 7267        | cell-cell signaling          | -1.1        | 1.6         | -1.9        | 1.4         | 9.1         | 1.1         | 12.8        |
| AF039843      | A        | Sprouty 2 (SPRY2)                                      | 33700_at         | 7275        | cell-cell signaling          | -1.3        | -1.3        | 3.1         | 4.5         | 3.0         | 6.0         | 8.3         |
| U25997        |          | stanniocalcin precursor (STC)                          | 41354_at         | 7267        | cell-cell signaling          | -4.2        | -2.5        | -2.1        | -1.2        | 2.7         | 2.5         | 2.1         |
| AF098462      | A        | stanniocalcin-related protein                          | 32043_at         | 7267        | cell-cell signaling          | -1.2        | 1.0         | 1.3         | 2.2         | 2.0         | 1.5         | 9.9         |
| M31682        | B        | testicular inhibin beta-B subunit                      | 38545_at         | 7267        | cell-cell signaling          | -1.3        | -1.1        | -1.2        | -1.2        | -1.6        | -2.0        | -3.7        |
| X64810        | B        | Homo Sapiens encoding PC1/PC3                          | 40849_at         | 7267        | cell-cell signaling          | 1.4         | 1.0         | -1.6        | -1.9        | -2.0        | -2.5        | -3.2        |
| AI765533      | A        | wi81c01.x1 cDNA                                        | 34335_at         | 7267        | cell-cell signaling          | -1.3        | 1.3         | 1.1         | 1.9         | 2.2         | 2.8         | 3.2         |
| D26443        | B        | glutamate transporter                                  | 36609_at         | 7268        | synaptic transmission        | 1.1         | -1.2        | 1.2         | 1.6         | -1.4        | -1.4        | -2.5        |
| X80818        |          | metabotropic glutamate receptor type 4                 | 35485_at         | 7268        | synaptic transmission        | 1.1         | -1.1        | 1.6         | 1.1         | 1.1         | -2.6        | -1.7        |
| L41147        |          | 5-HT6 serotonin receptor                               | 32907_at         | 7268        | synaptic transmission        | -1.9        | 1.1         | 2.8         | -2.1        | 2.0         | 2.5         | -1.7        |
| M81883        |          | glutamate decarboxylase (GAD67)                        | 37183_at         | 7268        | synaptic transmission        | 2.5         | 1.1         | 2.0         | 3.1         | -1.3        | -2.1        | 8.5         |
| <b>X79683</b> | <b>B</b> | <b>LAMB2 beta2 laminin</b>                             | <b>38812_at</b>  | <b>7268</b> | <b>synaptic transmission</b> | <b>-1.3</b> | <b>-1.1</b> | <b>-1.3</b> | <b>-2.1</b> | <b>-1.6</b> | <b>-2.5</b> | <b>-3.6</b> |
| U61849        |          | neuronal pentraxin 1 (NPTX1)                           | 37921_at         | 7268        | synaptic transmission        | -1.8        | 1.4         | 1.5         | 8.8         | 1.1         | -1.6        | -6.8        |
| AF013252      |          | preprocartistatin (Cort) , complete cds /cds=(85,40    | 36016_at         | 7268        | synaptic transmission        | -1.7        | 2.0         | 1.5         | -1.1        | -2.5        | 1.2         | 2.5         |
| W26407        | B        | 29b8 cDNA                                              | 33446_at         | 7268        | synaptic transmission        | -1.4        | 1.8         | -1.1        | 1.1         | -1.6        | -2.0        | -9.2        |
| X13293        |          | B-myb gene                                             | 1854_at          | 7275        | development                  | 2.2         | -1.3        | 1.0         | 1.1         | 3.1         | 1.3         | 2.6         |
| <b>X83697</b> | <b>A</b> | <b>integrin beta 4</b>                                 | <b>406_at</b>    | <b>7275</b> | <b>development</b>           | <b>-1.2</b> | <b>-1.4</b> | <b>1.2</b>  | <b>-1.8</b> | <b>1.3</b>  | <b>1.3</b>  | <b>4.2</b>  |
| X12830        |          | interleukin-6 (IL-6) receptor                          | 160032_at        | 7275        | development                  | -1.2        | -1.5        | -2.6        | -1.2        | 1.0         | -1.2        | 1.2         |
| X14787        |          | thrombospondin                                         | 115_at           | 7275        | development                  | 1.0         | -1.7        | -1.3        | 1.1         | 1.1         | 1.0         | 2.5         |
| X03663        |          | c-fms proto-oncogene                                   | 160022_at        | 7275        | development                  | -1.5        | -2.1        | -1.3        | -1.5        | -2.0        | -10.7       | -1.2        |
| X92518        | A        | HMG-C                                                  | 35200_at         | 7275        | development                  | -1.1        | 1.2         | 2.4         | 2.6         | 2.8         | 3.3         | 3.0         |
| D13891        | B        | Id-2H                                                  | 41215_s_at       | 7275        | development                  | -1.3        | -1.7        | -1.5        | -1.9        | -2.7        | -5.6        | -6.5        |
| <b>X53002</b> | <b>A</b> | <b>integrin beta-5 subunit</b>                         | <b>39764_at</b>  | <b>7275</b> | <b>development</b>           | <b>1.0</b>  | <b>1.2</b>  | <b>1.1</b>  | <b>1.9</b>  | <b>4.0</b>  | <b>7.1</b>  | <b>4.6</b>  |
| D82344        |          | NBPhox                                                 | 35020_at         | 7275        | development                  | -2.2        | 1.1         | 2.3         | 12.0        | -1.5        | -2.7        | 1.7         |
| X89750        | A        | TGIF protein                                           | 38805_at         | 7275        | development                  | -1.2        | 1.2         | 1.9         | 1.9         | 1.7         | 2.1         | 3.7         |
| X15998        | A        | the chondroitin sulphate proteoglycan versican, V1     | 38111_at         | 7275        | development                  | 1.4         | -1.4        | -1.2        | 1.5         | 1.0         | 4.2         | 3.5         |
| X15998        | A        | the chondroitin sulphate proteoglycan versican, V1     | 38112_g_at       | 7275        | development                  | 1.2         | -1.1        | -1.4        | 1.4         | 2.6         | 5.3         | 2.9         |
| U69196        | A        | cDNA /clone=198754                                     | 38288_at         | 7275        | development                  | -1.4        | 1.7         | 1.0         | 2.1         | 1.3         | 1.7         | 3.5         |
| L12701        |          | engrailed protein (EN2) gene                           | 1133_at          | 7275        | development                  | 4.1         | -2.0        | 1.5         | 2.6         | -2.5        | 1.0         | -1.2        |
| <b>M35011</b> | <b>A</b> | <b>integrin beta-5 subunit</b>                         | <b>2058_s_at</b> | <b>7275</b> | <b>development</b>           | <b>1.0</b>  | <b>1.0</b>  | <b>1.3</b>  | <b>1.1</b>  | <b>2.2</b>  | <b>3.2</b>  | <b>3.5</b>  |
| M16750        | A        | pim-1 oncogene                                         | 1779_s_at        | 7275        | development                  | -1.2        | -1.3        | 2.3         | 1.8         | 2.4         | 1.9         | 3.8         |
| M97675        |          | transmembrane receptor (ror1)                          | 213_at           | 7275        | development                  | 1.0         | -1.2        | 2.3         | -1.1        | -1.5        | -1.9        | -2.8        |
| U81787        | A        | Wnt10B                                                 | 1018_at          | 7275        | development                  | 1.1         | -1.3        | 2.4         | 1.6         | 2.7         | 1.3         | 1.2         |
| M22498        | B        | bone morphogenetic protein 1 (BMP-1)                   | 39407_at         | 7275        | development                  | 3.6         | -1.1        | -1.7        | -3.2        | -2.1        | -4.8        | -1.6        |
| U94898        |          | CC-chemokine receptor 10 (CCR10)                       | 32484_at         | 7275        | development                  | -2.3        | -2.6        | -1.5        | -1.4        | 1.2         | -2.4        | -3.2        |
| AF037339      | B        | cleft lip and palate transmembrane protein 1 (CLPTM1)  | 41413_at         | 7275        | development                  | 2.0         | -1.5        | -1.7        | -1.5        | -1.8        | -2.8        | 1.1         |
| M19481        | A        | foliastatin gene                                       | 38356_at         | 7275        | development                  | 1.6         | -1.3        | 2.0         | 1.6         | -1.5        | 2.1         | 67.5        |
| L37882        | B        | frizzled gene product                                  | 36799_at         | 7275        | development                  | 1.6         | -1.6        | 1.0         | -3.2        | -2.7        | -5.3        | -3.6        |
| M95585        |          | hepatic leukemia factor (HLF)                          | 38627_at         | 7275        | development                  | -2.0        | 1.9         | -6.5        | 3.2         | -1.1        | -3.6        | 1.3         |
| X77956        |          | Id1                                                    | 36617_at         | 7275        | development                  | 1.4         | 1.1         | 4.4         | 2.4         | 1.0         | 1.0         | 1.8         |
| X77956        |          | Id1                                                    | 36618_g_at       | 7275        | development                  | -1.4        | 1.0         | 2.6         | 1.5         | -1.1        | -1.3        | 1.2         |
| X72841        |          | IEF 7442                                               | 41515_at         | 7275        | development                  | -7.0        | 2.2         | 1.3         | 2.9         | 1.1         | -1.4        | 3.4         |
| M73780        |          | integrin beta-8 subunit                                | 889_at           | 7275        | development                  | -1.2        | 1.7         | -4.3        | 3.2         | -1.3        | -1.2        | 1.1         |
| U81262        | A        | LERK5 (LERK5)                                          | 34334_at         | 7275        | development                  | 1.2         | -1.3        | 1.0         | 2.1         | 2.9         | 1.6         | 3.5         |
| X80200        | B        | MLN62                                                  | 37912_at         | 7275        | development                  | 1.3         | -2.0        | -1.2        | -1.7        | -2.1        | -2.6        | 1.0         |
| AF041037      | A        | novel antagonist of FGF signaling (sprouty-1)          | 38767_at         | 7275        | development                  | 1.6         | -1.3        | 1.7         | 3.3         | 4.2         | 2.6         | 1.2         |
| AF059611      | A        | nuclear matrix protein NRP/B (NRPB)                    | 39542_at         | 7275        | development                  | -1.5        | 1.4         | 1.7         | 2.9         | 2.9         | 1.9         | 2.2         |
| AC004079      |          | PAC clone DJ0167F23 from 7p15                          | 33577_at         | 7275        | development                  | 1.3         | 1.4         | 1.3         | 1.1         | 1.2         | -2.7        | -1.3        |
| U43318        |          | putative transmembrane receptor (frizzled 5)           | 34997_r_at       | 7275        | development                  | -1.9        | -1.8        | 1.5         | -2.6        | -1.2        | 1.4         | 1.2         |
| U26914        |          | ras-responsive element binding protein (RREB-1)        | 1714_at          | 7275        | development                  | 1.1         | -1.1        | 3.6         | 1.2         | -1.3        | -1.7        | 1.0         |
| AB006532      | A        | RecQ4 DNA helicase                                     | 39851_at         | 7275        | development                  | -1.1        | 1.0         | -1.8        | -1.2        | -1.2        | 1.3         | 2.9         |
| AF039843      | A        | Sprouty 2 (SPRY2)                                      | 33700_at         | 7275        | development                  | -1.3        | -1.3        | 3.1         | 4.5         | 3.0         | 6.0         | 8.3         |
| M26682        |          | T-cell translocation gene 1 (Tlg-1)                    | 35103_l_at       | 7275        | development                  | 1.0         | 1.2         | 1.3         | 1.2         | -1.1        | -2.7        | -1.3        |
| M26682        |          | T-cell translocation gene 1 (Tlg-1)                    | 35104_r_at       | 7275        | development                  | 1.0         | 1.8         | -2.2        | -1.3        | -2.5        | -1.8        | -1.6        |
| Z71621        |          | Wnt-13                                                 | 33684_at         | 7275        | development                  | 1.2         | 1.0         | 2.7         | 1.2         | -1.9        | 4.2         | 1.2         |
| AA868898      |          | ak55b08.s1 cDNA                                        | 41621_i_at       | 7275        | development                  | 1.0         | 1.2         | 1.1         | 1.6         | -1.3        | -2.6        | -1.3        |
| AA868898      |          | ak55b08.s1 cDNA                                        | 41622_r_at       | 7275        | development                  | -1.2        | 1.0         | 3.3         | -1.6        | -2.5        | -3.4        | -1.2        |
| AL021154      | B        | dJ150O5.2 Inhibitor of DNA binding 3                   | 37043_at         | 7275        | development                  | -1.2        | -1.1        | 1.0         | -1.4        | -2.1        | -2.3        | -4.4        |
| AI765533      | A        | wi81c01.x1 cDNA                                        | 34335_at         | 7275        | development                  | -1.3        | 1.3         | 1.1         | 1.9         | 2.2         | 2.8         | 3.2         |
| AW026535      |          | wv14f10.x1 cDNA                                        | 33830_at         | 7275        | development                  | -2.7        | 1.2         | -1.3        | 2.4         | 1.2         | -1.3        | -1.8        |
| AF016582      |          | checkpoint kinase Chk1 (CHK1)                          | 38920_at         | 7276        | gametogenesis                | -1.3        | -1.4        | 6.2         | 22.1        | 1.2         | 2.0         | 11.9        |
| U19599        |          | (BAX delta)                                            | 1997_s_at        | 7281        | germ-cell development        | 2.9         | 1.6         | 2.7         | 1.2         | -1.7        | -2.9        | -1.1        |
| L22475        |          | Bax gamma                                              | 2067_f_at        | 7281        | germ-cell development        | 1.8         | 1.4         | 8.4         | -1.1        | -1.4        | -4.5        | -1.7        |
| L22473        |          | Bax alpha                                              | 2065_s_at        | 7281        | germ-cell development        | 2.6         | 1.7         | 2.1         | 1.4         | -1.1        | -4.6        | -1.4        |
| AB011088      |          | KIAA0516                                               | 39419_at         | 7283        | spermatogenesis              | 1.1         | 1.0         | -1.5        | 2.8         | 1.4         | 1.4         | 1.0         |
| X07948        |          | transition protein 1 (TP1)                             | 39639_s_at       | 7283        | spermatogenesis              | -4.7        | 1.1         | 10.2        | -1.3        | -1.3        | -3.1        | -1.1        |
| U66898        | A        | cyclin A1                                              | 1914_at          | 7283        | spermatogenesis              | 1.6         | -1.1        | 2.0         | 2.7         | 3.4         | 3.4         | 11.1        |
| Z22780        |          | cyclin                                                 | 365_at           | 7283        | spermatogenesis              | -1.2        | 3.9         | 1.1         | 1.4         | -1.9        | 1.1         | 1.3         |
| X63187        | B        | HE4 extracellular proteinase inhibitor homologue       | 33933_at         | 7283        | spermatogenesis              | 1.6         | -1.1        | -1.2        | -1.7        | -2.3        | -3.2        | -2.3        |
| M97856        | A        | histone-binding protein                                | 33255_at         | 7283        | spermatogenesis              | 1.1         | -1.5        | 1.2         | 2.2         | 2.2         | 3.6         | 2.6         |
| L26336        | B        | heat shock protein HSPA2                               | 36925_at         | 7286        | spermatid development        | -1.5        | 1.2         | -1.4        | -1.3        | -1.2        | -2.2        | -3.4        |

| GenBank     |       |                                                               | Affymetrix   |       |                                      |      | Fold Change |       |      |      |      |      |  |
|-------------|-------|---------------------------------------------------------------|--------------|-------|--------------------------------------|------|-------------|-------|------|------|------|------|--|
| Accession # | Group | Affymetric Gene Annotation                                    | Probe set id | GO id | GO Biological Process                | 0    | 4           | 6     | 8    | 12   | 16   | 24   |  |
| Y15908      |       | dia-12c protein                                               | 34263_s_at   | 7292  | female gamete generation             | 1.2  | -1.3        | -1.7  | 2.6  | -1.1 | 1.6  | 1.1  |  |
| M25915      | B     | complement cytolytic inhibitor (CLI)                          | 36780_at     | 7338  | fertilization (sensu Animalia)       | 1.0  | -1.1        | 1.0   | -1.8 | -1.7 | -2.1 | -2.7 |  |
| S58544      | A     | 75 kDa infertility-related sperm protein                      | 36744_at     | 7338  | fertilization (sensu Animalia)       | -1.7 | -1.5        | -1.5  | 1.9  | 2.0  | 1.7  | 2.6  |  |
| D86963      |       | KIAA0208                                                      | 40873_at     | 7345  | embryogenesis and morphogenesis      | 1.2  | -1.4        | 1.4   | -3.0 | 1.5  | 1.2  | 1.4  |  |
| AJ007042    | A     | TRX5 protein                                                  | 38988_at     | 7345  | embryogenesis and morphogenesis      | 1.0  | 1.2         | -1.5  | 1.5  | 2.0  | 3.6  | 4.2  |  |
| U50410      |       | heparan sulphate proteoglycan (OC15)                          | 39350_at     | 7345  | embryogenesis and morphogenesis      | 1.4  | 1.1         | -1.1  | 1.3  | -1.5 | -3.2 | 1.9  |  |
| X58072      | B     | HGATA3 trans-acting T-cell specific transcription factor      | 40511_at     | 7345  | embryogenesis and morphogenesis      | 1.0  | -1.4        | -2.2  | -1.5 | -2.4 | -4.5 | -4.4 |  |
| M26326      | A     | keratin 18                                                    | 35766_at     | 7345  | embryogenesis and morphogenesis      | 1.6  | -1.1        | -1.4  | -1.1 | 1.7  | 2.1  | 2.9  |  |
| U73313      |       | myogenic repressor 1 (MDF1)                                   | 38176_at     | 7345  | embryogenesis and morphogenesis      | 1.0  | 1.3         | 2.8   | 4.1  | 1.4  | 2.0  | 1.6  |  |
| U97699      | B     | Notch3 (NOTCH3)                                               | 38750_at     | 7345  | embryogenesis and morphogenesis      | 1.1  | -1.4        | -2.2  | -3.1 | -1.5 | -2.2 | -3.4 |  |
| Z71621      |       | Wnt-13                                                        | 33884_at     | 7345  | embryogenesis and morphogenesis      | 1.2  | 1.0         | 2.7   | 1.2  | -1.9 | 4.2  | 1.2  |  |
| S81914      | A     | radiation-inducible immediate-early gene                      | 1237_at      | 7345  | embryogenesis and morphogenesis      | 1.0  | 1.2         | 3.5   | 3.1  | 3.7  | 4.7  | 8.5  |  |
| X17033      | A     | integrin alpha-2 subunit                                      | 1978_at      | 7397  | histogenesis and organogenesis       | 1.4  | -1.4        | 2.1   | 3.4  | 4.4  | 5.0  | 7.1  |  |
| L06797      | B     | (clone L5) orphan G protein-coupled receptor                  | 649_s_at     | 7397  | histogenesis and organogenesis       | 1.5  | 1.2         | -1.4  | -1.8 | -1.2 | -1.4 | -2.6 |  |
| M95712      |       | B-raf                                                         | 1654_at      | 7397  | histogenesis and organogenesis       | -1.2 | 1.2         | -2.9  | -2.0 | -1.5 | 1.3  | -1.2 |  |
| U81262      | A     | LERK5 (LERK5)                                                 | 34334_at     | 7397  | histogenesis and organogenesis       | 1.2  | -1.3        | 1.0   | 2.1  | 2.9  | 1.6  | 3.5  |  |
| AF039843    | A     | Sprouty 2 (SPRY2)                                             | 33700_at     | 7397  | histogenesis and organogenesis       | 1.3  | 1.3         | 3.1   | 4.5  | 3.0  | 6.0  | 8.3  |  |
| AI765533    | A     | wi1c01.x1 cDNA                                                | 34335_at     | 7397  | histogenesis and organogenesis       | -1.3 | 1.3         | 1.1   | 1.9  | 2.2  | 2.8  | 3.2  |  |
| X14787      |       | thrombospondin                                                | 115_at       | 7399  | neurogenesis                         | 1.0  | -1.7        | -1.3  | 1.1  | 1.1  | 1.0  | 2.5  |  |
| AB006713    |       | dihydropyrimidinase related protein 4                         | 39503_s_at   | 7399  | neurogenesis                         | 1.1  | -1.1        | -1.5  | 2.1  | 1.4  | -3.1 | 1.1  |  |
| D86963      |       | KIAA0208                                                      | 40873_at     | 7399  | neurogenesis                         | 1.2  | -1.4        | 1.4   | -3.0 | 1.5  | 1.2  | 1.4  |  |
| D87467      |       | KIAA0277                                                      | 38062_at     | 7399  | neurogenesis                         | -1.8 | 1.3         | -1.3  | 1.5  | 1.6  | 3.0  | 1.2  |  |
| AB011141    |       | KIAA0569                                                      | 35681_r_at   | 7399  | neurogenesis                         | 1.2  | -2.8        | 1.0   | 1.5  | -1.5 | -1.3 | -1.3 |  |
| D82344      |       | NBPhox                                                        | 35020_at     | 7399  | neurogenesis                         | -2.2 | 1.1         | 2.3   | 12.0 | -1.5 | -2.7 | 1.7  |  |
| D16532      | A     | very low density lipoprotein receptor                         | 36873_at     | 7399  | neurogenesis                         | -2.3 | -1.1        | -1.8  | 1.2  | -1.1 | 5.5  | 24.2 |  |
| L06797      | B     | (clone L5) orphan G protein-coupled receptor                  | 649_s_at     | 7399  | neurogenesis                         | 1.5  | 1.2         | -1.4  | -1.8 | -1.2 | -1.4 | -2.6 |  |
| U91512      |       | adhesion molecule ninjurin                                    | 41475_at     | 7399  | neurogenesis                         | -1.1 | -1.1        | -5.8  | -7.0 | -1.6 | -1.3 | 3.1  |  |
| X01703      | B     | gene alpha-tubulin (b alpha 1)                                | 40567_at     | 7399  | neurogenesis                         | -1.5 | -1.3        | -1.8  | -1.7 | -1.3 | -2.6 | -2.6 |  |
| U81262      | A     | LERK5 (LERK5)                                                 | 34334_at     | 7399  | neurogenesis                         | 1.2  | -1.3        | 1.0   | 2.1  | 2.9  | 1.6  | 3.5  |  |
| AF039704    | B     | lysosomal pepstatin insensitive protease (CLN2)               | 32824_at     | 7399  | neurogenesis                         | 1.2  | -1.4        | -2.7  | -3.4 | -2.3 | -3.0 | -1.4 |  |
| U97105      |       | N2A3                                                          | 40607_at     | 7399  | neurogenesis                         | 1.1  | 1.2         | -1.7  | 1.3  | 2.2  | 2.9  | 1.7  |  |
| AF059611    | A     | nuclear matrix protein NRP/B (NRPB)                           | 39542_at     | 7399  | neurogenesis                         | -1.5 | 1.4         | 1.7   | 2.9  | 2.9  | 1.9  | 2.2  |  |
| AF023462    |       | peroxisomal phytanoyl-CoA alpha-hydroxylase (PAHX)            | 32724_at     | 7399  | neurogenesis                         | -2.2 | 1.3         | 1.1   | 1.3  | 1.0  | 1.2  | -2.5 |  |
| AF040990    |       | roundabout 1 (robo1)                                          | 32944_at     | 7399  | neurogenesis                         | -2.8 | -1.1        | -3.6  | 1.4  | -1.2 | -1.2 | 1.3  |  |
| AI765533    | A     | wi1c01.x1 cDNA                                                | 34335_at     | 7399  | neurogenesis                         | -1.3 | 1.3         | 1.1   | 1.9  | 2.2  | 2.8  | 3.2  |  |
| X01703      | B     | gene alpha-tubulin (b alpha 1)                                | 40567_at     | 7404  | glia cell differentiation            | -1.5 | -1.3        | -1.8  | -1.7 | -1.3 | -2.6 | -2.6 |  |
| AB002367    |       | KIAA0369                                                      | 38957_at     | 7417  | central nervous system development   | -1.5 | 1.1         | -1.7  | 2.0  | -1.2 | -4.1 | -3.0 |  |
| U61849      |       | neuronal pentraxin 1 (NPTX1)                                  | 37921_at     | 7417  | central nervous system development   | -1.8 | 1.4         | 1.5   | 8.8  | 1.1  | -1.6 | -6.8 |  |
| M93426      | A     | protein tyrosine phosphatase zeta-polypeptide                 | 1364_at      | 7417  | central nervous system development   | -1.3 | 1.5         | -1.2  | 2.1  | 3.1  | 3.6  | 3.3  |  |
| AI743090    | A     | wg87a11.x1 cDNA                                               | 39549_at     | 7417  | central nervous system development   | 1.0  | 1.1         | 1.1   | 2.1  | 2.4  | 2.9  | 1.8  |  |
| U03688      | B     | dioxin-inducible cytochrome P450 (CYP1B1)                     | 859_at       | 7456  | eye morphogenesis (sensu Drosophila) | -1.5 | 1.1         | -2.1  | -1.2 | -1.5 | -2.5 | -4.3 |  |
| U03688      | B     | dioxin-inducible cytochrome P450 (CYP1B1)                     | 40671_at     | 7456  | eye morphogenesis (sensu Drosophila) | 3.1  | 1.0         | -2.5  | 1.0  | -1.8 | -1.9 | -2.2 |  |
| U69186      | A     | cDNA (clone)198754                                            | 38288_at     | 7459  | ectoderm/mesoderm interaction        | -1.4 | 1.7         | 1.0   | 2.1  | 1.3  | 1.7  | 3.5  |  |
| AF059202    |       | ACA1 related gene product 1                                   | 34255_at     | 7503  | fat body development                 | 1.8  | -2.8        | -10.3 | -2.1 | -1.7 | -2.7 | 1.0  |  |
| D86963      |       | KIAA0208                                                      | 40873_at     | 7507  | heart development                    | 1.2  | -1.4        | 1.4   | -3.0 | 1.5  | 1.2  | 1.4  |  |
| U43142      |       | vascular endothelial growth factor related protein            | 159_at       | 7515  | lymph gland development              | 2.7  | -2.3        | -2.0  | 1.3  | 1.5  | 1.2  | 3.3  |  |
| AF068180    | B     | B cell linker protein BLNK, alternatively spliced,            | 38242_at     | 7516  | hemocyte development                 | -1.2 | 2.3         | 1.3   | -1.1 | -2.5 | -2.2 | -5.9 |  |
| X13988      |       | embryonic myosin heavy chain                                  | 32729_at     | 7517  | muscle development                   | -1.4 | -1.4        | -5.1  | 6.8  | 1.8  | 2.9  | 1.8  |  |
| Y13492      |       | smoothelin-B                                                  | 31830_s_at   | 7517  | muscle development                   | 1.3  | -2.0        | -1.2  | -1.2 | 1.0  | 1.1  | 4.7  |  |
| M60278      | A     | heparin-binding EGF-like growth factor                        | 38037_at     | 7517  | muscle development                   | 1.3  | 1.5         | 2.7   | 1.8  | 2.3  | 2.8  | 33.8 |  |
| X63741      | A     | pilot                                                         | 40375_at     | 7517  | muscle development                   | 1.2  | -1.2        | -1.2  | 4.1  | 32.3 | 1.0  | 1.5  |  |
| Y10313      | A     | IFRD1 (PC4)                                                   | 37679_at     | 7518  | myoblast cell fate determination     | 1.2  | 1.0         | -1.9  | 1.4  | 1.8  | 1.6  | 4.2  |  |
| AC005192    | A     | BAC clone RG163K11 from 7q31                                  | 32901_s_at   | 7518  | myoblast cell fate determination     | -1.3 | -1.1        | -1.3  | 1.4  | 1.6  | 1.2  | 6.3  |  |
| X57527      | A     | COL8A1 alpha 1(VIII) collagen                                 | 37459_at     | 7525  | somatic muscle development           | -1.8 | -1.1        | 1.0   | 2.0  | 1.9  | 3.1  | 5.0  |  |
| AL049381    | B     | DKFz586J2118                                                  | 33355_at     | 7548  | sex differentiation                  | 1.3  | -1.1        | 1.4   | -2.3 | 1.0  | -1.7 | -3.2 |  |
| D14874      |       | adrenomedullin precursor                                      | 34777_at     | 7565  | pregnancy                            | -1.5 | 1.1         | -2.7  | -1.4 | -1.2 | -1.3 | -2.2 |  |
| M34455      |       | interferon-gamma-inducible indoleamine 2,3-dioxygenase (IDO)  | 36804_at     | 7565  | pregnancy                            | -1.5 | 1.0         | 1.1   | 1.5  | 1.5  | -1.5 | 2.5  |  |
| M24351      | A     | parathyroid hormone-like protein                              | 615_s_at     | 7565  | pregnancy                            | -1.5 | -2.0        | -1.2  | 2.6  | 3.9  | 2.8  | 6.1  |  |
| U25988      |       | pregnancy-specific glycoprotein 13 (PSG13)                    | 33759_f_at   | 7565  | pregnancy                            | -1.1 | -1.6        | 3.2   | 1.0  | 1.0  | -7.8 | 1.5  |  |
| J03802      | A     | renal carcinoma parathyroid hormone-like peptide              | 37989_at     | 7565  | pregnancy                            | 1.1  | 1.6         | -1.9  | 1.4  | 9.1  | 1.1  | 12.8 |  |
| L76937      | A     | Werner syndrome gene                                          | 38136_at     | 7568  | aging                                | 1.4  | 1.2         | 1.6   | 2.2  | 3.1  | -1.1 | 1.2  |  |
| U09284      |       | PINCH protein                                                 | 39232_at     | 7569  | cell aging                           | -1.4 | 2.2         | 1.5   | 2.5  | 1.4  | 1.0  | 1.4  |  |
| U25997      |       | stanniocalcin precursor (STC)                                 | 41354_at     | 7584  | response to nutrients                | -4.2 | -2.5        | -2.1  | -1.2 | 2.7  | 2.5  | 2.1  |  |
| AF098462    | A     | stanniocalcin-related protein                                 | 32043_at     | 7584  | response to nutrients                | -1.2 | 1.0         | 1.3   | 2.2  | 2.0  | 1.5  | 9.9  |  |
| X71345      | A     | trypsinogen IV b-m                                            | 40043_at     | 7586  | digestion                            | -1.6 | 1.8         | -1.1  | 1.2  | 2.0  | 1.9  | 4.6  |  |
| AF038007    |       | FIC1                                                          | 33634_at     | 7586  | digestion                            | 1.7  | 1.1         | 1.7   | 1.3  | 1.1  | -2.8 | -2.0 |  |
| U66061      |       | trypsinogen C                                                 | 32796_f_at   | 7586  | digestion                            | -3.7 | -1.2        | 1.3   | -2.6 | 1.7  | 1.8  | 4.0  |  |
| X68487      | A     | A2b adenosine receptor                                        | 36324_at     | 7588  | excretion                            | 1.7  | -1.2        | 1.4   | 2.8  | 1.9  | 1.9  | 2.0  |  |
| D14874      |       | adrenomedullin precursor                                      | 34777_at     | 7588  | excretion                            | -1.5 | 1.1         | -2.7  | -1.4 | -1.2 | -1.3 | -2.2 |  |
| X87159      | B     | beta subunit of epithelial amiloride-sensitive sodium channel | 39682_at     | 7588  | excretion                            | 1.0  | 1.1         | -1.2  | -1.1 | -1.1 | -2.6 | -1.4 |  |
| AB020634    |       | KIAA0827                                                      | 40713_at     | 7588  | excretion                            | 1.5  | 6.0         | 11.7  | 1.9  | 1.6  | 6.1  | -2.4 |  |
| AB001325    | B     | AQP3 gene aquaporin 3 (water channel)                         | 39249_at     | 7588  | excretion                            | 1.2  | 1.0         | 1.1   | -1.9 | -1.8 | -2.8 | -1.8 |  |
| M25809      |       | endomembrane proton pump subunit                              | 32959_at     | 7588  | excretion                            | -1.4 | 1.1         | 1.9   | -1.3 | -1.3 | -2.6 | -2.3 |  |
| M24351      | A     | parathyroid hormone-like protein                              | 615_s_at     | 7588  | excretion                            | -1.5 | -2.0        | -1.2  | 2.6  | 3.9  | 2.8  | 6.1  |  |
| J03802      | A     | renal carcinoma parathyroid hormone-like peptide              | 37989_at     | 7588  | excretion                            | 1.1  | 1.6         | -1.9  | 1.4  | 9.1  | 1.1  | 12.8 |  |
| M24351      | A     | parathyroid hormone-like protein                              | 615_s_at     | 7595  | lactation                            | -1.5 | -2.0        | -1.2  | 2.6  | 3.9  | 2.8  | 6.1  |  |
| J03802      | A     | renal carcinoma parathyroid hormone-like peptide              | 37989_at     | 7595  | lactation                            | 1.1  | 1.6         | -1.9  | 1.4  | 9.1  | 1.1  | 12.8 |  |
| X14787      |       | thrombospondin                                                | 115_at       | 7596  | blood coagulation                    | 1.0  | -1.7        | -1.3  | 1.1  | 1.1  | 1.0  | 2.5  |  |
| X17033      | A     | integrin alpha-2 subunit                                      | 1978_at      | 7596  | blood coagulation                    | 1.4  | -1.4        | 2.1   | 3.4  | 4.4  | 5.0  | 7.1  |  |

| GenBank     | Group | Affymetric                                                         | GO id        | GO Biological Process | Fold Change                    |      |      |      |      |      |      |       |
|-------------|-------|--------------------------------------------------------------------|--------------|-----------------------|--------------------------------|------|------|------|------|------|------|-------|
| Accession # | Group | Affymetric Gene Annotation                                         | Probe set id | GO id                 | GO Biological Process          | 0    | 4    | 6    | 8    | 12   | 16   | 24    |
| L42243      |       | CDP-118) alternatively splice (clone 51H8) alternatively splice    | 1569_r_at    | 7596                  | blood coagulation              | 1.2  | -1.3 | -5.5 | -1.3 | -1.3 | 1.3  | 1.7   |
| K02566      |       | alpha-2-thiol proteinase inhibitor                                 | 37234_at     | 7596                  | blood coagulation              | 1.2  | 1.4  | 6.9  | 1.8  | 1.1  | -2.8 | -1.9  |
| M14083      | A     | beta-migrating plasminogen activator inhibitor I                   | 38125_at     | 7596                  | blood coagulation              | 1.5  | 1.0  | 1.5  | 1.5  | 1.8  | 1.2  | 3.0   |
| J02931      | A     | placental tissue factor (two ms)                                   | 36543_at     | 7596                  | blood coagulation              | 1.0  | -1.1 | 2.4  | 5.7  | 8.2  | 11.3 | 8.2   |
| U67058      | A     | proteinase activated receptor-2                                    | 38247_at     | 7596                  | blood coagulation              | 1.0  | 1.3  | 1.0  | 1.3  | 1.0  | 1.0  | 2.5   |
| AJ007590    |       | XRP2 protein                                                       | 39964_at     | 7601                  | vision                         | 1.2  | 1.9  | -1.1 | 2.8  | 1.7  | 1.0  | 1.3   |
| U03688      | B     | dioxin-inducible cytochrome P450 (CYP1B1)                          | 859_at       | 7601                  | vision                         | -1.5 | 1.1  | -2.1 | -1.2 | -1.5 | -2.5 | -4.3  |
| U65887      |       | CDP-diacylglycerol synthase                                        | 40217_s_at   | 7601                  | vision                         | 1.1  | 1.3  | -2.7 | 1.4  | 1.1  | -1.3 | 1.0   |
| U03689      | B     | dioxin-inducible cytochrome P450 (CYP1B1)                          | 36071_at     | 7601                  | vision                         | 3.1  | 1.0  | -2.5 | 1.0  | -1.8 | -1.9 | -2.2  |
| AF023482    |       | peroxisomal phytanoyl-CoA alpha-hydroxylase (PAHX)                 | 32724_at     | 7601                  | vision                         | -2.2 | 1.3  | 1.1  | 1.3  | 1.0  | 1.2  | -2.5  |
| U57629      | A     | retinitis pigmentosa GTPase regulator (RPGR)                       | 38164_at     | 7601                  | vision                         | 1.2  | -2.1 | 1.6  | 2.5  | 1.5  | 1.9  | 3.0   |
| Z18859      | B     | cone transducin alpha subunit                                      | 34571_at     | 7601                  | vision                         | 1.6  | 1.4  | -1.5 | -1.3 | -1.2 | -2.6 | 1.0   |
| AL038340    | B     | DKFZp566K192                                                       | 32243_g_at   | 7601                  | vision                         | -1.2 | -1.1 | -1.7 | -1.9 | -2.3 | -3.8 | -4.9  |
| AL038340    | B     | DKFZp566K192_s1                                                    | 32242_at     | 7601                  | vision                         | -1.1 | -1.1 | -1.5 | -1.9 | -3.0 | -4.3 | -4.4  |
| Z18859      | B     | cone transducin alpha subunit                                      | 34571_at     | 7602                  | phototransduction              | 1.6  | 1.4  | -1.5 | -1.3 | -1.2 | -2.6 | 1.0   |
| L20046      |       | ERCC5 excision repair protein                                      | 2063_at      | 7605                  | hearing                        | -1.6 | 1.4  | -3.9 | 1.3  | -1.2 | 1.5  | -1.5  |
| AF099730    |       | connexin 31 (GJB3) gene                                            | 41076_at     | 7605                  | hearing                        | -1.1 | -6.8 | 1.9  | 1.1  | 2.1  | 4.7  | 3.6   |
| M25809      |       | endomembrane proton pump subunit                                   | 32959_at     | 7605                  | hearing                        | -1.4 | 1.1  | 1.9  | -1.3 | -1.3 | -2.6 | -3.2  |
| D89928      |       | HKL1                                                               | 37106_at     | 7605                  | hearing                        | 1.1  | -1.1 | -1.9 | 2.6  | -1.2 | -1.6 | -1.7  |
| AF023462    |       | peroxisomal phytanoyl-CoA alpha-hydroxylase (PAHX)                 | 32724_at     | 7605                  | hearing                        | -2.2 | 1.3  | 1.1  | 1.3  | 1.0  | 1.2  | -2.5  |
| U72936      |       | putative DNA dependent ATPase and helicase (ATRX)                  | 39146_at     | 7605                  | hearing                        | 1.2  | 7.7  | 1.2  | 1.9  | 4.2  | 1.9  | -1.7  |
| AL031228    |       | dj1033B10.10 (membrane protein with histidine rich charge cluster) | 41652_at     | 7605                  | hearing                        | 2.4  | 2.9  | 2.2  | 2.3  | 1.4  | 1.1  | -1.3  |
| M68840      | B     | monoamine oxidase A (MAOA)                                         | 41772_at     | 7610                  | behavior                       | -1.3 | 1.4  | -1.3 | -1.1 | -1.4 | -2.0 | -5.1  |
| AA420624    | B     | nc61c12.r1 cDNA                                                    | 41770_at     | 7610                  | behavior                       | 1.0  | 1.3  | -1.6 | -1.3 | -2.4 | -5.6 | -4.4  |
| AA420624    | B     | nc61c12.r1 cDNA                                                    | 41771_g_at   | 7610                  | behavior                       | -1.1 | 1.2  | -1.4 | -1.2 | -1.8 | -2.5 | -4.5  |
| AF030555    | A     | acyl-CoA synthetase 4 (ACS4)                                       | 38099_r_at   | 7611                  | learning and/or memory         | 1.0  | 1.1  | -1.2 | 1.5  | 1.2  | 2.7  | 2.7   |
| D18532      | A     | very low density lipoprotein receptor                              | 36873_at     | 7613                  | memory                         | -2.3 | -1.1 | -1.8 | 1.2  | -1.1 | 5.5  | 24.2  |
| L10343      |       | Human elafin gene                                                  | 41469_at     | 7620                  | copulation                     | -1.3 | 1.4  | 1.0  | -1.5 | 1.3  | 1.1  | 2.5   |
| U48213      | B     | D-site binding protein gene                                        | 40274_at     | 7622                  | rhythmic behavior              | 1.1  | 1.6  | -1.5 | -1.2 | -2.3 | -1.5 | -3.1  |
| AB002345    | A     | KIAA0347                                                           | 35008_at     | 7623                  | circadian rhythm               | -1.2 | 1.0  | 2.1  | 1.5  | 5.5  | 1.3  | 1.6   |
| X63741      | A     | pilot                                                              | 40375_at     | 7623                  | circadian rhythm               | 1.2  | -1.2 | -1.2 | 4.1  | 32.3 | 1.0  | 1.5   |
| D14874      |       | adrenomedullin precursor                                           | 34777_at     | 8015                  | circulation                    | -1.5 | 1.1  | -2.7 | -1.4 | -1.2 | -1.3 | -2.2  |
| M15856      |       | lipoprotein lipase                                                 | 41209_at     | 8015                  | circulation                    | -1.4 | 1.0  | -3.5 | -2.0 | 1.5  | -1.5 | 1.0   |
| M19267      | B     | tropomyosin                                                        | 36790_at     | 8016                  | regulation of heart rate       | 1.2  | -1.2 | -1.4 | 1.0  | -1.6 | -2.6 | -3.0  |
| M19267      | B     | tropomyosin                                                        | 36791_g_at   | 8016                  | regulation of heart rate       | 1.2  | -1.2 | -1.2 | 1.3  | -1.3 | -1.2 | -3.2  |
| Z24727      | B     | tropomyosin isoform                                                | 36792_at     | 8016                  | regulation of heart rate       | 1.1  | 1.1  | 1.5  | -1.2 | -1.3 | -1.6 | -4.6  |
| D32050      |       | alanyl-tRNA synthetase                                             | 36185_at     | 8033                  | tRNA processing                | 1.1  | -1.2 | -1.2 | 1.0  | -1.1 | 1.0  | 2.7   |
| X15998      | A     | the chondroitin sulphate proteoglycan versican, V1                 | 38111_at     | 8037                  | cell recognition               | 1.4  | -1.4 | -1.2 | 1.5  | 1.0  | 4.2  | 3.5   |
| X15998      | A     | the chondroitin sulphate proteoglycan versican, V1                 | 38112_g_at   | 8037                  | cell recognition               | 1.2  | -1.1 | -1.4 | 1.4  | 2.6  | 5.3  | 2.9   |
| U65416      |       | MHC class I molecule (MICB) gene                                   | 35937_at     | 8037                  | cell recognition               | 1.2  | 1.6  | -3.4 | 1.1  | 3.2  | 3.5  | 1.1   |
| AB023203    | A     | KIAA0986                                                           | 40000_r_at   | 8104                  | protein localization           | 1.0  | -1.9 | -1.2 | 2.8  | 2.5  | 2.1  | 1.4   |
| X78947      | A     | connective tissue growth factor                                    | 36838_at     | 8151                  | cell growth and/or maintenance | -1.4 | 1.1  | -1.1 | 3.0  | 4.2  | 2.7  | 4.4   |
| X92516      | A     | HMGIC                                                              | 35200_at     | 8151                  | cell growth and/or maintenance | -1.1 | 1.2  | 2.4  | 2.6  | 2.8  | 3.3  | 3.0   |
| D63881      | A     | KIAA0160                                                           | 40957_at     | 8151                  | cell growth and/or maintenance | 1.3  | 1.1  | -1.2 | 2.3  | 1.7  | 2.6  | 2.7   |
| Z49194      |       | oct-binding factor                                                 | 36239_at     | 8151                  | cell growth and/or maintenance | -3.5 | -7.6 | -1.2 | 1.1  | -4.8 | -1.3 | -1.4  |
| V01512      | A     | cellular oncogene c-fos                                            | 1916_s_at    | 8151                  | cell growth and/or maintenance | -1.3 | 1.8  | 2.9  | 4.7  | 7.1  | 6.4  | 5.1   |
| M15990      | A     | c-yes-1                                                            | 1674_at      | 8151                  | cell growth and/or maintenance | -1.8 | 1.1  | -1.3 | 2.2  | 1.7  | 2.5  | 1.5   |
| M16750      | A     | pim-1 oncogene                                                     | 1779_s_at    | 8151                  | cell growth and/or maintenance | -1.2 | -1.3 | 2.3  | 1.8  | 2.4  | 1.9  | 3.8   |
| M22489      |       | bone morphogenetic protein 2A (BMP-2A)                             | 1113_at      | 8151                  | cell growth and/or maintenance | -1.4 | -2.1 | -1.1 | -1.2 | 1.3  | -1.5 | 3.1   |
| M22489      |       | bone morphogenetic protein 2A (BMP-2A)                             | 40367_at     | 8151                  | cell growth and/or maintenance | -1.2 | -1.9 | 1.0  | 1.1  | 1.1  | -1.5 | 2.5   |
| M95712      |       | B-raf                                                              | 1654_at      | 8151                  | cell growth and/or maintenance | -1.2 | 1.2  | -2.9 | -2.0 | -1.5 | 1.3  | -2.3  |
| U07806      | A     | camptothecin resistant clone CEM/C2 DNA topoisomerase              | 1030_s_at    | 8151                  | cell growth and/or maintenance | 1.0  | -1.1 | 1.6  | 2.7  | 1.7  | 1.8  | 2.2   |
| V01512      | A     | cellular oncogene c-fos                                            | 1915_s_at    | 8151                  | cell growth and/or maintenance | 1.1  | 1.6  | 1.9  | 2.5  | 3.0  | 2.2  | 3.5   |
| AF017257    | B     | chromosome 21 derived BAC                                          | 38739_at     | 8151                  | cell growth and/or maintenance | -1.1 | -1.1 | -2.6 | -2.1 | -2.4 | -2.5 | -2.8  |
| AF070641    | A     | clone 24421 sequence                                               | 37156_at     | 8151                  | cell growth and/or maintenance | 4.7  | -1.5 | 3.3  | 2.5  | 7.1  | 3.4  | 93.3  |
| X64229      | A     | dek                                                                | 38992_at     | 8151                  | cell growth and/or maintenance | 1.0  | 1.1  | 1.3  | 1.8  | 2.0  | 2.6  | 3.1   |
| AL049381    | B     | DKFZp586J2118                                                      | 33355_at     | 8151                  | cell growth and/or maintenance | 1.3  | -1.1 | 1.4  | -2.3 | 1.0  | -1.7 | -3.2  |
| U07804      | A     | DNA topoisomerase I                                                | 1710_s_at    | 8151                  | cell growth and/or maintenance | 1.3  | -1.2 | 1.7  | 2.6  | 1.7  | 1.2  | 2.6   |
| M06030      | A     | EV12B3F gene                                                       | 40019_at     | 8151                  | cell growth and/or maintenance | 7.0  | -1.2 | -1.7 | 5.7  | 4.0  | 8.1  | 104.7 |
| M23379      | A     | GTPase-activating protein ras p21 (RASA)                           | 1675_at      | 8151                  | cell growth and/or maintenance | -1.3 | 1.5  | 1.7  | 3.5  | 3.2  | 3.7  | 5.6   |
| M23379      | A     | GTPase-activating protein ras p21 (RASA)                           | 36935_at     | 8151                  | cell growth and/or maintenance | -1.2 | 1.2  | -1.5 | 2.3  | 2.4  | 2.5  | 3.6   |
| U50410      |       | heparan sulphate proteoglycan (OC15)                               | 39350_at     | 8151                  | cell growth and/or maintenance | 1.4  | 1.1  | -1.1 | 1.3  | -1.5 | -3.2 | 1.9   |
| M95585      |       | hepatic leukemia factor (HLF)                                      | 38627_at     | 8151                  | cell growth and/or maintenance | -2.0 | 1.9  | -6.5 | 3.2  | -1.1 | -3.6 | 1.3   |
| AF064606    |       | KB07 protein                                                       | 36437_s_at   | 8151                  | cell growth and/or maintenance | 1.7  | 1.4  | 1.2  | 2.5  | 1.2  | -1.2 | 2.7   |
| AF040963    | B     | Mad4 homolog (Mad4)                                                | 38639_at     | 8151                  | cell growth and/or maintenance | -1.2 | -1.2 | 1.3  | -2.2 | -2.1 | -2.3 | -4.6  |
| U88965      |       | PO42 gene                                                          | 31392_r_at   | 8151                  | cell growth and/or maintenance | 1.0  | -1.6 | -2.3 | 2.0  | -1.8 | 1.7  | -2.6  |
| AF068227    | B     | putative transmembrane protein (CLN5)                              | 34324_at     | 8151                  | cell growth and/or maintenance | 1.7  | -1.1 | -1.2 | -1.6 | -1.3 | -2.3 | -2.5  |
| AF055376    | B     | short m transcription factor C-MAF (c-maf)                         | 41505_r_at   | 8151                  | cell growth and/or maintenance | -1.4 | 1.8  | -4.0 | -2.1 | -2.3 | -6.2 | -17.5 |
| AF055376    | B     | short m transcription factor C-MAF (c-maf)                         | 41504_s_at   | 8151                  | cell growth and/or maintenance | -1.6 | 2.7  | -7.1 | -3.3 | -2.4 | -5.8 | -6.7  |
| M31682      | B     | testicular inhibin beta-B-subunit                                  | 38545_at     | 8151                  | cell growth and/or maintenance | -1.3 | -1.1 | -1.2 | -1.2 | -1.6 | -2.0 | -3.7  |
| X75621      | B     | TSC2 tuberin                                                       | 38813_at     | 8151                  | cell growth and/or maintenance | 1.4  | -1.7 | -1.5 | -2.4 | -1.9 | -3.0 | -2.5  |
| AF014402    | B     | type-2 phosphatidic acid phosphatase alpha-1 (PAP2-a1)             | 34797_at     | 8151                  | cell growth and/or maintenance | 1.0  | 1.0  | -3.2 | -2.6 | -3.5 | -3.7 | -4.5  |
| U16954      | B     | AF1q                                                               | 36941_at     | 8151                  | cell growth and/or maintenance | 1.0  | 1.4  | 1.0  | -1.2 | -2.1 | 1.2  | -4.4  |
| AL022238    | B     | dj1042K10.3 (novel protein)                                        | 35563_at     | 8151                  | cell growth and/or maintenance | 1.0  | 1.2  | 1.0  | -6.2 | -2.0 | -3.2 | -2.1  |
| S81914      | A     | radiation-inducible immediate-early gene                           | 123_at       | 8151                  | cell growth and/or maintenance | 1.0  | 1.2  | 3.5  | 3.1  | 3.7  | 4.7  | 8.5   |
| S62138      |       | TL5/CHOIP-hybrid gene                                              | 39420_at     | 8151                  | cell growth and/or maintenance | -1.1 | 1.1  | -1.7 | -1.3 | -1.5 | -1.2 | 12.7  |
| X51405      |       | carboxypeptidase E (EC 3.4.17.10)                                  | 36606_at     | 8152                  | metabolism                     | 1.2  | 1.2  | -2.6 | 1.8  | -1.2 | -2.6 | -1.9  |
| D8960       | A     | KIAA0205                                                           | 34387_at     | 8152                  | metabolism                     | 1.2  | 1.3  | -1.5 | 1.8  | 1.9  | 1.8  | 2.9   |
| AB011542    | B     | MEGF9                                                              | 36488_at     | 8152                  | metabolism                     | -1.3 | 1.1  | -1.8 | -1.2 | -1.5 | -2.0 | -3.1  |

| GenBank  | Accession # | Group  | Affymetric Gene Annotation                         | Affymatrix Probe set id | GO id | GO Biological Process                                              | 0    | 4     | 6    | 8    | 12   | 16    | 24    |
|----------|-------------|--------|----------------------------------------------------|-------------------------|-------|--------------------------------------------------------------------|------|-------|------|------|------|-------|-------|
| U38545   |             |        | ARF-activated phosphatidylcholine-specific phos    | 177_at                  | 8152  | metabolism                                                         | -1.1 | -1.4  | 1.3  | -1.6 | -3.5 | -2.4  | -2.0  |
| U26726   | B           |        | 11-beta-hydroxysteroid dehydrogenase type 2        | 39697_at                | 8152  | metabolism                                                         | -1.2 | 1.0   | -1.7 | -2.3 | -3.4 | -11.3 | -7.1  |
| M27396   |             |        | asparagine synthetase                              | 36671_at                | 8152  | metabolism                                                         | 1.9  | -1.1  | -1.5 | -1.1 | -1.2 | -1.2  | 8.4   |
| AF070606 | A           |        | clone 24411 sequence                               | 34188_at                | 8152  | metabolism                                                         | 1.9  | -1.1  | -1.7 | 2.5  | 2.0  | 1.6   | 3.2   |
| AF052143 | A           |        | clone 24466 sequence                               | 39575_at                | 8152  | metabolism                                                         | -1.4 | 1.5   | 1.3  | 2.6  | 2.6  | 5.0   | 3.4   |
| U11863   | B           |        | clone HP-DAO2 diamine oxidase                      | 37186_s_at              | 8152  | metabolism                                                         | -1.7 | 1.0   | -1.7 | -1.9 | -1.7 | -3.3  | -3.2  |
| AL096716 |             |        | DKFZp564M1462                                      | 32022_at                | 8152  | metabolism                                                         | 5.7  | 1.4   | 5.6  | 2.8  | -7.2 | -2.7  | -1.2  |
| AB003151 | B           |        | DNA, chromosome 21q22.2, PAC clone 25P16           | 38172_at                | 8152  | metabolism                                                         | -1.1 | -1.3  | -1.1 | 1.0  | -2.1 | -2.0  | -2.8  |
| U02923   |             |        | glutamine PRPP amidotransferase (GPAT)             | 34341_at                | 8152  | metabolism                                                         | 1.7  | -1.2  | 2.7  | 2.6  | -1.1 | 1.8   | 1.8   |
| AF025887 | B           |        | glutathione S-transferase A4-4 (GSTA4)             | 40509_at                | 8152  | metabolism                                                         | -1.1 | -1.2  | -1.5 | -1.3 | -2.2 | -3.4  | -4.2  |
| AB011004 | A           | luUAP1 | mRNA for UDP-N-acetylglucosamine pyrophosphoryla   | 41242_at                | 8152  | metabolism                                                         | -1.1 | -1.2  | 1.3  | 2.3  | 2.3  | 2.7   | 2.1   |
| J04027   | A           |        | plasma membrane Ca2+ pumping ATPase                | 37661_at                | 8152  | metabolism                                                         | -1.1 | 1.4   | 1.0  | 4.3  | 4.1  | 2.9   | 2.7   |
| Z24724   | A           |        | polyA site DNA                                     | 34857_at                | 8152  | metabolism                                                         | -1.5 | -1.2  | -1.3 | 3.3  | 2.3  | 3.7   | 4.2   |
| X64810   | B           |        | Homo Sapiens encoding PC1/PC3                      | 40849_at                | 8152  | metabolism                                                         | 1.4  | 1.0   | -1.6 | -1.9 | -2.0 | -2.5  | -3.2  |
| X64229   | A           |        | dek                                                | 38992_at                | 8166  | viral replication                                                  | 1.0  | 1.1   | 1.3  | 1.8  | 2.0  | 2.6   | 3.1   |
| X78283   | B           |        | aryl sulfotransferase (ST1A3)                      | 31804_f_at              | 8202  | steroid metabolism                                                 | 1.4  | -1.7  | 1.5  | -1.5 | -1.8 | -1.7  | -2.7  |
| J04813   | B           |        | cytochrome P450 PCN3                               | 37125_f_at              | 8202  | steroid metabolism                                                 | 1.3  | -1.1  | -1.6 | -1.2 | -2.6 | -2.7  | -27.5 |
| J04813   | B           |        | cytochrome P450 PCN3 gene                          | 37124_i_at              | 8202  | steroid metabolism                                                 | 1.9  | 1.0   | -1.8 | -1.4 | -1.5 | -4.3  | -2.9  |
| K02566   |             |        | alpha-2-thiol proteinase inhibitor                 | 37234_at                | 8217  | regulation of blood pressure                                       | 1.2  | 1.4   | 6.9  | 1.8  | 1.1  | -2.8  | -1.9  |
| M25915   | B           |        | complement cytolytic inhibitor (CLI)               | 36780_at                | 8219  | cell death                                                         | 1.0  | -1.1  | 1.0  | -1.8 | -1.7 | -2.1  | -2.7  |
| AJ001014 | B           |        | RAMP1                                              | 35668_at                | 8277  | regulation of G-protein coupled receptor protein signaling pathway | 1.4  | -2.0  | -1.2 | -2.2 | -2.0 | -2.9  | -2.2  |
| X12830   |             |        | interleukin-6 (IL-6) receptor                      | 160032_at               | 8283  | cell proliferation                                                 | -1.2 | -1.5  | -2.6 | -1.2 | 1.0  | -1.2  | 1.2   |
| X58377   | A           |        | adipogenesis inhibitory factor                     | 35464_at                | 8283  | cell proliferation                                                 | 1.0  | -10.1 | 1.0  | 1.7  | 4.8  | 2.0   | 12.8  |
| K03663   |             |        | c-fms proto-oncogene                               | 160022_at               | 8283  | cell proliferation                                                 | -1.5 | -2.1  | -1.3 | -1.5 | -2.0 | -10.7 | -1.2  |
| V00568   |             |        | encoding the c-myc oncogene                        | 1973_s_at               | 8283  | cell proliferation                                                 | 1.0  | 1.0   | 4.4  | 4.9  | 1.5  | 1.3   | 4.5   |
| D30793   | A           |        | epiregulin                                         | 34476_r_at              | 8283  | cell proliferation                                                 | -1.8 | 2.1   | 5.3  | 13.1 | 11.1 | 3.2   | 18.5  |
| AB024704 | A           |        | flt353                                             | 39109_at                | 8283  | cell proliferation                                                 | 1.1  | 1.3   | -1.1 | 1.1  | 2.5  | 4.5   | 6.4   |
| D17793   | B           |        | KIAA0119                                           | 37399_at                | 8283  | cell proliferation                                                 | 1.1  | 1.4   | 1.2  | -1.3 | -1.2 | -1.2  | -3.1  |
| AJ001612 |             |        | L-3-phosphoserine-phosphatase homologue            | 37208_at                | 8283  | cell proliferation                                                 | 1.4  | 1.1   | -1.3 | -1.2 | -3.1 | -2.2  | 2.3   |
| X70340   | A           |        | transforming growth factor alpha                   | 160025_at               | 8283  | cell proliferation                                                 | -1.4 | -1.4  | 1.6  | 3.9  | 3.7  | 4.5   | 8.5   |
| M15796   |             |        | cyclin protein gene                                | 1884_s_at               | 8283  | cell proliferation                                                 | 1.3  | 1.0   | -1.4 | 1.0  | 1.7  | 3.2   | 1.7   |
| U12535   | A           |        | epidermal growth factor receptor kinase substrate  | 1467_at                 | 8283  | cell proliferation                                                 | -1.3 | -1.3  | 1.1  | 2.1  | 1.9  | 3.0   | 4.3   |
| M60828   |             |        | keratinocyte growth factor , complete cds          | 1380_at                 | 8283  | cell proliferation                                                 | 1.2  | -14.5 | 6.4  | -1.4 | -1.5 | -7.3  | -1.9  |
| Z35278   |             |        | PEBP2aC1 acute myeloid leukaemia                   | 106_at                  | 8283  | cell proliferation                                                 | -1.6 | -1.2  | -2.9 | 1.4  | 1.5  | 1.9   | 1.1   |
| J05614   |             |        | proliferating cell nuclear antigen (PCNA)          | 1824_s_at               | 8283  | cell proliferation                                                 | 1.4  | 1.1   | 1.1  | 1.2  | 2.0  | 3.0   | 1.2   |
| M38449   | B           |        | transforming growth factor-beta , complete         | 1830_s_at               | 8283  | cell proliferation                                                 | 1.2  | -1.6  | 1.2  | -1.9 | -1.5 | -2.8  | -1.1  |
| M19154   |             |        | transmng growth factor-beta-2                      | 1262_s_at               | 8283  | cell proliferation                                                 | -1.8 | 1.0   | -1.4 | 1.4  | -1.1 | 1.2   | 2.7   |
| AF024710 | A           |        | vascular endothelial growth factor (VE             | 1953_at                 | 8283  | cell proliferation                                                 | 1.4  | -1.3  | 1.0  | 1.8  | 1.4  | 1.1   | 5.8   |
| U43142   | A           |        | vascular endothelial growth factor related protein | 159_at                  | 8283  | cell proliferation                                                 | 2.7  | -2.3  | -2.0 | 1.3  | 1.5  | 1.2   | 3.3   |
| M30704   | A           |        | amphiregulin (AR)                                  | 34898_at                | 8283  | cell proliferation                                                 | 1.0  | -1.3  | 2.3  | 1.5  | 2.3  | 3.9   | 11.0  |
| X61123   | B           |        | BTG1                                               | 37294_at                | 8283  | cell proliferation                                                 | -1.1 | -1.1  | -1.9 | -1.8 | -2.2 | -2.8  | -1.9  |
| U99151   | A           |        | Cbfp5 homolog (CBF5)                               | 34483_at                | 8283  | cell proliferation                                                 | 1.1  | 1.0   | 1.3  | 2.5  | 2.7  | 1.7   | 1.5   |
| AF055008 | B           |        | clone 24720 epithelin 1 and 2                      | 41198_at                | 8283  | cell proliferation                                                 | 1.4  | -1.2  | -1.3 | -2.5 | -2.0 | -3.1  | -2.1  |
| V00568   | A           |        | c-myc oncogene                                     | 37724_at                | 8283  | cell proliferation                                                 | -1.2 | 1.2   | 2.5  | 2.1  | 1.6  | 1.9   | 3.6   |
| X72841   |             |        | IEF 7442                                           | 41515_at                | 8283  | cell proliferation                                                 | -7.0 | 2.2   | 1.3  | 2.9  | 1.1  | -1.4  | 3.4   |
| AF031167 |             |        | interleukin 15 precursor (IL-15)                   | 38488_s_at              | 8283  | cell proliferation                                                 | -2.9 | -1.6  | -1.5 | -3.8 | -5.8 | -7.0  | 1.3   |
| U63743   | A           |        | mitotic centromere-associated kinesin              | 36837_at                | 8283  | cell proliferation                                                 | 1.6  | 1.4   | -9.6 | -5.2 | 7.6  | 4.9   | 10.9  |
| M24351   | A           |        | parathyroid hormone-like protein                   | 615_s_at                | 8283  | cell proliferation                                                 | -1.5 | -2.0  | -1.2 | 2.6  | 3.9  | 2.8   | 6.1   |
| J03802   | A           |        | renal carcinoma parathgrad hormone-like peptide    | 37989_at                | 8283  | cell proliferation                                                 | 1.1  | 1.6   | -1.9 | 1.4  | 9.1  | 1.1   | 12.8  |
| M74558   | A           |        | SIL                                                | 32767_at                | 8283  | cell proliferation                                                 | 1.4  | 1.3   | 1.9  | 1.4  | 4.9  | 3.9   | 3.9   |
| M26682   |             |        | T-cell translocation gene 1 (Tlg-1)                | 35103_i_at              | 8283  | cell proliferation                                                 | 1.0  | 1.2   | 1.3  | 1.2  | -1.1 | -2.7  | -1.3  |
| M26682   |             |        | T-cell translocation gene 1 (Tlg-1)                | 35104_r_at              | 8283  | cell proliferation                                                 | 1.0  | 1.8   | -2.2 | -1.3 | -2.5 | -1.8  | -1.6  |
| AF022375 | A           |        | vascular endothelial growth factor                 | 36100_at                | 8283  | cell proliferation                                                 | 1.0  | -1.1  | 1.4  | 1.8  | 1.4  | 1.9   | 4.9   |
| M63978   | A           |        | vascular endothelial growth factor gene            | 36101_s_at              | 8283  | cell proliferation                                                 | 2.5  | -1.9  | 2.8  | 2.0  | 2.2  | 1.2   | 18.5  |
| X58377   | A           |        | adipogenesis inhibitory factor                     | 35464_at                | 8284  | positive regulation of cell proliferation                          | 1.0  | -10.1 | 1.0  | 1.7  | 4.8  | 2.0   | 12.8  |
| M60828   |             |        | keratinocyte growth factor , complete cds          | 1380_at                 | 8284  | positive regulation of cell proliferation                          | 1.2  | -14.5 | 6.4  | -1.4 | -1.5 | -7.3  | -1.9  |
| M86699   | A           |        | kinase (TTK) , complete cds                        | 572_at                  | 8284  | positive regulation of cell proliferation                          | 1.7  | 1.2   | -1.5 | 2.5  | 6.0  | 7.2   | 11.3  |
| AF024710 | A           |        | vascular endothelial growth factor (VE             | 1953_at                 | 8284  | positive regulation of cell proliferation                          | 1.4  | -1.3  | 1.0  | 1.8  | 1.4  | 1.1   | 5.8   |
| U43142   | A           |        | vascular endothelial growth factor related protein | 159_at                  | 8284  | positive regulation of cell proliferation                          | 2.7  | -2.3  | -2.0 | 1.3  | 1.5  | 1.2   | 3.3   |
| S78187   | A           |        | CDC25Hu2cdc25a homolog                             | 1347_at                 | 8284  | positive regulation of cell proliferation                          | 1.3  | 1.0   | 1.1  | 1.3  | 1.8  | 2.6   | 3.9   |
| M68520   | A           |        | cdc2-related protein kinase                        | 1792_g_at               | 8284  | positive regulation of cell proliferation                          | -1.1 | 1.3   | 1.5  | 1.5  | 2.1  | 2.6   | 1.4   |
| AF055008 | B           |        | clone 24720 epithelin 1 and 2                      | 41198_at                | 8284  | positive regulation of cell proliferation                          | 1.4  | -1.2  | -1.3 | -2.5 | -2.0 | -3.1  | -2.1  |
| M60278   | A           |        | heparin-binding EGF-like growth factor             | 38037_at                | 8284  | positive regulation of cell proliferation                          | 1.3  | 1.5   | 2.7  | 1.8  | 2.3  | 2.8   | 33.8  |
| AF031167 |             |        | interleukin 15 precursor (IL-15)                   | 38488_s_at              | 8284  | positive regulation of cell proliferation                          | -2.9 | -1.6  | -1.5 | -3.8 | -5.8 | -7.0  | 1.3   |
| M24351   | A           |        | parathyroid hormone-like protein                   | 615_s_at                | 8284  | positive regulation of cell proliferation                          | -1.5 | -2.0  | -1.2 | 2.6  | 3.9  | 2.8   | 6.1   |
| J03802   | A           |        | renal carcinoma parathgrad hormone-like peptide    | 37989_at                | 8284  | positive regulation of cell proliferation                          | 1.1  | 1.6   | -1.9 | 1.4  | 9.1  | 1.1   | 12.8  |
| AF022375 | A           |        | vascular endothelial growth factor                 | 36100_at                | 8284  | positive regulation of cell proliferation                          | 1.0  | -1.1  | 1.4  | 1.8  | 1.4  | 1.9   | 4.9   |
| M63978   | A           |        | vascular endothelial growth factor gene            | 36101_s_at              | 8284  | positive regulation of cell proliferation                          | 2.5  | -1.9  | 2.8  | 2.0  | 2.2  | 1.2   | 18.5  |
| L13698   | B           |        | gas1 gene                                          | 661_at                  | 8285  | negative regulation of cell proliferation                          | 1.1  | 1.3   | -2.2 | -2.1 | -1.5 | -3.7  | -8.6  |
| L25876   | A           |        | protein tyrosine phosphatase (CIP2).               | 1599_at                 | 8285  | negative regulation of cell proliferation                          | 2.0  | 1.0   | -2.4 | -1.8 | 2.1  | 2.6   | 8.1   |
| U03106   |             |        | wild-type p53 activated fragment-1 (WAF1)          | 2031_s_at               | 8285  | negative regulation of cell proliferation                          | 1.0  | -1.2  | -1.4 | -2.8 | -2.1 | -1.5  | -1.2  |
| X61123   | B           |        | BTG1                                               | 37294_at                | 8285  | negative regulation of cell proliferation                          | -1.1 | -1.1  | -1.9 | -1.8 | -2.2 | -2.8  | -1.9  |
| U22398   | B           |        | Cdk-inhibitor p57KIP2 (KIP2)                       | 1787_at                 | 8285  | negative regulation of cell proliferation                          | 1.1  | -1.2  | -1.3 | -3.0 | -4.4 | -9.7  | -4.9  |
| U22398   | B           |        | Cdk-inhibitor p57KIP2 (KIP2)                       | 39545_at                | 8285  | negative regulation of cell proliferation                          | -1.4 | -1.1  | 1.1  | -1.7 | -2.3 | -3.0  | -6.9  |
| AF016582 | B           |        | checkpoint kinase Chk1 (CHK1)                      | 38920_at                | 8285  | negative regulation of cell proliferation                          | -1.3 | -1.4  | 6.2  | 22.1 | 1.2  | 2.0   | 11.9  |
| L13698   | B           |        | gas1 gene                                          | 41839_at                | 8285  | negative regulation of cell proliferation                          | 1.2  | 1.2   | -2.0 | -1.8 | -1.5 | -2.8  | -10.6 |
| M60047   | A           |        | heparin binding protein (HbP17)                    | 38489_at                | 8285  | negative regulation of cell proliferation                          | 1.0  | -1.4  | 1.4  | 1.4  | 1.8  | 3.0   | 2.6   |
| D64137   | B           |        | KIP2 gene Cdk-inhibitor p57KIP2                    | 38673_s_at              | 8285  | negative regulation of cell proliferation                          | 1.2  | 1.0   | -1.2 | -2.8 | -4.0 | -10.0 | -5.0  |
| AF040963 | B           |        | Mad4 homolog (Mad4)                                | 38639_at                | 8285  | negative regulation of cell proliferation                          | -1.2 | -1.2  | 1.3  | -2.2 | -2.1 | -2.3  | -4.6  |

| GenBank       | Group    | Affymetric Gene Annotation                             | Affymatrix Probe set id | GO id       | GO Biological Process                                    | 0           | 4           | 6           | 8           | 12          | 16          | 24           |
|---------------|----------|--------------------------------------------------------|-------------------------|-------------|----------------------------------------------------------|-------------|-------------|-------------|-------------|-------------|-------------|--------------|
| X78534        | B        | NMB                                                    | 38379_at                | 8285        | negative regulation of cell proliferation                | -1.2        | 1.2         | -2.1        | -1.3        | -1.8        | -3.0        | -6.4         |
| M24351        | A        | parathyroid hormone-like protein                       | 615_s_at                | 8285        | negative regulation of cell proliferation                | -1.5        | -2.0        | -1.2        | 2.6         | 3.9         | 2.8         | 6.1          |
| U63809        | A        | prostate apoptosis response protein par-4              | 40621_at                | 8285        | negative regulation of cell proliferation                | -1.1        | -1.2        | 1.0         | 2.7         | 1.5         | 1.5         | 1.9          |
| U63802        | A        | renal carcinoma parathyroid hormone-like peptide       | 37989_at                | 8285        | negative regulation of cell proliferation                | 1.1         | 1.6         | -1.9        | 1.4         | 9.1         | 1.1         | 12.8         |
| AF060228      | B        | retinoic acid receptor responder 3 (RARRES3)           | 33236_at                | 8285        | negative regulation of cell proliferation                | 2.5         | 1.3         | -1.5        | -2.5        | -1.6        | -2.0        | -2.5         |
| D86962        | A        | KIAA0207                                               | 37615_at                | 8286        | insulin receptor signaling pathway                       | 1.1         | 1.8         | -1.4        | 1.2         | 1.3         | 1.2         | 2.9          |
| D88532        | B        | p55pik                                                 | 322_at                  | 8286        | insulin receptor signaling pathway                       | 1.6         | -1.1        | 1.3         | 1.2         | -1.9        | -4.7        | -1.9         |
| D88532        | B        | p55pik_complete cds                                    | 34479_at                | 8286        | insulin receptor signaling pathway                       | 3.0         | 2.0         | 3.7         | -2.1        | -2.0        | -2.6        | -3.9         |
| U90907        | B        | clone 23907                                            | 37991_at                | 8286        | insulin receptor signaling pathway                       | 1.5         | -1.2        | -1.6        | -1.5        | -2.3        | -3.7        | -4.4         |
| AF014402      | B        | type-2 phosphatidic acid phosphatase alpha-1 (PAP2-a1) | 34791_at                | 8354        | germ-cell migration                                      | 2.0         | 1.0         | -3.2        | -2.6        | -3.5        | -3.7        | -4.5         |
| AB011108      | B        | KIAA0536                                               | 32784_at                | 8380        | RNA splicing                                             | 2.8         | -1.2        | -1.4        | 1.5         | 1.0         | 1.0         | 1.0          |
| AF016369      | B        | U4/U6 small nuclear ribonucleoprotein hPrp4            | 37935_at                | 8380        | RNA splicing                                             | 2.6         | 1.2         | 2.5         | 2.4         | 2.2         | 1.1         | 1.2          |
| AF041037      | A        | novel antagonist of FGF signaling (sprouty-1)          | 38767_at                | 8543        | FGF receptor signaling pathway                           | 1.6         | -1.3        | 1.7         | 3.3         | 4.2         | 2.6         | 1.2          |
| M64347        | B        | novel growth factor receptor                           | 31805_at                | 8543        | FGF receptor signaling pathway                           | 1.1         | 1.0         | -1.2        | -1.6        | -2.0        | -1.5        | -3.2         |
| D50840        | B        | ceramide glucosyltransferase                           | 40215_at                | 8544        | epidermal differentiation                                | -1.5        | 1.0         | 1.7         | 2.8         | 2.0         | 1.1         | 2.0          |
| X78947        | A        | connective tissue growth factor                        | 36638_at                | 8544        | epidermal differentiation                                | -1.4        | 1.1         | -1.1        | 3.0         | 4.2         | 2.7         | 4.4          |
| X07696        | B        | <b>cytokeratin 15</b>                                  | <b>37682_at</b>         | <b>8544</b> | <b>epidermal differentiation</b>                         | <b>-1.6</b> | <b>1.1</b>  | <b>1.3</b>  | <b>-1.3</b> | <b>-1.4</b> | <b>-1.7</b> | <b>-6.2</b>  |
| X14640        | B        | <b>keratin 13</b>                                      | <b>36883_at</b>         | <b>8544</b> | <b>epidermal differentiation</b>                         | <b>-1.6</b> | <b>-1.1</b> | <b>1.0</b>  | <b>-1.6</b> | <b>-1.3</b> | <b>-2.3</b> | <b>-6.3</b>  |
| M98776        | B        | <b>keratin 1 gene</b>                                  | <b>558_at</b>           | <b>8544</b> | <b>epidermal differentiation</b>                         | <b>-2.4</b> | <b>1.3</b>  | <b>1.4</b>  | <b>-1.5</b> | <b>-2.0</b> | <b>-5.1</b> | <b>-14.3</b> |
| M60828        | B        | keratinocyte growth factor , complete cds              | 1380_at                 | 8544        | epidermal differentiation                                | 1.2         | -14.5       | 6.4         | -1.4        | -1.5        | -7.3        | -1.9         |
| M97815        | B        | retinoic acid-binding protein II                       | 1057_at                 | 8544        | epidermal differentiation                                | -1.2        | -1.1        | 1.0         | -1.2        | -1.4        | -4.3        | -2.9         |
| AF099731      | B        | connexin 31.1 (GJB5)                                   | 38903_at                | 8544        | epidermal differentiation                                | 1.0         | 1.2         | 2.6         | 1.2         | 1.7         | 1.7         | 1.2          |
| <b>U31201</b> | <b>A</b> | <b>laminin gamma2 chain gene (LAMC2)</b>               | <b>35281_at</b>         | <b>8544</b> | <b>epidermal differentiation</b>                         | <b>1.7</b>  | <b>-1.6</b> | <b>4.5</b>  | <b>1.3</b>  | <b>11.4</b> | <b>4.7</b>  | <b>5.0</b>   |
| <b>U17760</b> | <b>A</b> | <b>laminin S B3 chain (LAMB3)</b>                      | <b>36929_at</b>         | <b>8544</b> | <b>epidermal differentiation</b>                         | <b>1.0</b>  | <b>-1.2</b> | <b>1.1</b>  | <b>1.0</b>  | <b>1.8</b>  | <b>2.2</b>  | <b>4.7</b>   |
| L06419        | B        | lysyl hydroxylase (PLOD)                               | 36184_at                | 8544        | epidermal differentiation                                | -1.4        | -1.4        | -1.7        | -2.6        | -1.1        | 1.2         | 1.1          |
| M24351        | A        | parathyroid hormone-like protein                       | 615_s_at                | 8544        | epidermal differentiation                                | -1.5        | -2.0        | -1.2        | 2.6         | 3.9         | 2.8         | 6.1          |
| U63802        | A        | renal carcinoma parathyroid hormone-like peptide       | 37989_at                | 8544        | epidermal differentiation                                | 1.1         | 1.6         | -1.9        | 1.4         | 9.1         | 1.1         | 12.8         |
| M97815        | B        | retinoic acid-binding protein II (CRABP-II)            | 41783_at                | 8544        | epidermal differentiation                                | -1.7        | -1.3        | 1.0         | -1.7        | -2.7        | -3.5        | -3.0         |
| AF045941      | B        | scieilin (SCEL)                                        | 35105_at                | 8544        | epidermal differentiation                                | -2.6        | 1.0         | 1.1         | 1.5         | 1.6         | 1.1         | 1.4          |
| L33404        | B        | stratum corneum chymotryptic enzyme                    | 38143_at                | 8544        | epidermal differentiation                                | -2.4        | 1.2         | -1.2        | -1.6        | -1.6        | -2.3        | -3.9         |
| Y09392        | B        | WLS-LR, WLS-S1 and WLS-S2 proteins                     | 41189_at                | 8624        | induction of apoptosis by extracellular signals          | -2.0        | -1.6        | -2.8        | 1.1         | 1.2         | 2.9         | 1.4          |
| U19599        | B        | (BAX delta)                                            | 1997_s_at               | 8624        | induction of apoptosis by extracellular signals          | 2.9         | 1.6         | 2.7         | 1.2         | -1.7        | -2.9        | -1.1         |
| L22475        | B        | Bax gamma                                              | 2067_f_at               | 8624        | induction of apoptosis by extracellular signals          | 1.8         | 1.4         | 8.4         | -1.1        | -1.4        | -4.5        | -1.7         |
| L22473        | B        | Bax alpha                                              | 2065_s_at               | 8624        | induction of apoptosis by extracellular signals          | 2.6         | 1.7         | 2.1         | 1.4         | -1.1        | -4.6        | -1.4         |
| AF005775      | B        | caspase-like apoptosis regulatory protein              | 1867_at                 | 8624        | induction of apoptosis by extracellular signals          | 1.2         | 1.4         | 1.7         | 2.6         | 1.6         | 1.0         | 1.7          |
| X78104        | B        | DAP-kinase                                             | 40049_at                | 8624        | induction of apoptosis by extracellular signals          | 1.2         | 1.5         | -1.2        | -2.0        | -1.2        | -1.4        | -2.6         |
| U67156        | A        | mitogen-activated kinase kinase kinase 5 (MAP3KK5)     | 1327_s_at               | 8624        | induction of apoptosis by extracellular signals          | -1.8        | 1.8         | -1.2        | 2.9         | 2.3         | 2.1         | 1.6          |
| <b>U84388</b> | <b>A</b> | <b>death domain containing protein CRADD</b>           | <b>1211_s_at</b>        | <b>8625</b> | <b>induction of apoptosis via death domain receptors</b> | <b>-1.3</b> | <b>1.3</b>  | <b>-1.3</b> | <b>2.7</b>  | <b>1.5</b>  | <b>1.4</b>  | <b>1.4</b>   |
| <b>U03106</b> | <b>A</b> | <b>wild-type p53 activated fragment-1 (WAF1)</b>       | <b>2031_s_at</b>        | <b>8629</b> | <b>induction of apoptosis by intracellular signals</b>   | <b>1.0</b>  | <b>-1.2</b> | <b>-1.4</b> | <b>-2.8</b> | <b>-2.1</b> | <b>-1.5</b> | <b>-1.2</b>  |
| <b>X98172</b> | <b>A</b> | <b>MACH-alpha-1 protein</b>                            | <b>33774_at</b>         | <b>8632</b> | <b>apoptotic program</b>                                 | <b>-1.3</b> | <b>1.2</b>  | <b>1.4</b>  | <b>3.3</b>  | <b>1.7</b>  | <b>2.2</b>  | <b>1.6</b>   |
| U19599        | B        | (BAX delta)                                            | 1997_s_at               | 8634        | negative regulation of survival gene products            | 2.9         | 1.6         | 2.7         | 1.2         | -1.7        | -2.9        | -1.1         |
| L22475        | B        | Bax gamma                                              | 2067_f_at               | 8634        | negative regulation of survival gene products            | 1.8         | 1.4         | 8.4         | -1.1        | -1.4        | -4.5        | -1.7         |
| L22473        | B        | Bax alpha                                              | 2065_s_at               | 8634        | negative regulation of survival gene products            | 2.6         | 1.7         | 2.1         | 1.4         | -1.1        | -4.6        | -1.4         |
| AF079221      | B        | BCL2/adenovirus E1B 19kDa-interacting protein 3a       | 39436_at                | 8634        | negative regulation of survival gene products            | 2.1         | 1.1         | -1.8        | 3.0         | 1.0         | 1.0         | -2.7         |
| Z23115        | B        | bcl-xl                                                 | 1615_at                 | 8634        | negative regulation of survival gene products            | 1.2         | 1.5         | 1.2         | 1.9         | 1.5         | -1.9        | 2.6          |
| U19599        | B        | (BAX delta)                                            | 1997_s_at               | 8637        | apoptotic mitochondrial changes                          | 2.9         | 1.6         | 2.7         | 1.2         | -1.7        | -2.9        | -1.1         |
| L22475        | B        | Bax gamma                                              | 2067_f_at               | 8637        | apoptotic mitochondrial changes                          | 1.8         | 1.4         | 8.4         | -1.1        | -1.4        | -4.5        | -1.7         |
| L22473        | B        | Bax alpha                                              | 2065_s_at               | 8637        | apoptotic mitochondrial changes                          | 2.6         | 1.7         | 2.1         | 1.4         | -1.1        | -4.6        | -1.4         |
| Z23115        | B        | bcl-xl                                                 | 1615_at                 | 8637        | apoptotic mitochondrial changes                          | 1.2         | 1.5         | 1.2         | 1.9         | 1.5         | -1.9        | 2.6          |
| D86960        | A        | KIAA0205                                               | 34387_at                | 8654        | phospholipid biosynthesis                                | 1.2         | 1.3         | -1.5        | 1.8         | 1.9         | 1.8         | 2.9          |
| U65887        | B        | CDP-diacylglycerol synthase                            | 40217_s_at              | 8654        | phospholipid biosynthesis                                | 1.1         | 1.3         | -2.7        | 1.4         | 1.1         | -1.3        | 1.0          |
| D11466        | B        | PIG-A protein                                          | 39993_at                | 9058        | biosynthesis                                             | -1.3        | -1.2        | -2.0        | 1.5         | 2.7         | 1.8         | 1.5          |
| X31573        | B        | sulfite oxidase                                        | 32122_at                | 9087        | methionine catabolism                                    | 1.1         | -1.4        | -1.6        | -1.4        | -1.5        | -2.3        | -3.1         |
| AJ011896      | B        | HIV-1_Nef-associated factor 1 beta                     | 38970_s_at              | 9101        | glycoprotein biosynthesis                                | 1.6         | -2.2        | -2.7        | -7.5        | -3.7        | -2.5        | 1.6          |
| AB005038      | A        | 25-hydroxyvitamin D3 1-alpha-hydroxylase               | 38909_at                | 9110        | vitamin biosynthesis                                     | 1.3         | -1.3        | 1.2         | 2.1         | 3.3         | 1.8         | 3.6          |
| U00238        | A        | glutamine PRPP amidotransferase (GPAT)                 | 34341_at                | 9113        | purine base biosynthesis                                 | 1.7         | -1.3        | 2.7         | 2.6         | -1.1        | 1.8         | 1.8          |
| X90858        | A        | uridine phosphorylase                                  | 37351_at                | 9116        | nucleoside metabolism                                    | 1.0         | -1.2        | -1.1        | 1.4         | 2.5         | 4.6         | 26.2         |
| U00238        | A        | glutamine PRPP amidotransferase (GPAT)                 | 34341_at                | 9116        | nucleoside metabolism                                    | 1.7         | -1.3        | 2.7         | 2.6         | -1.1        | 1.8         | 1.8          |
| X02308        | A        | thymidylate synthase (EC 2.1.1.45)                     | 37899_at                | 9157        | deoxyribonucleoside monophosphate biosynthesis           | 1.3         | 1.2         | -1.5        | 1.2         | 1.2         | 2.1         | 3.5          |
| D00596        | A        | gene thymidylate synthase                              | 1505_at                 | 9157        | deoxyribonucleoside monophosphate biosynthesis           | 1.3         | 1.1         | -1.1        | 1.0         | 1.6         | 2.9         | 3.1          |
| X02308        | A        | thymidylate synthase (EC 2.1.1.45)                     | 37899_at                | 9165        | nucleotide biosynthesis                                  | 1.3         | 1.2         | -1.5        | 1.2         | 1.2         | 2.1         | 3.5          |
| D00596        | A        | gene thymidylate synthase                              | 1505_at                 | 9165        | nucleotide biosynthesis                                  | 1.3         | 1.1         | -1.1        | 1.0         | 1.6         | 2.9         | 3.1          |
| J00140        | A        | dihydrofolate reductase gene                           | 37913_at                | 9165        | nucleotide biosynthesis                                  | 1.5         | -1.1        | 1.0         | -1.3        | 1.0         | 5.9         | 1.8          |
| X55740        | A        | placental cDNA coding 5nucleotidase (EC 3.1.3.5)       | 31866_at                | 9166        | nucleotide catabolism                                    | 1.6         | 1.1         | 1.3         | 2.9         | 5.1         | 5.1         | 8.2          |
| X59618        | A        | RR2 small subunit ribonucleotide reductase             | 36922_at                | 9186        | deoxyribonucleoside diphosphate metabolism               | -1.1        | 1.7         | -2.6        | 1.1         | 2.1         | 3.5         | 4.9          |
| AF038172      | A        | clone 23923 sequence                                   | 35709_at                | 9231        | vitamin B2 biosynthesis                                  | -1.3        | 1.3         | -1.5        | 2.6         | 2.8         | 1.8         | 3.5          |
| AA402332      | B        | zu48h12.s1 cDNA                                        | 39905_i_at              | 9306        | protein secretion                                        | -4.7        | 1.6         | 1.2         | 1.6         | -5.8        | 1.2         | -1.2         |
| X78283        | B        | aryl sulfotransferase (ST1A3)                          | 31804_f_at              | 9308        | amine metabolism                                         | 1.4         | -1.7        | 1.5         | -1.5        | -1.8        | -1.7        | -2.7         |
| X87237        | B        | mRNA for processing a-galucosidase I                   | 38464_at                | 9311        | oligosaccharide metabolism                               | 1.4         | 1.2         | 2.6         | 1.1         | 1.3         | -1.2        | -1.2         |
| X79882        | B        | lrp                                                    | 38064_at                | 9315        | drug resistance                                          | 1.1         | -1.4        | 1.0         | -2.9        | -1.7        | -2.1        | -1.8         |
| M72393        | B        | calcium-dependent phospholipid-binding protein (PLA2)  | 35938_at                | 9395        | phospholipid catabolism                                  | 1.3         | -1.2        | 1.6         | 3.9         | -1.4        | -1.6        | -1.8         |
| X16396        | A        | NAD-dependent methylene tetrahydrofolate dehydrogenase | 40074_at                | 9396        | folic acid and derivative biosynthesis                   | 1.0         | 1.1         | 1.1         | 2.1         | 1.6         | 1.9         | 3.0          |
| <b>V00568</b> | <b>B</b> | <b>encoding the c-myc oncogene</b>                     | <b>1973_s_at</b>        | <b>9405</b> | <b>pathogenesis</b>                                      | <b>1.0</b>  | <b>1.0</b>  | <b>4.4</b>  | <b>1.8</b>  | <b>1.5</b>  | <b>1.3</b>  | <b>4.5</b>   |
| L06797        | B        | (clone L5) orphan G protein-coupled receptor           | 649_s_at                | 9405        | pathogenesis                                             | 1.5         | 1.2         | -1.4        | -1.8        | -1.2        | -1.4        | -2.6         |
| V00568        | A        | <b>c-myc oncogene</b>                                  | <b>37724_at</b>         | <b>9405</b> | <b>pathogenesis</b>                                      | <b>-1.2</b> | <b>1.2</b>  | <b>2.5</b>  | <b>2.1</b>  | <b>1.6</b>  | <b>1.9</b>  | <b>3.6</b>   |
| X64229        | A        | dek                                                    | 36962_at                | 9405        | pathogenesis                                             | 1.0         | 1.1         | 1.3         | 1.8         | 2.0         | 2.6         | 3.1          |
| U18307        | B        | glioma pathogenesis-related protein (GliPR)            | 531_at                  | 9405        | pathogenesis                                             | -1.1        | 1.3         | -2.8        | 1.2         | -1.1        | 1.0         | 1.6          |
| M60278        | A        | heparin-binding EGF-like growth factor                 | 38037_at                | 9405        | pathogenesis                                             | 1.3         | 1.5         | 2.7         | 1.8         | 2.3         | 2.8         | 33.8         |
| X75621        | B        | TSC2 tuberin                                           | 38813_at                | 9405        | pathogenesis                                             | 1.4         | -1.7        | -1.5        | -2.4        | -1.9        | -3.0        | -2.5         |

| GenBank       | Group    | Affymetric Gene Annotation                                           | Affymatrix Probe set id | GO id        | GO Biological Process                                                 | 0          | 4           | 6          | 8           | 12          | 16          | 24          |
|---------------|----------|----------------------------------------------------------------------|-------------------------|--------------|-----------------------------------------------------------------------|------------|-------------|------------|-------------|-------------|-------------|-------------|
| L19872        |          | AH-receptor                                                          | 40516_at                | 9410         | response to xenobiotic stimulus                                       | 1.4        | -1.8        | -1.2       | 1.9         | 1.3         | 1.4         | 3.2         |
| W26407        | B        | 29b8 cDNA                                                            | 33446_at                | 9448         | aminobutyrate metabolism                                              | -1.4       | 1.8         | -1.1       | 1.1         | -1.6        | -2.0        | -9.2        |
| U15085        |          | HLA-DMB                                                              | 41609_at                | 9596         | perception of pest/pathogen/parasite                                  | -1.4       | 1.2         | 1.7        | 1.6         | 1.0         | -2.5        | -2.2        |
| M31682        | B        | testicular inhibin beta-B-subunit                                    | 38545_at                | 9605         | response to external stimulus                                         | -1.3       | -1.1        | -1.2       | -1.2        | -1.6        | -2.0        | -3.7        |
| D14874        |          | adrenomedullin precursor                                             | 34777_at                | 9611         | response to wounding                                                  | -1.5       | 1.1         | -2.7       | -1.4        | -1.2        | -1.3        | -2.2        |
| X78947        | A        | connective tissue growth factor                                      | 36638_at                | 9611         | response to wounding                                                  | -1.4       | 1.1         | -1.1       | 3.0         | 4.2         | 2.7         | 4.4         |
| M60828        |          | keratinocyte growth factor , complete cds                            | 1380_at                 | 9611         | response to wounding                                                  | 1.2        | -14.5       | 6.4        | -1.4        | -1.5        | -7.3        | -1.9        |
| AF041474      |          | BAF53a                                                               | 41278_at                | 9613         | response to pest/pathogen/parasite                                    | 1.1        | 1.6         | -1.7       | 2.7         | 2.0         | 2.2         | 1.8         |
| L42243        |          | (clone 511H) alternatively splice                                    | 1598_at                 | 9615         | response to virus                                                     | 1.2        | -1.3        | -5.5       | -1.3        | -1.3        | 1.3         | 1.7         |
| L06797        | B        | (clone L5) orphan G protein-coupled receptor                         | 649_s_at                | 9615         | response to virus                                                     | 1.5        | 1.2         | -1.4       | -1.8        | -1.2        | -1.4        | -2.6        |
| U19247        | B        | interferon-gamma receptor alpha chain                                | 1038_s_at               | 9615         | response to virus                                                     | -1.2       | 1.0         | -1.2       | 1.5         | -1.4        | -2.2        | -4.0        |
| U05875        | A        | clone pSK1 interferon gamma receptor accessory factor-1 (AF-1)       | 41140_at                | 9615         | response to virus                                                     | -1.1       | 1.1         | 1.7        | 1.9         | 1.7         | 2.2         | 3.4         |
| M57729        |          | complement component C5                                              | 37816_at                | 9618         | response to pathogenic bacteria                                       | 1.3        | 2.4         | -6.0       | -1.5        | -2.5        | -6.8        | 10.7        |
| U19247        | B        | interferon-gamma receptor alpha chain                                | 1038_s_at               | 9619         | resistance to pathogenic bacteria                                     | -1.2       | 1.0         | -1.2       | 1.5         | -1.4        | -2.2        | -4.0        |
| U05875        | A        | clone pSK1 interferon gamma receptor accessory factor-1 (AF-1)       | 41140_at                | 9619         | resistance to pathogenic bacteria                                     | -1.1       | 1.1         | 1.7        | 1.9         | 1.7         | 2.2         | 3.4         |
| L25879        | B        | p53/HEH epoxide hydrolase (EPHX)                                     | 38790_at                | 9636         | response to toxin                                                     | 1.2        | -1.3        | -1.6       | -2.3        | -1.7        | -4.2        | -2.9        |
| AC004770      |          | chromosome 11, BAC CIT-HSP-311e8 (BC269730)                          | 41583_at                | 9650         | UV protection                                                         | 1.3        | 1.3         | 1.1        | 1.2         | 5.9         | 5.6         | 2.9         |
| U05227        | B        | Rar protein                                                          | 555_at                  | 15031        | protein transport                                                     | -1.2       | -1.1        | 1.0        | 1.1         | -1.3        | -1.6        | -5.3        |
| U57093        |          | small GTP-binding protein Rab27b                                     | 808_at                  | 15031        | protein transport                                                     | -1.5       | 1.2         | 1.8        | 1.0         | 5.9         | 10.0        | 1.3         |
| U59877        | A        | low-Mr GTP-binding protein (RAB31)                                   | 33371_s_at              | 15031        | protein transport                                                     | -1.5       | -1.1        | -1.1       | -1.2        | 1.6         | 1.5         | 7.7         |
| AF038007      |          | FIC1                                                                 | 33634_at                | 15721        | bile acid transport                                                   | 1.7        | 1.1         | 1.7        | 1.3         | 1.1         | -2.8        | -2.0        |
| L31801        |          | monocarboxylate transporter 1 (SLC16A1)                              | 36206_at                | 15728        | mevalonate transport                                                  | -1.1       | 1.4         | -2.5       | 2.3         | 3.4         | 2.6         | 1.3         |
| AA978353      |          | oq40b07.s1 cDNA                                                      | 41126_at                | 15804        | neutral amino acid transport                                          | -1.2       | 1.1         | -1.5       | -4.9        | -1.2        | 1.1         | 6.8         |
| D26443        | B        | glutamate transporter                                                | 36009_at                | 15813        | L-glutamate transport                                                 | 1.1        | -1.2        | 1.2        | 1.6         | -1.4        | -1.4        | -2.5        |
| J05069        |          | transcobalamin 1                                                     | 35919_at                | 15889        | vitamin B12 transport                                                 | -2.3       | -1.1        | -10.0      | 1.4         | -1.3        | -1.9        | 1.3         |
| X78706        | B        | carnitine acetyltransferase                                          | 41549_at                | 15990        | energy derivation by oxidation of organic compounds                   | -1.5       | -1.1        | -1.7       | -2.1        | -1.8        | -2.5        | -4.1        |
| M25809        |          | endomembrane proton pump subunit                                     | 32959_at                | 15988        | energy coupled proton transport, against the electrochemical gradient | -1.4       | 1.1         | 1.9        | -1.3        | -1.3        | -2.6        | -2.3        |
| X60221        |          | H+-ATP synthase subunit b                                            | 41228_r_at              | 15992        | proton transport                                                      | 1.4        | 1.0         | -3.5       | 1.1         | 1.4         | 2.0         | -1.5        |
| M25809        |          | endomembrane proton pump subunit                                     | 32959_at                | 15992        | proton transport                                                      | -1.4       | 1.1         | 1.9        | -1.3        | -1.3        | -2.6        | -2.3        |
| U38545        |          | ARF-activated phosphatidylcholine-specific phospholipase             | 177_at                  | 16042        | lipid catabolism                                                      | -1.1       | -1.4        | 1.3        | -1.6        | -3.5        | -2.4        | -2.0        |
| M54994        | B        | bile salt-activated lipase (BAL)                                     | 39176_f_at              | 16042        | lipid catabolism                                                      | 1.4        | -1.7        | -3.8       | -5.2        | -4.5        | -9.1        | -4.9        |
| M72393        |          | calcium-dependent phospholipid-binding protein (PLA2)                | 35938_at                | 16042        | lipid catabolism                                                      | 1.3        | -1.2        | 1.6        | 3.9         | -1.4        | -1.6        | -1.8        |
| M15856        |          | lipoprotein lipase                                                   | 41209_at                | 16042        | lipid catabolism                                                      | -1.4       | 1.0         | -3.5       | -2.0        | 1.5         | -1.5        | 1.0         |
| <b>M38449</b> | <b>B</b> | <b>transforming growth factor-beta , complete cds</b>                | <b>1830_s_at</b>        | <b>16049</b> | <b>cell growth</b>                                                    | <b>1.2</b> | <b>-1.6</b> | <b>1.2</b> | <b>-1.9</b> | <b>-1.5</b> | <b>-2.8</b> | <b>-1.1</b> |
| M19154        |          | transmembrane protein 2                                              | 1262_s_at               | 16049        | cell growth                                                           | -1.8       | 1.0         | -1.4       | 1.4         | -1.1        | 1.2         | 2.7         |
| AA402332      |          | zu48h12.s1 cDNA                                                      | 39905_i_at              | 16192        | vesicle-mediated transport                                            | -4.7       | 1.6         | 1.2        | 1.6         | -5.8        | 1.2         | -1.2        |
| Y15908        |          | dia-12c protein                                                      | 34263_s_at              | 16288        | cytokinesis                                                           | 1.2        | -1.3        | -1.7       | 2.6         | -1.1        | 1.6         | 1.1         |
| X97675        | A        | plakophilin 2a and b                                                 | 33892_at                | 16337        | cell-cell adhesion                                                    | 1.9        | 1.0         | 2.0        | 3.0         | 3.8         | 5.2         | 8.6         |
| AB011141      |          | KIAA0569                                                             | 35681_r_at              | 16481        | negative regulation of transcription                                  | 1.2        | -2.8        | 1.0        | 1.5         | -1.5        | -1.3        | -1.3        |
| AB029036      |          | KIAA1113                                                             | 32635_at                | 16481        | negative regulation of transcription                                  | -1.1       | 1.8         | -6.6       | 3.3         | 1.0         | 2.9         | 2.1         |
| D63881        | A        | KIAA0160                                                             | 40957_at                | 16568        | chromatin modification                                                | 1.3        | 1.1         | -1.2       | 2.3         | 1.7         | 2.6         | 2.7         |
| AB000746      | A        | hMmTRA1b                                                             | 32775_r_at              | 17121        | phospholipid scrambling                                               | 1.2        | 1.0         | -1.7       | 3.3         | 2.1         | 3.0         | 2.2         |
| M08447        |          | keratinocyte transglutaminase gene                                   | 35847_at                | 18149        | peptide cross-linking                                                 | 1.3        | -1.1        | -1.3       | -2.6        | -1.1        | -1.6        | 1.1         |
| L00972        | A        | cystathionine-beta-synthase (CBS)                                    | 38474_at                | 19343        | cysteine biosynthesis via cystathione                                 | -1.5       | 1.0         | 1.6        | 1.4         | -1.1        | 1.1         | 3.7         |
| S52028        |          | cystathionine gamma-lyase (clone HCL-1)                              | 32962_at                | 19344        | cysteine biosynthesis                                                 | 2.5        | -1.5        | 1.9        | -1.6        | 1.4         | 1.2         | 27.6        |
| U77604        | B        | microsomal glutathione S-transferase 2                               | 820_at                  | 19370        | leukotriene biosynthesis                                              | -1.2       | 1.4         | -1.6       | -1.1        | -1.1        | -1.3        | -2.5        |
| X62078        | B        | GM2 activator protein                                                | 35820_at                | 19377        | glycolipid catabolism                                                 | 1.1        | -1.3        | -1.4       | -1.6        | -2.0        | -2.4        | -2.6        |
| X61094        |          | RNA GM2-activator protein (clone pGM2A)                              | 33645_at                | 19377        | glycolipid catabolism                                                 | 2.3        | 1.0         | 1.4        | -1.2        | -1.7        | -1.9        | -2.7        |
| AA224768      | B        | nc12d09.r1 cDNA                                                      | 33647_s_at              | 19377        | glycolipid catabolism                                                 | 1.6        | -1.2        | 1.0        | -1.4        | -2.2        | -3.1        | -3.5        |
| U90441        | B        | prolyl 4-hydroxylase alpha (II) subunit                              | 34390_at                | 19538        | protein metabolism                                                    | -1.1       | 1.3         | -1.5       | -1.5        | -1.4        | -1.4        | -2.7        |
| M24486        | B        | prolyl 4-hydroxylase alpha subunit                                   | 37037_at                | 19538        | protein metabolism                                                    | -1.2       | 1.2         | -1.3       | 1.4         | 1.3         | 1.1         | -2.8        |
| X85750        | A        | transcript associated with monocyte to macrophage differentiation    | 37565_at                | 19835        | cytolysis                                                             | -1.3       | -1.1        | 1.5        | 3.0         | 3.1         | 2.1         | 17.0        |
| M57888        |          | (clone lambda B34) cytotoxic T-lymphocyte-associated serine esterase | 32370_at                | 19835        | cytolysis                                                             | -4.6       | -1.1        | 2.6        | 1.8         | 1.2         | -2.2        | -1.8        |
| M57729        |          | complement component C5                                              | 37816_at                | 19835        | cytolysis                                                             | 1.3        | 2.4         | -6.0       | -1.5        | -2.5        | -6.8        | 10.7        |
| U15085        |          | HLA-DMB                                                              | 41609_at                | 19884        | antigen presentation, exogenous antigen                               | -1.4       | 1.2         | 1.7        | 1.6         | 1.0         | -2.5        | -2.2        |
| U15085        |          | HLA-DMB                                                              | 41609_at                | 19886        | antigen processing, exogenous antigen via MHC class II                | -1.4       | 1.2         | 1.7        | 1.6         | 1.0         | -2.5        | -2.2        |
| AL049758      |          | dJ437M21.3 novel Src homology domain 3                               | 35886_at                | 30036        | actin cytoskeleton organization and biogenesis                        | 1.4        | 1.8         | 4.0        | 1.0         | -2.6        | -2.2        | 1.1         |
| K02566        |          | alpha-2-thiol proteinase inhibitor                                   | 37234_at                | 30146        | diuresis                                                              | 1.2        | 1.4         | 6.9        | 1.8         | 1.1         | -2.8        | -1.9        |
| K02566        |          | alpha-2-thiol proteinase inhibitor                                   | 37234_at                | 30147        | natriuresis                                                           | 1.2        | 1.4         | 6.9        | 1.8         | 1.1         | -2.8        | -1.9        |
| X62078        | B        | GM2 activator protein                                                | 35820_at                | 30149        | sphingolipid catabolism                                               | 1.1        | -1.3        | -1.4       | -1.6        | -2.0        | -2.4        | -2.6        |
| X61094        |          | RNA GM2-activator protein (clone pGM2A)                              | 33645_at                | 30149        | sphingolipid catabolism                                               | 2.3        | 1.0         | 1.4        | -1.2        | -1.7        | -1.9        | -2.7        |
| AA224768      | B        | nc12d09.r1 cDNA                                                      | 33647_s_at              | 30149        | sphingolipid catabolism                                               | 1.6        | -1.2        | 1.0        | -1.4        | -2.2        | -3.1        | -3.5        |
| D87953        | A        | RTP                                                                  | 36933_at                | 30154        | cell differentiation                                                  | -1.1       | 1.0         | 1.1        | -1.1        | 2.9         | 1.8         | 1.5         |
| U78313        |          | myogenic repressor 1-mf (MDFI)                                       | 38156_at                | 30154        | cell differentiation                                                  | 1.0        | 1.3         | 2.8        | 4.1         | 1.4         | 2.0         | 1.6         |
| M31682        | B        | testicular inhibin beta-B-subunit                                    | 38545_at                | 30154        | cell differentiation                                                  | -1.3       | -1.1        | -1.2       | -1.2        | -1.6        | -2.0        | -3.7        |
| AI743134      | A        | wg87f07.x1 cDNA                                                      | 41246_at                | 30162        | regulation of proteolysis and peptidolysis                            | 1.3        | 1.0         | 1.0        | 1.9         | 4.1         | 9.8         | 16.2        |
| X58377        | A        | adipogenesis inhibitory factor                                       | 35464_at                | 30168        | platelet activation                                                   | 1.0        | -10.1       | 1.0        | 1.7         | 4.8         | 2.0         | 12.8        |
| AB006746      | A        | hMmTRA1b                                                             | 32775_r_at              | 30168        | platelet activation                                                   | 1.2        | 1.0         | -1.7       | 3.3         | 2.1         | 3.0         | 2.2         |
| X58377        | A        | adipogenesis inhibitory factor                                       | 35464_at                | 30183        | B-cell differentiation                                                | 1.0        | -10.1       | 1.0        | 1.7         | 4.8         | 2.0         | 12.8        |
| Y15521        |          | ASMTL gene                                                           | 36554_at                | 30187        | melatonin biosynthesis                                                | 1.3        | 1.3         | -2.8       | 1.2         | 1.3         | 1.7         | -1.2        |
| X05610        |          | type IV collagen alpha (2) chain                                     | 36659_at                | 30198        | extracellular matrix organization and biogenesis                      | 2.1        | -1.7        | -1.8       | -2.7        | -1.7        | -1.4        | 1.2         |
| AB002364      |          | KIAA0366                                                             | 36269_at                | 30199        | collagen fibril organization                                          | 2.5        | 1.8         | 1.7        | 1.9         | 7.1         | -21.5       | -1.2        |
| AL031228      |          | dJ1033B10.10 (membrane protein with histidine rich charge clusters)  | 41652_at                | 30199        | collagen fibril organization                                          | 2.4        | 2.9         | 2.2        | 2.3         | 1.4         | 1.1         | -1.3        |
| X58377        | A        | adipogenesis inhibitory factor                                       | 35464_at                | 30219        | megakaryocyte differentiation                                         | 1.0        | -10.1       | 1.0        | 1.7         | 4.8         | 2.0         | 12.8        |
| AF028993      | B        | i-beta-1,3-N-acetylglucosaminyltransferase                           | 33140_at                | 30311        | poly-N-acetyllactosamine biosynthesis                                 | -1.3       | 1.5         | -1.7       | -2.3        | 1.0         | -1.6        | -5.4        |
| AF041037      | A        | novel antagonist of FGF signaling (sprouty-1)                        | 38767_at                | 30324        | lung development                                                      | 1.6        | -1.3        | 1.7        | 3.3         | 4.2         | 2.6         | 1.2         |
| AI743134      | A        | wg87f07.x1 cDNA                                                      | 41246_at                | 30334        | regulation of cell migration                                          | 1.3        | 1.0         | 1.0        | 1.9         | 4.1         | 9.8         | 16.2        |
| M18961        |          | alpha-2-HS-glycoprotein alpha and beta chain                         | 36621_at                | 30500        | regulation of bone mineralization                                     | 1.0        | -1.5        | 1.2        | 2.5         | -2.6        | -1.3        | -1.1        |
| AB002364      |          | KIAA0366                                                             | 36269_at                | 30574        | collagen catabolism                                                   | 2.5        | 1.8         | 1.7        | 1.9         | 7.1         | -21.5       | -1.2        |

| GenBank       |          | Affymetrix                                       |                  |              | Fold Change                                                   |             |             |             |             |             |             |              |
|---------------|----------|--------------------------------------------------|------------------|--------------|---------------------------------------------------------------|-------------|-------------|-------------|-------------|-------------|-------------|--------------|
| Accession #   | Group    | Affymetric Gene Annotation                       | Probe set id     | GO id        | GO Biological Process                                         | 0           | 4           | 6           | 8           | 12          | 16          | 24           |
| L22524        | B        | matrilysin gene                                  | 668_s_at         | 30574        | collagen catabolism                                           | 1.0         | -1.1        | -1.1        | 1.1         | 1.1         | -3.2        | -7.5         |
| M13509        |          | skin collagenase                                 | 38428_at         | 30574        | collagen catabolism                                           | -1.6        | 3.2         | 1.5         | 1.5         | -1.2        | 1.2         | 5.8          |
| D79987        | A        | KIAA0165                                         | 38158_at         | 40001        | mitotic spindle positioning and orientation                   | 1.4         | -1.2        | -1.6        | 1.2         | 2.1         | 1.9         | 4.8          |
| <b>M38449</b> | <b>B</b> | <b>transferring growth factor-beta, complete</b> | <b>1830_s_at</b> | <b>40007</b> | <b>growth</b>                                                 | <b>1.2</b>  | <b>-1.6</b> | <b>1.2</b>  | <b>-1.9</b> | <b>-1.5</b> | <b>-2.8</b> | <b>-1.1</b>  |
| M19154        |          | transferring growth factor-beta-2                | 1262_s_at        | 40007        | growth                                                        | -1.8        | 1.0         | -1.4        | 1.4         | -1.1        | 1.2         | 2.7          |
| M22489        |          | bone morphogenetic protein 2A (BMP-2A)           | 1113_at          | 40007        | growth                                                        | -1.4        | -2.1        | -1.1        | -1.2        | 1.3         | -1.5        | 3.1          |
| M22489        |          | bone morphogenetic protein 2A (BMP-2A)           | 40367_at         | 40007        | growth                                                        | -1.2        | -1.9        | 1.0         | 1.1         | 1.1         | -1.5        | 2.5          |
| M31682        | B        | testicular inhibin beta-B-subunit                | 38545_at         | 40007        | growth                                                        | -1.3        | -1.1        | -1.2        | -1.2        | -1.6        | -2.0        | -3.7         |
| U19523        | A        | GTP cyclohydrolase I                             | 37944_at         | 42133        | neurotransmitter metabolism                                   | -1.2        | 1.2         | 1.1         | 1.8         | 2.9         | 2.1         | 3.5          |
| M68840        | B        | monoamine oxidase A (MAOA)                       | 41772_at         | 42135        | neurotransmitter catabolism                                   | -1.3        | 1.4         | -1.3        | -1.1        | -1.4        | -2.0        | -5.1         |
| W26407        | B        | 2998_cDNA                                        | 33446_at         | 42135        | neurotransmitter catabolism                                   | -1.4        | 1.8         | -1.1        | 1.1         | -1.6        | -2.0        | -9.2         |
| AA420624      | B        | nc61c12.r1 cDNA                                  | 41771_g_at       | 42135        | neurotransmitter catabolism                                   | -1.1        | 1.2         | -1.4        | -1.2        | -1.8        | -2.5        | -4.5         |
| AJ011896      |          | HIV-1 Nef-associated factor 1 beta               | 38970_s_at       | 45071        | negative regulation of viral genome replication               | 1.6         | -2.2        | -2.7        | -7.5        | -3.7        | -2.5        | 1.6          |
| AF082868      | B        | gamma butyrobetaine hydroxylase (BBH)            | 38339_at         | 45329        | caritine biosynthesis                                         | 1.8         | 1.7         | -1.6        | -1.3        | -1.4        | -5.8        | -3.2         |
| X58377        | A        | adipogenesis inhibitory factor                   | 35464_at         | 45444        | adipocyte differentiation                                     | 1.0         | -10.1       | 1.0         | 1.7         | 4.8         | 2.0         | 12.8         |
| <b>U43746</b> | <b>A</b> | <b>breast cancer susceptibility (BRCA2)</b>      | <b>1989_at</b>   | <b>45449</b> | <b>regulation of transcription</b>                            | <b>-2.3</b> | <b>1.3</b>  | <b>1.6</b>  | <b>-1.3</b> | <b>1.6</b>  | <b>3.2</b>  | <b>6.7</b>   |
| AL080076      | B        | DKFZp564C0362                                    | 32668_at         | 45449        | regulation of transcription                                   | 1.0         | 1.3         | -2.8        | -1.3        | -1.8        | -2.5        | -2.5         |
| L13698        | B        | gas1 gene                                        | 661_at           | 45749        | negative regulation of S phase of mitotic cell cycle          | 1.1         | 1.3         | -2.2        | -2.1        | -1.5        | -3.7        | -8.6         |
| <b>L13698</b> | <b>B</b> | <b>gas1 gene</b>                                 | <b>41839_at</b>  | <b>45749</b> | <b>negative regulation of S phase of mitotic cell cycle</b>   | <b>1.2</b>  | <b>1.2</b>  | <b>-2.0</b> | <b>-1.8</b> | <b>-1.5</b> | <b>-2.8</b> | <b>-10.6</b> |
| Y15228        |          | leukemia associated gene 2                       | 39955_at         | 45786        | negative regulation of cell cycle                             | 1.0         | -1.4        | -1.4        | -9.0        | 3.1         | 2.0         | 2.6          |
| M62397        | B        | colorectal mutant cancer protein                 | 1832_at          | 45786        | negative regulation of cell cycle                             | 1.3         | -1.2        | 1.4         | -1.1        | -1.8        | -3.6        | -2.3         |
| <b>U03911</b> | <b>A</b> | <b>mutator gene (hMSH2)</b>                      | <b>860_at</b>    | <b>45786</b> | <b>negative regulation of cell cycle</b>                      | <b>-1.3</b> | <b>1.2</b>  | <b>1.0</b>  | <b>2.0</b>  | <b>3.0</b>  | <b>4.3</b>  | <b>2.2</b>   |
| <b>U22398</b> | <b>B</b> | <b>Cdk-inhibitor p57KIP2 (KIP2)</b>              | <b>1787_at</b>   | <b>45786</b> | <b>negative regulation of cell cycle</b>                      | <b>1.1</b>  | <b>-1.2</b> | <b>-1.3</b> | <b>-3.0</b> | <b>-4.4</b> | <b>-9.7</b> | <b>-4.9</b>  |
| <b>U22398</b> | <b>B</b> | <b>Cdk-inhibitor p57KIP2 (KIP2)</b>              | <b>39545_at</b>  | <b>45786</b> | <b>negative regulation of cell cycle</b>                      | <b>-1.4</b> | <b>1.1</b>  | <b>1.1</b>  | <b>-1.7</b> | <b>-2.3</b> | <b>-3.0</b> | <b>-5.9</b>  |
| M62397        | B        | colorectal mutant cancer protein                 | 35861_at         | 45786        | negative regulation of cell cycle                             | 1.0         | -1.6        | -1.1        | -1.2        | -1.4        | -2.3        | -2.7         |
| D64137        | B        | KIP2 gene Cdk-inhibitor p57KIP2                  | 38873_s_at       | 45786        | negative regulation of cell cycle                             | 1.2         | 1.0         | -1.2        | -2.8        | -4.0        | -10.0       | -5.0         |
| <b>U03911</b> | <b>A</b> | <b>mutator gene (hMSH2)</b>                      | <b>861_g_at</b>  | <b>45786</b> | <b>negative regulation of cell cycle</b>                      | <b>1.1</b>  | <b>-1.3</b> | <b>-1.3</b> | <b>2.1</b>  | <b>1.7</b>  | <b>3.6</b>  | <b>2.2</b>   |
| U28455        | A        | phosphatidylinositol 3-kinase homolog (ATM)      | 2000_at          | 45786        | negative regulation of cell cycle                             | 1.5         | 1.3         | 1.0         | 1.6         | -1.5        | -2.5        | 1.4          |
| X75621        | B        | TSC2 tuberin                                     | 38813_at         | 45786        | negative regulation of cell cycle                             | 1.4         | -1.7        | -1.5        | -2.4        | -1.9        | -3.0        | -2.5         |
| D79987        | A        | KIAA0165                                         | 38158_at         | 45842        | positive regulation of mitotic metaphase/anaphase transition  | 1.4         | -1.2        | -1.6        | 1.2         | 2.1         | 1.9         | 4.8          |
| D79987        | A        | KIAA0165                                         | 38158_at         | 45875        | negative regulation of sister chromatid cohesion              | 1.4         | -1.2        | -1.6        | 1.2         | 2.1         | 1.9         | 4.8          |
| J04809        | B        | cytosolic adenylate kinase (AK1)                 | 36997_at         | 46034        | ATP metabolism                                                | 1.5         | -1.1        | 1.3         | -1.4        | -1.5        | -3.1        | -1.8         |
| M31682        | B        | testicular inhibin beta-B-subunit                | 38545_at         | 46881        | positive regulation of follicle-stimulating hormone secretion | -1.3        | -1.1        | -1.2        | -1.2        | -1.6        | -2.0        | -3.7         |
| M19481        | A        | follicle-stimulating hormone receptor            | 38356_at         | 46882        | negative regulation of follicle-stimulating hormone secretion | 1.6         | -1.3        | 2.0         | 1.6         | -1.5        | 2.1         | 67.5         |
| M31682        | B        | testicular inhibin beta-B-subunit                | 38545_at         | 46882        | negative regulation of follicle-stimulating hormone secretion | -1.3        | -1.1        | -1.2        | -1.2        | -1.6        | -2.0        | -3.7         |
| M31682        | B        | testicular inhibin beta-B-subunit                | 38545_at         | 48178        | negative regulation of hepatocyte growth factor biosynthesis  | -1.3        | -1.1        | -1.2        | -1.2        | -1.6        | -2.0        | -3.7         |
| D21254        |          | OB-cadherin-1                                    | 2087_s_at        | N/A          | N/A                                                           | -5.6        | 1.1         | -1.2        | 4.2         | 7.7         | 1.6         | 2.2          |
| Y13115        | A        | serine/threonine protein ki                      | 975_at           | N/A          | N/A                                                           | 3.5         | -2.2        | -4.0        | 9.4         | 14.1        | 14.2        | 8.8          |
| X83928        |          | transcription factor TFIID                       | 38426_at         | N/A          | N/A                                                           | 6.6         | -1.1        | 1.4         | 1.4         | 1.0         | -1.1        | -1.1         |
| AB028069      | A        | activator of S phase Kinase                      | 31865_at         | N/A          | N/A                                                           | 1.0         | -1.3        | 1.1         | 1.6         | 2.0         | 1.4         | 2.8          |
| D89053        | A        | Acyl-CoA synthetase 3                            | 33880_at         | N/A          | N/A                                                           | 1.2         | 1.4         | -1.2        | 1.7         | 1.2         | 3.0         | 2.3          |
| X84195        | B        | acylphosphatase, muscle type (MT) isoenzyme      | 36321_at         | N/A          | N/A                                                           | -1.4        | -1.6        | -1.5        | -1.4        | -1.7        | -2.7        | -2.1         |
| X15804        | A        | alpha-actinin                                    | 39329_at         | N/A          | N/A                                                           | 1.3         | -1.5        | 1.2         | 2.4         | 3.2         | 2.7         | 2.7          |
| AJ007014      |          | AMMERC1 protein                                  | 32940_at         | N/A          | N/A                                                           | 16.0        | 1.1         | 2.5         | 1.3         | -1.3        | 1.4         | -1.1         |
| AB006909      |          | A-type microphthalmia associated transcription   | 38228_g_at       | N/A          | N/A                                                           | -1.1        | 1.2         | -1.3        | -1.1        | -1.8        | -2.5        | -2.7         |
| D32143        | B        | biliverdin-IXbeta reductase I                    | 37002_at         | N/A          | N/A                                                           | 1.3         | -1.3        | 1.0         | -2.0        | -2.1        | -2.5        | 3.0          |
| D16217        |          | calpastatin                                      | 41257_at         | N/A          | N/A                                                           | -1.3        | 1.6         | -2.8        | 1.0         | 1.3         | 1.7         | 1.0          |
| X56667        |          | calretinin                                       | 37157_at         | N/A          | N/A                                                           | 1.2         | 1.7         | 1.2         | 1.1         | 2.1         | -1.6        | 3.4          |
| D87969        | A        | CMP-sialic acid transporter                      | 37895_at         | N/A          | N/A                                                           | -1.5        | -1.1        | -1.2        | 2.8         | 1.9         | 2.2         | 1.3          |
| AB022718      | A        | DEPP (decidual protein induced by progesterone)  | 39114_at         | N/A          | N/A                                                           | -1.2        | -1.3        | 3.1         | 2.7         | 3.3         | 4.1         | 2.6          |
| AB007447      | B        | Fln29                                            | 35254_at         | N/A          | N/A                                                           | -1.2        | -1.1        | -1.1        | -1.7        | -1.9        | -2.8        | -3.6         |
| D87120        | A        | GS3786                                           | 34321_i_at       | N/A          | N/A                                                           | 1.6         | 1.4         | 2.1         | 3.7         | 3.4         | 3.4         | 3.9          |
| D87120        |          | GS3786                                           | 34322_r_at       | N/A          | N/A                                                           | -2.0        | -1.6        | 7.4         | -1.5        | 1.8         | 2.6         | 1.2          |
| Y17782        | B        | heat shock protein B3                            | 35982_at         | N/A          | N/A                                                           | -1.1        | 1.3         | 1.1         | -6.3        | -16.1       | -6.5        | -40.3        |
| AB000095      | B        | hepatocyte growth factor activator inhibitor     | 33448_at         | N/A          | N/A                                                           | -1.5        | -1.2        | -1.3        | -1.8        | -1.7        | -2.5        | -1.4         |
| X81420        |          | hHKb1 protein                                    | 36288_at         | N/A          | N/A                                                           | 1.3         | -1.3        | 1.0         | -1.4        | -1.3        | 1.1         | 2.9          |
| AJ011972      |          | histone deacetylase-like protein (JM21)          | 35795_at         | N/A          | N/A                                                           | -1.1        | -1.2        | -3.3        | -1.1        | 1.2         | -1.2        | 1.0          |
| AB006537      | A        | interleukin 1 receptor accessory protein         | 38546_at         | N/A          | N/A                                                           | 1.0         | 1.1         | 3.2         | 3.4         | 3.9         | 2.8         | 2.4          |
| D28498        | A        | KIAA0007                                         | 38250_at         | N/A          | N/A                                                           | -1.3        | 1.2         | 1.5         | 1.5         | 1.5         | 2.8         | 1.4          |
| D13635        |          | KIAA0010                                         | 32044_at         | N/A          | N/A                                                           | 1.2         | -1.2        | -3.4        | 2.0         | 1.2         | 1.5         | 1.6          |
| D87717        |          | KIAA0013                                         | 38536_at         | N/A          | N/A                                                           | 1.2         | 9.4         | 2.0         | -2.6        | -1.1        | 3.1         | 3.5          |
| D25216        |          | KIAA0014                                         | 32062_at         | N/A          | N/A                                                           | -2.0        | -1.8        | 2.6         | -1.1        | -1.7        | -3.4        | -2.0         |
| D13645        | A        | KIAA0020                                         | 34765_at         | N/A          | N/A                                                           | 1.1         | 1.1         | 1.3         | 3.6         | 2.0         | 2.9         | 2.2          |
| D28361        | A        | KIAA0042 gene                                    | 34563_at         | N/A          | N/A                                                           | 2.9         | 1.0         | 1.3         | 1.7         | 6.2         | 9.3         | 19.4         |
| D31885        |          | KIAA0069                                         | 36572_r_at       | N/A          | N/A                                                           | -1.2        | 1.7         | -2.6        | 1.9         | 1.5         | 1.7         | 1.4          |
| D42041        | B        | KIAA0088                                         | 37040_at         | N/A          | N/A                                                           | 1.8         | 1.0         | -2.8        | -1.3        | -1.6        | -1.9        | -1.3         |
| D14657        | A        | KIAA0101                                         | 38116_at         | N/A          | N/A                                                           | 1.0         | 1.4         | -1.5        | 1.2         | 1.3         | 4.8         | 3.2          |
| D63480        |          | KIAA0146                                         | 32561_at         | N/A          | N/A                                                           | 2.7         | 1.5         | -1.7        | 1.2         | 1.1         | 1.7         | 1.3          |
| D79983        |          | KIAA0161                                         | 37695_at         | N/A          | N/A                                                           | 1.1         | 8.8         | -2.0        | 7.0         | 1.1         | -2.0        | -1.3         |
| D79986        | A        | KIAA0164                                         | 38050_at         | N/A          | N/A                                                           | -1.2        | 1.2         | -1.3        | 2.8         | 1.3         | 1.7         | 1.1          |
| D80008        |          | KIAA0186                                         | 39677_at         | N/A          | N/A                                                           | -1.1        | 1.3         | -1.5        | 2.1         | 6.4         | 7.0         | 2.6          |
| D86956        | A        | KIAA0201                                         | 34398_at         | N/A          | N/A                                                           | 1.0         | -1.2        | -1.2        | 2.3         | 1.7         | 2.7         | 1.7          |
| D86959        | A        | KIAA0204                                         | 38669_at         | N/A          | N/A                                                           | -1.7        | 1.0         | 1.1         | 1.7         | 2.0         | 3.4         | 2.6          |
| D86978        |          | KIAA0225                                         | 38726_at         | N/A          | N/A                                                           | 1.8         | 1.2         | -2.8        | 1.2         | 1.4         | 1.4         | 1.6          |
| D87682        |          | KIAA0241                                         | 39761_at         | N/A          | N/A                                                           | 1.2         | 1.1         | -2.0        | -1.1        | 1.7         | 3.4         | 1.9          |
| D87462        | B        | KIAA0263                                         | 36154_at         | N/A          | N/A                                                           | 1.5         | -1.9        | -1.4        | -2.8        | -2.2        | -2.6        | -2.1         |
| D87466        | A        | KIAA0276                                         | 35039_at         | N/A          | N/A                                                           | -1.8        | 1.0         | -1.1        | 2.5         | 1.6         | 1.6         | 1.4          |
| AB006624      | A        | KIAA0286                                         | 31832_at         | N/A          | N/A                                                           | 1.3         | 1.5         | 5.2         | 1.1         | 6.5         | 4.1         | 2.5          |
| AB002311      |          | KIAA0313                                         | 32026_s_at       | N/A          | N/A                                                           | 1.1         | 1.7         | -3.0        | 1.7         | 1.4         | 2.1         | 1.1          |



| GenBank     |       |                                                                     | Affymetrix   |       | Fold Change           |      |       |       |      |      |       |      |
|-------------|-------|---------------------------------------------------------------------|--------------|-------|-----------------------|------|-------|-------|------|------|-------|------|
| Accession # | Group | Affymetric Gene Annotation                                          | Probe set id | GO id | GO Biological Process | 0    | 4     | 6     | 8    | 12   | 16    | 24   |
| AB002333    |       | KIAA0335                                                            | 32026_s_at   | N/A   | N/A                   | -2.4 | -1.5  | 1.2   | -1.1 | -3.0 | 1.2   | 1.2  |
| AB002351    |       | KIAA0353                                                            | 39544_at     | N/A   | N/A                   | 1.3  | -3.1  | -2.6  | 1.1  | -1.7 | -3.4  | -2.0 |
| AB002359    |       | KIAA0361                                                            | 37143_s_at   | N/A   | N/A                   | 1.3  | 1.7   | -1.3  | -1.1 | 2.6  | 2.0   | 1.4  |
| AB002375    |       | KIAA0377                                                            | 38196_at     | N/A   | N/A                   | -1.2 | -1.1  | -3.1  | -1.1 | -1.2 | -1.4  | 1.5  |
| AB002384    | B     | KIAA0386                                                            | 37112_at     | N/A   | N/A                   | 1.6  | 1.2   | 1.1   | 1.1  | -1.2 | -1.6  | -2.7 |
| AB007917    |       | KIAA0448                                                            | 40510_at     | N/A   | N/A                   | 3.3  | -1.1  | -1.3  | 3.8  | 1.1  | 2.3   | -1.5 |
| AB007923    | B     | KIAA0454                                                            | 39422_at     | N/A   | N/A                   | 1.2  | 1.4   | -1.7  | -1.3 | -2.0 | -1.9  | -3.4 |
| AB011089    | A     | KIAA0517                                                            | 39382_at     | N/A   | N/A                   | -1.1 | 1.1   | -1.2  | 2.7  | 3.3  | 2.0   | 2.0  |
| AB011126    | B     | KIAA0554                                                            | 30403_at     | N/A   | N/A                   | -1.1 | 1.0   | -1.1  | 1.0  | 1.1  | 1.0   | -2.9 |
| AB011147    | B     | KIAA0575                                                            | 38875_r_at   | N/A   | N/A                   | -1.1 | -1.8  | -1.5  | -1.5 | -1.3 | -3.6  | -5.6 |
| AB011161    | B     | KIAA0589                                                            | 32133_at     | N/A   | N/A                   | 1.7  | -1.5  | -1.1  | -1.9 | -1.2 | -3.4  | -1.6 |
| AB011162    | B     | KIAA0590                                                            | 37437_at     | N/A   | N/A                   | 1.7  | -1.7  | -2.7  | -1.3 | -3.2 | -3.0  | -2.4 |
| AB011167    | A     | KIAA0595                                                            | 31821_at     | N/A   | N/A                   | 1.2  | 1.3   | 2.0   | 1.6  | 2.7  | 1.4   | 1.3  |
| AB011182    |       | KIAA0610                                                            | 39852_at     | N/A   | N/A                   | -1.8 | 1.0   | 1.9   | 3.2  | 1.5  | 1.3   | -1.1 |
| AB014527    |       | KIAA0627                                                            | 38711_at     | N/A   | N/A                   | -1.1 | 1.2   | -2.9  | 2.6  | 2.2  | 3.1   | 1.2  |
| AB014535    |       | KIAA0635                                                            | 38854_at     | N/A   | N/A                   | 1.1  | -1.5  | 1.1   | 2.5  | -1.2 | 3.3   | 1.3  |
| AB014554    |       | KIAA0654 protein                                                    | 41435_at     | N/A   | N/A                   | -1.2 | -1.3  | 1.1   | -1.3 | -1.3 | -2.5  | -1.3 |
| AB014580    |       | KIAA0680                                                            | 41364_r_at   | N/A   | N/A                   | -2.8 | 2.9   | 1.3   | 1.2  | 7.9  | 9.9   | -1.6 |
| AB014610    |       | KIAA0710                                                            | 34801_at     | N/A   | N/A                   | 2.0  | -1.1  | -4.1  | -1.5 | -2.2 | -2.1  | 2.8  |
| AB018255    |       | KIAA0712                                                            | 41455_at     | N/A   | N/A                   | 1.0  | -1.6  | 1.5   | -3.5 | -1.2 | -1.8  | 1.0  |
| AB018259    | A     | KIAA0716                                                            | 41620_at     | N/A   | N/A                   | 1.2  | 1.1   | 1.6   | 1.6  | 2.3  | 4.6   | 3.4  |
| AB018289    |       | KIAA0746                                                            | 41585_at     | N/A   | N/A                   | 1.3  | 1.0   | -3.4  | 1.6  | -1.1 | -1.7  | -1.5 |
| AB020640    |       | KIAA0833                                                            | 39584_at     | N/A   | N/A                   | 1.0  | 8.6   | -2.7  | 12.7 | 1.9  | -11.6 | 1.6  |
| AB020651    | A     | KIAA0844                                                            | 35959_at     | N/A   | N/A                   | -1.4 | 1.4   | 1.4   | 1.7  | 2.4  | 2.7   | 8.7  |
| AB020694    | A     | KIAA0877                                                            | 39021_at     | N/A   | N/A                   | 1.1  | -1.1  | -1.2  | 1.3  | 1.4  | 2.8   | 1.9  |
| AB020685    | B     | KIAA0878                                                            | 32216_r_at   | N/A   | N/A                   | 2.5  | -1.1  | -3.3  | -1.4 | -2.4 | -24.5 | -4.6 |
| AB020685    | B     | KIAA0878                                                            | 32215_l_at   | N/A   | N/A                   | 1.8  | -1.6  | 1.0   | -1.6 | -1.3 | -4.4  | -2.7 |
| AB020689    |       | KIAA0882                                                            | 38254_at     | N/A   | N/A                   | 1.1  | 1.8   | 1.4   | 1.6  | 1.3  | -1.7  | -2.6 |
| AB020699    | B     | KIAA0892                                                            | 36054_at     | N/A   | N/A                   | 1.4  | -2.0  | -4.0  | -1.8 | -2.4 | -2.1  | -1.4 |
| AB020725    | B     | KIAA0918                                                            | 33576_at     | N/A   | N/A                   | 2.2  | 1.3   | -1.1  | -1.1 | 1.0  | -1.6  | -2.9 |
| AB023141    | B     | KIAA0924                                                            | 35878_at     | N/A   | N/A                   | 2.7  | 1.3   | -1.4  | -1.2 | 1.2  | -5.6  | -2.5 |
| AB023158    | A     | KIAA0941                                                            | 32740_at     | N/A   | N/A                   | -1.4 | -1.4  | -1.1  | 1.3  | 1.4  | 1.2   | 3.2  |
| AB023213    |       | KIAA0996                                                            | 36521_at     | N/A   | N/A                   | 1.2  | 1.3   | 1.1   | 3.1  | 2.0  | 1.6   | -1.4 |
| AB028951    |       | KIAA1028                                                            | 39417_at     | N/A   | N/A                   | -1.4 | 1.0   | -7.0  | -1.2 | -1.6 | -1.7  | -1.6 |
| AB028952    | B     | KIAA1029                                                            | 36452_at     | N/A   | N/A                   | -1.2 | 1.1   | -1.2  | -1.6 | -2.0 | -2.4  | -2.9 |
| AB028969    | A     | KIAA1046                                                            | 38778_at     | N/A   | N/A                   | -1.2 | 1.1   | -1.2  | 3.0  | 2.4  | 3.2   | 1.9  |
| AB028974    |       | KIAA1051                                                            | 39696_at     | N/A   | N/A                   | 1.9  | 1.3   | -8.0  | -1.1 | -1.2 | 1.5   | 1.8  |
| AB029001    | A     | KIAA1078                                                            | 34888_at     | N/A   | N/A                   | -1.3 | 1.0   | -1.3  | 1.8  | 1.7  | 2.1   | 2.7  |
| AB029012    | A     | KIAA1089                                                            | 34868_at     | N/A   | N/A                   | 1.6  | 1.2   | -1.1  | 1.7  | 1.5  | 1.2   | 2.6  |
| AB029022    |       | KIAA1099                                                            | 34676_at     | N/A   | N/A                   | 1.7  | 1.5   | -1.4  | 1.0  | 2.1  | 1.6   | -2.9 |
| D86062      | B     | KNP-1b                                                              | 31927_s_at   | N/A   | N/A                   | 1.1  | -1.4  | -1.2  | -2.6 | 2.6  | -2.6  | -1.8 |
| X77196      | B     | lysosome-associated membrane protein-2                              | 38403_at     | N/A   | N/A                   | -1.5 | -1.1  | -1.8  | 1.0  | -1.6 | -1.9  | -2.8 |
| Y14484      | B     | mitochondrial carrier protein ARALAR1                               | 33256_at     | N/A   | N/A                   | -1.1 | -1.4  | -1.1  | -1.2 | -1.1 | -1.8  | -2.6 |
| X98260      | A     | M-phase phosphoprotein, mpp11                                       | 37632_s_at   | N/A   | N/A                   | -1.2 | -1.1  | 1.9   | 5.0  | 1.5  | 2.6   | 2.9  |
| D82326      |       | Na <sup>+</sup> -independent neutral and basic amino acid transport | 39284_at     | N/A   | N/A                   | 3.6  | -1.2  | -3.1  | -1.2 | 2.2  | 3.6   | -1.6 |
| D86519      |       | neuropeptide yepetide YY Y6 receptor                                | 33973_at     | N/A   | N/A                   | -9.0 | 2.4   | -2.7  | -1.6 | 1.9  | -1.9  | 4.7  |
| AJ001258    | B     | NIPSNAP1                                                            | 40866_at     | N/A   | N/A                   | 1.0  | -1.1  | -1.3  | -1.4 | -1.6 | -2.0  | -4.5 |
| D21255      | A     | OB-cadherin-2                                                       | 36976_at     | N/A   | N/A                   | -2.0 | 3.4   | 1.2   | 4.3  | 5.6  | 1.8   | 19.2 |
| AB007448    | A     | OCTN1                                                               | 40391_at     | N/A   | N/A                   | 1.0  | -1.3  | -1.3  | -1.2 | 1.6  | 1.8   | 3.1  |
| Y09631      | A     | PIBF1 protein                                                       | 36012_at     | N/A   | N/A                   | -1.2 | -1.1  | -1.3  | 2.6  | 1.3  | 2.9   | 2.0  |
| AJ005801    |       | protein phosphatase 2C (beta)                                       | 32665_at     | N/A   | N/A                   | 2.0  | 1.2   | -2.7  | 1.5  | 1.3  | -1.4  | 1.9  |
| Y09616      | B     | putative carboxylesterase                                           | 40882_at     | N/A   | N/A                   | -1.3 | -1.7  | -1.2  | -2.3 | -2.2 | -2.9  | -1.7 |
| X00129      | B     | retinol binding protein (RBP)                                       | 32552_at     | N/A   | N/A                   | 3.4  | -1.4  | -8.3  | -1.2 | -1.6 | -3.3  | -4.0 |
| Y18004      |       | SCML2 protein                                                       | 38518_at     | N/A   | N/A                   | -1.2 | 4.7   | -1.3  | 1.7  | 2.0  | 1.9   | 1.1  |
| Y00064      |       | secretogranin I (chromogranin B)                                    | 33426_at     | N/A   | N/A                   | 9.2  | 1.0   | 1.2   | 4.3  | -1.2 | 3.1   | 4.9  |
| AJ132258    |       | staufen protein                                                     | 41823_at     | N/A   | N/A                   | -1.2 | 1.2   | -3.0  | 1.2  | 1.5  | 2.0   | -1.1 |
| X61072      |       | T cell receptor, clone IGRA17                                       | 31556_at     | N/A   | N/A                   | -2.8 | 2.6   | 1.3   | -1.6 | 1.8  | -1.2  | 1.0  |
| AB000584    |       | TGF-beta superfamily protein                                        | 1890_at      | N/A   | N/A                   | 1.1  | 1.0   | 1.3   | -1.2 | -1.3 | -1.2  | 3.2  |
| X82018      |       | ZID protein                                                         | 34562_at     | N/A   | N/A                   | -1.7 | -1.7  | 2.3   | 1.4  | -3.5 | -1.1  | 1.0  |
| Y09538      | B     | ZNF185 gene                                                         | 32139_at     | N/A   | N/A                   | 1.1  | -1.1  | -1.2  | -2.4 | -2.1 | -3.1  | -2.9 |
| X56777      | B     | ZP3 gene                                                            | 39719_at     | N/A   | N/A                   | 1.1  | -1.2  | -2.2  | -1.8 | -1.6 | -3.9  | -1.4 |
| X56777      | B     | ZP3 gene                                                            | 39720_g_at   | N/A   | N/A                   | 1.1  | -1.2  | -2.2  | -1.8 | -1.6 | -3.9  | -1.4 |
| U60519      |       | apoptotic cysteine protease Mch4 (Mch4)                             | 1326_at      | N/A   | N/A                   | -1.6 | 1.7   | 1.4   | -2.7 | 1.3  | -2.1  | 1.0  |
| M15025      |       | BCR/ABL                                                             | 2043_s_at    | N/A   | N/A                   | 1.6  | 5.3   | 1.9   | -1.6 | 1.4  | -1.5  | -1.1 |
| X95152      |       | brca2 gene exon 2 (and joined coding re                             | 1503_at      | N/A   | N/A                   | -1.4 | -1.1  | 10.2  | 1.6  | 2.6  | 1.6   | 4.9  |
| U50535      |       | BRCA2 region, sequence CG006                                        | 1531_at      | N/A   | N/A                   | 1.6  | -2.1  | 1.3   | 4.6  | -1.2 | -1.6  | 1.5  |
| U26710      | B     | cbl-b                                                               | 35632_at     | N/A   | N/A                   | 1.4  | 1.3   | -1.5  | 1.3  | -1.3 | -2.5  | -2.6 |
| U77949      |       | Cdc6-related protein (HsCDC6)                                       | 36839_at     | N/A   | N/A                   | 1.2  | 1.4   | -19.2 | 3.6  | 14.7 | 11.2  | 7.5  |
| C18655      | B     | cDNA, 5' end (clone=GEN-565G08                                      | 33206_at     | N/A   | N/A                   | 1.0  | 1.0   | -1.9  | -1.4 | -3.0 | -3.3  | -2.0 |
| U78556      |       | cisplatin resistance associated alpha protein                       | 1229_at      | N/A   | N/A                   | 1.8  | 1.2   | 1.3   | -2.3 | -1.8 | -1.7  | 3.4  |
| U73379      | A     | cyclin-selective ubiquitin carrier protein                          | 1651_at      | N/A   | N/A                   | 1.4  | 1.0   | 1.2   | -1.1 | 2.5  | 4.3   | 9.2  |
| U28042      | A     | DEAD box RNA helicase-like protein                                  | 831_at       | N/A   | N/A                   | -1.2 | 1.0   | 1.1   | 3.2  | 1.4  | 1.9   | 1.5  |
| J00139      |       | dihydrofolate reductase gene, exon 6 and 3                          | 1610_s_at    | N/A   | N/A                   | 3.9  | 1.0   | 3.6   | 1.4  | 1.1  | 3.6   | 3.8  |
| D85376      |       | DNA thyrotropin-releasing hormone                                   | 750_at       | N/A   | N/A                   | 5.2  | -12.3 | 9.2   | 24.1 | 3.1  | 3.0   | 2.9  |
| X59065      | B     | FGF gene, exon 3                                                    | 396_at       | N/A   | N/A                   | 1.0  | 1.1   | -1.6  | -1.3 | -7.8 | -2.7  | -9.1 |
| AL079286    |       | full length insert cDNA clone EUROIMAGE 26173                       | 38341_at     | N/A   | N/A                   | 1.2  | 2.1   | -3.1  | 2.4  | 1.5  | 1.5   | -1.4 |
| AL079277    |       | full length insert cDNA clone EUROIMAGE 293605                      | 41710_at     | N/A   | N/A                   | -1.8 | -1.1  | 1.2   | 2.6  | 1.4  | 1.2   | 1.8  |
| U55206      | A     | gamma-glutamyl hydrolase (hGH)                                      | 37263_at     | N/A   | N/A                   | 1.2  | 1.2   | -1.4  | 1.8  | 2.2  | 3.3   | 3.3  |
| U15590      | B     | heat shock 17kD protein 3 (HSPB3)                                   | 528_at       | N/A   | N/A                   | 1.0  | -1.1  | -1.2  | -1.5 | -2.3 | -4.1  | -8.5 |

| GenBank       |          |                                                          | Affymetrix      |            |                       |             |             | Fold Change |             |             |             |             |  |  |  |
|---------------|----------|----------------------------------------------------------|-----------------|------------|-----------------------|-------------|-------------|-------------|-------------|-------------|-------------|-------------|--|--|--|
| Accession #   | Group    | Affymetric Gene Annotation                               | Probe set id    | GO id      | GO Biological Process | 0           | 4           | 6           | 8           | 12          | 16          | 24          |  |  |  |
| M11717        |          | heat shock protein (hsp 70)                              | 1104_s_at       | N/A        | N/A                   | 1.6         | -1.3        | 1.5         | 1.3         | 2.6         | 1.7         | -3.3        |  |  |  |
| L19778        |          | histone H2A.1b                                           | 285_g_at        | N/A        | N/A                   | -1.3        | -1.1        | 1.5         | -1.4        | -2.4        | -46.9       | 1.2         |  |  |  |
| M26679        | B        | homeobox protein (HOX-1.3)                               | 873_at          | N/A        | N/A                   | 1.1         | -1.1        | -1.5        | 1.1         | -1.7        | -3.6        | -5.8        |  |  |  |
| <b>M28439</b> | <b>B</b> | <b>keratin type 16 gene, exon 8</b>                      | <b>601_s_at</b> | <b>N/A</b> | <b>N/A</b>            | <b>-1.4</b> | <b>-1.3</b> | <b>1.5</b>  | <b>-1.4</b> | <b>-1.5</b> | <b>-1.7</b> | <b>-2.5</b> |  |  |  |
| L25931        | A        | lamin B receptor (LBR)                                   | 288_s_at        | N/A        | N/A                   | -1.3        | 1.2         | 1.2         | 2.1         | 2.3         | 3.3         | 2.6         |  |  |  |
| L20859        | A        | leukemia virus receptor 1 (GLVR1)                        | 1138_at         | N/A        | N/A                   | -1.2        | 1.0         | 3.3         | 4.0         | 3.5         | 4.1         | 5.4         |  |  |  |
| L07590        | B        | protein phosphatase 2A 130 kDa regulatory subunit        | 930_at          | N/A        | N/A                   | 1.6         | 1.1         | -1.7        | -1.2        | -2.9        | -4.4        | -6.7        |  |  |  |
| M59371        | A        | protein tyrosine kinase                                  | 1379_at         | N/A        | N/A                   | 1.3         | -1.8        | 2.3         | 1.9         | 1.7         | 1.2         | 3.6         |  |  |  |
| L16732        | A        | putative M phase phosphoprotein 1 (MPP1)                 | 282_at          | N/A        | N/A                   | -1.1        | -1.3        | 1.2         | 1.6         | 2.3         | 3.7         | 2.6         |  |  |  |
| U56998        |          | putative serine/threonine protein kinase PRK             | 606_at          | N/A        | N/A                   | 1.0         | 1.4         | 2.4         | 1.4         | 1.3         | 1.0         | 2.9         |  |  |  |
| L14812        |          | retinoblastoma related protein (p107)                    | 1907_at         | N/A        | N/A                   | 3.6         | 2.1         | 6.8         | 2.0         | 1.4         | 1.9         | 3.0         |  |  |  |
| M29960        |          | steroid receptor (TR2-11)                                | 603_at          | N/A        | N/A                   | -1.1        | -1.3        | -1.1        | -1.2        | 1.0         | -2.5        | 1.3         |  |  |  |
| M34057        | A        | transforming growth factor-beta 1 binding protein        | 1495_at         | N/A        | N/A                   | -1.1        | 1.1         | -1.4        | -1.5        | 2.9         | 3.5         | 5.8         |  |  |  |
| M32315        |          | tumor necrosis factor receptor                           | 1583_at         | N/A        | N/A                   | -1.7        | 1.1         | 2.8         | -1.2        | -1.3        | -1.4        | 1.5         |  |  |  |
| U09937        | A        | urokinase-type plasminogen receptor, exon 7              | 189_s_at        | N/A        | N/A                   | -1.1        | -1.3        | 1.6         | 1.4         | 2.0         | 2.7         | 4.4         |  |  |  |
| T53900        |          | yb3e08.r1 cDNA                                           | 40799_at        | N/A        | N/A                   | 2.0         | 7.1         | 12.6        | 2.1         | -1.1        | 2.4         | 1.2         |  |  |  |
| L07633        | B        | (clone 1950.2) interferon-gamma IEF SSP 5111             | 36600_at        | N/A        | N/A                   | 1.1         | 1.1         | -1.5        | -1.2        | -1.7        | -1.2        | -2.6        |  |  |  |
| L40392        |          | (clone S164), 3' end of cds                              | 41208_at        | N/A        | N/A                   | 1.7         | 1.1         | 1.2         | 1.4         | 1.2         | -1.2        | 2.6         |  |  |  |
| J04137        |          | 60-kdal ribonucleoprotein (Ro)                           | 35293_at        | N/A        | N/A                   | 1.2         | 1.8         | -1.2        | 1.8         | 1.5         | 2.9         | -1.1        |  |  |  |
| U37122        |          | adducin gamma subunit                                    | 33103_s_at      | N/A        | N/A                   | 2.1         | -1.3        | 1.5         | -1.1        | -2.8        | -2.1        | -2.5        |  |  |  |
| U37100        | B        | aldose reductase-like peptide                            | 37482_at        | N/A        | N/A                   | -1.2        | 1.1         | -1.5        | -1.1        | -1.6        | -2.3        | -2.7        |  |  |  |
| M26576        |          | alpha-1 collagen type IV gene                            | 39333_at        | N/A        | N/A                   | 14.4        | 1.0         | -1.7        | -2.0        | 1.5         | 1.2         | 1.5         |  |  |  |
| M29877        | A        | alpha-L-fucosidase                                       | 41814_at        | N/A        | N/A                   | 2.2         | -1.2        | 1.5         | 1.5         | 1.9         | 1.5         | 2.8         |  |  |  |
| D90070        | A        | ATL-derived PMA-responsive (APR) peptide                 | 41048_at        | N/A        | N/A                   | 1.0         | 1.3         | 2.1         | 2.7         | 1.0         | 2.2         | 11.7        |  |  |  |
| U94319        |          | autoantigen DF570                                        | 39243_s_at      | N/A        | N/A                   | 1.1         | 1.4         | -1.7        | 2.0         | 3.6         | 3.6         | 2.5         |  |  |  |
| U03105        | B        | B4-2 protein                                             | 36890_at        | N/A        | N/A                   | 1.0         | -1.3        | 1.0         | -2.0        | -3.1        | -3.9        | -1.7        |  |  |  |
| AF089862      |          | BAC clone 157K21 from 8q21                               | 36570_at        | N/A        | N/A                   | -2.7        | 1.1         | 1.0         | 1.2         | -1.1        | -2.0        | -1.7        |  |  |  |
| AC004010      | A        | BAC clone GS09H08                                        | 32919_at        | N/A        | N/A                   | 1.7         | 1.1         | 3.2         | 2.0         | 2.0         | 3.1         | 3.0         |  |  |  |
| AC005053      | A        | BAC clone RG041D11 from 7q21                             | 40297_at        | N/A        | N/A                   | -1.2        | -1.1        | 1.6         | 2.4         | 1.6         | 1.3         | 4.6         |  |  |  |
| AF068197      | B        | BCE-1                                                    | 38364_at        | N/A        | N/A                   | -1.3        | 1.5         | -2.1        | -1.9        | -1.4        | 1.0         | -2.5        |  |  |  |
| U17077        | A        | BENE                                                     | 33331_at        | N/A        | N/A                   | -2.4        | -1.2        | 1.1         | 1.5         | 2.5         | 2.6         | 2.9         |  |  |  |
| M34175        | B        | beta adaptin                                             | 36161_at        | N/A        | N/A                   | 1.4         | -1.1        | -1.6        | -1.4        | -1.4        | -2.6        | -1.1        |  |  |  |
| X75940        |          | beta glucuronidase pseudogene                            | 41642_at        | N/A        | N/A                   | 1.6         | 1.2         | -1.5        | 3.2         | 2.6         | 1.0         | 1.0         |  |  |  |
| M34423        | B        | beta-galactosidase (GLB1)                                | 37742_at        | N/A        | N/A                   | 1.4         | -1.3        | -1.4        | -1.7        | -1.8        | -3.0        | -1.8        |  |  |  |
| U90030        | A        | bicaudal-D (BICD) , alternatively spliced                | 32127_at        | N/A        | N/A                   | 1.4         | 1.0         | 6.3         | 1.6         | 8.2         | 1.0         | 2.8         |  |  |  |
| M57951        | B        | bilirubin UDP-glucuronosyltransferase isozyme 2          | 32392_s_at      | N/A        | N/A                   | 1.0         | 1.2         | -1.5        | -1.4        | -1.6        | -2.0        | -3.3        |  |  |  |
| <b>U76638</b> | <b>A</b> | <b>BRCA1-associated RING domain protein (BARD1)</b>      | <b>1801_at</b>  | <b>N/A</b> | <b>N/A</b>            | <b>-1.1</b> | <b>3.3</b>  | <b>-1.3</b> | <b>1.6</b>  | <b>2.8</b>  | <b>3.5</b>  | <b>4.6</b>  |  |  |  |
| <b>U50529</b> | <b>B</b> | <b>BRCA2 region, sequence CG016</b>                      | <b>34459_at</b> | <b>N/A</b> | <b>N/A</b>            | <b>-1.2</b> | <b>1.2</b>  | <b>2.8</b>  | <b>1.5</b>  | <b>-1.4</b> | <b>-1.4</b> | <b>1.3</b>  |  |  |  |
| U90548        | B        | butyrophilin (BTF3)                                      | 38241_at        | N/A        | N/A                   | 1.4         | -1.1        | -1.6        | -1.4        | -1.7        | -4.8        | -2.9        |  |  |  |
| U72515        | B        | C3f                                                      | 33710_at        | N/A        | N/A                   | 1.1         | 1.2         | -3.0        | -1.7        | -1.5        | -2.2        | -4.0        |  |  |  |
| U61538        |          | calcium-binding protein chp                              | 35018_at        | N/A        | N/A                   | 1.1         | 1.1         | 2.9         | 1.0         | -1.1        | -1.4        | -1.9        |  |  |  |
| U28710        | B        | cd4-b                                                    | 514_at          | N/A        | N/A                   | 1.0         | 1.8         | -2.8        | 1.1         | -1.6        | -3.4        | -3.0        |  |  |  |
| AF039917      |          | CD39L3 (CD39L3)                                          | 39974_at        | N/A        | N/A                   | -1.7        | 1.4         | 2.0         | -12.5       | -2.3        | -2.4        | -3.5        |  |  |  |
| U77949        | A        | Cdc6-related protein (HsCDC6)                            | 1536_at         | N/A        | N/A                   | -1.2        | -1.2        | -1.8        | 5.5         | 3.5         | 4.1         | 4.5         |  |  |  |
| AB007962      |          | chromosome 1 specific transcript KIAA0493                | 33762_r_at      | N/A        | N/A                   | -3.3        | -1.2        | -3.4        | 1.6         | 1.0         | -1.3        | -1.2        |  |  |  |
| U47924        | B        | chromosome 12p13 sequence                                | 34003_at        | N/A        | N/A                   | 1.6         | -1.8        | -2.6        | -2.2        | -1.6        | -2.0        | 1.1         |  |  |  |
| AC002045      |          | Chromosome 16 BAC clone CIT987SK-A-589H1                 | 33836_at        | N/A        | N/A                   | 1.3         | 1.1         | 2.1         | 1.3         | 1.0         | -5.3        | 2.0         |  |  |  |
| AC004076      |          | chromosome 19, cosmid R30217                             | 31336_at        | N/A        | N/A                   | 2.5         | 5.3         | 1.1         | 30.4        | 2.7         | 3.8         | 2.7         |  |  |  |
| AC005781      |          | chromosome 19, cosmid R33632                             | 32486_at        | N/A        | N/A                   | 2.0         | -1.4        | 1.2         | -1.8        | 4.1         | -1.4        | -3.4        |  |  |  |
| U78556        | A        | cisplatin resistance associated alpha protein            | 1230_g_at       | N/A        | N/A                   | 1.2         | -1.3        | 1.1         | -1.6        | 1.6         | 1.7         | 3.0         |  |  |  |
| M61199        | A        | cleavage signal 1 protein                                | 38409_at        | N/A        | N/A                   | -1.5        | -1.3        | 1.1         | 1.7         | -1.1        | 1.8         | 2.7         |  |  |  |
| U92014        |          | clone 121711 defective mariner transposon Hsma2 sequence | 38241_at        | N/A        | N/A                   | 1.0         | -2.5        | -5.4        | 1.5         | -1.1        | 1.6         | 4.5         |  |  |  |
| U79289        |          | clone 23695 sequence                                     | 37060_at        | N/A        | N/A                   | -2.4        | 1.1         | -2.7        | 1.7         | 3.7         | -7.3        | 4.5         |  |  |  |
| AF035282      | B        | clone 23703 sequence                                     | 41679_at        | N/A        | N/A                   | 1.1         | 2.5         | -3.0        | -1.7        | -2.5        | -3.3        | -22.4       |  |  |  |
| U79256        | A        | clone 23719 sequence                                     | 37577_at        | N/A        | N/A                   | -1.4        | -1.1        | -1.2        | 1.2         | 1.8         | 1.8         | 3.7         |  |  |  |
| U79272        |          | clone 23720 sequence                                     | 37891_at        | N/A        | N/A                   | 1.6         | 3.9         | -2.1        | 1.7         | 1.3         | 1.6         | -1.3        |  |  |  |
| AF007130      |          | clone 23750 unknown                                      | 37819_at        | N/A        | N/A                   | -1.1        | 1.7         | -1.6        | 2.7         | 1.0         | 1.1         | -2.0        |  |  |  |
| U79263        | A        | clone 23760                                              | 32954_at        | N/A        | N/A                   | 2.1         | -1.2        | 1.6         | 3.1         | 2.3         | 3.5         | 2.5         |  |  |  |
| U79267        | A        | clone 23840                                              | 34371_at        | N/A        | N/A                   | -1.1        | 1.2         | 1.2         | 1.7         | 1.7         | 1.7         | 2.7         |  |  |  |
| AF039182      | A        | clone 23860 sequence                                     | 33466_at        | N/A        | N/A                   | -1.2        | -1.6        | 1.5         | 3.0         | 1.9         | 2.6         | 1.4         |  |  |  |
| AF052102      | A        | clone 23926 sequence                                     | 41808_at        | N/A        | N/A                   | 1.2         | -1.4        | 1.1         | 1.9         | 1.7         | 1.7         | 2.8         |  |  |  |
| AF070559      | A        | clone 24463 sequence                                     | 41860_at        | N/A        | N/A                   | -1.3        | -1.2        | -1.1        | 2.0         | 1.5         | 3.3         | 3.6         |  |  |  |
| AF052187      |          | clone 24511                                              | 41693_r_at      | N/A        | N/A                   | 1.2         | -4.0        | 1.6         | 3.1         | -2.6        | -1.4        | -2.6        |  |  |  |
| AF052178      | A        | clone 24523 sequence                                     | 40802_at        | N/A        | N/A                   | 2.0         | 1.4         | 1.7         | 2.5         | 2.6         | 2.4         | 2.9         |  |  |  |
| AF070595      |          | clone 24583                                              | 38170_at        | N/A        | N/A                   | -1.7        | 6.4         | 1.5         | 1.7         | 3.3         | 1.2         | -9.8        |  |  |  |
| AF070618      |          | clone 24627 sequence                                     | 31799_at        | N/A        | N/A                   | -1.5        | -1.3        | -1.2        | -2.4        | 1.8         | -2.3        | -2.8        |  |  |  |
| AF070620      |          | clone 24694 sequence                                     | 33886_at        | N/A        | N/A                   | 1.0         | -1.2        | -1.2        | 3.5         | -1.1        | -1.5        | 1.5         |  |  |  |
| AF070614      |          | clone 24732 unknown                                      | 36536_at        | N/A        | N/A                   | 1.2         | 1.8         | -1.7        | 2.3         | 1.8         | 3.3         | 2.7         |  |  |  |
| AF070596      | B        | clone 24796 sequence                                     | 35198_at        | N/A        | N/A                   | -2.0        | 1.5         | 1.3         | -1.4        | 1.1         | -1.3        | -12.2       |  |  |  |
| AF070617      | B        | clone 24812 sequence                                     | 35142_at        | N/A        | N/A                   | -1.2        | 1.4         | 1.1         | 1.2         | -1.1        | -1.4        | -2.6        |  |  |  |
| AF090102      |          | clone IMAGE 21785                                        | 39527_at        | N/A        | N/A                   | 1.4         | 1.2         | -3.0        | 1.6         | -1.3        | 1.7         | -1.8        |  |  |  |
| U82319        |          | clone YDD19 sequence                                     | 37079_at        | N/A        | N/A                   | 1.7         | 1.3         | -1.4        | 2.8         | 1.7         | 1.4         | 1.7         |  |  |  |
| M13666        | A        | c-myc                                                    | 41854_at        | N/A        | N/A                   | -1.6        | -1.5        | 1.1         | 1.8         | -1.3        | -3.6        | 1.3         |  |  |  |
| AF063308      |          | coiled-coil related protein DEPEST (DEPEST) , com        | 32120_at        | N/A        | N/A                   | 1.9         | -1.5        | -1.6        | -2.0        | 1.5         | 2.2         | 5.2         |  |  |  |
| Z21488        |          | contactin                                                | 31809_at        | N/A        | N/A                   | 1.5         | 1.3         | -24.6       | 1.6         | -1.4        | 1.2         | -2.5        |  |  |  |
| U04636        | A        | cyclooxygenase-2 (Cox-2) gene, complete cd               | 1069_at         | N/A        | N/A                   | 1.7         | -1.6        | 1.8         | 14.3        | 3.1         | 4.5         | 4.3         |  |  |  |
| AF046059      |          | cytokine receptor related protein 4 (CYTOR4)             | 37509_at        | N/A        | N/A                   | 1.0         | 1.2         | 1.4         | 2.5         | 2.0         | 1.5         | 1.4         |  |  |  |
| L40377        | A        | cytoplasmic antipeptidase 2 (CAP2)                       | 36312_at        | N/A        | N/A                   | 1.2         | 1.9         | 1.5         | 1.7         | 2.0         | 3.1         | 3.9         |  |  |  |
| M31516        | A        | decay-accelerating factor                                | 39895_at        | N/A        | N/A                   | -1.2        | 1.3         | 1.3         | 2.0         | 1.5         | 1.4         | 3.8         |  |  |  |

| GenBank | Accession # | Group | Affymetric Gene Annotation                                  | Affymetric Probe set id | GO id | GO Biological Process | 0    | 4    | 6    | 8    | 12   | 16   | 24    |
|---------|-------------|-------|-------------------------------------------------------------|-------------------------|-------|-----------------------|------|------|------|------|------|------|-------|
|         | J00146      |       | dihydrofolate reductase pseudogene (psi-hd1)                | 31479_f_at              | N/A   | N/A                   | -2.3 | -1.2 | -2.0 | -2.3 | -1.8 | 3.0  | 1.9   |
|         | AL050259    |       | DKF Zp547D0710                                              | 40521_at                | N/A   | N/A                   | 1.0  | -2.5 | -1.9 | -2.1 | -1.9 | -1.6 | 1.4   |
|         | AL080060    |       | DKF Zp564H172                                               | 35881_at                | N/A   | N/A                   | 2.5  | -2.8 | 2.1  | 1.2  | -1.3 | -1.7 | -1.1  |
|         | AL050274    | B     | DKF Zp566C243                                               | 38697_at                | N/A   | N/A                   | 1.7  | -1.6 | -2.5 | -2.6 | -2.4 | -2.1 | -1.3  |
|         | AL080232    |       | DKF Zp586A061                                               | 34117_at                | N/A   | N/A                   | 4.3  | -2.4 | -1.7 | 4.6  | 1.4  | 1.5  | -3.6  |
|         | AL050199    |       | DKF Zp586D0923                                              | 39282_at                | N/A   | N/A                   | -3.1 | -2.0 | 1.3  | 2.9  | -2.0 | 1.8  | 1.3   |
|         | AL096842    | B     | DKF Zp586D1519                                              | 38013_at                | N/A   | N/A                   | 1.2  | -1.1 | -3.3 | -1.1 | -1.7 | -1.8 | -2.1  |
|         | AL050290    | A     | DKF Zp586G1923                                              | 34304_s_at              | N/A   | N/A                   | 1.0  | 1.1  | 1.0  | 1.2  | 1.2  | 3.4  | 5.2   |
|         | AD000694    | B     | DNA from chromosome 19-cosmid F30879 containing USF2        | 38324_at                | N/A   | N/A                   | 1.1  | 1.0  | -2.2 | -1.6 | -1.1 | -3.0 | -1.9  |
|         | AL022395    |       | DNA sequence from clone 273N12 on chromosome 8q16.1-16.3    | 39887_at                | N/A   | N/A                   | -2.3 | 1.6  | 1.3  | 3.4  | 1.3  | 1.4  | 6.2   |
|         | AL031178    | B     | DNA sequence from clone 341E18 on chromosome 6p11.2-12.3    | 38990_at                | N/A   | N/A                   | 1.4  | -1.3 | -1.1 | -1.1 | -1.5 | -1.8 | -3.1  |
|         | Z97054      |       | DNA sequence from PAC 339A18 on chromosome Xp11.2           | 34373_at                | N/A   | N/A                   | -1.3 | -1.2 | 1.5  | -2.9 | -1.6 | -2.6 | 1.2   |
|         | M27826      | A     | endogenous retroviral protease                              | 34702_f_at              | N/A   | N/A                   | 1.5  | -1.1 | 1.1  | -2.4 | 1.2  | 2.5  | 4.7   |
|         | U80770      |       | EST clone 251800 mariner transposon Hsmar1 sequence         | 31771_at                | N/A   | N/A                   | -1.9 | 1.0  | 1.0  | 1.3  | -4.6 | -4.0 | -3.0  |
|         | M82827      | B     | fusion protein                                              | 38788_at                | N/A   | N/A                   | 1.6  | -2.2 | -1.3 | -4.3 | -1.7 | -2.3 | -3.6  |
|         | M68891      | B     | GATA-binding protein (GATA2)                                | 37194_at                | N/A   | N/A                   | 1.1  | 1.1  | -1.3 | 1.1  | -1.1 | 1.2  | -2.6  |
|         | X14487      | B     | gene acidic (type I) cytokeratin 10                         | 38610_s_at              | N/A   | N/A                   | -2.3 | -1.2 | 1.1  | -1.3 | -1.4 | -1.8 | -3.9  |
|         | X68733      | B     | gene alpha 1-antichymotrypsin, exon 1                       | 33825_at                | N/A   | N/A                   | 1.0  | 1.0  | 1.5  | -1.2 | -1.6 | -2.3 | -3.3  |
|         | X05608      | B     | gene neurofilament subunit NF-L                             | 40995_at                | N/A   | N/A                   | -1.4 | 1.4  | -1.5 | -1.4 | 1.2  | -1.3 | -2.9  |
|         | AL035304    | B     | gene from PAC 295C6, similar to rat PO44                    | 37000_at                | N/A   | N/A                   | 1.5  | 1.1  | 1.0  | -1.2 | -1.9 | -2.2 | -2.8  |
|         | M55531      | B     | glucose transport-like 5 (GLUT5)                            | 34362_at                | N/A   | N/A                   | 1.3  | 1.0  | -1.7 | -1.7 | -1.9 | -4.6 | -11.5 |
|         | L38933      | A     | GT198                                                       | 32577_s_at              | N/A   | N/A                   | -1.1 | 1.4  | 1.1  | 1.0  | 1.5  | 1.9  | 2.7   |
|         | U41387      | A     | Gu protein                                                  | 40490_at                | N/A   | N/A                   | -1.6 | 1.1  | 1.2  | 3.6  | 2.6  | 3.4  | 2.4   |
|         | L22075      |       | guanine nucleotide regulatory protein (G13)                 | 33635_at                | N/A   | N/A                   | 1.1  | 1.1  | 2.1  | 8.1  | -1.1 | -1.6 | 2.0   |
|         | L22075      |       | guanine nucleotide regulatory protein (G13)                 | 1139_at                 | N/A   | N/A                   | 3.9  | -1.5 | 2.7  | 1.3  | -1.4 | 1.8  | 1.5   |
|         | Z80779      | B     | H2B19                                                       | 31822_f_at              | N/A   | N/A                   | -1.3 | 1.0  | 1.3  | -1.3 | -1.3 | -1.9 | -4.2  |
|         | AB029343    |       | HCR (a-helix coiled-coil rod homologue)                     | 37425_g_at              | N/A   | N/A                   | 1.1  | 1.2  | -1.3 | -2.7 | -1.4 | -1.5 | 1.2   |
|         | X51767      |       | heat-shock protein HSP70B                                   | 35865_at                | N/A   | N/A                   | -4.5 | -2.2 | 1.0  | 1.7  | 2.5  | 1.2  | 1.2   |
|         | M85289      | B     | heparan sulfate proteoglycan (HSPG2)                        | 32845_at                | N/A   | N/A                   | 1.4  | -1.4 | -1.3 | -3.5 | -2.1 | -3.7 | -4.4  |
|         | L19779      | B     | histone H2A.2                                               | 286_at                  | N/A   | N/A                   | -1.5 | 1.3  | 1.1  | -1.2 | -1.3 | -1.7 | -3.5  |
|         | U75679      | A     | histone stem-loop binding protein (SLBP)                    | 36913_at                | N/A   | N/A                   | -1.2 | 1.4  | -1.3 | 2.3  | 1.6  | 4.6  | 2.6   |
|         | Z46376      | A     | HK2 hexokinase II                                           | 40964_at                | N/A   | N/A                   | 1.7  | 1.0  | 4.4  | 1.6  | 4.7  | 2.9  | 3.4   |
|         | J04599      | B     | hPGI encoding bone small proteoglycan I (biglycan)          | 38126_at                | N/A   | N/A                   | -1.4 | 1.3  | 1.1  | -1.4 | -1.2 | -1.9 | -3.5  |
|         | AB015344    | B     | HRHFB2157                                                   | 34824_at                | N/A   | N/A                   | 1.2  | -1.1 | -3.1 | -1.5 | -1.4 | -2.4 | -1.3  |
|         | U60644      | B     | HU-K4                                                       | 36151_at                | N/A   | N/A                   | 1.6  | -1.1 | -1.1 | -1.8 | -1.4 | -3.6 | -2.1  |
|         | Y12059      |       | HUNK1                                                       | 39093_s_at              | N/A   | N/A                   | -1.5 | 1.5  | 1.6  | -1.4 | -1.4 | -3.8 | 1.6   |
|         | U92315      | A     | hydroxysteroid sulfotransferase SULT2B1b (HSST2)            | 41034_s_at              | N/A   | N/A                   | -1.4 | -1.3 | 1.1  | 1.2  | 1.7  | 1.4  | 2.8   |
|         | X78932      | B     | HZF9 zinc finger protein                                    | 35026_f_at              | N/A   | N/A                   | 1.5  | -1.4 | -3.5 | 1.1  | -1.6 | -4.1 | 1.8   |
|         | L20826      | A     | I-plastin                                                   | 39951_at                | N/A   | N/A                   | 1.2  | 1.2  | -1.3 | 1.9  | 2.5  | 2.1  | 1.6   |
|         | AF070523    | B     | JWA protein                                                 | 39091_at                | N/A   | N/A                   | 1.0  | 1.3  | -1.4 | 1.1  | -1.2 | 1.1  | -3.4  |
|         | AB007870    | A     | KIAA0410                                                    | 40018_at                | N/A   | N/A                   | -1.6 | 1.0  | -1.2 | 4.4  | 1.7  | 2.5  | 18.6  |
|         | AB007871    | B     | KIAA0411                                                    | 37863_at                | N/A   | N/A                   | 1.0  | 1.2  | -1.4 | -1.1 | -1.3 | -1.5 | -4.2  |
|         | AB007881    |       | KIAA0421                                                    | 32637_f_at              | N/A   | N/A                   | -9.2 | -1.1 | -8.9 | 2.8  | -8.5 | 1.1  | 10.0  |
|         | AB007893    | A     | KIAA0433                                                    | 35167_at                | N/A   | N/A                   | -1.5 | -1.9 | -1.4 | 2.9  | 1.6  | 1.6  | 1.1   |
|         | AB007895    |       | KIAA0435                                                    | 39650_s_at              | N/A   | N/A                   | -1.7 | 1.0  | 3.5  | -1.6 | 1.1  | -1.2 | 1.1   |
|         | U56816      |       | kinase Myt1 (Myt1)                                          | 480_at                  | N/A   | N/A                   | 1.0  | 1.0  | 1.5  | -2.2 | 1.2  | 1.1  | 3.5   |
|         | AF001461    | A     | Kruppel-like zinc finger protein Z19                        | 37026_at                | N/A   | N/A                   | -1.3 | 1.1  | 1.4  | 1.9  | 1.6  | 2.8  | 3.4   |
|         | AF023676    | B     | lamin B receptor homolog TM7SF2 (TM7SF2)                    | 35628_at                | N/A   | N/A                   | -1.6 | 1.0  | -1.3 | -1.8 | -2.7 | -1.8 | -4.5  |
|         | L37747      | A     | lamin B1 gene                                               | 37985_at                | N/A   | N/A                   | 1.9  | 1.3  | 1.3  | 2.0  | 3.8  | 4.4  | 5.2   |
|         | L34155      | A     | laminin-related protein (LamA3)                             | 37909_at                | N/A   | N/A                   | 1.5  | 1.1  | 1.1  | 1.5  | 1.9  | 1.8  | 2.7   |
|         | AF063020    | A     | lens epithelium-derived growth factor , complete cd         | 37622_r_at              | N/A   | N/A                   | 1.5  | 2.2  | -1.2 | 1.2  | 1.4  | 1.6  | 2.8   |
|         | M20560      | A     | lipocortin-III                                              | 31792_at                | N/A   | N/A                   | -1.3 | -1.5 | -1.4 | 1.6  | 2.2  | 2.8  | 5.3   |
|         | D90041      |       | liver arylamine N-acetyltransferase (EC 2.3.1.5)            | 38187_at                | N/A   | N/A                   | 6.0  | 1.1  | -2.7 | 1.0  | -2.0 | -2.3 | 1.6   |
|         | X15525      | B     | lysosomal acid phosphatase gene (EC 3.1.3.2)                | 36651_at                | N/A   | N/A                   | 1.3  | -1.2 | -1.5 | -1.8 | -1.7 | -2.7 | -1.8  |
|         | M63256      | A     | major Yo paraneoplastic antigen (CDR2)                      | 36190_at                | N/A   | N/A                   | 1.1  | 1.4  | -1.1 | 2.7  | 2.1  | 1.8  | 2.8   |
|         | AF071219    |       | mammaglobin B precursor                                     | 41066_at                | N/A   | N/A                   | -6.1 | -1.3 | 1.6  | 1.8  | -1.2 | -1.2 | -1.2  |
|         | U68385      |       | Meis1-related protein 2 (MRG2)                              | 37486_f_at              | N/A   | N/A                   | 1.4  | 1.4  | 1.7  | 2.7  | 1.2  | 1.5  | 1.2   |
|         | U40434      | B     | mesothelin or CAK1 antigen precursor                        | 32072_at                | N/A   | N/A                   | -1.1 | -1.3 | -1.3 | -1.7 | -1.3 | -2.7 | -1.4  |
|         | AF072242    |       | methyl-CpG binding protein MBD2 (MBD2)                      | 33905_at                | N/A   | N/A                   | -1.1 | 1.0  | -2.6 | 1.2  | -1.1 | 1.3  | -1.1  |
|         | U22233      | A     | methylothioadenosine phosphorylase (MTAP)                   | 38150_at                | N/A   | N/A                   | -1.7 | 1.1  | -1.1 | 2.3  | 2.2  | 2.3  | 6.8   |
|         | M59830      |       | MHC class III HSP70-2 gene (HLA)                            | 31892_at                | N/A   | N/A                   | 1.1  | -1.2 | 1.5  | 1.2  | 2.1  | 2.2  | -4.7  |
|         | U37283      | A     | microfibril-associated glycoprotein-2 MAGP-2 , complete cds | 36513_at                | N/A   | N/A                   | 4.1  | 4.1  | 3.2  | -1.1 | 1.1  | 1.0  | 8.4   |
|         | U04735      | A     | microsomal stress 70 protein ATPase core (stch)             | 38677_at                | N/A   | N/A                   | -1.1 | 1.4  | 2.4  | 2.2  | 2.0  | 2.4  | 4.6   |
|         | AF053306    | A     | mitotic checkpoint kinase Mad3L (MAD3L) , complete cds      | 35699_at                | N/A   | N/A                   | 1.8  | -1.3 | 1.7  | 1.3  | 4.1  | 5.0  | 6.3   |
|         | AF058056    |       | monocarboxylate transporter 2 (hMCT2)                       | 35547_at                | N/A   | N/A                   | 1.1  | 2.1  | 1.5  | 2.5  | -1.1 | 1.2  | 1.2   |
|         | M93056      | A     | monocyte/neutrophil elastase inhibitor                      | 33305_at                | N/A   | N/A                   | -1.3 | -1.1 | 1.6  | 1.4  | 1.3  | 3.3  | 4.9   |
|         | U85943      |       | mRNA-associated protein mmp41                               | 32759_at                | N/A   | N/A                   | 1.1  | -2.0 | -1.8 | -3.7 | 8.7  | 2.2  | 1.8   |
|         | AF055993    |       | mSin3A associated polypeptide p30                           | 40992_s_at              | N/A   | N/A                   | 1.2  | 1.2  | -2.1 | 7.7  | -1.2 | -1.3 | 14.7  |
|         | AF055993    |       | mSin3A associated polypeptide p30                           | 40993_r_at              | N/A   | N/A                   | 1.8  | -2.1 | 1.1  | -1.6 | 1.2  | 1.0  | 4.1   |
|         | AF039656    | B     | neuronal tissue-enriched acidic protein (NAP-22) ,          | 32607_at                | N/A   | N/A                   | -1.4 | 1.3  | -1.3 | -1.6 | -1.3 | -1.4 | -6.7  |
|         | U08021      | A     | nicotinamide N-methyltransferase (NNMT)                     | 37032_at                | N/A   | N/A                   | 1.3  | 1.4  | 1.5  | 1.4  | 1.7  | 2.7  | 2.1   |
|         | M30269      | B     | nidogen                                                     | 35366_at                | N/A   | N/A                   | -3.2 | -1.6 | -4.9 | -2.5 | -2.2 | -6.3 | -8.7  |
|         | M95178      | A     | non-muscle alpha-actinin                                    | 39330_s_at              | N/A   | N/A                   | 1.3  | -1.1 | 1.4  | 1.3  | 2.0  | 2.2  | 3.8   |
|         | U77413      |       | O-linked GlcNAc transferase                                 | 38614_s_at              | N/A   | N/A                   | 1.2  | -1.1 | 1.2  | 3.0  | 1.2  | -1.3 | 1.3   |
|         | U67784      | B     | orphan G protein-coupled receptor (RDC1)                    | 34288_at                | N/A   | N/A                   | -1.8 | -2.0 | -3.6 | -1.7 | -2.6 | -9.9 | -16.7 |
|         | AC004849    |       | PAC clone DJ0659J06 from 7q33-q35                           | 32810_at                | N/A   | N/A                   | 1.3  | 2.4  | 1.4  | 7.9  | -6.3 | -9.5 | 3.7   |
|         | AC004940    |       | PAC clone DJ0978E18 from 7p21                               | 35007_at                | N/A   | N/A                   | 1.5  | -1.6 | -1.3 | 2.7  | -1.1 | 1.1  | 2.9   |
|         | L20971      |       | phosphodiesterase                                           | 33705_at                | N/A   | N/A                   | -1.4 | -5.4 | -8.2 | -1.9 | -1.3 | -2.2 | -3.2  |
|         | M23410      | B     | plakoglobin (PLAK)                                          | 2047_s_at               | N/A   | N/A                   | 1.0  | -1.4 | -1.3 | -2.1 | -1.8 | -3.3 | -1.3  |

| GenBank     |       |                                                                  | Affymetrix   |       |                       | Fold Change |      |      |      |      |       |      |
|-------------|-------|------------------------------------------------------------------|--------------|-------|-----------------------|-------------|------|------|------|------|-------|------|
| Accession # | Group | Affymetric Gene Annotation                                       | Probe set id | GO id | GO Biological Process | 0           | 4    | 6    | 8    | 12   | 16    | 24   |
| U89278      |       | polyhomeotic 2 homolog (HPH2)                                    | 36960_at     | N/A   | N/A                   | 1.6         | -1.9 | 1.2  | 1.0  | 1.1  | -1.2  | 5.7  |
| J05581      | B     | polymorphic epithelial mucin (PEM)                               | 38783_at     | N/A   | N/A                   | 1.2         | -1.4 | -1.3 | -2.7 | -1.5 | -1.5  | -2.0 |
| U62767      |       | PP35                                                             | 38346_at     | N/A   | N/A                   | -1.2        | 1.3  | 1.1  | 2.6  | 1.2  | -1.1  | 2.0  |
| X75755      |       | PR264 gene                                                       | 36111_s_at   | N/A   | N/A                   | 1.4         | 1.0  | -5.4 | 1.6  | 1.8  | 1.0   | 1.6  |
| X75755      |       | PR264 gene                                                       | 36112_r_at   | N/A   | N/A                   | 1.4         | 1.0  | -5.4 | 1.6  | 1.8  | 1.0   | 1.6  |
| U02020      | A     | pre-B cell enhancing factor (PBEF)                               | 33849_at     | N/A   | N/A                   | 1.7         | 1.0  | 1.4  | 2.8  | 1.5  | 1.1   | 2.6  |
| U29185      | A     | prion protein (PrP) gene                                         | 36159_s_at   | N/A   | N/A                   | -1.2        | 1.4  | -1.3 | 2.4  | 2.0  | 2.5   | 3.1  |
| L07590      | B     | protein phosphatase 2A 130 kDa regulatory subunit                | 35211_at     | N/A   | N/A                   | -1.4        | 1.5  | -1.2 | -1.1 | -2.2 | -2.6  | -3.7 |
| X53795      |       | R2 an inductible membrane protein                                | 32247_at     | N/A   | N/A                   | 1.3         | -1.2 | 2.9  | 1.0  | 1.1  | 1.4   | 1.4  |
| AF098638    |       | rabaptin4                                                        | 32742_s_at   | N/A   | N/A                   | 7.0         | -1.2 | 2.4  | 1.6  | 1.5  | 1.9   | 1.7  |
| AF060219    | B     | RCC1-like G exchanging factor RLG                                | 35193_at     | N/A   | N/A                   | 1.1         | 1.3  | -2.2 | -1.3 | 1.2  | -3.1  | 2.7  |
| U89387      |       | RNA polymerase II subunit hsRPB4 gene                            | 33726_at     | N/A   | N/A                   | 1.9         | -2.0 | -1.1 | 1.6  | 1.1  | 1.0   | -2.9 |
| U90547      | B     | Ro/SSA ribonucleoprotein homolog (RoRet)                         | 35341_at     | N/A   | N/A                   | 1.0         | 1.3  | -1.4 | 1.0  | -1.2 | -1.1  | -4.3 |
| U02882      | A     | rolipram-sensitive 3,5-cyclic AMP phosphodiesterase              | 38826_at     | N/A   | N/A                   | 1.3         | 1.0  | 1.5  | 1.7  | 1.2  | 1.2   | 2.5  |
| AB012130    |       | SBC2 sodium bicarbonate cotransporter2                           | 34936_at     | N/A   | N/A                   | -1.2        | 1.0  | 1.6  | 2.8  | 2.4  | 1.3   | 2.3  |
| AF038966    |       | secretory carrier-associated membrane protein (SCAMP)            | 38849_at     | N/A   | N/A                   | 1.4         | -1.1 | 1.1  | 3.0  | 1.4  | 1.3   | 1.0  |
| U29091      | B     | selenium-binding protein (hSBP)                                  | 37405_at     | N/A   | N/A                   | 1.7         | 1.0  | -1.4 | -1.6 | -1.9 | -4.0  | -2.5 |
| AF042081    | B     | SH3 domain binding glutamic acid-rich-like protein               | 39714_at     | N/A   | N/A                   | -1.2        | -1.2 | -1.3 | 1.0  | -1.5 | -1.4  | -2.5 |
| U37146      |       | silencing mediator of retinoid and thyroid hormone action (SMRT) | 39384_at     | N/A   | N/A                   | 1.0         | -1.1 | -1.2 | -2.7 | -1.2 | -1.2  | -1.2 |
| M21302      | A     | small proline rich protein (sprl) , clone 174N                   | 36734_at     | N/A   | N/A                   | -1.3        | 1.1  | -1.7 | 1.1  | 2.5  | 1.7   | 6.5  |
| U19557      | B     | squamous cell carcinoma antigen 2 (SCCA2)                        | 1549_s_at    | N/A   | N/A                   | 4.0         | 1.5  | 1.0  | 1.4  | 1.1  | -1.8  | -3.3 |
| M25077      | A     | SS-A/Ro ribonucleoprotein autoantigen 60 kd subunit              | 35294_at     | N/A   | N/A                   | -1.4        | 1.0  | 1.1  | 2.7  | 1.8  | 3.7   | 1.7  |
| M25077      | A     | SS-A/Ro ribonucleoprotein autoantigen 60 kd subunit              | 35295_g_at   | N/A   | N/A                   | 1.2         | -1.3 | -1.1 | 3.3  | 1.5  | 2.5   | 2.0  |
| X82200      | B     | Slaf50                                                           | 36825_at     | N/A   | N/A                   | -1.2        | 1.0  | 1.1  | 1.0  | -3.2 | -1.8  | -3.4 |
| AF039558    | B     | synaptic glycoprotein-SC2 spliced variant                        | 38986_at     | N/A   | N/A                   | 1.7         | -1.1 | -1.2 | -2.5 | -2.0 | -2.9  | -2.1 |
| AF039945    | A     | synaptotagmin 2B                                                 | 36532_at     | N/A   | N/A                   | -1.5        | 1.1  | 1.8  | 2.4  | 2.3  | 2.6   | 1.9  |
| AF049910    | A     | TACC1 (TACC1)                                                    | 40841_at     | N/A   | N/A                   | 1.2         | 1.6  | -1.3 | 1.9  | 2.0  | 3.4   | 6.0  |
| M74089      |       | TB1 gene                                                         | 37178_at     | N/A   | N/A                   | 2.9         | 1.0  | -1.3 | 2.0  | 1.0  | 1.7   | -1.7 |
| AF087142    |       | TED protein (TED)                                                | 36807_at     | N/A   | N/A                   | 4.4         | -1.1 | -1.9 | 1.6  | 2.6  | 1.4   | 3.5  |
| U18271      | A     | thymopoietin (TMPO)                                              | 32882_at     | N/A   | N/A                   | 4.4         | -1.3 | 1.8  | 1.0  | 2.0  | 2.5   | 6.7  |
| L40371      |       | thyroid receptor interactor (TRIP4)                              | 41611_at     | N/A   | N/A                   | 1.1         | 1.6  | -1.6 | -1.2 | -2.7 | 1.0   | 1.0  |
| U07802      | A     | Tis1d gene                                                       | 32587_at     | N/A   | N/A                   | -1.3        | 1.3  | 1.5  | 2.1  | 2.6  | 3.6   | 2.3  |
| M55630      | A     | topoisomerase I pseudogene 2                                     | 31680_at     | N/A   | N/A                   | -1.3        | 1.0  | 1.5  | 3.6  | 2.4  | 2.2   | 2.4  |
| M62831      | A     | transcription factor ETR101                                      | 36097_at     | N/A   | N/A                   | -1.4        | 1.3  | 1.7  | 1.4  | 1.9  | 2.0   | 3.1  |
| AF064804    |       | transcription factor SUPT3H (SUPT3H)                             | 33205_at     | N/A   | N/A                   | -1.6        | 5.5  | 1.4  | -1.6 | 1.7  | -1.6  | -1.3 |
| M23161      | A     | transposon-like element                                          | 38727_at     | N/A   | N/A                   | -1.6        | 1.3  | 1.2  | 3.3  | 1.7  | 1.9   | 1.4  |
| U54644      |       | tub homolog                                                      | 34600_s_at   | N/A   | N/A                   | 1.4         | 1.1  | 8.7  | -1.3 | -1.3 | 1.1   | -1.5 |
| AF045583    |       | tubby like protein 3 (TULP3)                                     | 31942_at     | N/A   | N/A                   | 2.8         | 1.4  | 1.6  | -1.1 | -1.3 | 1.6   | 1.2  |
| AF040984    |       | unknown protein IT1                                              | 34482_at     | N/A   | N/A                   | 1.1         | 1.8  | 1.0  | 2.5  | 1.3  | 2.5   | 1.7  |
| Y12661      |       | vfg gene                                                         | 32969_r_at   | N/A   | N/A                   | -1.3        | 1.5  | 1.9  | 1.4  | 1.8  | 1.3   | 3.0  |
| AF039555    | B     | visinin-like protein 1 (VSNL1)                                   | 34281_at     | N/A   | N/A                   | -1.7        | -1.2 | -1.2 | -1.1 | -1.4 | -2.1  | -2.6 |
| X80507      |       | ZNF65                                                            | 37879_at     | N/A   | N/A                   | 2.1         | -1.3 | 2.7  | 1.0  | 1.2  | 1.5   | 2.4  |
| L32164      |       | zinc finger protein                                              | 35102_at     | N/A   | N/A                   | -2.7        | 1.0  | 4.0  | 1.7  | 1.8  | -13.3 | -1.5 |
| U09848      | B     | zinc finger protein (ZNF139)                                     | 41713_at     | N/A   | N/A                   | 1.2         | -1.3 | -1.8 | -2.5 | -2.3 | -2.6  | -1.9 |
| AF067656    |       | ZW10 interactor Zwint                                            | 35995_at     | N/A   | N/A                   | 1.3         | 1.3  | -1.3 | 1.0  | 3.3  | 5.5   | 3.9  |
| L40396      |       | (clone s22i71) fragment                                          | 33928_r_at   | N/A   | N/A                   | -4.1        | -1.9 | 2.2  | 5.6  | 1.0  | 1.8   | -1.8 |
| W26667      | A     | 11a1 cDNA                                                        | 33325_at     | N/A   | N/A                   | 1.5         | 1.2  | -1.3 | 1.8  | 3.7  | 3.3   | 7.6  |
| W25866      |       | 14c12 cDNA                                                       | 40348_s_at   | N/A   | N/A                   | 1.1         | 2.2  | -2.1 | 2.0  | 1.9  | 1.9   | 2.6  |
| W26851      |       | 17b12 cDNA                                                       | 38864_at     | N/A   | N/A                   | 2.9         | -1.6 | -5.1 | 1.2  | 1.9  | 2.7   | 1.6  |
| W25984      |       | 17e5 cDNA                                                        | 32130_at     | N/A   | N/A                   | -1.1        | 1.1  | 1.3  | -2.9 | -1.4 | -1.2  | -3.4 |
| W26099      | B     | 22f11 cDNA                                                       | 34812_at     | N/A   | N/A                   | 1.4         | -1.1 | -1.4 | -1.5 | -1.3 | -3.3  | -1.5 |
| W27541      | B     | 32c12 cDNA                                                       | 34776_at     | N/A   | N/A                   | 1.0         | -1.6 | -1.5 | -2.2 | -4.2 | -2.0  | -2.9 |
| W27549      | B     | 32d11 cDNA                                                       | 32963_s_at   | N/A   | N/A                   | -1.2        | 1.1  | -1.1 | -1.4 | -1.5 | -2.3  | -2.7 |
| W27619      |       | 35c7 cDNA                                                        | 41356_at     | N/A   | N/A                   | 1.3         | 1.3  | 2.0  | 1.3  | -1.1 | -2.1  | -2.6 |
| W27666      | A     | 36a5 cDNA                                                        | 34662_at     | N/A   | N/A                   | 1.4         | -1.7 | 3.3  | 2.1  | 1.3  | 1.2   | 3.0  |
| W27675      |       | 36b3 cDNA                                                        | 31665_s_at   | N/A   | N/A                   | 1.6         | 1.4  | 3.4  | 2.1  | 1.9  | 1.5   | -1.5 |
| W27858      |       | 39e3 cDNA                                                        | 31535_i_at   | N/A   | N/A                   | -2.3        | 1.2  | 1.2  | 1.3  | -2.8 | -2.0  | -1.5 |
| W27779      |       | 40d4 cDNA                                                        | 36347_at     | N/A   | N/A                   | -1.8        | -1.3 | 2.6  | -1.1 | 1.4  | -1.1  | 1.0  |
| W28170      |       | 43a12 cDNA                                                       | 40888_f_at   | N/A   | N/A                   | -2.6        | 1.2  | 3.5  | -1.2 | 1.2  | -2.7  | 1.4  |
| W28193      |       | 43d12 cDNA                                                       | 31668_f_at   | N/A   | N/A                   | -1.6        | -1.5 | 2.7  | 2.5  | -1.5 | -1.6  | 3.3  |
| W28299      | B     | 44h4 cDNA                                                        | 35361_at     | N/A   | N/A                   | 1.4         | -1.3 | 1.0  | -2.0 | -1.9 | -2.9  | -2.4 |
| W28214      |       | 45f7 cDNA                                                        | 39715_at     | N/A   | N/A                   | -1.1        | 1.1  | -2.7 | -1.4 | 1.3  | 1.0   | 1.6  |
| W28479      |       | 47d8 cDNA                                                        | 37758_s_at   | N/A   | N/A                   | -1.4        | 1.4  | 1.0  | 1.5  | 1.7  | 2.7   | -1.2 |
| W28281      | B     | 47e7 cDNA                                                        | 35785_at     | N/A   | N/A                   | -1.1        | 1.1  | -1.1 | -1.7 | -3.9 | -4.7  | -4.9 |
| W28438      | B     | 47g10 cDNA                                                       | 36497_at     | N/A   | N/A                   | 1.1         | -1.1 | -1.5 | -1.7 | -1.3 | -2.2  | -2.8 |
| W28493      |       | 47h11 cDNA                                                       | 39464_at     | N/A   | N/A                   | -2.1        | 1.1  | 2.7  | 1.2  | 1.5  | 2.9   | -1.2 |
| W28518      |       | 48a1 cDNA                                                        | 39484_at     | N/A   | N/A                   | -1.5        | -1.1 | 2.2  | 1.0  | -1.7 | 5.7   | 1.1  |
| W28558      |       | 48f7 cDNA                                                        | 34149_at     | N/A   | N/A                   | 2.7         | 1.0  | 1.4  | 2.1  | -1.2 | -1.2  | 1.5  |
| W28610      |       | 49b12 cDNA                                                       | 38941_s_at   | N/A   | N/A                   | 1.1         | 2.2  | 1.6  | 1.0  | -3.6 | 1.5   | 3.4  |
| W28612      | B     | 49b3 cDNA                                                        | 33328_at     | N/A   | N/A                   | -1.1        | 2.1  | -1.3 | -1.7 | -1.7 | -2.9  | -8.7 |
| W28740      |       | 51a5 cDNA                                                        | 32379_f_at   | N/A   | N/A                   | -2.2        | 1.3  | 2.1  | 1.3  | 3.7  | 5.2   | -2.4 |
| W28931      | B     | 56f3 cDNA                                                        | 38449_at     | N/A   | N/A                   | 1.0         | -1.2 | -1.1 | -1.8 | -1.4 | -2.8  | -1.4 |
| AA780435    |       | ae93d06 s1 cDNA                                                  | 38926_at     | N/A   | N/A                   | -1.1        | -1.1 | 18.9 | -1.1 | 1.0  | -3.0  | 3.1  |
| AA868268    | A     | ak40a05 s1 cDNA                                                  | 40574_at     | N/A   | N/A                   | 1.0         | 1.1  | 2.3  | 2.4  | 2.6  | 2.4   | 2.2  |
| S63912      |       | D10S102=FBRNP                                                    | 33317_at     | N/A   | N/A                   | 1.9         | 2.8  | -1.6 | 1.9  | 2.8  | 2.1   | 1.3  |
| AL022312    |       | dJ1104E16.2 activating transcription factor 4                    | 41235_at     | N/A   | N/A                   | -1.3        | -1.2 | 1.2  | -1.2 | -1.1 | 1.2   | 3.0  |
| Z98046      | B     | dJ14C9.2 (Melanoma-Associated Antigen MAGE LIKE)                 | 34860_g_at   | N/A   | N/A                   | -1.1        | -1.1 | 1.2  | -1.1 | -1.7 | -1.5  | -2.6 |
| AL021397    |       | dJ69E11.3 (Yeast YPR037W and worm C02C2.6 predicted proteins L   | 33035_at     | N/A   | N/A                   | -1.3        | 1.7  | 1.3  | 2.5  | 2.2  | 1.4   | -1.1 |
| AL080196    |       | DKFZp434C212                                                     | 40802_at     | N/A   | N/A                   | -1.2        | 1.2  | -1.1 | 1.1  | 1.0  | 4.2   | -1.2 |

| GenBank     |       |                                                              | Affy         |       |                       | Fold Change |      |       |      |       |       |       |
|-------------|-------|--------------------------------------------------------------|--------------|-------|-----------------------|-------------|------|-------|------|-------|-------|-------|
| Accession # | Group | Affymeric Gene Annotation                                    | Probe set id | GO id | GO Biological Process | 0           | 4    | 6     | 8    | 12    | 16    | 24    |
| AL041124    |       | DKFZp434D0316_s1                                             | 32502_at     | N/A   | N/A                   | -1.3        | -1.2 | 1.9   | -3.0 | -1.2  | -1.8  | -2.4  |
| AL080130    |       | DKFZp434E033                                                 | 40530_at     | N/A   | N/A                   | -1.3        | -1.3 | 1.2   | 1.2  | 1.0   | 2.8   | -1.9  |
| AL041879    | A     | DKFZp434H0419_r1                                             | 33165_at     | N/A   | N/A                   | 1.3         | 1.1  | -1.1  | 1.3  | 1.1   | 1.4   | 3.4   |
| AL096570    |       | DKFZp434H244                                                 | 34969_s_at   | N/A   | N/A                   | 1.3         | 1.3  | -1.5  | -2.6 | -2.0  | -2.1  | -1.4  |
| AL080156    | A     | DKFZp434J214                                                 | 39411_at     | N/A   | N/A                   | -1.5        | 1.5  | 2.0   | 1.9  | 1.9   | 2.8   | 1.5   |
| AL049923    |       | DKFZp547E2210                                                | 32119_at     | N/A   | N/A                   | -1.3        | 1.0  | 1.9   | 2.9  | 1.5   | -1.2  | 1.6   |
| AL049974    |       | DKFZp564B222                                                 | 39470_at     | N/A   | N/A                   | 1.4         | 1.4  | 2.2   | 5.4  | 1.9   | 2.7   | 1.2   |
| AL050389    |       | DKFZp564F013                                                 | 34910_s_at   | N/A   | N/A                   | 1.1         | -1.7 | 1.3   | 3.0  | 1.0   | 1.0   | 2.2   |
| AL049266    |       | DKFZp564F093                                                 | 38857_r_at   | N/A   | N/A                   | 1.3         | -1.3 | -1.6  | 1.6  | 8.9   | 17.7  | -1.5  |
| AL080101    |       | DKFZp564L0472                                                | 39128_at     | N/A   | N/A                   | 1.1         | 1.0  | -2.6  | 1.1  | 1.9   | -1.4  | -1.2  |
| AL049851    | A     | DKFZp564O0122                                                | 33373_at     | N/A   | N/A                   | 1.3         | -1.3 | -1.7  | 1.5  | 2.9   | 2.4   | 4.1   |
| AL050002    | B     | DKFZp564O222                                                 | 38312_at     | N/A   | N/A                   | 1.1         | -1.2 | -1.5  | -2.0 | -1.3  | -1.6  | -3.0  |
| AL050066    | A     | DKFZp566O133                                                 | 36318_at     | N/A   | N/A                   | 1.3         | 1.0  | 1.8   | 3.4  | 2.2   | 2.3   | 2.6   |
| AL050159    | B     | DKFZp568A0522                                                | 38717_at     | N/A   | N/A                   | -1.2        | 1.3  | 1.1   | -1.1 | -2.5  | -2.4  | -9.1  |
| AL049423    |       | DKFZp568B211                                                 | 32119_at     | N/A   | N/A                   | 1.0         | -1.4 | 1.3   | 1.0  | -1.1  | -12.6 | -1.9  |
| AL080235    | A     | DKFZp568E1621                                                | 35692_at     | N/A   | N/A                   | 1.3         | -1.3 | -2.0  | 1.7  | 2.3   | 1.9   | 3.0   |
| AL050173    |       | DKFZp568F0422                                                | 32107_at     | N/A   | N/A                   | 1.3         | -1.3 | 3.2   | 3.1  | 1.9   | 1.6   | 1.1   |
| AL050128    |       | DKFZp568G051                                                 | 38318_at     | N/A   | N/A                   | 1.2         | 1.4  | -2.5  | 2.5  | 1.4   | 1.3   | -2.3  |
| AL080110    | A     | DKFZp568G1922                                                | 39600_at     | N/A   | N/A                   | 1.6         | 1.4  | 1.1   | 1.8  | 1.8   | 2.2   | 6.6   |
| AL080213    | B     | DKFZp568I1823                                                | 36092_at     | N/A   | N/A                   | 1.1         | 1.8  | -1.6  | -1.2 | -1.3  | -1.3  | -2.8  |
| AL050110    |       | DKFZp568J0619                                                | 39022_at     | N/A   | N/A                   | 1.0         | -1.6 | -1.3  | -3.4 | -1.5  | -1.2  | -1.4  |
| AL049382    | A     | DKFZp568K1318                                                | 36551_at     | N/A   | N/A                   | -1.1        | 1.0  | -1.1  | 1.6  | 1.2   | 2.2   | 3.3   |
| AL050396    |       | DKFZp568K1720                                                | 32749_s_at   | N/A   | N/A                   | 1.3         | -1.2 | -1.8  | -2.0 | 1.1   | -1.2  | 2.6   |
| AL049389    | A     | DKFZp568O0118                                                | 36070_at     | N/A   | N/A                   | 1.3         | -1.1 | -5.7  | -2.8 | 10.9  | 2.2   | 16.5  |
| AL050114    |       | DKFZp568P2219                                                | 38502_at     | N/A   | N/A                   | -1.2        | -1.9 | 1.2   | 1.1  | -2.7  | -1.9  | -1.6  |
| U72206      |       | guanine nucleotide regulatory factor (LFP40)                 | 40100_at     | N/A   | N/A                   | -1.1        | -1.5 | 3.0   | 1.1  | 1.4   | 1.1   | 3.7   |
| U51694      |       | HSU51694 cDNA /gb=U51694 /gi=1255286 /ug=Hs.220798 /len=1000 | 33364_at     | N/A   | N/A                   | -1.1        | 1.6  | -1.3  | -4.7 | -10.2 | 1.9   | -9.7  |
| U51712      |       | HSU51712 cDNA /gb=U51712 /gi=1255282 /ug=Hs.13775 /len=1000  | 39698_at     | N/A   | N/A                   | -6.6        | 1.3  | 1.2   | 1.4  | -1.3  | 1.2   | 2.5   |
| U51713      |       | HSU51713 cDNA                                                | 31629_at     | N/A   | N/A                   | -2.2        | -2.4 | 2.1   | 5.3  | 1.0   | -2.8  | 1.2   |
| U55980      |       | HSU55980                                                     | 38991_at     | N/A   | N/A                   | 1.5         | 2.6  | 1.1   | -1.8 | 1.0   | -1.1  | 1.0   |
| D11958      |       | HUM0S11H12 cDNA                                              | 32429_f_at   | N/A   | N/A                   | -1.3        | 1.1  | -1.1  | 1.4  | 1.1   | -2.6  | 1.4   |
| AA586695    |       | nn42h06.s1 cDNA                                              | 34059_at     | N/A   | N/A                   | 1.4         | -1.2 | 1.7   | -1.1 | 1.0   | -3.7  | 1.1   |
| AA650210    | A     | ns88b12.s1 cDNA                                              | 37476_at     | N/A   | N/A                   | 1.1         | -1.6 | 1.9   | 2.2  | 3.8   | 2.6   | 1.9   |
| AA873858    | B     | oh79b10.s1 cDNA                                              | 36347_f_at   | N/A   | N/A                   | 1.0         | 1.1  | 1.7   | -1.3 | -1.3  | -1.5  | -3.8  |
| AA904505    | B     | ol26b03.s1 cDNA                                              | 35598_at     | N/A   | N/A                   | -1.3        | 1.1  | 1.0   | -1.1 | 1.0   | -1.7  | -2.8  |
| AA933984    |       | on95f04.s1 cDNA                                              | 39506_at     | N/A   | N/A                   | -1.2        | -1.1 | -12.6 | 4.4  | 2.6   | 2.6   | 1.9   |
| AI141670    | B     | ot08b12.x1 cDNA                                              | 40175_at     | N/A   | N/A                   | 1.3         | 1.1  | 1.3   | -1.5 | -1.3  | -3.1  | -1.1  |
| AI040379    | B     | ox16c05.x1 cDNA                                              | 33017_at     | N/A   | N/A                   | -2.0        | 2.7  | -1.5  | 1.3  | -1.5  | -1.3  | -29.6 |
| AI057607    |       | oy31e07.x1 cDNA                                              | 37316_r_at   | N/A   | N/A                   | -2.4        | -3.4 | 1.8   | 2.4  | 1.0   | -1.1  | -1.3  |
| AI097085    |       | oz22c10.x1 cDNA                                              | 38245_i_at   | N/A   | N/A                   | 4.6         | -1.5 | -20.3 | 16.2 | 17.7  | 1.1   | -2.9  |
| AI123426    |       | qa84c09.x1 cDNA                                              | 33861_at     | N/A   | N/A                   | -2.8        | 1.0  | 1.4   | -1.1 | -1.1  | 1.6   | -1.1  |
| AI140114    | A     | qa85c06.x1 cDNA                                              | 41824_at     | N/A   | N/A                   | -1.5        | 1.1  | 1.0   | 2.3  | 1.5   | 2.9   | 1.5   |
| AI138605    | B     | qc31e09.x1 cDNA                                              | 35143_at     | N/A   | N/A                   | 1.0         | 1.5  | 1.2   | -1.8 | -1.9  | -2.2  | -3.9  |
| AI126004    |       | qc50e12.x1 cDNA                                              | 33150_at     | N/A   | N/A                   | 1.1         | 1.2  | 1.4   | 3.3  | 1.8   | 1.3   | 1.0   |
| S66896      | B     | squamous cell carcinoma antigen=serine protease inhibitor    | 1343_s_at    | N/A   | N/A                   | -1.5        | 1.3  | -1.7  | 1.0  | 1.1   | 1.3   | -2.6  |
| AI375033    |       | ta66e10.x1 cDNA                                              | 37883_i_at   | N/A   | N/A                   | -1.1        | 1.1  | 1.4   | 2.9  | -1.1  | 1.2   | -1.2  |
| AI37607     |       | tb15h10.x1 cDNA                                              | 32509_at     | N/A   | N/A                   | 1.2         | 1.4  | 2.7   | 1.1  | 2.0   | 1.4   | 1.1   |
| AI378632    |       | tc72g11.x1 cDNA                                              | 41303_r_at   | N/A   | N/A                   | -1.4        | -1.9 | 20.0  | 2.7  | -1.4  | -2.4  | 4.7   |
| AI381790    | B     | te41h10.x1 cDNA                                              | 32527_at     | N/A   | N/A                   | -1.5        | 1.0  | -1.1  | -1.7 | -2.0  | -2.0  | -2.8  |
| AI400011    |       | tg85a05.x1 cDNA                                              | 40257_at     | N/A   | N/A                   | -1.2        | -1.6 | 1.5   | 1.2  | -6.9  | -1.9  | -1.3  |
| AI624840    |       | ts71g11.x1 cDNA                                              | 33492_at     | N/A   | N/A                   | -4.6        | -1.2 | 2.8   | -3.1 | 4.5   | 2.0   | -1.3  |
| AI656421    |       | tt50h10.x1 cDNA                                              | 41809_at     | N/A   | N/A                   | 1.3         | 1.2  | -1.4  | 2.6  | 1.1   | 1.5   | 1.5   |
| AI810767    |       | tu04d02.x1 cDNA                                              | 34247_at     | N/A   | N/A                   | -4.2        | 1.0  | 1.3   | -1.2 | -9.1  | -7.5  | -1.8  |
| SE9790      |       | tumor suppressor (3' region)                                 | 1058_at      | N/A   | N/A                   | 1.0         | 1.5  | -1.6  | 2.2  | 2.8   | 1.4   | 1.0   |
| AI635895    |       | tz82a07.x1 cDNA                                              | 36629_at     | N/A   | N/A                   | 1.1         | 1.1  | -1.7  | -2.5 | -2.6  | -2.5  | -1.3  |
| AI688098    | B     | wc82h08.x1 cDNA                                              | 32980_f_at   | N/A   | N/A                   | 1.0         | 1.2  | 1.3   | -1.5 | -1.4  | -1.5  | -2.7  |
| AI700633    |       | we38g03.x1 cDNA                                              | 34840_at     | N/A   | N/A                   | -1.5        | 1.6  | 1.0   | 1.6  | 1.9   | 2.7   | 1.0   |
| AI690929    | B     | wf20a09.x1 cDNA                                              | 41871_at     | N/A   | N/A                   | 1.0         | -1.1 | -1.1  | -1.2 | -1.2  | -2.3  | -3.0  |
| AI743654    |       | wg41d01.x1 cDNA                                              | 40244_s_at   | N/A   | N/A                   | 1.1         | -1.2 | -2.4  | 1.6  | -1.2  | -1.4  | -3.0  |
| AI885852    |       | wf62d08.x1 cDNA                                              | 32609_at     | N/A   | N/A                   | -2.4        | 1.5  | 1.1   | -1.5 | -1.4  | -1.1  | -3.6  |
| AI835420    | A     | wo84c08.x1 cDNA                                              | 39823_at     | N/A   | N/A                   | 1.0         | -1.1 | -1.2  | 3.5  | 3.2   | 1.6   | 1.1   |
| AI928387    |       | wc96f10.x1 cDNA                                              | 33225_at     | N/A   | N/A                   | -1.2        | 1.0  | 1.5   | -1.5 | -1.3  | -3.0  | -1.9  |
| AW052084    | B     | wy86f07.x1 cDNA                                              | 33193_at     | N/A   | N/A                   | 1.2         | -1.1 | 1.0   | -1.1 | -1.8  | -3.6  | -3.3  |
| T83979      |       | yd66a11.s1 cDNA                                              | 39228_at     | N/A   | N/A                   | -1.3        | 1.4  | 1.4   | 3.0  | -1.4  | 1.0   | 1.2   |
| H10776      |       | ym07h11.1.c1 cDNA                                            | 39560_at     | N/A   | N/A                   | 1.4         | 1.2  | 2.2   | 1.4  | -1.1  | 1.3   | -2.5  |
| H16917      | B     | ym39e02.r1 cDNA                                              | 39879_s_at   | N/A   | N/A                   | 1.1         | -1.1 | 1.3   | 1.1  | -1.3  | -1.7  | -2.5  |
| AI668626    |       | yo63b04.x5 cDNA                                              | 37803_at     | N/A   | N/A                   | -1.1        | 1.4  | -5.4  | 1.7  | 1.5   | -1.7  | 3.6   |
| N58115      |       | yy65a01.s1 cDNA                                              | 38940_at     | N/A   | N/A                   | -8.9        | 2.6  | -3.7  | 5.3  | 14.3  | 6.9   | 10.2  |
| N36638      |       | yx88f05.r1 cDNA                                              | 39366_at     | N/A   | N/A                   | -1.3        | 1.0  | -2.5  | 1.1  | 1.0   | -1.4  | -1.9  |
| AA009569    | A     | zfo4h03.r1 cDNA                                              | 40943_at     | N/A   | N/A                   | 1.1         | -1.1 | 1.0   | 3.5  | 1.7   | 1.2   | 1.5   |
| AA129726    |       | zli16g09.s1 cDNA                                             | 40197_at     | N/A   | N/A                   | 1.0         | 2.3  | 1.0   | -1.1 | 1.9   | -1.1  | -3.2  |
| AA128249    | B     | zli29d09.r1 cDNA                                             | 38430_at     | N/A   | N/A                   | 1.4         | 1.6  | -1.6  | 1.2  | -1.5  | -1.7  | -9.8  |
| AA14302     |       | zli48a07.r1 cDNA                                             | 39289_at     | N/A   | N/A                   | -1.2        | 1.3  | 2.6   | 4.2  | 1.6   | 1.4   | 1.3   |
| AA151971    |       | zo30b03.r1                                                   | 34704_r_at   | N/A   | N/A                   | 1.5         | 1.6  | 1.5   | -1.8 | 1.5   | -3.3  | 1.0   |
| AA151971    | A     | zo30b03.r1 cDNA                                              | 34703_f_at   | N/A   | N/A                   | 1.7         | -1.3 | -1.1  | -2.0 | 1.2   | 2.7   | 4.9   |
| AA160708    |       | zo72c02.r1 cDNA                                              | 32203_at     | N/A   | N/A                   | 1.1         | -1.1 | 1.1   | -1.2 | 1.2   | -1.4  | 2.5   |
| AA216639    |       | zq95f07.s1 cDNA                                              | 32163_f_at   | N/A   | N/A                   | 3.1         | 1.1  | -1.1  | -1.2 | -1.7  | -1.4  | 1.1   |
| AA255502    | A     | zr58b06.r1 cDNA                                              | 39889_at     | N/A   | N/A                   | 1.4         | 1.2  | -1.9  | -1.6 | 2.5   | 6.6   | 6.0   |
| AA398463    | A     | zli62e11.s1 cDNA                                             | 41334_r_at   | N/A   | N/A                   | -1.4        | -1.8 | -1.8  | 5.7  | 2.1   | 1.0   | 2.5   |

| GenBank     |       |                                                                   | Affymetrix   |       |                       | Fold Change |      |      |      |      |      |      |
|-------------|-------|-------------------------------------------------------------------|--------------|-------|-----------------------|-------------|------|------|------|------|------|------|
| Accession # | Group | Affymetric Gene Annotation                                        | Probe set id | GO id | GO Biological Process | 0           | 4    | 6    | 8    | 12   | 16   | 24   |
|             |       | 18S rRNA gene                                                     |              |       |                       | -4.7        | 1.0  | 3.6  | 4.0  | 2.2  | 1.9  | -1.3 |
|             | A     | Dihydrofolate Reductase, Alt. Splice 6                            |              |       |                       | 1.5         | 1.3  | 1.3  | -1.1 | 1.1  | 2.7  | 3.2  |
|             |       | Fibroblast Growth Factor Receptor K-Sam, Alt. Splice 3, K-Sam III |              |       |                       | -1.7        | 1.1  | 1.3  | -1.4 | -2.8 | 1.0  | 2.9  |
|             |       | Fibronectin, Alt. Splice 1                                        |              |       |                       | 1.9         | -1.1 | 1.1  | -2.6 | 1.1  | -1.6 | 1.7  |
|             | B     | Guanine Nucleotide Exchange Factor 1                              |              |       |                       | 1.7         | -1.4 | -1.6 | 1.0  | 1.2  | -3.2 | -2.5 |
|             | B     | Mucin 1, Epithelial, Alt. Splice 9                                |              |       |                       | 1.4         | -1.4 | -1.6 | -3.4 | -1.9 | -2.1 | -1.7 |
|             |       | Neurofibromatosis 2 Tumor Suppressor                              |              |       |                       | -4.5        | 1.1  | 1.5  | -1.1 | -1.3 | 2.1  | 1.2  |
|             |       | Oncogene Tis/Chop, Fusion Activated                               |              |       |                       | -1.3        | 1.7  | -2.9 | -1.5 | -3.6 | 1.1  | 24.4 |
|             | A     | Proto-Oncogene C-Myc, Alt. Splice 3, Orf 114                      |              |       |                       | 1.3         | -1.4 | 1.7  | 1.9  | 1.3  | 1.1  | 3.8  |
|             |       | Rad2                                                              |              |       |                       | -1.2        | 1.0  | -1.1 | 1.8  | 6.5  | 9.0  | 3.8  |
|             |       | Rad2                                                              |              |       |                       | -1.2        | 1.0  | -1.8 | -1.1 | 4.2  | 6.9  | 2.3  |
|             |       | Retinoblastoma 1                                                  |              |       |                       | 2.7         | 1.1  | 1.8  | 1.0  | 1.1  | -1.4 | -1.1 |
|             | A     | Spermidine/Spermine N1-Acetyltransferase, Alt. Splice 2           |              |       |                       | 1.1         | -1.5 | 1.0  | -1.1 | 1.1  | 1.9  | 4.6  |
|             |       | Tyrosine Kinase Fer                                               |              |       |                       | 10.6        | -1.2 | 13.1 | 3.7  | 1.7  | -6.9 | 1.9  |
|             | A     | Tyrosine Phosphatase, Epsilon                                     |              |       |                       | 1.9         | 1.1  | 3.5  | 2.5  | 2.2  | 2.3  | 3.0  |
|             |       | Mucin 3, Intestinal                                               |              |       |                       | 1.1         | -1.6 | -2.1 | 1.1  | -1.1 | -1.3 | -2.7 |
|             |       | transferrin receptor                                              |              |       |                       | 3.5         | 1.7  | 2.8  | 1.9  | 1.0  | 1.4  | -3.7 |

**Table S4. Genes differentially expressed 4.5 fold or greater.** A subset of genes from Table 3 that were differentially expressed 4.5 fold or more at one or more timepoints. Genbank accession numbers corresponding to elements on the U95A array, gene annotation and fold change in mRNA abundance in rAd MEK1EE infected cells relative to LacZ infected MCF-12A cells is shown for the time points indicated. Positive numbers and negative numbers indicate fold up and down regulation, respectively. Genes cited in the text are indicated in italics.

Supplemental Table 4  
Group A & B Genes differentially expressed  $\geq 4.5$  fold in  
rAd MEK1EE vs rAd Lac-Z infected cells<sup>1,2,3</sup>

| Accession#                          | Gene Annotation                                                   | Hours Post Infection |      |      |      |      |      |       |
|-------------------------------------|-------------------------------------------------------------------|----------------------|------|------|------|------|------|-------|
|                                     |                                                                   | 0                    | 4    | 6    | 8    | 12   | 16   | 24    |
| <b>Intracellular Signalling</b>     |                                                                   |                      |      |      |      |      |      |       |
| AB013382                            | <i>DUSP6</i>                                                      | 1.2                  | 1.2  | 16.2 | 24.1 | 26.3 | 31.3 | 143.4 |
| U15932                              | <i>dual-specificity protein phosphatase</i>                       | 1.1                  | 0.9  | 4.1  | 4.3  | 3.2  | 4.9  | 24.0  |
| M86699                              | Human kinase (TTK)                                                | 1.7                  | 1.2  | 0.7  | 2.5  | 6.0  | 7.2  | 11.3  |
| Y13115                              | SAK serine/threonine protein kinase                               | 3.5                  | 0.5  | 0.2  | 9.4  | 14.1 | 14.2 | 8.8   |
| AF039843                            | Sprouty 2 (SPRY2)                                                 | 1.3                  | 1.3  | 3.1  | 4.5  | 3.0  | 6.0  | 8.3   |
| U59877                              | low-Mr GTP-binding protein (RAB31)                                | 0.7                  | 0.9  | 0.9  | 0.8  | 1.6  | 1.5  | 7.7   |
| M23379                              | GTPase-activating protein ras p21 (RASA)                          | 0.8                  | 1.5  | 1.7  | 3.5  | 3.2  | 3.7  | 5.6   |
| AF011468                            | <i>serine/threonine kinase (BTAK)</i>                             | 1.0                  | 1.4  | 1.1  | 1.0  | 1.6  | 2.7  | 4.9   |
| U48807                              | <i>MAP kinase phosphatase (MKP-2)</i>                             | 1.1                  | 0.6  | 10.3 | 5.5  | 4.3  | 4.9  | 4.3   |
| AF001862                            | FYN binding protein                                               | -1.9                 | -0.8 | -3.3 | -1.2 | -1.8 | -3.1 | -20.9 |
| U67784                              | orphan G protein-coupled receptor (RDC1)                          | -1.8                 | -2.0 | -3.6 | -1.7 | -2.6 | -9.9 | -16.7 |
| Y11312                              | phosphoinositide 3-kinase C2 Beta                                 | -0.7                 | -0.8 | -2.0 | -2.8 | -3.0 | -3.6 | -9.8  |
| U02390                              | adenylyl cyclase-associated protein homolog CAP2                  | -2.0                 | -1.0 | -1.1 | -1.4 | -2.0 | -0.7 | -8.2  |
| L07590                              | protein phosphatase 2A 130 kDa regulatory subunit                 | -0.6                 | -0.9 | -1.7 | -1.2 | -2.9 | -4.4 | -6.7  |
| AF068180                            | B cell linker protein BLNK                                        | -1.2                 | -0.4 | -0.8 | -1.1 | -2.5 | -2.2 | -5.9  |
| L37882                              | frizzled gene product                                             | -0.6                 | -1.6 | -1.0 | -3.2 | -2.7 | -5.3 | -3.6  |
| D83492                              | Eph-family protein                                                | -1.1                 | -1.6 | -1.1 | -1.9 | -2.2 | -5.3 | -2.4  |
| D88532                              | p55pik                                                            | -0.6                 | -1.1 | -0.7 | -0.8 | -1.9 | -4.7 | -1.9  |
| M34309                              | <i>epidermal growth factor receptor (HER3)</i>                    | -1.0                 | -1.6 | -1.4 | -2.3 | -1.7 | -5.1 | -1.5  |
| <b>Growth Factors and Cytokines</b> |                                                                   |                      |      |      |      |      |      |       |
| M60278                              | <i>heparin-binding EGF-like growth factor</i>                     | 1.3                  | 1.5  | 2.7  | 1.8  | 2.3  | 2.8  | 33.8  |
| D30783                              | <i>epiregulin</i>                                                 | 0.6                  | 2.1  | 5.3  | 13.1 | 11.1 | 3.2  | 13.5  |
| M30704                              | <i>amphiregulin (AR)</i>                                          | 1.0                  | 0.8  | 2.3  | 1.5  | 2.3  | 3.9  | 11.0  |
| X70340                              | <i>transforming growth factor alpha</i>                           | 0.7                  | 0.7  | 1.6  | 3.9  | 3.7  | 4.5  | 8.5   |
| M34057                              | transforming growth factor-beta 1 binding protein                 | 0.9                  | 1.1  | 0.7  | 0.7  | 2.9  | 3.5  | 5.8   |
| X59065                              | <i>FGF</i>                                                        | -1.0                 | -0.9 | -1.6 | -1.3 | -7.8 | -2.7 | -9.1  |
| <b>Transcription</b>                |                                                                   |                      |      |      |      |      |      |       |
| AB028021                            | <i>HNF-3beta mRNA for hepatocyte nuclear factor-3 beta</i>        | 1.7                  | 1.6  | 9.3  | 1.9  | 13.5 | 14.5 | 18.2  |
| X96381                              | erm gene, exon 2,3,4,5                                            | 1.2                  | 1.2  | 1.3  | 3.3  | 4.8  | 8.0  | 14.2  |
| L39060                              | transcription factor SL1                                          | 0.5                  | 0.8  | 1.0  | 3.0  | 2.6  | 4.1  | 7.3   |
| V01512                              | <i>cellular oncogene c-fos</i>                                    | 0.8                  | 1.8  | 2.9  | 4.7  | 7.1  | 6.4  | 5.1   |
| X66087                              | a-myb                                                             | 1.1                  | 1.5  | 2.7  | 0.8  | 27.3 | 3.9  | 2.4   |
| X63741                              | H.sapiens pilot mRNA                                              | 1.2                  | 0.8  | 0.8  | 4.1  | 32.3 | 1.0  | 1.5   |
| AF055376                            | short form transcription factor C-MAF (c-maf)                     | -1.4                 | -0.6 | -4.0 | -2.1 | -2.3 | -6.2 | -17.5 |
| X16281                              | zinc finger protein (clone 431)                                   | -0.2                 | -1.4 | -2.3 | -1.2 | -1.9 | -3.0 | -10.9 |
| AF055376                            | short form transcription factor C-MAF (c-maf)                     | -1.6                 | -0.4 | -7.1 | -3.3 | -2.4 | -5.8 | -6.7  |
| M26679                              | homeobox protein (HOX-1.3)                                        | -0.9                 | -1.1 | -1.5 | -0.9 | -1.7 | -3.6 | -5.8  |
| AF040963                            | <i>Mad4 homolog (Mad4)</i>                                        | -1.2                 | -1.2 | -0.7 | -2.2 | -2.1 | -2.3 | -4.6  |
| X58072                              | hGATA3 mRNA for trans-acting T-cell specific transcription factor | -1.0                 | -1.4 | -2.2 | -1.5 | -2.4 | -4.5 | -4.4  |
| <b>Cell Cycle/ Proliferation</b>    |                                                                   |                      |      |      |      |      |      |       |
| X65550                              | mk167a (long type)                                                | 1.6                  | 0.9  | 1.4  | 0.7  | 3.6  | 7.1  | 12.5  |
| U66838                              | <i>Human cyclin A1</i>                                            | 1.6                  | 0.9  | 2.0  | 2.7  | 3.4  | 3.4  | 11.1  |
| U73379                              | Human cyclin-selective ubiquitin carrier protein                  | 1.4                  | 1.0  | 1.2  | 0.9  | 2.5  | 4.3  | 9.2   |
| L25876                              | protein tyrosine phosphatase (CIP2)                               | 2.0                  | 1.0  | 0.4  | 0.6  | 2.1  | 2.6  | 8.1   |
| D88357                              | CDC2 delta T                                                      | 1.7                  | 1.6  | 1.3  | 1.7  | 1.9  | 8.4  | 8.1   |
| X65550                              | mk167a (long type)                                                | 0.9                  | 0.7  | 0.3  | 1.4  | 4.0  | 3.0  | 7.9   |
| AF053305                            | <i>mitotic checkpoint kinase Bub1 (BUB1)</i>                      | 1.2                  | 1.3  | 0.2  | 2.1  | 2.2  | 7.2  | 7.6   |
| M25753                              | <i>Human cyclin B</i>                                             | 2.0                  | 1.0  | 0.6  | 1.2  | 2.4  | 2.9  | 7.2   |
| U01038                              | Human pLK                                                         | 1.1                  | 1.1  | 1.5  | 0.7  | 5.7  | 1.9  | 6.6   |
| AF053306                            | <i>mitotic checkpoint kinase Mad3L (MAD3L)</i>                    | 1.8                  | 0.8  | 1.7  | 1.3  | 4.1  | 5.0  | 6.3   |
| M81933                              | <i>cdc25A</i>                                                     | 0.4                  | 0.9  | 1.8  | 1.1  | 5.6  | 4.4  | 6.2   |
| X51688                              | <i>cyclin A</i>                                                   | 1.0                  | 0.6  | 3.2  | 0.8  | 2.4  | 4.4  | 6.1   |
| M25753                              | <i>Human cyclin B</i>                                             | 1.8                  | 0.8  | 0.8  | 1.6  | 3.2  | 2.7  | 6.1   |
| X51688                              | <i>cyclin A</i>                                                   | 2.0                  | 0.8  | 1.7  | 2.2  | 2.1  | 2.5  | 5.8   |
| AF091433                            | <i>cyclin E2</i>                                                  | 2.2                  | 1.2  | 0.8  | 5.7  | 13.6 | 12.6 | 5.1   |



|                                      |                                                       |      |      |      |      |      |       |       |
|--------------------------------------|-------------------------------------------------------|------|------|------|------|------|-------|-------|
| D55716                               | P1cdc47                                               | 1.6  | 0.8  | 1.0  | 0.8  | 2.4  | 2.8   | 5.1   |
| X05360                               | CDC2                                                  | 0.7  | 1.1  | 1.6  | 1.8  | 2.8  | 2.8   | 4.6   |
| U05340                               | p55CDC                                                | 1.5  | 1.0  | 1.3  | 1.0  | 1.7  | 4.0   | 4.5   |
| U77949                               | Cdc6-related protein (HsCDC6)                         | 0.8  | 0.8  | 0.6  | 5.5  | 3.5  | 4.1   | 4.5   |
| L13698                               | gas1                                                  | -0.8 | -0.8 | -2.0 | -1.8 | -1.5 | -2.8  | -10.6 |
| L13698                               | gas1                                                  | -0.9 | -0.8 | -2.2 | -2.1 | -1.5 | -3.7  | -8.6  |
| U22398                               | Cdk-inhibitor p57KIP2 (KIP2)                          | -1.4 | -0.9 | -0.9 | -1.7 | -2.3 | -3.0  | -5.9  |
| D64137                               | KIP2 gene for Cdk-inhibitor p57KIP2                   | -0.8 | -1.0 | -1.2 | -2.8 | -4.0 | -10.0 | -5.0  |
| U22398                               | Cdk-inhibitor p57KIP2 (KIP2)                          | -0.9 | -1.2 | -1.3 | -3.0 | -4.4 | -9.7  | -4.9  |
| <b>ECM/Cell Attachment</b>           |                                                       |      |      |      |      |      |       |       |
| D21255                               | OB-cadherin-2                                         | 0.5  | 3.4  | 1.2  | 4.3  | 5.6  | 1.8   | 19.2  |
| X97675                               | plakophilin 2a and b                                  | 1.9  | 1.0  | 2.0  | 3.0  | 3.8  | 5.2   | 8.6   |
| X17033                               | integrin alpha-2 subunit                              | 1.4  | 0.7  | 2.1  | 3.4  | 4.4  | 5.0   | 7.1   |
| U31201                               | laminin gamma2 chain (LAMC2)                          | 1.7  | 0.6  | 4.5  | 1.3  | 11.4 | 4.7   | 5.0   |
| U17760                               | laminin S B3 chain (LAMB3)                            | 1.0  | 0.9  | 1.1  | 1.0  | 1.8  | 2.2   | 4.7   |
| X53002                               | integrin beta-5 subunit                               | 1.0  | 1.2  | 1.1  | 1.9  | 4.0  | 7.1   | 4.6   |
| M30269                               | nidogen                                               | -3.2 | -1.6 | -4.9 | -2.5 | -2.2 | -6.3  | -8.7  |
| L22524                               | matrilysin                                            | -1.0 | -1.1 | -1.1 | -0.9 | -0.9 | -3.2  | -7.5  |
| <b>Cytoskeletal</b>                  |                                                       |      |      |      |      |      |       |       |
| X57527                               | alpha 1(VIII) collagen                                | 0.5  | 0.9  | 1.0  | 2.0  | 1.9  | 3.1   | 5.0   |
| M98776                               | keratin 1                                             | -2.4 | -0.8 | -0.7 | -1.5 | -2.0 | -5.1  | -14.3 |
| X07695                               | cytokeratin 4 C-terminal region                       | -2.0 | -0.9 | -1.3 | -1.2 | -1.6 | -3.0  | -7.1  |
| X07696                               | cytokeratin 15                                        | -1.6 | -0.9 | -0.7 | -1.3 | -1.4 | -1.7  | -6.2  |
| X14640                               | keratin 13                                            | -1.6 | -1.1 | -1.0 | -1.6 | -1.3 | -2.3  | -5.3  |
| Z24727                               | tropomyosin isoform                                   | -0.9 | -0.9 | -0.7 | -1.2 | -1.3 | -1.6  | -4.6  |
| AF023676                             | lamin B receptor homolog TM7SF2 (TM7SF2)              | -1.6 | -1.0 | -1.3 | -1.8 | -2.7 | -1.8  | -4.5  |
| <b>DNA Replication and Repair</b>    |                                                       |      |      |      |      |      |       |       |
| X90858                               | uridine phosphorylase                                 | 1.0  | 0.8  | 0.9  | 1.4  | 2.5  | 4.6   | 28.2  |
| AF017790                             | retinoblastoma-associated protein HEC                 | 1.2  | 2.0  | 1.3  | 0.7  | 2.9  | 10.1  | 16.3  |
| X62534                               | HMG-2                                                 | 1.6  | 1.5  | 0.5  | 1.3  | 2.6  | 5.8   | 11.1  |
| X74330                               | DNA primase (subunit p48)                             | 0.7  | 0.9  | 2.9  | 1.2  | 1.5  | 1.7   | 8.1   |
| U43746                               | Breast cancer susceptibility (BRCA2)                  | 0.4  | 1.3  | 1.6  | 0.8  | 1.6  | 3.2   | 6.7   |
| L78833                               | BRCA1, Rho7 and vat1 genes                            | 0.8  | 0.3  | 0.8  | 2.0  | 23.1 | 4.7   | 6.6   |
| AI375913                             | tc14c08.x1 Homo sapiens cDNA                          | 1.3  | 1.0  | 0.2  | 1.4  | 1.9  | 4.9   | 5.9   |
| L07541                               | Replication factor C, 38-kDa subunit                  | 1.2  | 0.9  | 0.6  | 1.2  | 3.4  | 2.8   | 5.6   |
| M87339                               | Replication factor C, 37-kDa subunit                  | 0.7  | 1.4  | 1.5  | 1.6  | 4.8  | 5.1   | 5.5   |
| X59618                               | small subunit ribonucleotide reductase                | 0.9  | 1.7  | 0.4  | 1.1  | 2.1  | 3.5   | 4.9   |
| J04088                               | DNA topoisomerase II                                  | 1.6  | 1.0  | 0.7  | 1.4  | 2.8  | 3.8   | 4.8   |
| U39817                               | Bloom s syndrome protein (BLM)                        | 0.3  | 0.7  | 1.8  | 0.4  | 13.2 | 11.8  | 4.7   |
| M60974                               | GADD45 Growth arrest and DNA-damage-inducible protein | 1.2  | 1.1  | 0.9  | 2.1  | 1.5  | 1.6   | 4.5   |
| U20980                               | Chromatin assembly factor-I p60 subunit               | 3.2  | 0.9  | 1.2  | 0.5  | 9.3  | 5.6   | 3.6   |
| U75679                               | Histone stem-loop binding protein (SLBP)              | 0.8  | 1.4  | 0.8  | 2.3  | 1.6  | 4.6   | 2.6   |
| <b>Mitotic Spindle Assembly</b>      |                                                       |      |      |      |      |      |       |       |
| Z15005                               | CENP-E                                                | 1.1  | 0.6  | 4.9  | 8.6  | 7.3  | 9.9   | 23.7  |
| D14678                               | kinesin-related protein                               | 1.3  | 0.3  | 1.2  | 2.1  | 4.8  | 0.8   | 11.1  |
| U14518                               | centromere protein-A (CENP-A)                         | 1.2  | 1.0  | 0.8  | 1.9  | 3.4  | 4.4   | 10.9  |
| U63743                               | mitotic centromere-associated kinesin                 | 1.6  | 1.4  | 0.1  | 0.2  | 7.6  | 4.9   | 10.9  |
| U65410                               | Mad2 (hsMAD2)                                         | 1.4  | 0.5  | 1.6  | 1.6  | 4.8  | 7.5   | 9.5   |
| X67155                               | mitotic kinesin-like protein-1                        | 1.5  | 2.5  | 0.4  | 1.8  | 6.0  | 3.3   | 8.2   |
| U30872                               | mitosis                                               | 1.1  | 0.8  | 0.8  | 0.6  | 1.1  | 5.1   | 5.7   |
| AF063308                             | coiled-coil related protein DEEPEST                   | 1.9  | 0.7  | 0.6  | 0.5  | 1.5  | 2.2   | 5.2   |
| D14678                               | kinesin-related protein                               | 1.7  | 1.3  | 1.7  | 1.4  | 2.7  | 3.7   | 5.0   |
| AF092563                             | chromosome-associated protein-E (hCAP-E)              | 0.5  | 1.0  | 1.4  | 5.5  | 1.5  | 5.1   | 3.4   |
| <b>Nuclear Membrane Organization</b> |                                                       |      |      |      |      |      |       |       |
| U18271                               | thymopoietin (TMPO)                                   | 4.4  | 0.7  | 1.8  | 1.0  | 2.0  | 2.5   | 6.7   |
| X54134                               | protein tyrosine phosphatase epsilon                  | 1.3  | 0.9  | 4.2  | 2.1  | 2.5  | 3.1   | 5.3   |
| L37747                               | lamin B1                                              | 1.9  | 1.3  | 1.3  | 2.0  | 3.8  | 4.4   | 5.2   |
| <b>Immune Function/Inflammation</b>  |                                                       |      |      |      |      |      |       |       |
| M69199                               | G0S2 protein                                          | 1.7  | 1.0  | 1.8  | 5.6  | 5.7  | 5.7   | 125.2 |
| U64197                               | chemokine exodus-1                                    | 1.3  | 1.1  | 1.4  | 2.1  | 0.7  | 1.6   | 46.4  |
| U04636                               | cyclooxygenase-2 (hCox-2)                             | 1.7  | 0.6  | 1.8  | 14.3 | 3.1  | 4.5   | 4.3   |
| M27492                               | interleukin 1 receptor                                | -1.1 | -0.6 | -1.2 | -0.7 | -1.9 | -3.1  | -8.3  |
| <b>Angiogenesis</b>                  |                                                       |      |      |      |      |      |       |       |

|          |                                           |      |      |      |      |      |      |      |
|----------|-------------------------------------------|------|------|------|------|------|------|------|
| M19481   | <i>folliculin</i>                         | 1.6  | 0.7  | 2.0  | 1.6  | 0.7  | 2.1  | 67.5 |
| M63978   | <i>vascular endothelial growth factor</i> | 2.5  | 0.5  | 2.8  | 2.0  | 2.2  | 1.2  | 18.5 |
| AF024710 | <i>vascular endothelial growth factor</i> | 1.4  | 0.8  | 1.0  | 1.8  | 1.4  | 1.1  | 5.8  |
| AF022375 | <i>vascular endothelial growth factor</i> | 1.0  | 0.9  | 1.4  | 1.8  | 1.4  | 1.9  | 4.9  |
| U83508   | angiopoietin-1                            | -1.0 | -0.6 | -1.3 | -1.0 | -1.0 | -2.8 | -5.4 |

### Metabolism

|          |                                             |      |      |      |      |      |       |       |
|----------|---------------------------------------------|------|------|------|------|------|-------|-------|
| U22233   | methylthioadenosine phosphorylase           | 0.6  | 1.1  | 0.9  | 2.3  | 2.2  | 2.3   | 6.8   |
| AL050290 | DKFZp586G1923                               | 1.0  | 1.1  | 1.0  | 1.2  | 1.2  | 3.4   | 5.2   |
| Z75190   | apolipoprotein E receptor 2                 | 1.6  | 1.7  | 1.5  | 4.4  | 7.8  | 2.4   | 3.6   |
| J04813   | cytochrome P450 PCN3                        | -0.8 | -1.1 | -1.6 | -1.2 | -2.6 | -2.7  | -27.5 |
| Z11793   | selenoprotein P                             | -2.1 | -1.1 | -1.7 | -0.6 | -1.5 | -3.5  | -9.1  |
| U26726   | 11-beta-hydroxysteroid dehydrogenase type 2 | -1.2 | -1.0 | -1.7 | -2.3 | -3.4 | -11.3 | -7.1  |
| M13699   | ceruloplasmin (ferroxidase)                 | -1.1 | -1.1 | -1.2 | -0.5 | -1.8 | -0.7  | -6.1  |
| AF020038 | NADP-dependent isocitrate dehydrogenase     | -1.3 | -1.0 | -1.5 | -1.2 | -1.9 | -1.9  | -5.8  |
| AF029893 | i-beta-1,3-N-acetylglucosaminyltransferase  | -1.3 | -0.7 | -1.7 | -2.3 | -1.0 | -1.6  | -5.4  |
| M68840   | monoamine oxidase A (MAOA)                  | -1.3 | -0.7 | -1.3 | -1.1 | -1.4 | -2.0  | -5.1  |
| X53463   | glutathione peroxidase-like protein         | -1.0 | -0.8 | -0.8 | -2.5 | -2.6 | -2.3  | -5.0  |
| M54994   | bile salt-activated lipase                  | -0.7 | -1.7 | -3.8 | -5.2 | -4.5 | -9.1  | -4.9  |
| AA420624 | nc61c12.r1 Homo sapiens cDNA                | -1.1 | -0.8 | -1.4 | -1.2 | -1.8 | -2.5  | -4.5  |
| AA420624 | nc61c12.r1 Homo sapiens cDNA                | -1.0 | -0.8 | -1.6 | -1.3 | -2.4 | -5.6  | -4.4  |
| X00129   | retinol binding protein (RBP)               | -0.3 | -1.4 | -8.3 | -1.2 | -1.6 | -3.3  | -4.0  |
| AF082868 | gamma butyrobetaine hydroxylase (BBH)       | -0.6 | -0.6 | -1.6 | -1.3 | -1.4 | -5.8  | -3.2  |
| U37519   | aldehyde dehydrogenase (ALDH8)              | -0.6 | -1.6 | -1.1 | -2.2 | -2.4 | -4.6  | -1.1  |

### Calcium and Bone Metabolism

|          |                                                        |      |      |      |      |      |      |      |
|----------|--------------------------------------------------------|------|------|------|------|------|------|------|
| J03802   | <i>renal carcinoma parathyrin hormone-like peptide</i> | 1.1  | 1.6  | 0.5  | 1.4  | 9.1  | 1.1  | 12.8 |
| AF098462 | stanniocalcin-related protein                          | 0.8  | 1.0  | 1.3  | 2.2  | 2.0  | 1.5  | 9.9  |
| X89066   | TRPC1 protein                                          | 1.2  | 0.9  | 1.2  | 1.5  | 0.8  | 4.2  | 8.0  |
| M24351   | <i>parathyroid hormone-like protein</i>                | 0.7  | 0.5  | 0.9  | 2.6  | 3.9  | 2.8  | 6.1  |
| M22488   | <i>bone morphogenetic protein 1 (BMP-1)</i>            | -0.3 | -1.3 | -1.7 | -3.2 | -2.1 | -4.8 | -1.6 |

### Transport

|          |                                                             |      |      |      |      |      |      |       |
|----------|-------------------------------------------------------------|------|------|------|------|------|------|-------|
| AF085692 | multidrug resistance-associated protein 3B (MRP3)           | 2.0  | 0.6  | 0.5  | 1.0  | 1.8  | 2.0  | 6.9   |
| L20859   | leukemia virus receptor 1 (GLVR1)                           | 0.9  | 1.0  | 3.3  | 4.0  | 3.5  | 4.1  | 5.4   |
| M55531   | glucose transport-like 5 (GLUT5)                            | -0.8 | -1.0 | -1.7 | -1.7 | -1.9 | -4.6 | -11.5 |
| AA128249 | zl29d09.r1 Homo sapiens cDNA                                | -0.7 | -0.6 | -1.6 | -0.8 | -1.5 | -1.7 | -9.8  |
| U49248   | canalicular multispecific organic anion transporter (cMOAT) | -1.0 | -0.9 | -2.7 | -1.2 | -1.6 | -1.4 | -6.4  |

### Other/Novel Functions

|          |                                                                      |     |     |      |      |      |      |       |
|----------|----------------------------------------------------------------------|-----|-----|------|------|------|------|-------|
| M60830   | EV12B3P gene                                                         | 7.0 | 0.8 | 0.6  | 5.7  | 4.0  | 8.1  | 104.7 |
| AF070641 | clone 24421 mRNA                                                     | 4.7 | 0.7 | 3.3  | 2.5  | 7.1  | 3.4  | 93.3  |
| Z50194   | PQ-rich protein                                                      | 1.2 | 1.0 | 11.2 | 12.9 | 3.8  | 9.4  | 42.4  |
| AL031985 | Human DNA sequence from clone 228H13 on chromosome 1p34.1-35.3       | 1.1 | 0.9 | 4.1  | 2.8  | 0.7  | 1.1  | 40.9  |
| D16532   | gene for very low density lipoprotein receptor                       | 0.4 | 0.9 | 0.6  | 1.2  | 0.9  | 5.5  | 24.2  |
| D26361   | KIAA0042                                                             | 2.9 | 1.0 | 1.3  | 1.7  | 6.2  | 9.3  | 19.4  |
| AB007870 | KIAA0410                                                             | 0.6 | 1.0 | 0.8  | 4.4  | 1.7  | 2.5  | 18.6  |
| AL049389 | DKFZp586O0118                                                        | 1.3 | 0.9 | 0.2  | 0.4  | 10.9 | 2.2  | 18.5  |
| D13633   | KIAA0008                                                             | 0.6 | 1.3 | 5.5  | 3.2  | 4.9  | 3.2  | 18.3  |
| X85750   | transcript associated with monocyte to macrophage differentiation    | 0.8 | 0.9 | 1.5  | 3.0  | 3.1  | 2.1  | 17.0  |
| AI743134 | wg87f07.x1 Homo sapiens cDNA                                         | 1.3 | 1.0 | 1.0  | 1.9  | 4.1  | 9.8  | 16.2  |
| AB018293 | KIAA0750                                                             | 1.2 | 0.4 | 2.6  | 1.4  | 1.3  | 2.5  | 15.4  |
| AL021977 | bK447C4.1 (novel MAFF (v-maf musculoaponeurotic fibrosarcoma (avian) | 0.9 | 1.4 | 5.2  | 4.8  | 6.0  | 9.9  | 13.8  |
| AL022325 | Homo sapiens DNA sequence from Fosmid 27C3 on chromosome 22q11.2-qte | 0.4 | 1.0 | 0.2  | 1.4  | 6.6  | 1.9  | 13.1  |
| X58377   | adipogenesis inhibitory factor                                       | 1.0 | 0.1 | 1.0  | 1.7  | 4.8  | 2.0  | 12.8  |
| D90070   | ATL-derived PMA-responsive (APR) peptide                             | 1.0 | 1.3 | 2.1  | 2.7  | 1.0  | 2.2  | 11.7  |
| D38553   | KIAA0074                                                             | 0.9 | 0.8 | 0.8  | 2.1  | 9.5  | 2.0  | 11.2  |
| AJ223728 | Porc-PI gene similar to yeast CDC45                                  | 0.2 | 0.8 | 1.0  | 1.7  | 6.7  | 14.0 | 8.7   |
| AB020651 | KIAA0844                                                             | 0.7 | 1.4 | 1.4  | 1.7  | 2.4  | 2.7  | 8.7   |
| AF032862 | intracellular hyaluronic acid binding protein (IHABP)                | 1.0 | 1.4 | 1.0  | 2.1  | 2.9  | 3.8  | 8.6   |
| S81914   | IEX-1                                                                | 1.0 | 1.2 | 3.5  | 3.1  | 3.7  | 4.7  | 8.5   |
| J02931   | placental tissue factor (two forms)                                  | 1.0 | 0.9 | 2.4  | 5.7  | 8.2  | 11.3 | 8.2   |
| X55740   | Human placental cDNA coding for 5nucleotidase (EC 3.1.3.5)           | 1.6 | 1.1 | 1.3  | 2.9  | 5.1  | 5.1  | 8.2   |
| L47276   | alpha topoisomer                                                     | 0.9 | 1.7 | 0.5  | 1.2  | 2.4  | 5.2  | 7.9   |
| W74442   | zd75e09.s1 Homo sapiens cDNA                                         | 0.6 | 1.3 | 0.8  | 0.4  | 2.6  | 15.7 | 7.7   |
| W26667   | 11a1 Homo sapiens cDNA                                               | 1.5 | 1.2 | 0.8  | 1.8  | 3.7  | 3.3  | 7.6   |
| U61836   | putative cyclin G1 interacting protein                               | 0.7 | 0.7 | 0.5  | 0.9  | 3.9  | 3.0  | 7.5   |
| D26579   | transmembrane protein                                                | 1.3 | 0.9 | 1.7  | 2.4  | 3.4  | 3.0  | 7.4   |

|          |                                                                                                            |      |      |      |      |       |       |       |
|----------|------------------------------------------------------------------------------------------------------------|------|------|------|------|-------|-------|-------|
| AL080110 | DKFZp586G1922                                                                                              | 1.6  | 1.4  | 1.1  | 1.8  | 1.8   | 2.2   | 6.6   |
| AB014551 | KIAA0651                                                                                                   | 1.3  | 0.6  | 2.1  | 1.4  | 2.2   | 1.7   | 6.6   |
| M21302   | small proline rich protein (sprl1)                                                                         | 0.7  | 1.1  | 0.6  | 1.1  | 2.5   | 1.7   | 6.5   |
| D87119   | GS3955                                                                                                     | 1.3  | 1.0  | 1.0  | 3.8  | 4.8   | 4.2   | 6.5   |
| AB024704 | fls353                                                                                                     | 1.1  | 1.3  | 0.9  | 1.1  | 2.5   | 4.5   | 6.4   |
| AB014458 | ubiquitin specific protease                                                                                | 1.2  | 1.0  | 1.2  | 1.9  | 2.2   | 3.7   | 6.3   |
| AC005192 | BAC clone RG163K11 from 7q31                                                                               | 0.8  | 0.9  | 0.8  | 1.4  | 1.6   | 1.2   | 6.3   |
| AA059408 | zl96e07.r1 Homo sapiens cDNA                                                                               | 0.9  | 1.5  | 0.9  | 2.6  | 1.7   | 2.3   | 6.2   |
| AA255502 | zr85b06.r1 Homo sapiens cDNA                                                                               | 1.4  | 1.2  | 0.5  | 0.6  | 2.5   | 6.6   | 6.0   |
| U96131   | HPV16 E1 protein binding protein                                                                           | 1.2  | 1.1  | 1.1  | 1.7  | 3.6   | 5.1   | 6.0   |
| U39487   | xanthine dehydrogenase/oxidase                                                                             | 1.0  | 0.9  | 0.9  | 1.7  | 3.0   | 3.1   | 6.0   |
| AF049910 | TACC1                                                                                                      | 1.2  | 1.6  | 0.8  | 1.9  | 2.0   | 3.4   | 6.0   |
| AL031781 | dJ51J12.1.3 human ortholog of mouse KH Domain RNA Binding protein Q                                        | 1.3  | 1.2  | 1.7  | 2.1  | 2.5   | 4.4   | 5.9   |
| L36055   | 4E-binding protein 1                                                                                       | 2.1  | 1.3  | 1.4  | 1.3  | 3.5   | 3.8   | 5.8   |
| D87119   | GS3955                                                                                                     | 1.7  | 1.0  | 1.6  | 3.6  | 3.3   | 4.6   | 5.8   |
| AB019987 | chromosome-associated polypeptide-C                                                                        | 1.2  | 1.0  | 0.9  | 1.7  | 2.3   | 4.2   | 5.7   |
| D79997   | KIAA0175                                                                                                   | 0.9  | 1.2  | 1.3  | 1.2  | 2.0   | 2.9   | 5.5   |
| M20560   | lipocortin-III                                                                                             | 0.8  | 0.7  | 0.7  | 1.6  | 2.2   | 2.8   | 5.3   |
| M93056   | monocyte/neutrophil elastase inhibitor                                                                     | 0.8  | 0.9  | 1.6  | 1.4  | 1.3   | 3.3   | 4.9   |
| AA151971 | zo30b03.r1                                                                                                 | 1.7  | 0.8  | 0.9  | 0.5  | 1.2   | 2.7   | 4.9   |
| D79987   | KIAA0165                                                                                                   | 1.4  | 0.9  | 0.6  | 1.2  | 2.1   | 1.9   | 4.8   |
| AF061258 | LIM protein                                                                                                | 1.1  | 1.3  | 1.6  | 1.6  | 2.0   | 1.3   | 4.8   |
| U75285   | survivin                                                                                                   | 2.4  | 1.9  | 2.4  | 1.2  | 2.1   | 1.5   | 4.7   |
| X16354   | mRNA for transmembrane carcinoembryonic antigen<br>Spermidine/Spermine N1-Acetyltransferase, Alt. Splice 2 | 0.1  | 1.1  | 3.3  | 1.1  | 2.6   | 8.6   | 4.6   |
| AC005053 | BAC clone RG041D11 from 7q21                                                                               | 0.8  | 0.9  | 1.6  | 2.4  | 1.6   | 1.3   | 4.6   |
| U04735   | microsomal stress 70 protein ATPase core                                                                   | 0.9  | 1.4  | 2.4  | 2.2  | 2.0   | 2.4   | 4.6   |
| X71345   | trypsinogen IV b-form                                                                                      | 0.6  | 1.8  | 0.9  | 1.2  | 2.0   | 1.9   | 4.6   |
| AL080123 | cDNA DKFZp569D2231                                                                                         | 0.9  | 0.8  | 2.3  | 2.5  | 9.0   | 1.8   | 2.8   |
| Z34897   | H1 histamine receptor                                                                                      | 0.6  | 0.6  | 3.6  | 1.0  | 4.6   | 1.8   | 2.8   |
| AA398463 | zt62e11.s1                                                                                                 | 0.7  | 0.6  | 0.6  | 5.7  | 2.1   | 1.0   | 2.5   |
| AB006624 | KIAA0286                                                                                                   | 1.3  | 1.5  | 5.2  | 1.1  | 6.5   | 4.1   | 2.5   |
| X17094   | furin                                                                                                      | 1.7  | 1.1  | 1.6  | 1.2  | 4.6   | 2.0   | 1.8   |
| Y17782   | heat shock protein B3                                                                                      | -1.1 | -0.8 | -0.9 | -6.3 | -16.1 | -6.5  | -40.3 |
| AI040379 | ox16c05.x1 Homo sapiens cDNA                                                                               | -2.0 | -0.4 | -1.5 | -0.8 | -1.5  | -1.3  | -29.6 |
| M68516   | protein C inhibitor                                                                                        | -1.0 | -1.1 | -2.8 | -1.5 | -3.3  | -5.4  | -29.3 |
| AF035282 | Homo sapiens clone 23703                                                                                   | -0.9 | -0.4 | -3.0 | -1.7 | -2.5  | -3.3  | -22.4 |
| AF070596 | clone 24796                                                                                                | -2.0 | -0.7 | -0.8 | -1.4 | -0.9  | -1.3  | -12.2 |
| W26407   | 29b8 Homo sapiens cDNA                                                                                     | -1.4 | -0.6 | -1.1 | -0.9 | -1.6  | -2.0  | -9.2  |
| AL050159 | DKFZp586A0522                                                                                              | -1.2 | -0.8 | -0.9 | -1.1 | -2.5  | -2.4  | -9.1  |
| W28612   | 49b3 Homo sapiens cDNA                                                                                     | -1.1 | -0.5 | -1.3 | -1.7 | -1.7  | -2.9  | -8.7  |
| U15590   | heat shock 17kD protein 3                                                                                  | -1.0 | -1.1 | -1.2 | -1.5 | -2.3  | -4.1  | -8.5  |
| AF039656 | neuronal tissue-enriched acidic protein (NAP-22)                                                           | -1.4 | -0.8 | -1.3 | -1.6 | -1.3  | -1.4  | -6.7  |
| U16799   | Na,K-ATPase beta-1 subunit                                                                                 | -0.9 | -0.7 | -2.4 | -1.5 | -2.6  | -3.6  | -6.6  |
| D13891   | ld-2H                                                                                                      | -0.8 | -1.7 | -1.5 | -1.9 | -2.7  | -5.6  | -6.5  |
| X76534   | NMB                                                                                                        | -1.2 | -0.8 | -2.1 | -1.3 | -1.8  | -3.0  | -6.4  |
| AB011147 | KIAA0575 protein                                                                                           | -0.9 | -0.6 | -1.5 | -1.5 | -1.3  | -3.6  | -5.6  |
| W28281   | 47e7 Homo sapiens cDNA                                                                                     | -1.1 | -0.9 | -1.1 | -1.7 | -3.9  | -4.7  | -4.9  |
| AL038340 | DKFZp566K192                                                                                               | -1.2 | -1.1 | -1.7 | -1.9 | -2.3  | -3.8  | -4.9  |
| AB020685 | KIAA0878 protein                                                                                           | -0.4 | -1.1 | -3.3 | -1.4 | -2.4  | -24.5 | -4.6  |
| AA902713 | ok71f11.s1 Homo sapiens cDNA                                                                               | -1.0 | -1.4 | -1.9 | -1.6 | -2.8  | -2.1  | -4.6  |
| AJ001258 | NIPSNAP1                                                                                                   | -1.0 | -1.1 | -1.3 | -1.4 | -1.6  | -2.0  | -4.5  |
| AF014402 | type-2 phosphatidic acid phosphatase alpha-1 (PAP2-a1)                                                     | -1.0 | -1.0 | -3.2 | -2.6 | -3.5  | -3.7  | -4.5  |
| U90548   | butyrophillin (BTF3)                                                                                       | -0.7 | -1.1 | -1.6 | -1.4 | -1.7  | -4.8  | -2.9  |
| AL022238 | dJ1042K10.3 (novel protein)                                                                                | -1.0 | -0.8 | -1.0 | -6.2 | -2.0  | -3.2  | -2.1  |

<sup>1</sup>Genbank accession numbers, gene annotation and fold change in mRNA abundance for rAd MEK1EE relative to rAd LacZ infected MCF-12A cells is shown for the time points indicated.

<sup>2</sup>Genes are grouped according to cellular function as reported in GeneCards (Rebhan, M., Chalifa-Caspi, V., Prilusky, J., Lancet, D.: GeneCards: encyclopedia for genes, proteins and diseases. Weizmann Institute of Science, Bioinformatics Unit and Genome Center (Rehovot, Israel), 1997. <http://bioinformatics.weizmann.ac.il/cards>

<sup>3</sup>Positive numbers indicate fold up-regulation and negative numbers indicate fold down regulation.

Genes referred to in the text are in italics

**Table S5. Analysis of promoters of genes coordinately up-regulated and containing Myc and E2F binding sites.** Genes encoding mRNAs coordinately up regulated by expression of MEK1EE and ERK1,2 activation (Group A Figure 3B) are listed. The Genbank accession number (column 1) corresponding to the element on Affymetrix U95A and gene annotation (column 2 from Affymetrix) are provided. The location of the Myc binding sites (relative to the start ATG) are listed in column 4. The last column lists the location of the binding sites for E2F (relative to the start ATG).

**Supplemental Table 5**  
**Promoter Analysis of Group A Up-regulated Genes**

| Original ID | Affymetrix Gene Annotation                          | Seq id    | Myc Sites                                                              | E2F Sites           |
|-------------|-----------------------------------------------------|-----------|------------------------------------------------------------------------|---------------------|
| AB000449    | VRK1                                                | NM_003384 | -1010                                                                  |                     |
| AB002345    | KIAA0347                                            | NM_022817 | -608 -1759 -1760                                                       |                     |
| AB002803    | BACH1                                               | NM_001186 | -450 -451 -849 -1040                                                   |                     |
| AB006537    | interleukin 1 receptor accessory protein            | NM_002182 | -293 -343                                                              |                     |
| AB006624    | KIAA0286                                            | NM_004354 | -80 -196 -197 -328 -673 -822 -1396                                     |                     |
| AB006746    | hMmTRA1b                                            | NM_021105 | -255                                                                   |                     |
| AB007448    | OCTN1                                               | NM_003059 | -239 -312 -313 -393 -469 -471 -565                                     | -1103               |
| AB007865    | KIAA0405                                            | NM_013231 | -32 -1346                                                              |                     |
| AB007870    | KIAA0410                                            | NM_014778 | -56 -536 -1341 -1404                                                   |                     |
| AB007893    | KIAA0433                                            | NM_015216 | -799                                                                   |                     |
| AB011167    | KIAA0595                                            | AF325193  | -127                                                                   |                     |
| AB011420    | DRAK1                                               | NM_004760 | -57 -93 -149 -234 -429 -430 -501 -502                                  |                     |
| AB014551    | KIAA0651                                            | NM_004723 | -125                                                                   |                     |
| AB014587    | KIAA0687                                            | AC005035  | -40 -197 -1388 -1846 -1847                                             |                     |
| AB015132    | UKLF                                                | NM_003709 | -841 -919                                                              |                     |
| AB018259    | KIAA0716                                            | NM_014705 | -323 -324 -1514                                                        |                     |
| AB018273    | KIAA0730                                            | AF193556  | -1373 -1374                                                            | -1753               |
| AB019987    | chromosome-associated polypeptide-C                 | NM_005496 | -1768                                                                  |                     |
| AB020651    | KIAA0844                                            | NM_014951 | -144                                                                   |                     |
| AB020684    | KIAA0877                                            | NM_014896 | -1463                                                                  |                     |
| AB023158    | KIAA0941 )                                          | NM_014904 | -1008 -1491                                                            |                     |
| AB023203    | KIAA0986                                            | NM_015186 | -242 -414                                                              | -44                 |
| AB024704    | fs353                                               | AB024704  | -1136                                                                  |                     |
| AB028021    | HNF-3beta hepatocyte nuclear factor-3 beta          | AB028021  | -822 -939 -956                                                         |                     |
| AB028069    | activator of S phase Kinase                         | NM_006716 | -398                                                                   |                     |
| AB028969    | KIAA1046                                            | NM_014928 | -1214 -1681 -1828                                                      |                     |
| AB029001    | KIAA1078                                            | NM_016357 | -1399                                                                  |                     |
| AC005192    | BAC clone RG163K11                                  | BC001272  | -172 -1278                                                             |                     |
| AF001294    | IPL (IPL)                                           | NM_003311 | -11 -104 -106 -247 -619 -707 -708                                      |                     |
| AF001461    | Kruppel-like zinc finger protein Zf9                | NM_001300 | -43 -149 -306 -430 -623                                                |                     |
| AF006513    | CHD1                                                | NM_001270 | -1610                                                                  |                     |
| AF011468    | serine/threonine kinase (BTAK)                      | NM_003600 | -160 -633 -1589                                                        |                     |
| AF017790    | retinoblastoma-associated protein HEC               | NM_006101 | -1480                                                                  |                     |
| AF020043    | chromosome-associated polypeptide (HCAP)            | AF020043  | -51 -284 -379 -380 -439                                                | -325                |
| AF022375    | vascular endothelial growth factor                  | AF022375  | -381 -597                                                              |                     |
| AF039945    | synaptojanin 2B                                     | AF318616  | -148 -178 -275 -279 -546 -704 -705 -787 -788                           |                     |
| AF041037    | novel antagonist of FGF signaling (sprouty-1)       | AJ271735  | -100                                                                   |                     |
| AF049910    | TACC1                                               | NM_006283 | -121 -161                                                              |                     |
| AF051152    | Toll/interleukin-1 receptor-like protein 4 (TIL4)   | AF051152  | -1890                                                                  |                     |
| AF059611    | nuclear matrix protein NRP/B                        | NM_003633 | -53 -795 -796 -797 -980 -1020 -1021 -1382                              |                     |
| AF063308    | coiled-coil related protein DEEPEST                 | NM_006461 | -1968                                                                  |                     |
| AF085692    | multidrug resistance-associated protein 3B          | NM_020038 | -574 -890 -1340 -1895 -1896                                            |                     |
| AF091433    | cyclin E2                                           | NM_004702 | -1200 -1208 -1366 -1696 -1700                                          |                     |
| AF092563    | chromosome-associated protein-E (hCAP-E)            | NM_006444 | -1341                                                                  |                     |
| AF098462    | stanniocalcin-related protein                       | NM_003714 | -311 -622 -905 -1163 -1469 -1588 -1621 -1688                           |                     |
| D13633      | KIAA0008                                            | NM_014750 | -1324 -1325                                                            |                     |
| D13645      | KIAA0020                                            | NM_014878 | -1010                                                                  |                     |
| D14657      | KIAA0101                                            | NM_014736 | -59 -1435 -1904                                                        |                     |
| D16532      | gene very low density lipoprotein receptor          | D16493    | -437 -1076                                                             |                     |
| D21063      | KIAA0030                                            | BC007670  | -833 -919 -920 -1088 -1722                                             | -900 -904           |
| D25538      | KIAA0037                                            | NM_001114 | -702 -703                                                              |                     |
| D26361      | KIAA0042                                            | NM_014875 | -1402                                                                  |                     |
| D26488      | KIAA0007                                            | BC008594  | -1428 -1635 -1645                                                      |                     |
| D26579      | transmembrane protein                               | NM_001109 | -888 -1152 -1233 -1321 -1382 -1576 -1964                               |                     |
| D38553      | KIAA0074                                            | AF363689  | -88 -126 -233 -254 -355 -446 -580 -703 -729 -731 -990 -992 -1031 -1166 |                     |
| D42055      | KIAA0093                                            | NM_015277 | -808                                                                   |                     |
| D63881      | KIAA0160                                            | NM_015355 | -145 -760                                                              |                     |
| D79986      | KIAA0164                                            | NM_014739 | -113 -1413                                                             |                     |
| D79987      | KIAA0165                                            | NM_012291 | -533 -788                                                              |                     |
| D79997      | KIAA0175                                            | NM_014791 | -56 -87 -232 -233 -419 -456 -1649                                      |                     |
| D84557      | HsMcm6                                              | NM_005915 |                                                                        | -102 -106 -164 -168 |
| D86956      | KIAA0201                                            | D86956    | -80 -81                                                                |                     |
| D86959      | KIAA0204                                            | NM_014720 | -113 -145 -161 -169 -192 -198 -376 -1752 -1753                         |                     |
| D87119      | GS3955                                              | NM_021643 | -1921                                                                  |                     |
| D87448      | KIAA0259                                            | NM_007027 | -826                                                                   | -814                |
| D87953      | RTP                                                 | D87953    | -499 -1291 -1292                                                       |                     |
| D88357      | CDC2 delta T                                        | D88357    | -209                                                                   |                     |
| J02931      | placental tissue factor                             | J02931    | -27 -29                                                                |                     |
| J03802      | renal carcinoma parathyrin hormone-like peptide     | NM_002820 | -360 -362 -401 -442                                                    |                     |
| J04027      | plasma membrane Ca2+ pumping ATPase                 | NM_001682 | -880                                                                   |                     |
| K02581      | thymidine kinase                                    | NM_003258 | -133 -151 -310 -1847                                                   |                     |
| L07541      | replication factor C, 38-kDa subunit                | NM_002915 | -282                                                                   |                     |
| L20826      | I-plastin                                           | NM_002670 | -507 -635 -1304 -1830                                                  |                     |
| L38933      | GT198                                               | L38933    | -859 -1820                                                             |                     |
| L76937      | Werner syndrome gene                                | L76937    | -356 -898                                                              |                     |
| M14083      | beta-migrating plasminogen activator inhibitor I    | NM_000602 | -1859 -1860 -1934 -1974 -1975                                          |                     |
| M18728      | nonspecific crossreacting antigen                   | M18728    | -106 -107                                                              |                     |
| M19481      | folliculin gene                                     | NM_006350 | -105 -753 -1854                                                        |                     |
| M23379      | GTPase-activating protein ras p21 (RASA)            | NM_002890 | -173 -772                                                              |                     |
| M25077      | SS-A/Ro ribonucleoprotein autoantigen 60 kd subunit | M25077    | -1083 -1963                                                            |                     |
| M25753      | cyclin B                                            | NM_031966 | -133 -134                                                              |                     |
| M26326      | keratin 18                                          | NM_000224 | -23 -1678                                                              |                     |
| M30704      | amphiregulin (AR)                                   | NM_001657 | -124 -1077                                                             |                     |

| Original ID | Affymetrix Gene Annotation                              | Seq id     | Myc Sites                                                                            | E2F Sites |
|-------------|---------------------------------------------------------|------------|--------------------------------------------------------------------------------------|-----------|
| M31516      | decay-accelerating factor                               | NM_000574  | -35 -394 -980 -981 -1104 -1105                                                       |           |
| M36820      | cytokine (GRO-beta)                                     | NM_002089  | -594                                                                                 |           |
| M37197      | CCAAT-box-binding factor (CBF)                          | NM_005760  | -13 -229 -387 -1168                                                                  |           |
| M37583      | histone (H2A.Z)                                         | NM_002106  | -315 -316 -355 -397 -398                                                             |           |
| M60278      | heparin-binding EGF-like growth factor                  | NM_001945  | -494 -836 -837 -1743                                                                 |           |
| M60830      | EV12B3P                                                 | M60830     | -363                                                                                 |           |
| M61199      | cleavage signal 1 protein                               | NM_006751  | -1429 -1430 -1491                                                                    |           |
| M62831      | transcription factor ETR101                             | NM_004907  | -862 -863                                                                            |           |
| M63180      | threonyl-tRNA synthetase                                | NM_003191  | -252 -511 -1766                                                                      |           |
| M63978      | vascular endothelial growth factor                      | M63978     | -51 -267 -1693                                                                       |           |
| M69199      | G0S2                                                    | M69199     | -183 -248 -487 -488 -1885 -1915 -1916                                                |           |
| M92843      | zinc finger transcriptional regulator                   | NM_003407  | -313 -860 -1257                                                                      |           |
| M95178      | non-muscle alpha-actinin                                | M95178     | -520 -945                                                                            |           |
| M97856      | histone-binding protein                                 | NM_002482  | -33                                                                                  |           |
| U01038      | pLK                                                     | U01038     | -93 -181 -182 -1728 -1830                                                            |           |
| U04735      | microsomal stress 70 protein ATPase core                | U04735     | -1748 -1932                                                                          |           |
| U05340      | p55CDC                                                  | NM_001255  | -1276                                                                                |           |
| U07802      | Tis11d                                                  | U07802     | -572 -603 -1441 -1520                                                                |           |
| U08021      | nicotinamide N-methyltransferase (NNMT)                 | NM_006169  | -149                                                                                 |           |
| U13220      | Forkhead protein FREAC-2                                | NM_001452  | -1389                                                                                |           |
| U17077      | BENE                                                    | BC003179   | -371 -372                                                                            |           |
| U18271      | thymopoietin (TMPO)                                     | U18271     | -916                                                                                 |           |
| U20980      | chromatin assembly factor-I p60 subunit                 | NM_005441  | -476 -478 -690 -712 -1919                                                            |           |
| U22233      | methylothioadenosine phosphorylase (MTAP)               | U22233     | -824                                                                                 |           |
| U29185      | prion protein (PrP) gene                                | U29185     | -31                                                                                  |           |
| U30872      | mitosin                                                 | NM_016343  | -964                                                                                 |           |
| U31556      | transcription factor E2F-5                              | U31556     | -357 -417                                                                            |           |
| U41387      | Gu protein                                              | NM_004728  | -96 -1314                                                                            |           |
| U55206      | gamma-glutamyl hydrolase                                | NM_003878  | -205 -593                                                                            |           |
| U59877      | low-Mr GTP-binding protein (RAB31)                      | NM_006868  | -1127                                                                                |           |
| U63743      | mitotic centromere-associated kinesin                   | NM_006845  | -56 -180 -778                                                                        |           |
| U64197      | chemokine exodus-1                                      | U64197     | -100 -496 -497 -681 -1321 -1322                                                      |           |
| U67058      | proteinase activated receptor-2                         | NM_025028  | -436 -453 -667 -668 -1113 -1114                                                      |           |
| U72514      | C2f                                                     | U72514     | -604 -984 -1470 -1471                                                                |           |
| U75285      | apoptosis inhibitor survivin                            | NM_001168  | -129 -141 -1209 -1714                                                                |           |
| U75679      | histone stem-loop binding protein (SLBP)                | NM_006527  | -81 -373 -584                                                                        |           |
| U77914      | soluble protein Jagged                                  | NM_000214  | -19 -398                                                                             |           |
| U77949      | Cdc6-related protein (HsCDC6)                           | U77949     | -1625                                                                                | -8        |
| U78722      | zinc finger protein 165 (Zfp165)                        | NM_003447  | -441                                                                                 |           |
| U79263      | clone 23760                                             | BC005197   | -406                                                                                 |           |
| U79267      | clone 23840                                             | NM_005134  | -45 -47 -143 -807                                                                    |           |
| U81262      | LERK5 (LERK5)                                           | NM_004093  | -188 -203 -207 -324 -450 -537 -601 -746 -779 -837 -930 -1140 -1420 -1475 -1533 -1534 |           |
| U90030      | bicaudal-D (BICD)                                       | NM_001714  | -441 -544 -546 -629 -1966                                                            |           |
| U92315      | hydroxysteroid sulfotransferase SULT2B1b (HSST2)        | U92315     | -403                                                                                 |           |
| U93868      | RNA polymerase III subunit (RPC32)                      | NM_006467  | -28 -152 -329 -599 -869 -870 -911                                                    |           |
| U96131      | HPV16 E1 protein binding protein                        | NM_004237  | -14 -16 -237 -312 -355 -395 -415 -459 -1008 -1290 -1299                              |           |
| U97067      | alpha-catenin-like protein                              | NM_003798  | -233 -334 -1667                                                                      |           |
| V00568      | c-myc oncogene                                          | NM_002467  | -414                                                                                 |           |
| X05908      | lipocortin                                              | NM_000700  | -1957                                                                                |           |
| X06256      | integrin alpha 5 subunit                                | NM_002205  | -1872 -1939                                                                          |           |
| X15804      | alpha-actinin                                           | X15804     | -431 -856                                                                            |           |
| X15998      | the chondroitin sulphate proteoglycan versican          | NM_004385  | -1027 -1554                                                                          |           |
| X16277      | gene ornithine decarboxylase ODC (EC 4.1.1.17)          | NM_002539  | -208 -210 -344 -494 -495 -962                                                        |           |
| X51688      | cyclin A                                                | NM_001237  | -341                                                                                 |           |
| X52015      | interleukin-1 receptor antagonist                       | X52015     | -393 -1661                                                                           |           |
| X54942      | ckshs2 Cks1 protein homologue                           | NM_001827  | -277 -727 -1186 -1187                                                                |           |
| X55740      | placental cDNA coding 5nucleotidase (EC 3.1.3.5)        | NM_002526  | -121 -347                                                                            |           |
| X58377      | adipogenesis inhibitory factor                          | NM_000641  | -299 -645                                                                            |           |
| X62534      | HMG-2                                                   | X62534     | -64                                                                                  | -1234     |
| X63741      | pilot /cds=(353,1516) /gb=X63741 /gi=35472 /ug=Hs.74088 | X63741     | -1925 -1926                                                                          |           |
| X64229      | dek /cds=(33,1160) /gb=X64229 /gi=30502 /ug=Hs.110713 / | NM_003472  | -229 -423 -480 -513 -618 -715 -717                                                   |           |
| X67155      | mitotic kinesin-like protein-1                          | X67155     | -380 -1360 -1361 -1689 -1819                                                         |           |
| X68487      | A2b adenosine receptor                                  | NM_000676  | -448 -559 -560 -1824 -1825                                                           |           |
| X68742      | integrin, alpha subunit                                 | NM_003637  | -603 -1474 -1475                                                                     |           |
| X71345      | trypsinogen IV b-m                                      | X71345     | -1538                                                                                |           |
| X84373      | nuclear factor RIP140                                   | NM_003489  | -825 -1941                                                                           |           |
| X90858      | uridine phosphorylase                                   | NM_003364  | -350 -351 -1091 -1266                                                                |           |
| X96381      | erm gene                                                | NM_004454  | -1293                                                                                |           |
| X97675      | plakophilin 2a and b                                    | NM_004572  | -147 -201 -253 -386 -1458                                                            |           |
| X98172      | MACH-alpha-1 protein                                    | X98172     | -1106                                                                                |           |
| X98260      | M-phase phosphoprotein, mpp11                           | AC004668_2 | -59 -93                                                                              |           |
| X98263      | M-phase phosphoprotein, mpp6                            | NM_005792  | -1690                                                                                |           |
| Y00272      | cell cycle control gene CDC2                            | NM_001786  | -1350                                                                                |           |
| Y00630      | Arg-Serpin (plasminogen activator-inhibitor 2, PAI-2)   | NM_002575  | -1880                                                                                | -117      |
| Y09631      | PIBF1 protein                                           | NM_006346  | -364 -1091 -1415 -1907                                                               |           |
| Y10746      | protein containing MBD 1                                | NM_015847  | -128 -557 -559 -605 -766 -1391                                                       |           |
| Z15005      | CENP-E                                                  | NM_001813  | -66 -67                                                                              |           |
| Z36715      | Net transcription factor                                | NM_005230  | -12 -164 -185 -278 -280                                                              |           |
| Z50194      | PQ-rich protein                                         | NM_007350  | -429                                                                                 |           |
| Z97029      | ribonuclease H I large subunit                          | NM_006397  | -124 -1618                                                                           |           |
| D14678      | kinesin-related protein                                 | BC000712   | -365 -526 -527                                                                       |           |
| D55716      | P1cdc47                                                 | D55716     | -13 -14                                                                              |           |
| D87119      | GS3955                                                  | NM_021643  | -1921                                                                                |           |
| J04088      | DNA topoisomerase II (top2)                             | NM_001067  | -841                                                                                 |           |
| L05624      | MAP kinase kinase                                       | L05624     | -45 -110 -314 -694                                                                   |           |
| L16782      | putative M phase phosphoprotein 1 (MPP1)                | NM_016195  | -1399                                                                                | -1563     |
| L20859      | leukemia virus receptor 1 (GLVR1)                       | NM_005415  | -59 -138 -139 -164 -199 -240                                                         | -213      |

| Original ID | Affymetrix Gene Annotation                                     | Seq id    | Myc Sites                             | E2F Sites |
|-------------|----------------------------------------------------------------|-----------|---------------------------------------|-----------|
| L25876      | protein tyrosine phosphatase (CIP2)                            | L25876    | -766 -1043 -1363 -1364 -1625          |           |
| L25931      | lamin B receptor (LBR)                                         | NM_002296 | -893                                  |           |
| M15205      | thymidine kinase                                               | NM_003258 | -133 -151 -310 -1847                  |           |
| M16750      | pim-1 oncogene                                                 | M16750    | -237 -438 -578 -580 -765 -1280        | -742      |
| M23379      | GTPase-activating protein ras p21 (RASA)                       | NM_002890 | -173 -772                             |           |
| M25753      | cyclin B                                                       | NM_031966 | -133 -134                             |           |
| M29039      | transactivator (jun-B)                                         | NM_002229 | -188 -211 -269 -1725                  |           |
| M33764      | ornithine decarboxylase                                        | NM_002539 | -208 -210 -344 -494 -495 -962         |           |
| M37197      | CCAAT-box-binding factor (CBF)                                 | NM_005760 | -13 -229 -387 -1168                   |           |
| M59911      | integrin alpha-3 chain                                         | NM_002204 | -1274                                 |           |
| M60527      | deoxycytidine kinase                                           | NM_000788 | -9 -118 -143 -144 -165 -167 -200      |           |
| M68520      | cdc2-related protein kinase                                    | M68520    | -1368 -1747                           |           |
| M81933      | cdc25A                                                         | NM_001789 | -1333                                 | -61       |
| M86699      | kinase (TTK)                                                   | NM_003318 | -535                                  |           |
| M93425      | protein tyrosine phosphatase (PTP-PEST)                        | M93425    | -427 -463                             |           |
| S62539      | insulin receptor substrate-1                                   | NM_005544 | -27 -28 -114 -382 -1890 -1891         |           |
| S78187      | CDC25Hu2                                                       | S78187    | -453 -1920                            |           |
| S81914      | radiation-inducible immediate-early gene                       | S81914    | -457                                  |           |
| U03911      | mutator gene (hMSH2)                                           | U03911    | -226 -1284                            |           |
| U04636      | cyclooxygenase-2 (hCox-2) gene,                                | NM_000963 | -55                                   |           |
| U15932      | dual-specificity protein phosphatase                           | U15932    | -147 -1480 -1481                      |           |
| U28042      | DEAD box RNA helicase-like protein                             | U28042    | -82 -1351 -1352                       |           |
| U31556      | transcription factor E2F-5                                     | U31556    | -357 -417                             |           |
| U39817      | Bloom s syndrome protein (BLM)                                 | NM_000057 | -1587 -1680 -1681                     |           |
| U43746      | breast cancer susceptibility (BRCA2)                           | NM_000059 | -21 -1594 -1964                       |           |
| U48807      | MAP kinase phosphatase (MKP-2)                                 | U48807    | -68 -217 -398 -671 -851 -1551 -1699   | -774      |
| U61167      | SH3 domain-containing protein SH3P18                           | U61167    | -1496                                 |           |
| U65410      | Mad2 (hsMAD2)                                                  | U65410    | -432                                  |           |
| U66838      | cyclin A1                                                      | NM_003914 | -913 -1083                            |           |
| U81787      | Wnt10B                                                         | NM_003394 | -975 -1385 -1973                      |           |
| AF024710    | vascular endothelial growth factor                             | AF022375  | -381 -597                             |           |
| AB011004    | HuUAP1 UDP-N-acetylglucosamine pyrophosphorylase               | NM_003115 | -533 -890 -891 -1236                  |           |
| AB022718    | DEPP (decidual protein induced by progesterone                 | NM_007021 | -848 -849 -1395 -1454 -1893           |           |
| AF032862    | intracellular hyaluronic acid binding protein (IHABP)          | NM_012484 | -499 -1292                            |           |
| AF052102    | clone 23926                                                    | NM_021145 | -275                                  | -106      |
| AF052143    | clone 24466                                                    | NM_018836 | -12 -28 -41 -138 -474 -577 -625 -1278 | -594      |
| AF052178    | clone 24523                                                    | NM_019005 | -244 -310 -809 -1265                  |           |
| AF070559    | clone 24463                                                    | AF279143  | -355 -1273                            |           |
| AL031985    | DNA sequence from clone 228H13                                 | NM_023070 | -414 -839                             |           |
| AL049382    | DKFZp586K1318                                                  | NM_014684 | -1126                                 |           |
| AL049389    | DKFZp586O0118                                                  | NM_032827 | -389 -390 -526 -1656 -1887            |           |
| AL049415    | DKFZp586N2119                                                  | NM_033274 | -39                                   |           |
| AL049951    | DKFZp564O0122                                                  | BC012132  | -458 -1201                            |           |
| AL050151    | DKFZp586J0720                                                  | NM_032035 |                                       | -1860     |
| AL080110    | DKFZp586G1922                                                  | BC011620  | -643 -1507 -1508 -1806 -1807          |           |
| AL080123    | DKFZp569D2231                                                  | BC007256  | -193 -236 -237                        |           |
| AL080235    | DKFZp586E1621                                                  | NM_006236 | -1916                                 |           |
| M23161      | transposon-like element                                        | NM_024343 | -799                                  |           |
| M93056      | monocyte/neutrophil elastase inhibitor sequence                | BC009015  | -380 -381                             |           |
| U05875      | clone pSK1 interferon gamma receptor accessory factor-1 (AF-1) | NM_005534 | -620                                  |           |
| U74612      | hepatocyte nuclear factor-3/k head homolog 11A (HFN-11A)       | U74612    | -1056                                 |           |
| U79256      | clone 23719                                                    | NM_032900 | -388 -395                             |           |
| X16396      | NAD-dependent methylene tetrahydrofolate dehydrogenase         | X16396    | -684                                  |           |
| X16901      | RAP30 subunit of transcription initiation factor RAP30/        | NM_004128 | -1539                                 |           |
| X85750      | transcript associated with monocyte to macrophage d            | NM_012329 | -617 -1846                            |           |
| Y10313      | IFRD1 (PC4) interferon-related developmental regulat           | NM_001550 | -167 -1273                            |           |
| Z24724      | polyA site DNA                                                 | AK001951  | -278                                  |           |
| Z93930      | DNA sequence from clone 292E10 on chromosome 22q11-12.         | NM_005080 | -63 -1707 -1805 -1806                 |           |
| M24351      | parathyroid hormone-like protein                               | M17183    | -828 -830 -869 -910                   |           |
| M34057      | transforming growth factor-beta 1 binding protein              | NM_000627 | -360 -1636                            |           |
| M60974      | growth arrest and DNA-damage-inducible protein                 | NM_001924 | -174 -236 -761                        |           |
| U12535      | epidermal growth factor receptor kinase substrate              | NM_004447 | -80 -89 -622                          |           |
| U61836      | putative cyclin G1 interacting protein                         | BC000669  | -1444 -1834                           |           |
| U67156      | mitogen-activated kinase kinase kinase 5                       | U67156    | -284 -476 -714                        |           |
| U73379      | cyclin-selective ubiquitin carrier protein                     | NM_007019 | -287 -288 -328 -758 -1298 -1404 -1405 |           |
| U83659      | multidrug resistance-associated protein homolog                | AF009670  | -864 -865                             |           |
| X03473      | gene histone H1(0)                                             | NM_005318 | -1694 -1695 -1707                     |           |
| X05360      | CDC2                                                           | NM_001786 | -1350                                 | -117      |
| X16354      | transmembrane carcinoembryonic antigen                         | X16354    | -1178 -1437 -1877                     |           |
| X51688      | cyclin A                                                       | NM_001237 | -341                                  |           |
| X52425      | IL-4-R interleukin 4 receptor                                  | NM_000418 | -1930                                 |           |
| X65550      | mki67a (long type)                                             | X65550    | -1307                                 |           |
| X65550      | mki67a (long type)                                             | X65550    | -1307                                 |           |
| X66087      | a-myb                                                          | X13294    | -370 -405 -439 -594 -596              |           |
| X74330      | DNA primase (subunit p48)                                      | NM_000946 | -145 -186 -321 -322                   |           |
| X74795      | P1-cdc46                                                       | X74795    | -47 -360 -562 -626 -1122              | -486 -490 |
| X97795      | homologous to S. cerevisiae RAD54                              | NM_003579 | -712 -713 -912 -1589                  |           |
| Z29083      | 5T4 gene 5T4 Oncofetal antigen                                 | NM_006670 | -1163                                 |           |
